# Supplementary material
Source: Elsevier journal article supplement (https://authors.library.caltech.edu/69749/3/mmc2.xlsx)
Supplement: mmc2 [file mmc2.xlsx]

## Sheet: Table S1_2015.06.03
Gene	ALA	larvae	ALA/larvae	OMIM	Protein size(s)	Protein feature	TF	Bork KOG	PFAM domain	WBPhenotype	NOT WBPheno
WBGene00016028|C24A1.1|flp-24	10176.3	1.59	6400.21		69 aa	SignalP; Tmhmm; Seg					NOT WBPheno: Bmd; Emb; Gro; Lva; Lvl; Ste; Stp; Variant; embryonic development variant; postembryonic development variant
WBGene00020171|T02H6.1	169.62	0	5654		518-540 aa	Seg; Ncoils		COG2319: FOG: WD40 repeat; KOG0299: U3 snoRNP-associated protein (contains WD40 repeats); meNOG06814: U3 snoRNP-associated 55-kDa protein (U3-55K)	PF00400: WD domain, G-beta repeat		NOT WBPheno: Bmd; Emb; Gro; Let; Lva; Lvl; Ste; Stp; Variant; postembryonic development variant
WBGene00016669|C45G7.2|ilys-2	161.7	0	5390		139 aa	SignalP		NOG86990: Lysozyme protein; euNOG16700: Lysozyme protein; meNOG25907: Lysozyme protein	PF05497: Destabilase		NOT WBPheno: Bmd; Emb; Gro; Let; Lva; Lvl; Ste; Stp; Variant; organism pathogen response variant; postembryonic development variant
WBGene00015380|C03B1.10	93.83	0	3127.67		52 aa	Seg					NOT WBPheno: Bmd; Emb; Gro; Lva; Lvl; Ste; Stp; Variant; postembryonic development variant
WBGene00014848|VM106R.1	92.61	0	3087		308 aa			KOG2723: Uncharacterized conserved protein, contains BTB/POZ domain; meNOG07734: Domain-Containing protein	PF02214: K+ channel tetramerisation domain	WBPhenotype: reduced brood size	NOT WBPheno: Adl; Emb; Gro; Lva; Lvl; Ste; Stp; Variant; postembryonic development variant
WBGene00010377|H12D21.1|nspa-1	43.92	0	1464		34 aa	SignalP; Tmhmm					NOT WBPheno: Variant
WBGene00018917|F56A4.9	128.89	0.11	1171.73		462 aa	SignalP; Seg			PF01030: Receptor L domain
WBGene00045401|T26F2.3	30.4	0	1013.33		316 aa	Seg			PF08652: RAI1 like		NOT WBPheno: Bmd; Emb; Ste; Variant
WBGene00008658|F10F2.6|clec-152	24.49	0.03	816.33								NOT WBPheno: Bmd; Emb; Ste; Variant
WBGene00021334|Y34D9A.10|vps-4	124.34	0.2	621.7		430 aa	Seg		COG0464: ATPases of the AAA+ class; KOG0739: AAA+-type ATPase; meNOG05470: Vacuolar protein sorting	PF00004: ATPase family associated with various cellular activities (AAA); PF01695: IstB-like ATP binding protein; PF04212: MIT (microtubule interacting and transport) domain; PF05496: Holliday junction DNA helicase ruvB N-terminus; PF09336: Vps4 C terminal oligomerisation domain	WBPhenotype: Emb; Gro; Lva; Lvl; Mlt; Prl; Ric; Ste; Unc; endocytic transport variant; organism hypertonic lethality increased; protein aggregation variant; transgene subcellular localization variant
WBGene00009853|F48F7.8	18.18	0	606		223 aa	Tmhmm		KOG3780: Thioredoxin binding protein TBP-2/VDUP1	PF00339: Arrestin (or S-antigen), N-terminal domain
WBGene00013888|ZC412.7|nspa-3	16.08	0	536		34 aa	SignalP; Tmhmm
WBGene00021222|Y19D10A.7	148.44	0.29	511.86		401 aa	SignalP; Seg			PF01030: Receptor L domain		NOT WBPheno: Emb; Gro; Let; Lva; Lvl; Ste; Stp; Variant; postembryonic development variant
WBGene00001816|Y48G8AL.11|haf-6	14.25	0	475		668 aa	Tmhmm; Seg; Ncoils		COG1132: ABC-type multidrug transport system, ATPase and permease components; KOG0058: Peptide exporter, ABC superfamily; meNOG05573: Atp-Binding protein	PF00005: ABC transporter; PF00664: ABC transporter transmembrane region		NOT WBPheno: Bmd; Emb; Ste; Variant
WBGene00019842|R02F11.4	13.32	0	444		630 aa	Seg; Ncoils		COG4886: Leucine-rich repeat (LRR) protein; KOG0531: Protein phosphatase 1, regulatory subunit, and related proteins; meNOG08815: Collaborates with CEP110, being involved in the suppression of a cilia assembly program. Required for correct spindle formation and has a role in cytokinesis. Required for recruitment of CEP110 to the protein	PF00560: Leucine Rich Repeat	WBPhenotype: protein aggregation variant; transgene subcellular localization variant	NOT WBPheno: Bmd; Emb; Gro; Let; Lva; Lvl; Ste; Stp; Variant; postembryonic development variant
WBGene00011673|T10B9.3|cyp-13A6	29.82	0.07	426	OMIM:145500 [HYPERTENSION, ESSENTIAL]; OMIM:231095 [GHOSAL HEMATODIAPHYSEAL DYSPLASIA; GHDD]; OMIM:614158 [BLEEDING DISORDER, PLATELET-TYPE, 14; BDPLT14]	518 aa	SignalP; Tmhmm; Seg		COG2124: Cytochrome P450; KOG0158: Cytochrome P450 CYP3/CYP5/CYP6/CYP9 subfamilies; meNOG09107: Cytochrome protein	PF00067: Cytochrome P450		NOT WBPheno: Bmd; Emb; Ste; Variant
WBGene00003474|T08G5.10|mtl-2	10.87	0	362.33		63 aa	Seg		KOG4738: Predicted metallothionein		WBPhenotype: Age; Gro; cadmium hypersensitive; growth variant; reduced brood size	NOT WBPheno: Bmd; Emb; Let; Lva; Lvl; Ste; Stp; Variant; postembryonic development variant
WBGene00001756|F11G11.1|gst-8	10.21	0	340.33		206 aa			KOG1695: Glutathione S-transferase; meNOG14525: Glutathione protein	PF00043: Glutathione S-transferase, C-terminal domain; PF02798: Glutathione S-transferase, N-terminal domain		NOT WBPheno: Bmd; Emb; Let; Ste; Variant; postembryonic development variant
WBGene00001450|F49E10.3|flp-7	4518.55	13.51	334.46		177 aa	SignalP; Seg			PF01581: FMRFamide related peptide family		NOT WBPheno: Bmd; Emb; Gro; Let; Lva; Lvl; Ste; Stp; Variant; postembryonic development variant
WBGene00004806|T27F2.1|skp-1	12.95	0.04	323.75		535 aa	Seg; Ncoils		KOG2441: mRNA splicing factor/probable chromatin binding snw family nuclear protein; meNOG05325: SNW domain-containing protein 1	PF02731: SKIP/SNW domain	WBPhenotype: Clr; Egl; Emb; Lva; Mlt; Pvl; Sck; Ste; cell proliferation increased; excess intestinal cells; protein aggregation variant; transgene subcellular localization variant	NOT WBPheno: Bmd; Variant
WBGene00005953|K09D9.10|srx-62	9.45	0	315		300 aa	Tmhmm; Seg			PF00001: 7 transmembrane receptor (rhodopsin family); PF02118: Srg family chemoreceptor; PF10316: Serpentine type 7TM GPCR chemoreceptor Srbc; PF10323: Serpentine type 7TM GPCR chemoreceptor Srv; PF10328: Serpentine type 7TM GPCR chemoreceptor Srx		NOT WBPheno: Bmd; Emb; Gro; Lva; Lvl; Ste; Stp; Variant; postembryonic development variant
WBGene00001781|C02A12.1|gst-33	87.52	0.3	291.73		213 aa	Seg		KOG1695: Glutathione S-transferase; meNOG15557: Glutathione protein	PF00043: Glutathione S-transferase, C-terminal domain; PF02798: Glutathione S-transferase, N-terminal domain		NOT WBPheno: Bmd; Emb; Gro; Let; Lva; Lvl; Ste; Stp; Variant; cadmium hypersensitive; postembryonic development variant
WBGene00003890|T20H4.1|osm-10	11.63	0.04	290.75		419 aa	Seg			PF00635: MSP (Major sperm protein) domain	WBPhenotype: osmotic avoidance variant	NOT WBPheno: Bmd; Emb; Gro; Let; Lva; Lvl; Ste; Stp; Variant; embryonic development variant; postembryonic development variant; quinine chemotaxis variant
WBGene00001456|F33D4.3|flp-13	2063.11	7.52	274.35		160 aa	SignalP		euNOG20798: Annotation not available; meNOG27855: Annotation not available	PF01581: FMRFamide related peptide family	WBPhenotype: fat content increased	NOT WBPheno: Bmd; Emb; Gro; Let; Lva; Lvl; Ste; Stp; Variant; ammonium acetate chemotaxis defective; axon morphology variant; chemotaxis variant; growth variant; movement variant; postembryonic development variant; sodium chloride chemotaxis variant
WBGene00018562|F47D12.6	7.82	0	260.67		100 aa	Tmhmm; Seg					NOT WBPheno: Bmd; Emb; Gro; Let; Lva; Lvl; Ste; Stp; Variant; embryonic development variant; postembryonic development variant
WBGene00005656|C13D9.2|srr-5	7.81	0	260.33		364 aa	Tmhmm			PF03268: Caenorhabditis protein of unknown function, DUF267		NOT WBPheno: Bmd; Emb; Gro; Lva; Lvl; Ste; Stp; Variant; postembryonic development variant
WBGene00009529|F38B2.2	918.67	3.7	248.29		174 aa	SignalP					NOT WBPheno: Bmd; Emb; Gro; Let; Lva; Lvl; Ste; Stp; Variant; postembryonic development variant
WBGene00044570|T22B7.8	7.42	0	247.33		62 aa	Seg
WBGene00022448|Y110A2AL.13	388.24	1.57	247.29		168 aa			COG0760: Parvulin-like peptidyl-prolyl isomerase; KOG3259: Peptidyl-prolyl cis-trans isomerase; meNOG17924: Peptidyl-Prolyl cis-trans isomerase NIMA-interacting 1 (EC 5.2.1.8)	PF00397: WW domain		NOT WBPheno: Bmd; Emb; Let; Ste; Variant
WBGene00010971|R01E6.7	103.57	0.43	240.86		289 aa	SignalP; Seg					NOT WBPheno: Bmd; Emb; Let; Ste; Variant; postembryonic development variant
WBGene00009692|F44E5.5	136.37	0.6	227.28		645 aa	Seg; Ncoils		COG0443: Molecular chaperone; KOG0101: Molecular chaperones HSP70/HSC70, HSP70 superfamily	PF00012: Hsp70 protein; PF06723: MreB/Mbl protein		NOT WBPheno: Bmd; Emb; Let; Ste; Variant; postembryonic development variant
WBGene00020269|T05H4.6	1540.36	6.9	223.24		559 aa	Seg		COG1503: Peptide chain release factor 1 (eRF1); KOG0688: Peptide chain release factor 1 (eRF1); meNOG05200: Eukaryotic protein	PF03463: eRF1 domain 1; PF03464: eRF1 domain 2; PF03465: eRF1 domain 3	WBPhenotype: Emb; Lva; Ste; Unc; pattern of transgene expression variant; protein aggregation variant; receptor mediated endocytosis defective; transgene subcellular localization variant
WBGene00012294|W06A7.5|nspa-8	6.41	0	213.67		34 aa	SignalP; Tmhmm					NOT WBPheno: Emb; Gro; Let; Lva; Lvl; Ste; Stp; Variant; postembryonic development variant
WBGene00077682|F58B4.7	6.24	0	208		96 aa	SignalP; Seg
WBGene00013765|Y113G7B.16	8.12	0.04	203		489 aa	Seg		KOG2607: CDK5 activator-binding protein; meNOG05437: CDK5 regulatory subunit-associated protein 3			NOT WBPheno: Bmd; Emb; Let; Ste; Variant; postembryonic development variant
WBGene00020515|T14G12.6	28.28	0.14	202		349 aa	Tmhmm; Seg			PF02343: TRA-1 regulated protein R03H10.4		NOT WBPheno: Bmd; Emb; Ste; Variant
WBGene00044271|H12D21.12|nspa-2	5.9	0	196.67		34 aa	SignalP; Tmhmm
WBGene00003843|ZK455.8|oct-2	541.03	2.79	193.92	OMIM:180300 [RHEUMATOID ARTHRITIS; RA]; OMIM:212140 [CARNITINE DEFICIENCY, SYSTEMIC PRIMARY; CDSP]; OMIM:266600 [INFLAMMATORY BOWEL DISEASE 1; IBD1]	414-757 aa	Tmhmm; Seg		COG0477: Permeases of the major facilitator superfamily; KOG0255: Synaptic vesicle transporter SVOP and related transporters (major facilitator superfamily); meNOG04784: Organic cation protein	PF00083: Sugar (and other) transporter; PF07690: Major Facilitator Superfamily		NOT WBPheno: Bmd; Emb; Gro; Lva; Lvl; Ste; Stp; Variant; postembryonic development variant
WBGene00009174|F26H9.2	123.36	0.66	186.91		508 aa	Seg	Thomas+W_TF	KOG4339: RPEL repeat-containing protein; meNOG09453: Phosphatase and actin regulator 4	PF02755: RPEL repeat	WBPhenotype: Emb	NOT WBPheno: Bmd; Let; Ste; Variant
WBGene00044272|H12D21.13|nspa-4	5.55	0	185		34 aa	SignalP; Tmhmm
WBGene00012799|Y43F4A.4	5.12	0	170.67	OMIM:248600 [MAPLE SYRUP URINE DISEASE]	105 aa	Seg		KOG1182: Branched chain alpha-keto acid dehydrogenase complex, alpha subunit; meNOG05501: Dehydrogenase
WBGene00009750|F46A8.7	150.63	0.9	167.37		36 aa						NOT WBPheno: Let
WBGene00014002|ZK593.2	125.21	0.76	164.75		123-152 aa	SignalP					NOT WBPheno: Bmd; Emb; Gro; Lva; Lvl; Ste; Stp; Variant; postembryonic development variant
WBGene00010011|F53H4.6	6.47	0.04	161.75	OMIM:133540 [COCKAYNE SYNDROME, TYPE B; CSB]; OMIM:211980 [LUNG CANCER]; OMIM:214150 [CEREBROOCULOFACIOSKELETAL SYNDROME 1; COFS1]; OMIM:278800 [DE SANCTIS-CACCHIONE SYNDROME]; OMIM:600630 [UV-SENSITIVE SYNDROME; UVS]; OMIM:613761 [MACULAR DEGENERATION, AGE-RELATED, 5; ARMD5]	933 aa	Seg		COG0553: Superfamily II DNA/RNA helicases, SNF2 family; KOG0387: Transcription-coupled repair protein CSB/RAD26 (contains SNF2 family DNA-dependent ATPase domain); meNOG07859: Excision repair protein ERCC	PF00176: SNF2 family N-terminal domain		NOT WBPheno: Emb; Gro; Lva; Lvl; Ste; Stp; Variant; organism UV hypersensitive; postembryonic development variant
WBGene00022733|ZK418.3	4.74	0	158		145 aa	Tmhmm; Seg; Ncoils		KOG4694: Predicted membrane protein			NOT WBPheno: Bmd; Emb; Ste; Variant
WBGene00021164|Y5H2B.1	4.67	0	155.67	OMIM:211100 [FUCOSYLTRANSFERASE 1; FUT1]	364 aa	Tmhmm; Seg			PF01531: Glycosyl transferase family 11		NOT WBPheno: Bmd; Emb; Gro; Lva; Lvl; Ste; Stp; Variant; postembryonic development variant
WBGene00009852|F48F7.7|arrd-24	4.43	0	147.67		346 aa	Seg		KOG3780: Thioredoxin binding protein TBP-2/VDUP1; meNOG08072: Arrestin domain containing protein	PF00339: Arrestin (or S-antigen), N-terminal domain; PF02752: Arrestin (or S-antigen), C-terminal domain		NOT WBPheno: Bmd; Emb; Gro; Let; Lva; Lvl; Ste; Stp; Variant; postembryonic development variant
WBGene00013782|Y116A8B.5	5.88	0.04	147	OMIM:102200 [PITUITARY ADENOMA, GROWTH HORMONE-SECRETING]	435 aa	Tmhmm; Seg		KOG3656: FOG: 7 transmembrane receptor; meNOG10691: Somatostatin protein	PF00001: 7 transmembrane receptor (rhodopsin family); PF10320: Serpentine type 7TM GPCR chemoreceptor Srsx
WBGene00004997|T22G5.7|spp-12	4.37	0	145.67		106 aa	SignalP				WBPhenotype: Age	NOT WBPheno: Bmd; Emb; Gro; Let; Lva; Lvl; Ste; Stp; Variant; postembryonic development variant; transgene expression reduced
WBGene00013256|Y57A10A.13	4.34	0	144.67		710 aa	Seg		KOG2207: Predicted 3-5 exonuclease; meNOG29090: Annotation not available	PF01612: 3'-5' exonuclease		NOT WBPheno: Bmd; Emb; Gro; Let; Lva; Lvl; Ste; Stp; Variant; postembryonic development variant
WBGene00011866|T20F10.5	4.22	0	140.67		441 aa	Seg		KOG1846: Uncharacterized conserved protein, contains Sec7 domain			NOT WBPheno: Emb; Gro; Lva; Lvl; Ste; Stp; Variant; postembryonic development variant
WBGene00015074|B0238.10	3325.02	23.67	140.47		278 aa			COG0456: Acetyltransferases; KOG3139: N-acetyltransferase; meNOG12913: N-Acetyltransferase	PF00583: Acetyltransferase (GNAT) family; PF08445: FR47-like protein		NOT WBPheno: Bmd; Emb; Gro; Let; Lva; Lvl; Ste; Stp; Variant; postembryonic development variant
WBGene00021904|Y55B1AL.2	4.15	0	138.33	OMIM:601675 [TRICHOTHIODYSTROPHY, PHOTOSENSITIVE; TTDP]	71 aa			KOG3451: Uncharacterized conserved protein; meNOG21196: Transcription factor			NOT WBPheno: Bmd; Emb; Gro; Lva; Lvl; Ste; Stp; Variant; postembryonic development variant
WBGene00021377|Y37E11B.5	4.04	0	134.67		554 aa			COG0042: tRNA-dihydrouridine synthase; KOG2333: Uncharacterized conserved protein; meNOG05483: Trna-Dihydrouridine synthase 3-like EC 1	PF01207: Dihydrouridine synthase (Dus)		NOT WBPheno: Bmd; Emb; Gro; Let; Lva; Lvl; Ste; Stp; Variant; postembryonic development variant
WBGene00019488|K07D4.9	783.25	5.91	132.53		102 aa	SignalP; Seg
WBGene00044638|F23A7.8	95186.2	752	126.58		67 aa
WBGene00003175|C44B11.3|mec-12	14380.1	114	126.14	OMIM:611603 [LISSENCEPHALY 3; LIS3]; OMIM:613180 [POLYMICROGYRIA WITH OPTIC NERVE HYPOPLASIA]	450 aa	Seg		COG5023: Tubulin; KOG1376: Alpha tubulin; meNOG04309: Tubulin, alpha protein	PF00091: Tubulin/FtsZ family, GTPase domain; PF03953: Tubulin C-terminal domain	WBPhenotype: touch resistant	NOT WBPheno: Bmd; Emb; Let; Ste; Variant; embryonic development variant; postembryonic development variant
WBGene00044274|H12D21.15|nspa-7	3.75	0	125		34 aa	SignalP; Tmhmm
WBGene00044273|H12D21.14|nspa-6	3.75	0	125		34 aa	SignalP; Tmhmm
WBGene00044144|M153.4	3.72	0	124		150 aa			NOG43961: Zinc finger protein; euNOG09826: Annotation not available; meNOG19716: Annotation not available
WBGene00016958|C55F2.2|ilys-4	3.7	0	123.33		159 aa	SignalP; Seg			PF05497: Destabilase
WBGene00013130|Y52B11B.1	3.62	0	120.67		92 aa	SignalP; Tmhmm; Seg				WBPhenotype: Dpy; Unc	NOT WBPheno: Bmd; Emb; Gro; Let; Lva; Lvl; Ste; Stp; Variant; postembryonic development variant
WBGene00016662|C45B2.8	3.48	0	116		73 aa						NOT WBPheno: Bmd; Emb; Ste; Variant
WBGene00044028|F33H1.6	52.7	0.47	112.13		70 aa	SignalP; Tmhmm
WBGene00003706|F09C6.9|nhr-116	10.85	0.1	108.5		448 aa	Seg; Ncoils	Walhout_TF		PF00104: Ligand-binding domain of nuclear hormone receptor; PF00105: Zinc finger, C4 type (two domains)		NOT WBPheno: Bmd; Emb; Gro; Lva; Lvl; Ste; Stp; Variant; brood size variant; postembryonic development variant
WBGene00018817|F54D12.4	155.78	1.44	108.18		45 aa					WBPhenotype: Bmd; Lva; Sck; Unc	NOT WBPheno: Emb; Let; Variant; postembryonic development variant
WBGene00013465|Y67H2A.10	3.18	0	106		23-608 aa	Seg; Ncoils	Thomas+W_TF
WBGene00013855|ZC116.3	3.12	0	104	OMIM:261100 [MEGALOBLASTIC ANEMIA 1]	4047 aa	SignalP; Seg		KOG4292: Cubilin, multiligand receptor mediating cobalamin absorption; meNOG05717: Cotransporter which plays a role in lipoprotein, vitamin and iron metabolism, by facilitating their uptake. Binds to ALB, MB, Kappa and lambda-light chains, TF, hemoglobin, GC, SCGB1A1, APOA1, high density lipoprotein, and the GIF-cobalamin complex. The binding of all ligands required calcium. Serves as important t…	PF00008: EGF-like domain; PF00431: CUB domain; PF07645: Calcium-binding EGF domain		NOT WBPheno: Bmd; Emb; Ste; Variant
WBGene00008502|F01G4.3	218.63	2.13	102.64		1266 aa	Seg		COG4581: Superfamily II RNA helicase; KOG0947: Cytoplasmic exosomal RNA helicase SKI2, DEAD-box superfamily; meNOG04434: Superkiller viralicidic activity 2 protein	PF00270: DEAD/DEAH box helicase; PF00271: Helicase conserved C-terminal domain; PF08148: DSHCT (NUC185) domain		NOT WBPheno: Bmd; Emb; Gro; Let; Lva; Lvl; Ste; Stp; Variant; postembryonic development variant
WBGene00018585|F48A11.4	3.07	0	102.33		324 aa						NOT WBPheno: Bmd; Emb; Gro; Lva; Lvl; Ste; Stp; Variant; postembryonic development variant
WBGene00023431|C25E10.13	18.04	0.18	100.22		75 aa	SignalP
WBGene00017531|F16H11.2	2.91	0	97		57 aa	Seg; Ncoils
WBGene00007511|C10C5.7	2.9	0	96.67		83 aa	SignalP; Tmhmm
WBGene00003473|K11G9.6|mtl-1	2.9	0	96.67		75 aa	Seg		KOG4738: Predicted metallothionein		WBPhenotype: Age; Gro; cadmium hypersensitive; growth variant; organism environmental stimulus response variant; reduced brood size	NOT WBPheno: Bmd; Emb; Let; Lva; Lvl; Ste; Stp; Variant; dauer development variant; developmental timing variant; isothermal tracking behavior variant; postembryonic development variant
WBGene00022851|ZK1127.4	53.72	0.56	95.93		349 aa	Seg; Ncoils		KOG3034: Isoamyl acetate-hydrolyzing esterase and related enzymes; meNOG07798: BRCA2 and CDKN1A interacting protein		WBPhenotype: Clr; Emb; Gro; Let; Lva; Pch; RNAi resistant; Sck; Ste; Unc; early larval arrest; gonad development variant; meiotic progression prophase variant; pattern of transgene expression variant; receptor mediated endocytosis defective; reduced brood size; somatic transgene silencing variant; transgene expression increased
WBGene00021056|W06B4.1	100.47	1.06	94.78		432 aa	Seg; Ncoils		KOG1794: N-Acetylglucosamine kinase			NOT WBPheno: Bmd; Emb; Gro; Lva; Lvl; Ste; Stp; Variant; postembryonic development variant
WBGene00021039|W05F2.7	12.98	0.14	92.71		1227 aa	SignalP; Seg					NOT WBPheno: Bmd; Emb; Gro; Lva; Lvl; Ste; Stp; Variant; postembryonic development variant
WBGene00019007|F57B10.14	324.65	3.54	91.71		56 aa						NOT WBPheno: Bmd; Emb; Ste; Variant
WBGene00022522|ZC132.3	2.74	0	91.33		578-799 aa	Tmhmm; Seg			PF10325: Serpentine type 7TM GPCR chemoreceptor Srz	WBPhenotype: Age	NOT WBPheno: Bmd; Emb; Gro; Let; Lva; Lvl; Ste; Stp; Variant; postembryonic development variant
WBGene00019421|K05F6.10	2.72	0	90.67		453 aa						NOT WBPheno: Bmd; Emb; Gro; Lva; Lvl; Ste; Stp; Variant; postembryonic development variant
WBGene00003393|EEED8.5|mog-5	15.23	0.17	89.59		1200 aa	Seg; Ncoils		COG1185: Polyribonucleotide nucleotidyltransferase (polynucleotide phosphorylase); COG1643: HrpA-like helicases; KOG0922: DEAH-box RNA helicase; meNOG04098: RNA helicase	PF00270: DEAD/DEAH box helicase; PF00271: Helicase conserved C-terminal domain; PF00575: S1 RNA binding domain; PF04408: Helicase associated domain (HA2); PF07717: Domain of unknown function (DUF1605)	WBPhenotype: Emb; Gro; Let; Lva; Mel; Mlt; Mog; Rup; Ste; Stp; Unc; cell proliferation increased; excess intestinal cells; germ cell morphology variant; hermaphrodite self sterile; protein aggregation variant; sperm excess; sperm recruitment variant; spermatogenesis to oogenesis switch defective; transgene subcellular localization variant	NOT WBPheno: vulva morphology variant; yolk synthesis variant
WBGene00022143|Y71G12B.3	8.05	0.09	89.44		140 aa	Tmhmm; Seg					NOT WBPheno: Bmd; Emb; Ste; Variant
WBGene00012193|W02A11.2|vps-25	2.65	0	88.33		183 aa			KOG4068: Uncharacterized conserved protein; meNOG10690: Vacuolar protein sorting-associated protein 25	PF05871: ESCRT-II complex subunit	WBPhenotype: Gro	NOT WBPheno: Bmd; Emb; Let; Lva; Lvl; Ste; Stp; Variant; postembryonic development variant; transgene expression reduced
WBGene00011343|T01G9.1	60.81	0.7	86.87		220 aa	Tmhmm; Seg					NOT WBPheno: Bmd; Emb; Gro; Let; Lva; Lvl; Ste; Stp; Variant; postembryonic development variant
WBGene00015769|C14C11.7	17.36	0.2	86.8		82 aa	Seg					NOT WBPheno: Bmd; Emb; Gro; Let; Lva; Lvl; Ste; Stp; Variant; postembryonic development variant
WBGene00021984|Y59C2A.1	2.58	0	86		454 aa	SignalP; Seg		COG2866: Predicted carboxypeptidase; KOG2650: Zinc carboxypeptidase; meNOG12049: Carboxypeptidase	PF00246: Zinc carboxypeptidase; PF02244: Carboxypeptidase activation peptide		NOT WBPheno: Bmd; Emb; Gro; Let; Lva; Lvl; Ste; Stp; Variant; postembryonic development variant
WBGene00000037|Y48B6A.8|ace-3	2.58	0	86	OMIM:112100 [YT BLOOD GROUP ANTIGEN]; OMIM:177400 [BUTYRYLCHOLINESTERASE; BCHE]	607 aa	SignalP; Seg		COG2272: Carboxylesterase type B; KOG4389: Acetylcholinesterase/Butyrylcholinesterase; meNOG05392: Cholinesterase	PF00135: Carboxylesterase; PF07859: alpha/beta hydrolase fold		NOT WBPheno: Bmd; Emb; Let; Ste; Variant; postembryonic development variant
WBGene00002020|T27E4.9|hsp-16.49	10.29	0.12	85.75	OMIM:608810 [MYOPATHY, MYOFIBRILLAR, 2, MFM2]; OMIM:613763 [CATARACT, POSTERIOR POLAR, 2; CTPP2]; OMIM:613869 [MYOPATHY, MYOFIBRILLAR, FATAL INFANTILE HYPERTONIC, ALPHA-B CRYSTALLIN-RELATED]	143 aa			KOG3591: Alpha crystallins; meNOG14875: Crystallin protein	PF00011: Hsp20/alpha crystallin family
WBGene00019774|M04G7.3	25.33	0.3	84.43		437-479 aa	Tmhmm					NOT WBPheno: Bmd; Emb; Gro; Let; Lva; Lvl; Ste; Stp; Variant; postembryonic development variant
WBGene00006468|F13E6.6|rhgf-1	14.22	0.17	83.65	OMIM:601626 [LEUKEMIA, ACUTE MYELOID; AML]	1340 aa	Seg; Ncoils		COG5422: RhoGEF, Guanine nucleotide exchange factor for Rho/Rac/Cdc42-like GTPases; KOG3520: Predicted guanine nucleotide exchange factor; meNOG04504: Guanine nucleotide exchange factor	PF00595: PDZ domain (Also known as DHR or GLGF); PF00621: RhoGEF domain; PF09128: Regulator of G protein signalling-like domain	WBPhenotype: Egl; Emb; Mec; Unc	NOT WBPheno: Bmd; Lva; Ste; Variant; aldicarb response variant; levamisole response variant; pharyngeal pumping variant; transgene expression variant; transgene subcellular localization variant
WBGene00008633|F10A3.3|fbxa-18	2.39	0	79.67		187 aa				PF00646: F-box domain		NOT WBPheno: Let; Variant; postembryonic development variant
WBGene00008043|C40H1.8	3.15	0.04	78.75		342 aa	SignalP; Seg		KOG4569: Predicted lipase	PF01764: Lipase (class 3)
WBGene00002019|T27E4.3|hsp-16.48	9.38	0.12	78.17	OMIM:608810 [MYOPATHY, MYOFIBRILLAR, 2, MFM2]; OMIM:613763 [CATARACT, POSTERIOR POLAR, 2; CTPP2]; OMIM:613869 [MYOPATHY, MYOFIBRILLAR, FATAL INFANTILE HYPERTONIC, ALPHA-B CRYSTALLIN-RELATED]	143 aa			KOG3591: Alpha crystallins; meNOG14875: Crystallin protein	PF00011: Hsp20/alpha crystallin family		NOT WBPheno: Let; Variant; postembryonic development variant
WBGene00021810|Y53G8AR.2	10.14	0.13	78		700-741 aa			COG5141: PHD zinc finger-containing protein; KOG0954: PHD finger protein; meNOG06186: Protein Jade		WBPhenotype: Let; Lvl; Muv; Ste	NOT WBPheno: Bmd; Emb; Gro; Lva; Stp; Variant; postembryonic development variant
WBGene00017510|F16B4.9|nhr-178	2.31	0	77		421 aa	Seg	Walhout_TF	KOG3575: FOG: Hormone receptors	PF00104: Ligand-binding domain of nuclear hormone receptor; PF00105: Zinc finger, C4 type (two domains)		NOT WBPheno: Bmd; Emb; Let; Ste; Variant; postembryonic development variant
WBGene00012764|Y41E3.6	4.51	0.06	75.17		113 aa						NOT WBPheno: Let; Variant; postembryonic development variant
WBGene00001078|F22B7.10|dpy-19	2.99	0.04	74.75	OMIM:613958 [SPERMATOGENIC FAILURE 9; SPGF9]	683 aa	Tmhmm; Seg		KOG4587: Predicted membrane protein; meNOG04561: Annotation not available			NOT WBPheno: Bmd; Emb; Gro; Lva; Lvl; Ram; Ste; Stp; Variant; embryonic development variant; postembryonic development variant
WBGene00006626|F10G7.2|tsn-1	7.37	0.1	73.7		914 aa	Seg		COG1525: Micrococcal nuclease (thermonuclease) homologs; KOG2039: Transcriptional coactivator p100; meNOG04479: Staphylococcal nuclease domain-containing protein 1 (p100 co- activator)	PF00565: Staphylococcal nuclease homologue; PF00567: Tudor domain	WBPhenotype: Gro; protein aggregation variant; transgene expression variant; transgene subcellular localization variant	NOT WBPheno: Adl; Bmd; Emb; Let; Lva; Lvl; Ste; Stp; Variant; alae variant; postembryonic development variant; vulva development variant
WBGene00043056|Y53H1A.5|nfya-2	2.17	0	72.33		281 aa	Seg	Walhout_TF	COG5224: CCAAT-binding factor, subunit B; KOG1561: CCAAT-binding factor, subunit B (HAP2); meNOG12365: Transcription protein	PF02045: CCAAT-binding transcription factor (CBF-B/NF-YA) subunit B		NOT WBPheno: Let
WBGene00022618|ZC477.3	878.35	12.17	72.17		212-330 aa	Tmhmm; Seg; Ncoils		NOG83482: Coiled-Coil domain containing protein; euNOG05514: Coiled-Coil domain containing protein; meNOG10669: Coiled-Coil domain containing protein			NOT WBPheno: Bmd; Emb; Let; Ste; Variant
WBGene00012058|T26F2.2	102.25	1.44	71.01		292 aa			KOG1982: Nuclear 5-3 exoribonuclease-interacting protein, Rai1p	PF08652: RAI1 like
WBGene00004068|C10G11.5|pnk-1	28.14	0.4	70.35	OMIM:234200 [NEURODEGENERATION WITH BRAIN IRON ACCUMULATION 1; NBIA1]; OMIM:607236 [HYPOPREBETALIPOPROTEINEMIA, ACANTHOCYTOSIS, RETINITIS PIGMENTOSA,]	392-449 aa	Seg		COG5146: Pantothenate kinase, acetyl-CoA regulated; KOG2201: Pantothenate kinase PanK and related proteins; meNOG06824: Pantothenate kinase	PF03630: Fumble	WBPhenotype: Age; Emb; Gro; Lva; Ste	NOT WBPheno: Bmd; Variant; age associated fluorescence increased
WBGene00020618|T20D4.12	2.06	0	68.67		199 aa	SignalP			PF01579: Domain of unknown function DUF19
WBGene00002097|F41G3.16|ins-14	2.06	0	68.67		81 aa	SignalP
WBGene00012806|Y43F4B.9	2.7	0.04	67.5		127-309 aa	Seg		KOG0280: Uncharacterized conserved protein; meNOG11115: WD repeat protein	PF00400: WD domain, G-beta repeat		NOT WBPheno: Bmd; Emb; Ste; Variant
WBGene00008951|F19C6.2	2.7	0.04	67.5		449-495 aa	Seg; Ncoils			PF07093: SGT1 protein		NOT WBPheno: Bmd; Emb; Gro; Let; Lva; Lvl; Ste; Stp; Variant; postembryonic development variant
WBGene00006627|C02F5.8|tsp-1	52.58	0.79	66.56		244 aa	SignalP; Tmhmm; Seg		KOG3882: Tetraspanin family integral membrane protein	PF00335: Tetraspanin family		NOT WBPheno: Bmd; Emb; Let; Ste; Variant; postembryonic development variant
WBGene00008995|F21A3.5	8.64	0.13	66.46	OMIM:604348 [ADVANCED SLEEP-PHASE SYNDROME, FAMILIAL]	526 aa	Seg; Ncoils		KOG1164: Casein kinase (serine/threonine/tyrosine protein kinase)			NOT WBPheno: Bmd; Emb; Ste; Variant
WBGene00003394|T07H6.2|mom-1	222.75	3.38	65.9	OMIM:305600 [FOCAL DERMAL HYPOPLASIA; FDH]	442 aa	Tmhmm		KOG4312: Predicted acyltransferase; meNOG09045: Porcupine protein	PF03062: MBOAT family	WBPhenotype: Egl D; Gro; Mel; Pvl; Rup; Spn; Unc; excess pharyngeal cells; no Intestine	NOT WBPheno: Bmd; Emb; Let; Lva; Lvl; P granule localization defective; Ste; Stp; Variant; postembryonic development variant
WBGene00022115|Y71F9AL.10	305.16	4.7	64.93		189 aa	Seg		KOG0801: Predicted E3 ubiquitin ligase; meNOG08427: E3 ubiquitin-protein ligase	PF00097: Zinc finger, C3HC4 type (RING finger)		NOT WBPheno: Bmd; Emb; Let; Ste; Variant; postembryonic development variant
WBGene00021839|Y54E10BL.5|nduf-5	1.94	0	64.67		121 aa			KOG4110: NADH:ubiquinone oxidoreductase, NDUFS5/15kDa	PF10200: NADH:ubiquinone oxidoreductase, NDUFS5-15kDa	WBPhenotype: reduced brood size
WBGene00003911|C09B8.7|pak-1	455.68	7.1	64.18	OMIM:300558 [MENTAL RETARDATION, X-LINKED 30; MRX30]	124-572 aa	Seg		COG0515: Serine/threonine protein kinase; KOG0578: p21-activated serine/threonine protein kinase; meNOG04132: Serine/Threonine-Protein kinase pak	PF00069: Protein kinase domain; PF00786: P21-Rho-binding domain; PF07714: Protein tyrosine kinase	WBPhenotype: axon guidance variant	NOT WBPheno: Bmd; Emb; Ste; Variant
WBGene00009377|F34D10.8	1.92	0	64		53 aa	Seg
WBGene00017315|F09G2.6|ugt-36	1.91	0	63.67	OMIM:143500 [GILBERT SYNDROME]; OMIM:218800 [CRIGLER-NAJJAR SYNDROME]; OMIM:237900 [HYPERBILIRUBINEMIA, TRANSIENT FAMILIAL NEONATAL]; OMIM:601816 [BILIRUBIN, SERUM LEVEL OF, QUANTITATIVE TRAIT LOCUS 1; BILIQTL1]; OMIM:606785 [CRIGLER-NAJJAR SYNDROME, TYPE II]; OMIM:612560 [BONE MINERAL DENSITY QUANTITATIVE TRAIT LOCUS 12; BMND12]	533 aa	SignalP; Tmhmm; Seg		KOG1192: UDP-glucuronosyl and UDP-glucosyl transferase	PF00201: UDP-glucoronosyl and UDP-glucosyl transferase; PF04101: Glycosyltransferase family 28 C-terminal domain		NOT WBPheno: Bmd; Emb; Gro; Lva; Lvl; Ste; Stp; Variant; postembryonic development variant
WBGene00044394|B0034.7	1.9	0	63.33		78 aa	Seg
WBGene00011565|T07C5.2|nhr-272	1.9	0	63.33		334 aa		Walhout_TF	meNOG05839: Retinoic acid protein	PF00104: Ligand-binding domain of nuclear hormone receptor; PF00105: Zinc finger, C4 type (two domains)		NOT WBPheno: Bmd; Emb; Gro; Let; Lva; Lvl; Ste; Stp; Variant; postembryonic development variant
WBGene00005653|T26H2.8|srr-2	1.88	0	62.67		387 aa	Tmhmm; Seg			PF03268: Caenorhabditis protein of unknown function, DUF267		NOT WBPheno: Bmd; Emb; Gro; Lva; Lvl; Ste; Stp; Variant; postembryonic development variant
WBGene00011672|T10B9.2|cyp-13A5	41.13	0.66	62.32	OMIM:145500 [HYPERTENSION, ESSENTIAL]; OMIM:231095 [GHOSAL HEMATODIAPHYSEAL DYSPLASIA; GHDD]; OMIM:614158 [BLEEDING DISORDER, PLATELET-TYPE, 14; BDPLT14]	520 aa	Tmhmm; Seg		COG2124: Cytochrome P450; KOG0158: Cytochrome P450 CYP3/CYP5/CYP6/CYP9 subfamilies; meNOG09107: Cytochrome protein	PF00067: Cytochrome P450		NOT WBPheno: Bmd; Emb; Let; Ste; Variant; postembryonic development variant
WBGene00017332|F10D2.6|ugt-37	10.59	0.17	62.29	OMIM:143500 [GILBERT SYNDROME]; OMIM:218800 [CRIGLER-NAJJAR SYNDROME]; OMIM:237900 [HYPERBILIRUBINEMIA, TRANSIENT FAMILIAL NEONATAL]; OMIM:601816 [BILIRUBIN, SERUM LEVEL OF, QUANTITATIVE TRAIT LOCUS 1; BILIQTL1]; OMIM:606785 [CRIGLER-NAJJAR SYNDROME, TYPE II]; OMIM:612560 [BONE MINERAL DENSITY QUANTITATIVE TRAIT LOCUS 12; BMND12]	528 aa	SignalP; Tmhmm; Seg		KOG1192: UDP-glucuronosyl and UDP-glucosyl transferase	PF00201: UDP-glucoronosyl and UDP-glucosyl transferase; PF04101: Glycosyltransferase family 28 C-terminal domain		NOT WBPheno: Bmd; Emb; Gro; Let; Lva; Lvl; Ste; Stp; Variant; postembryonic development variant
WBGene00010752|K10G4.3	1.84	0	61.33		202 aa	Seg					NOT WBPheno: Bmd; Emb; Gro; Let; Lva; Lvl; Ste; Stp; Variant; postembryonic development variant
WBGene00006576|C38C10.1|tkr-1	21.8	0.36	60.56	OMIM:146110 [HYPOGONADOTROPIC HYPOGONADISM]	406 aa	Tmhmm		KOG4219: G protein-coupled receptor; meNOG06384: Tachykinin protein	PF00001: 7 transmembrane receptor (rhodopsin family); PF10320: Serpentine type 7TM GPCR chemoreceptor Srsx; PF10328: Serpentine type 7TM GPCR chemoreceptor Srx	WBPhenotype: fat content reduced	NOT WBPheno: Bmd; Egl; Emb; Gro; Let; Lva; Lvl; Ste; Stp; Unc; Variant; embryonic development variant; fat content variant; gut granule development variant; postembryonic development variant
WBGene00006563|Y47D3A.27|teg-1	4.23	0.07	60.43		370 aa	Seg		KOG2950: Uncharacterized protein involved in protein-protein interaction, contains polyproline-binding GYF domain; meNOG15407: CD2 antigen cytoplasmic tail-binding protein 2			NOT WBPheno: Let; Variant; postembryonic development variant
WBGene00000199|Y71F9AL.16|arx-1	4.23	0.07	60.43		425 aa			COG5277: Actin and related proteins; KOG0678: Actin-related protein Arp2/3 complex, subunit Arp3; meNOG05664: Actin-Related protein	PF00022: Actin	WBPhenotype: Emb; Spo; cell membrane morphology variant; chromosome segregation variant; cleavage furrow termination defective early emb; gastrulation variant; germ cell morphology variant; protein subcellular localization variant; reduced brood size	NOT WBPheno: Let; Variant; postembryonic development variant; transgene expression variant
WBGene00022783|ZK652.2|tomm-7	13.78	0.23	59.91		58 aa			KOG4449: Translocase of outer mitochondrial membrane complex, subunit TOM7	PF08038: TOM7 family
WBGene00019188|H11E01.3	43.51	0.73	59.6		1464 aa	Seg; Ncoils				WBPhenotype: Emb	NOT WBPheno: Bmd; Gro; Lva; Lvl; Ste; Stp; Variant; postembryonic development variant
WBGene00018795|F54C4.4	1.78	0	59.33		119 aa	Seg					NOT WBPheno: Bmd; Emb; Gro; Let; Lva; Lvl; Ste; Stp; Variant; embryonic development variant; postembryonic development variant
WBGene00001770|F21H7.1|gst-22	49.52	0.84	58.95		218 aa			KOG1695: Glutathione S-transferase; meNOG15557: Glutathione protein	PF00043: Glutathione S-transferase, C-terminal domain; PF02798: Glutathione S-transferase, N-terminal domain		NOT WBPheno: Let; Variant; postembryonic development variant
WBGene00021348|Y37E3.4|moag-4	6124.84	104.81	58.44		82 aa	Seg; Ncoils		KOG4488: Small EDRK-rich protein H4F5			NOT WBPheno: Bmd; Emb; Ste; Variant
WBGene00015701|C11D2.3	15.49	0.27	57.37		121 aa	Ncoils					NOT WBPheno: Bmd; Emb; Gro; Let; Lva; Lvl; Ste; Stp; Variant; postembryonic development variant
WBGene00009033|F21H7.12	1.72	0	57.33		188 aa	Tmhmm; Seg
WBGene00018782|F54A3.3|cct-3	410.03	7.17	57.19		543 aa	Seg		COG0459: Chaperonin GroEL (HSP60 family); KOG0364: Chaperonin complex component, TCP-1 gamma subunit (CCT3); meNOG04805: T-Complex protein 1 subunit gamma	PF00118: TCP-1/cpn60 chaperonin family	WBPhenotype: Emb; microtubule polymerization variant
WBGene00011288|R102.1	13.71	0.24	57.13		125 aa						NOT WBPheno: Let; Variant; postembryonic development variant
WBGene00021693|Y48G8AR.2	1.71	0	57		339 aa	Seg; Ncoils					NOT WBPheno: Bmd; Emb; Let; Ste; Variant
WBGene00006318|F34D6.3|sup-9	11.4	0.2	57	OMIM:612292 [BIRK-BAREL MENTAL RETARDATION DYSMORPHISM SYNDROME]	329 aa	SignalP; Tmhmm		COG1226: Kef-type K+ transport systems, predicted NAD-binding component; KOG4404: Tandem pore domain K+ channel TASK3/THIK-1; meNOG04669: Potassium channel	PF07885: Ion channel		NOT WBPheno: Bmd; Egl D; Emb; Gro; Let; Lva; Lvl; Ste; Stp; Variant; anoxia hypersensitive; postembryonic development variant
WBGene00043998|T21C12.8	1.69	0	56.33		325 aa	Tmhmm; Seg
WBGene00019570|K09E2.1	1.69	0	56.33		915 aa	SignalP; Seg; Ncoils		KOG3544: Collagens (type IV and type XIII), and related proteins; meNOG07624: Type XII collagen interacts with type I collagen- containing fibrils, the COL1 domain could be associated with the surface of the fibrils, and the COL2 and NC3 domains may be localized in the perifibrillar protein	PF00092: von Willebrand factor type A domain		NOT WBPheno: Bmd; Emb; Gro; Lva; Lvl; Ste; Stp; Variant; postembryonic development variant
WBGene00021201|Y17G9B.4	13.51	0.24	56.29		262 aa	Seg		COG0652: Peptidyl-prolyl cis-trans isomerase (rotamase) - cyclophilin family; KOG0865: Cyclophilin type peptidyl-prolyl cis-trans isomerase	PF00160: Cyclophilin type peptidyl-prolyl cis-trans isomerase/CLD	WBPhenotype: protein aggregation variant; transgene subcellular localization variant	NOT WBPheno: Bmd; Emb; Gro; Let; Lva; Lvl; Ste; Stp; Variant; postembryonic development variant
WBGene00018803|F54D10.2|fbxa-24	151.96	2.74	55.46		219 aa	Seg			PF01827: FTH domain		NOT WBPheno: Let; Variant; postembryonic development variant
WBGene00001466|F58H1.4|flr-2	17.64	0.32	55.12		122 aa	SignalP; Tmhmm			PF03045: DAN domain	WBPhenotype: Din; Esp; bag of worms; diet induced life span variant	NOT WBPheno: Bmd; Emb; Let; Ste; Variant; postembryonic development variant
WBGene00006768|ZK637.8|unc-32	14.18	0.26	54.54	OMIM:219200 [CUTIS LAXA, AUTOSOMAL RECESSIVE, TYPE IIA; ARCL2A]; OMIM:278250 [WRINKLY SKIN SYNDROME; WSS]; OMIM:602722 [RENAL TUBULAR ACIDOSIS, DISTAL, AUTOSOMAL RECESSIVE; RTADR]	883-905 aa	Tmhmm; Seg; Ncoils		COG1269: Archaeal/vacuolar-type H+-ATPase subunit I; KOG2189: Vacuolar H+-ATPase V0 sector, subunit a; meNOG05797: Subunit a	PF01496: V-type ATPase 116kDa subunit family	WBPhenotype: Emb; Gro; Let; Pvl; Sck; Ste; Unc; distal tip cell migration variant; embryonic arrest; organism hypertonic lethality increased; pattern of transgene expression variant; pharyngeal pumping irregular; receptor mediated endocytosis defective	NOT WBPheno: coelomocyte uptake defective; transgene subcellular localization variant
WBGene00001680|F52A8.2|gpb-2	5.38	0.1	53.8		356 aa	Ncoils		COG2319: FOG: WD40 repeat; KOG0286: G-protein beta subunit; meNOG04777: Guanine nucleotide binding protein	PF00400: WD domain, G-beta repeat	WBPhenotype: Lon; arecoline hypersensitive; coiler; grinder relaxation defective; level of protein expression variant; organism starvation hypersensitive; pharyngeal muscle physiology variant; pharyngeal pumping rate variant; pharynx slippery; protein expression reduced	NOT WBPheno: Bmd; Egl; Emb; Let; Ste; Variant; antimicrobial gene expression variant; postembryonic development variant
WBGene00012280|W05E10.1	63.99	1.2	53.33	OMIM:610951 [CEROID LIPOFUSCINOSIS, NEURONAL, 7; CLN7]	484 aa	Tmhmm		KOG2325: Predicted transporter/transmembrane protein; meNOG06557: Major facilitator superfamily domain containing protein	PF07690: Major Facilitator Superfamily		NOT WBPheno: Bmd; Emb; Gro; Let; Lva; Lvl; Ste; Stp; Variant; postembryonic development variant
WBGene00044643|H17B01.5	1.59	0	53		93 aa	SignalP; Tmhmm
WBGene00021168|Y5H2B.6|cyp-33C12	1.58	0	52.67	OMIM:122700 [COUMARIN RESISTANCE]; OMIM:122720 [CYTOCHROME P450, SUBFAMILY IIA, POLYPEPTIDE 6; CYP2A6]; OMIM:137750 [GLAUCOMA 1, OPEN ANGLE, A; GLC1A]; OMIM:137760 [GLAUCOMA, PRIMARY OPEN ANGLE; POAG]; OMIM:188890 [TOBACCO ADDICTION, SUSCEPTIBILITY TO]; OMIM:202110 [ADRENAL HYPERPLASIA, CONGENITAL, DUE TO 17-ALPHA-HYDROXYLASE DEFICIENCY]; OMIM:211980 [LUNG CANCER]; OMIM:231300 [GLAUCOMA 3, PRIMAR…	426 aa	SignalP; Seg		COG2124: Cytochrome P450; KOG0156: Cytochrome P450 CYP2 subfamily; meNOG12844: Cytochrome P450 family member cyp protein
WBGene00018625|F49D11.1|prp-17	2.1	0.04	52.5		567 aa			COG2319: FOG: WD40 repeat; KOG0282: mRNA splicing factor; meNOG04771: Cell division cycle 40 homolog protein	PF00400: WD domain, G-beta repeat	WBPhenotype: Bmd; Emb; Led; Lva; RNAi resistant; Rup; Ste; Unc; cell proliferation increased; distal tip cell migration variant; excess intestinal cells; late embryonic arrest; somatic transgene silencing variant; transgene expression increased	NOT WBPheno: Variant
WBGene00045488|F57B1.9	1.57	0	52.33		54-357 aa	SignalP; Tmhmm; Seg			PF04789: Protein of unknown function (DUF621)
WBGene00020506|T14E8.3|dop-3	1.57	0	52.33	OMIM:103780 [ALCOHOL DEPENDENCE]; OMIM:159900 [MYOCLONIC DYSTONIA]; OMIM:181500 [SCHIZOPHRENIA; SCZD]; OMIM:190300 [TREMOR, HEREDITARY ESSENTIAL, 1; ETM1]	245-607 aa	SignalP; Tmhmm; Seg		KOG3656: FOG: 7 transmembrane receptor; meNOG07513: Dopamine receptor	PF00001: 7 transmembrane receptor (rhodopsin family); PF10320: Serpentine type 7TM GPCR chemoreceptor Srsx; PF10323: Serpentine type 7TM GPCR chemoreceptor Srv; PF10328: Serpentine type 7TM GPCR chemoreceptor Srx	WBPhenotype: aqueous adaptation defective	NOT WBPheno: Bmd; Emb; Let; Ste; Variant; enhanced taste aversion defective
WBGene00015385|C03B8.2	1.56	0	52		59 aa			KOG0654: G2/Mitotic-specific cyclin A
WBGene00010925|M153.2	1.55	0	51.67		458 aa	Tmhmm; Seg		KOG3098: Uncharacterized conserved protein; meNOG06888: Annotation not available	PF05978: Ion channel regulatory protein UNC-93; PF07690: Major Facilitator Superfamily		NOT WBPheno: Bmd; Emb; Gro; Lva; Lvl; Ste; Stp; Variant; postembryonic development variant
WBGene00001518|F47D12.1|gar-2	6.7	0.13	51.54		245-667 aa	SignalP; Tmhmm; Seg; Ncoils		KOG3656: FOG: 7 transmembrane receptor; meNOG19277: G-Protein-Linked acetylcholine receptor	PF00001: 7 transmembrane receptor (rhodopsin family); PF10320: Serpentine type 7TM GPCR chemoreceptor Srsx; PF10328: Serpentine type 7TM GPCR chemoreceptor Srx	WBPhenotype: Hic; acetylcholinesterase inhibitor hypersensitive; activity level variant; directionality variant; levamisole hypersensitive	NOT WBPheno: Bmd; Egl; Emb; Gro; Let; Lva; Lvl; Ste; Stp; Unc; Variant; body posture variant; embryonic development variant; levamisole response variant; organism pathogen response variant; postembryonic development variant
WBGene00002018|Y46H3A.2|hsp-16.41	1.53	0	51	OMIM:608810 [MYOPATHY, MYOFIBRILLAR, 2, MFM2]; OMIM:613763 [CATARACT, POSTERIOR POLAR, 2; CTPP2]; OMIM:613869 [MYOPATHY, MYOFIBRILLAR, FATAL INFANTILE HYPERTONIC, ALPHA-B CRYSTALLIN-RELATED]	143 aa			KOG3591: Alpha crystallins; meNOG14875: Crystallin protein	PF00011: Hsp20/alpha crystallin family		NOT WBPheno: Let; Variant; postembryonic development variant
WBGene00001475|F15B9.7|fmi-1	1.53	0	51		2596 aa	SignalP; Tmhmm; Seg		KOG4289: Cadherin EGF LAG seven-pass G-type receptor; meNOG04518: Cadherin EGF LAG seven-pass G-type receptor	PF00008: EGF-like domain; PF00028: Cadherin domain; PF00054: Laminin G domain; PF02210: Laminin G domain	WBPhenotype: Gro; Ste; Stp; cell polarity variant	NOT WBPheno: Bmd; Emb; Let; Lva; Lvl; Variant; axon development variant; axon guidance variant; axon morphology variant; phasmid socket absent; postembryonic development variant
WBGene00008372|D1054.5	118.87	2.34	50.8		395 aa	Seg					NOT WBPheno: Bmd; Emb; Let; Ste; Variant; postembryonic development variant
WBGene00004497|Y41D4B.5|rps-28	2499.93	49.45	50.55		65 aa	Seg		COG2053: Ribosomal protein S28E/S33; KOG3502: 40S ribosomal protein S28; meNOG21798: Ribosomal protein S28		WBPhenotype: Emb; Gro; Mlt; Sck; Ste
WBGene00001747|F29F11.6|gsp-1	150.16	2.98	50.39		329 aa			COG0639: Diadenosine tetraphosphatase and related serine/threonine protein phosphatases; KOG0374: Serine/threonine specific protein phosphatase PP1, catalytic subunit; meNOG04633: Protein phosphatase	PF00149: Calcineurin-like phosphoesterase	WBPhenotype: Let; Mei; Sck; Ste	NOT WBPheno: Bmd; Emb; Variant; postembryonic development variant
WBGene00020190|T03F1.8	1.51	0	50.33		205-216 aa	Ncoils		COG0194: Guanylate kinase; KOG0707: Guanylate kinase; meNOG08325: Guanylate kinase	PF00625: Guanylate kinase	WBPhenotype: Gro; Let; Pvl; Ste; Unc; pattern of transgene expression variant; receptor mediated endocytosis defective; thin	NOT WBPheno: Bmd; Emb; Variant; postembryonic development variant
WBGene00020374|T09A12.5	1.49	0	49.67		63 aa	Tmhmm		KOG3491: Predicted membrane protein; meNOG21317: Associated protein
WBGene00001132|T11B7.4|alp-1	2196.08	44.45	49.41	OMIM:601493 [CARDIOMYOPATHY, DILATED, 1C; CMD1C]; OMIM:609452 [MYOPATHY, MYOFIBRILLAR, 4; MFM4]	425-1424 aa	Seg; Ncoils		KOG1703: Adaptor protein Enigma and related PDZ-LIM proteins; meNOG10433: LIM domain-binding protein 3	PF00412: LIM domain	WBPhenotype: Unc	NOT WBPheno: Bmd; Emb; Let; Ste; Variant; germ cell morphology variant; postembryonic development variant; reduced brood size; transgene expression reduced
WBGene00044413|B0205.12	1.47	0	49		50 aa	SignalP
WBGene00016126|C26B2.4|nhr-258	1.46	0	48.67		371 aa		Walhout_TF	KOG3575: FOG: Hormone receptors	PF00105: Zinc finger, C4 type (two domains)		NOT WBPheno: Bmd; Emb; Gro; Let; Lva; Lvl; Ste; Stp; Variant; postembryonic development variant
WBGene00006811|E03A3.6|unc-79	35.36	0.73	48.44		870-2092 aa	Seg		KOG4820: Involved in anesthetic response in C.elegans; meNOG29767: Annotation not available		WBPhenotype: Gro; Jud; Slu; Unc; diethyl ether hypersensitive; fainter; halothane hypersensitive; male mating efficiency reduced	NOT WBPheno: Bmd; Emb; Let; Lva; Lvl; Ste; Stp; Variant; embryonic development variant; enflurane hypersensitive; isoflurane hypersensitive; postembryonic development variant
WBGene00018911|F56A4.3	61.01	1.27	48.04		105 aa			KOG1695: Glutathione S-transferase	PF02798: Glutathione S-transferase, N-terminal domain		NOT WBPheno: Emb; Gro; Let; Lva; Lvl; Ste; Stp; Variant; postembryonic development variant
WBGene00045356|T03E6.9	1.44	0	48		338 aa	Tmhmm; Seg			PF10318: Serpentine type 7TM GPCR chemoreceptor Srh; PF10327: Serpentine type 7TM GPCR chemoreceptor Sri		NOT WBPheno: Emb; Gro; Lva; Lvl; Ste; Stp; Variant; postembryonic development variant
WBGene00011745|T13F2.5|sre-4	6.14	0.13	47.23		368 aa	Tmhmm			PF03125: C. elegans Sre G protein-coupled chemoreceptor		NOT WBPheno: Bmd; Emb; Gro; Lva; Lvl; Ste; Stp; Variant; postembryonic development variant
WBGene00014259|ZK1320.11	479.68	10.18	47.12		204-250 aa	Tmhmm		KOG1001: Helicase-like transcription factor HLTF/DNA helicase RAD5, DEAD-box superfamily			NOT WBPheno: Bmd; Emb; Ste; Variant
WBGene00004498|B0412.4|rps-29	734.23	15.6	47.07		56 aa			COG0199: Ribosomal protein S14; KOG3506: 40S ribosomal protein S29; meNOG21162: Ribosomal protein S29		WBPhenotype: Emb; Gro; Lva; Lvl; Pch; Sck; Ste; pathogen resistance increased
WBGene00018413|F44C8.1|cyp-33C4	1.4	0.03	46.67	OMIM:122700 [COUMARIN RESISTANCE]; OMIM:122720 [CYTOCHROME P450, SUBFAMILY IIA, POLYPEPTIDE 6; CYP2A6]; OMIM:137750 [GLAUCOMA 1, OPEN ANGLE, A; GLC1A]; OMIM:137760 [GLAUCOMA, PRIMARY OPEN ANGLE; POAG]; OMIM:188890 [TOBACCO ADDICTION, SUSCEPTIBILITY TO]; OMIM:202110 [ADRENAL HYPERPLASIA, CONGENITAL, DUE TO 17-ALPHA-HYDROXYLASE DEFICIENCY]; OMIM:211980 [LUNG CANCER]; OMIM:231300 [GLAUCOMA 3, PRIMAR…	493 aa	SignalP; Seg		COG2124: Cytochrome P450; KOG0156: Cytochrome P450 CYP2 subfamily; meNOG12844: Cytochrome P450 family member cyp protein	PF00067: Cytochrome P450		NOT WBPheno: Let; Variant; postembryonic development variant
WBGene00017524|F16G10.9	1.4	0	46.67		226 aa	SignalP; Tmhmm; Seg			PF02343: TRA-1 regulated protein R03H10.4		NOT WBPheno: Bmd; Emb; Ste; Variant
WBGene00007281|C03E10.3	1.4	0	46.67		334 aa	SignalP; Tmhmm; Seg					NOT WBPheno: Bmd; Emb; Gro; Lva; Lvl; Ste; Stp; Variant; postembryonic development variant
WBGene00015053|B0222.1	26.89	0.58	46.36		285 aa	SignalP; Tmhmm; Seg			PF01705: CX module		NOT WBPheno: Bmd; Emb; Gro; Let; Lva; Lvl; Ste; Stp; Variant; postembryonic development variant
WBGene00012897|Y46G5A.5|pisy-1	10.18	0.22	46.27		220 aa	Tmhmm		COG0558: Phosphatidylglycerophosphate synthase; KOG3240: Phosphatidylinositol synthase; meNOG11850: Phosphatidylinositol synthase	PF01066: CDP-alcohol phosphatidyltransferase	WBPhenotype: Let; Ste; protein expression absent	NOT WBPheno: Bmd; Emb; Gro; Lva; Lvl; Stp; Variant; postembryonic development variant
WBGene00008414|D2030.4	5094.6	110.7	46.02		123 aa	Seg; Ncoils		KOG3468: NADH:ubiquinone oxidoreductase, NDUFB7/B18 subunit; meNOG20795: NADH dehydrogenase	PF05676: NADH-ubiquinone oxidoreductase B18 subunit (NDUFB7)	WBPhenotype: Age; Emb; Gro; Let; Lva; Pvl; Ste; reduced brood size; thin	NOT WBPheno: Variant; postembryonic development variant
WBGene00011605|T08A11.2	1.38	0	46	OMIM:614286 [MYELODYSPLASTIC SYNDROME; MDS]	1322 aa	Seg; Ncoils		COG5181: U2 snRNP spliceosome subunit; KOG0213: Splicing factor 3b, subunit 1; meNOG05211: Splicing factor 3b, subunit 1	PF08920: Splicing factor 3B subunit 1	WBPhenotype: Adl; Emb; Gro; Lva; Lvl; Pvl; Ste; Unc; cell proliferation increased; excess intestinal cells; pattern of transgene expression variant; protein aggregation variant; receptor mediated endocytosis defective; transgene expression increased; transgene subcellular localization variant	NOT WBPheno: Bmd; Variant; embryonic development variant; postembryonic development variant
WBGene00003684|C12D5.8|nhr-94	1.38	0	46	OMIM:125850 [MATURITY-ONSET DIABETES OF THE YOUNG, TYPE 1; MODY1]; OMIM:125853 [DIABETES MELLITUS, NONINSULIN-DEPENDENT; NIDDM]; OMIM:606391 [MATURITY-ONSET DIABETES OF THE YOUNG; MODY]	133-338 aa	Seg	Walhout_TF	KOG3575: FOG: Hormone receptors	PF00104: Ligand-binding domain of nuclear hormone receptor		NOT WBPheno: Bmd; Emb; Gro; Let; Lva; Lvl; Ste; Stp; Variant; postembryonic development variant
WBGene00011248|R11D1.10	3.66	0.08	45.75		394 aa	Seg; Ncoils		KOG1818: Membrane trafficking and cell signaling protein HRS, contains VHS and FYVE domains; meNOG29704: Protein present in Fab1, YOTB, Vac1, and EEA1	PF01363: FYVE zinc finger		NOT WBPheno: Bmd; Emb; Gro; Let; Lva; Lvl; Ste; Stp; Variant; postembryonic development variant
WBGene00006708|Y54G2A.31|ubc-13	33.38	0.73	45.73		151 aa			COG5078: Ubiquitin-protein ligase; KOG0417: Ubiquitin-protein ligase; meNOG07510: Ubiquitin protein	PF00179: Ubiquitin-conjugating enzyme	WBPhenotype: Emb; reduced brood size	NOT WBPheno: Bmd; Let; Ste; Variant; growth variant; movement variant; protein subcellular localization variant; transgene subcellular localization variant
WBGene00044545|EGAP9.4	1.37	0	45.67		122 aa
WBGene00009723|F45D3.3	10.93	0.24	45.54		236 aa	SignalP; Seg					NOT WBPheno: Bmd; Emb; Ste; Variant
WBGene00012829|Y43F8C.7	1239.31	27.54	45		236 aa	SignalP; Seg		KOG4827: Uncharacterized conserved protein; meNOG14057: UPF0510 protein C19orf63			NOT WBPheno: Bmd; Emb; Gro; Lva; Lvl; Ste; Stp; Variant; postembryonic development variant
WBGene00007698|C24F3.4|qns-1	1.34	0	44.67		703 aa			COG0171: NAD synthase; COG0388: Predicted amidohydrolase; KOG2303: Predicted NAD synthase, contains CN hydrolase domain; meNOG04196: Glutamine-Dependent NAD synthetase (EC 6.3.5.1) NAD synthase	PF00795: Carbon-nitrogen hydrolase; PF02540: NAD synthase	WBPhenotype: transgene induced cosuppression variant	NOT WBPheno: Bmd; Emb; Gro; Let; Lva; Lvl; Ste; Stp; Variant; postembryonic development variant
WBGene00005106|M01B2.2|srd-28	1.34	0	44.67		320 aa	Tmhmm			PF10317: Serpentine type 7TM GPCR chemoreceptor Srd		NOT WBPheno: Let; Variant; postembryonic development variant
WBGene00004920|Y71F9B.4|snr-7	88.35	1.98	44.62		77 aa			COG1958: Small nuclear ribonucleoprotein (snRNP) homolog; KOG1780: Small Nuclear ribonucleoprotein G; meNOG21045: Small nuclear ribonucleoprotein	PF01423: LSM domain	WBPhenotype: Clr; Emb; Gro; Lva; Lvl; Muv; RNAi resistant; Sck; Ste; Unc; cell proliferation increased; excess intestinal cells; pattern of transgene expression variant; protein aggregation variant; receptor mediated endocytosis defective; somatic transgene silencing variant; transgene expression increased; transgene subcellular localization variant
WBGene00021553|Y44E3B.2|tyr-5	1.33	0	44.33	OMIM:203290 [ALBINISM, OCULOCUTANEOUS, TYPE III; OCA3]	477 aa	SignalP; Seg		NOG08919: Tyrosinase	PF00264: Common central domain of tyrosinase		NOT WBPheno: Emb; Gro; Lva; Lvl; Ste; Stp; Variant; postembryonic development variant
WBGene00014036|ZK643.5	3.07	0.07	43.86		487 aa	Seg; Ncoils					NOT WBPheno: Bmd; Emb; Let; Ste; Variant; embryonic development variant; postembryonic development variant
WBGene00015956|C18B2.5	1.31	0	43.67		673-699 aa	Seg; Ncoils		meNOG18360: Annotation not available			NOT WBPheno: Bmd; Emb; Gro; Let; Lva; Lvl; Ste; Stp; Variant; postembryonic development variant
WBGene00044654|Y61B8A.4|fbxa-85	2.61	0.06	43.5		307 aa				PF00646: F-box domain; PF01827: FTH domain
WBGene00001888|ZK131.8|his-14	13.89	0.32	43.41		103 aa	Seg		COG2036: Histones H3 and H4; KOG3467: Histone H4; meNOG20073: Histone H4 protein	PF00125: Core histone H2A/H2B/H3/H4; PF00808: Histone-like transcription factor (CBF/NF-Y) and archaeal histone; PF02969: TATA box binding protein associated factor (TAF)
WBGene00001884|ZK131.4|his-10	13.89	0.32	43.41		103 aa	Seg		COG2036: Histones H3 and H4; KOG3467: Histone H4; meNOG20073: Histone H4 protein	PF00125: Core histone H2A/H2B/H3/H4; PF00808: Histone-like transcription factor (CBF/NF-Y) and archaeal histone; PF02969: TATA box binding protein associated factor (TAF)
WBGene00020689|T22D1.12|npr-12	42	0.97	43.3		391 aa	Tmhmm; Seg		KOG3656: FOG: 7 transmembrane receptor; meNOG20179: Neuropeptide F receptor	PF00001: 7 transmembrane receptor (rhodopsin family); PF10320: Serpentine type 7TM GPCR chemoreceptor Srsx	WBPhenotype: reduced brood size	NOT WBPheno: Bmd; Eat; Egl; Emb; Let; Ste; Unc; Variant; satiety behavior variant
WBGene00022769|ZK563.5	409.33	9.47	43.22		239 aa	Seg		KOG1333: Uncharacterized conserved protein; meNOG08365: Annotation not available			NOT WBPheno: Bmd; Emb; Gro; Let; Lva; Lvl; Ste; Stp; Variant; postembryonic development variant
WBGene00016162|C27D6.4	1.72	0.04	43		224-329 aa	Seg; Ncoils	Thomas+W_TF	KOG0709: CREB/ATF family transcription factor; meNOG14631: Camp responsive element-binding protein 3-like	PF00170: bZIP transcription factor; PF07716: Basic region leucine zipper		NOT WBPheno: Bmd; Emb; Gro; Let; Lva; Lvl; RNAi resistant; Ste; Stp; Variant; postembryonic development variant
WBGene00003685|Y39B6A.17|nhr-95	14.07	0.33	42.64		399-509 aa		Walhout_TF	KOG3575: FOG: Hormone receptors	PF00104: Ligand-binding domain of nuclear hormone receptor; PF00105: Zinc finger, C4 type (two domains)		NOT WBPheno: Bmd; Emb; Gro; Let; Lva; Lvl; Ste; Stp; Variant; postembryonic development variant
WBGene00015392|C03G5.2|nspc-7	85.12	2	42.56		101 aa	SignalP
WBGene00009294|F31D4.9	1036.55	24.43	42.43		70 aa	Tmhmm					NOT WBPheno: Bmd; Emb; Ste; Variant
WBGene00009678|F44D12.1	54.67	1.29	42.38	OMIM:266600 [INFLAMMATORY BOWEL DISEASE 1; IBD1]; OMIM:607748 [HYPERCHOLANEMIA, FAMILIAL; FHCA]; OMIM:613558 [DEAFNESS, AUTOSOMAL DOMINANT 51; DFNA51]	1034 aa	Seg; Ncoils		KOG0708: Membrane-associated guanylate kinase MAGUK (contains PDZ, SH3, HOOK and GUK domains); meNOG07119: Protein involved in regulation of apoptosis	PF00595: PDZ domain (Also known as DHR or GLGF)		NOT WBPheno: Bmd; Emb; Gro; Let; Lva; Lvl; Ste; Stp; Variant; postembryonic development variant
WBGene00001900|ZK131.1|his-26	13.53	0.32	42.28		103 aa	Seg		COG2036: Histones H3 and H4; KOG3467: Histone H4; meNOG20073: Histone H4 protein	PF00125: Core histone H2A/H2B/H3/H4; PF00808: Histone-like transcription factor (CBF/NF-Y) and archaeal histone; PF02969: TATA box binding protein associated factor (TAF)
WBGene00004452|C06B8.8|rpl-38	5306.56	129.15	41.09		70 aa			KOG3499: 60S ribosomal protein L38; meNOG21705: Ribosomal protein L38	PF01781: Ribosomal L38e protein family	WBPhenotype: Lva; Pvl; Sck; Ste; reduced brood size	NOT WBPheno: Bmd; Emb; Let; Variant; postembryonic development variant
WBGene00016508|C37H5.5	919.81	22.46	40.95		778 aa	Seg; Ncoils		COG5117: Protein involved in the nuclear export of pre-ribosomes; KOG2153: Protein involved in the nuclear export of pre-ribosomes; meNOG04287: Nucleolar complex protein 3 homolog (NOC3 protein homolog)	PF03914: CBF/Mak21 family; PF07540: Nucleolar complex-associated protein	WBPhenotype: Egl; Emb; Gro; Lva; Unc; early larval arrest; pattern of transgene expression variant; receptor mediated endocytosis defective	NOT WBPheno: Bmd; Ste; Variant
WBGene00022412|Y102A11A.2	16.27	0.4	40.67		753-772 aa	Seg; Ncoils
WBGene00007538|C12D8.9	1.21	0	40.33		65-92 aa						NOT WBPheno: Bmd; Emb; Gro; Let; Lva; Lvl; Ste; Stp; Variant; postembryonic development variant
WBGene00003746|D2005.2|nlp-8	332.58	8.25	40.31		172 aa	SignalP; Tmhmm; Seg; Ncoils					NOT WBPheno: Bmd; Emb; Gro; Let; Lva; Lvl; Ste; Stp; Variant; postembryonic development variant
WBGene00012808|Y43F8A.1	1.19	0	39.67		62 aa	SignalP; Tmhmm					NOT WBPheno: Bmd; Emb; Gro; Lva; Lvl; Ste; Stp; Variant; postembryonic development variant
WBGene00005012|F26F4.2	107.42	2.73	39.35		181 aa	Seg					NOT WBPheno: Bmd; Emb; Ste; Variant
WBGene00021594|Y46E12BL.1|tig-3	2.36	0.06	39.33		251 aa			KOG3900: Transforming growth factor beta, bone morphogenetic protein and related proteins			NOT WBPheno: Bmd; Emb; Let; Ste; Variant
WBGene00020864|T27E4.6|oac-50	1.57	0.04	39.25		782 aa	SignalP; Tmhmm; Seg		KOG3700: Predicted acyltransferase; meNOG19353: Annotation not available		WBPhenotype: fat content reduced	NOT WBPheno: Bmd; Emb; Gro; Lva; Lvl; Ste; Stp; Variant; fat content variant; postembryonic development variant
WBGene00009039|F22B3.8	21.88	0.56	39.07		497 aa	Seg		COG0515: Serine/threonine protein kinase; KOG0194: Protein tyrosine kinase	PF00069: Protein kinase domain; PF07714: Protein tyrosine kinase	WBPhenotype: Emb; Gro; Ste	NOT WBPheno: Bmd; Let; Variant; postembryonic development variant
WBGene00019945|R08C7.1	1.17	0	39		47 aa	SignalP; Tmhmm				WBPhenotype: reduced brood size
WBGene00000553|K07A9.2|cmk-1	2.73	0.07	39		348 aa	Ncoils		COG0515: Serine/threonine protein kinase; KOG0032: Ca2+/calmodulin-dependent protein kinase, EF-Hand protein superfamily; meNOG04960: Calmodulin-Dependent protein kinase	PF00069: Protein kinase domain; PF06293: Lipopolysaccharide kinase (Kdo/WaaP) family; PF07714: Protein tyrosine kinase		NOT WBPheno: Bmd; Emb; Gro; Let; Lva; Lvl; Ste; Stp; Variant; postembryonic development variant; protein aggregation variant; transgene subcellular localization variant
WBGene00018880|F55D10.5|acc-3	1.16	0	38.67		517 aa	SignalP; Tmhmm; Seg		KOG3644: Ligand-gated ion channel; meNOG05726: Gamma-Aminobutyric-Acid protein	PF02931: Neurotransmitter-gated ion-channel ligand binding domain; PF02932: Neurotransmitter-gated ion-channel transmembrane region		NOT WBPheno: Bmd; Emb; Gro; Let; Lva; Lvl; Ste; Stp; Variant; postembryonic development variant
WBGene00007176|B0399.1|kcnl-1	1.16	0	38.67		555-792 aa	Tmhmm; Seg		KOG3684: Ca2+-activated K+ channel proteins (intermediate/small conductance classes); meNOG04441: Potassium protein	PF02888: Calmodulin binding domain; PF03530: Calcium-activated SK potassium channel; PF07885: Ion channel		NOT WBPheno: Emb; Gro; Let; Lva; Lvl; Ste; Stp; Variant; postembryonic development variant
WBGene00009985|F53F4.1	6.89	0.18	38.28		94 aa	SignalP; Tmhmm; Seg					NOT WBPheno: Bmd; Emb; Gro; Let; Lva; Lvl; Ste; Stp; Variant; postembryonic development variant
WBGene00015994|C18H7.4	113.26	3.01	37.63	OMIM:256700 [NEUROBLASTOMA, SUSCEPTIBILITY TO]; OMIM:613014 [NEUROBLASTOMA, SUSCEPTIBILITY TO, 3; NBLST3]	390 aa			COG0515: Serine/threonine protein kinase; KOG0194: Protein tyrosine kinase; meNOG06948: Tyrosine-Protein kinase	PF00069: Protein kinase domain; PF07714: Protein tyrosine kinase		NOT WBPheno: Let
WBGene00000453|W05E10.3|ceh-32	1.12	0	37.33	OMIM:157170 [HOLOPROSENCEPHALY 2; HPE2]; OMIM:212550 [MICROPHTHALMIA, ISOLATED, WITH CATARACT 2; MCOPCT2]; OMIM:269160 [SCHIZENCEPHALY]	439 aa	Seg	Thomas+W_TF	KOG0775: Transcription factor SIX and related HOX domain proteins; meNOG05840: Homeobox protein	PF00046: Homeobox domain	WBPhenotype: Bmd; Emb; Gro; Lva; Lvl; Unc	NOT WBPheno: Ste; Variant
WBGene00011344|T01G9.2	1239.89	33.31	37.22		419-422 aa			KOG2819: Uncharacterized conserved protein; meNOG06523: UPF0183 protein C16orf70	PF03676: Uncharacterised protein family (UPF0183)		NOT WBPheno: Bmd; Emb; Gro; Let; Lva; Lvl; Ste; Stp; Variant; postembryonic development variant
WBGene00013790|Y116A8C.10	45.19	1.22	37.04		248 aa	Seg		COG1100: GTPase SAR1 and related small G proteins; euNOG05263: Protein involved in small GTPase mediated signal transduction; meNOG09653: Protein involved in small GTPase mediated signal transduction	PF00071: Ras family; PF08477: Miro-like protein		NOT WBPheno: Bmd; Emb; Gro; Let; Lva; Lvl; Ste; Stp; Variant; postembryonic development variant
WBGene00018631|F49D11.7	1.11	0	37		67 aa	Seg					NOT WBPheno: Bmd; Emb; Let; Ste; Variant; postembryonic development variant
WBGene00020250|T05C1.3	2.95	0.08	36.88		233 aa	Ncoils					NOT WBPheno: Bmd; Emb; Let; Ste; Variant; postembryonic development variant
WBGene00019744|M02H5.8	20.9	0.57	36.67		125 aa	SignalP					NOT WBPheno: Bmd; Emb; Let; Ste; Variant; postembryonic development variant
WBGene00013962|ZK287.1	1.46	0.04	36.5	OMIM:614399 [MYOPATHY, EARLY-ONSET, AREFLEXIA, RESPIRATORY DISTRESS, AND DYSPHAGIA;]	497 aa	Seg					NOT WBPheno: Bmd; Emb; Ste; Variant
WBGene00011938|T22H6.2|alh-13	1.09	0	36.33	OMIM:612652 [MENTAL RETARDATION, JOINT HYPERMOBILITY, AND SKIN LAXITY, WITH OR]	800-802 aa	Seg; Ncoils		COG0014: Gamma-glutamyl phosphate reductase; COG0263: Glutamate 5-kinase; KOG1154: Gamma-glutamyl kinase; KOG4165: Gamma-glutamyl phosphate reductase; meNOG05284: Includes: Glutamate 5-kinase (EC 2.7.2.11) ; Gamma-glutamyl phosphate reductase Glutamate-5-semialdehyde	PF00171: Aldehyde dehydrogenase family; PF00696: Amino acid kinase family	WBPhenotype: Gro; pattern of transgene expression variant; receptor mediated endocytosis defective	NOT WBPheno: Bmd; Emb; Let; Ste; Variant; postembryonic development variant
WBGene00007731|C25G4.3	1.09	0	36.33		173-227 aa			KOG4700: Uncharacterized homolog of ribosome-binding factor A	PF02033: Ribosome-binding factor A		NOT WBPheno: Bmd; Emb; Gro; Let; Lva; Lvl; Ste; Stp; Variant; postembryonic development variant
WBGene00006751|C32E8.10|unc-11	1.09	0	36.33		198-657 aa	Seg; Ncoils		KOG0251: Clathrin assembly protein AP180 and related proteins, contain ENTH domain; meNOG04251: Assembly protein	PF01417: ENTH domain; PF07651: ANTH domain	WBPhenotype: Emb; Ric; Stp; Unc; backing uncoordinated; body wall contraction variant; germ cell morphology variant; pharyngeal pumping irregular; pharyngeal pumping reduced; pharyngeal pumping variant; protein subcellular localization variant; reduced brood size	NOT WBPheno: Bmd; Let; Ste; Variant; coelomocyte uptake defective; postembryonic development variant; transgene expression variant
WBGene00003930|ZK1058.2|pat-3	2.54	0.07	36.29	OMIM:173470 [INTEGRIN, BETA-3; ITGB3]; OMIM:273800 [GLANZMANN THROMBASTHENIA; GT]; OMIM:608446 [MYOCARDIAL INFARCTION, SUSCEPTIBILITY TO]	809 aa	SignalP; Tmhmm; Seg		KOG1226: Integrin beta subunit (N-terminal portion of extracellular region); meNOG05736: Integrin, beta protein	PF00362: Integrin, beta chain; PF07965: Integrin beta tail domain; PF07974: EGF-like domain; PF08725: Integrin beta cytoplasmic domain	WBPhenotype: Adl; Emb; Gro; Mig; Pat; Sck; Ste; Unc; actin organization biogenesis variant; body wall muscle actin organization defective; body wall muscle cell polarization variant; body wall muscle morphology variant; body wall muscle myosin organization defective; distal tip cell migration variant; muscle cell morphology variant; progressive paralysis; protein expression absent; somatic gonad …	NOT WBPheno: Bmd; Variant; accumulated cell corpses; embryonic development variant; postembryonic development variant; pumping absent
WBGene00013988|ZK512.10	6.86	0.19	36.11		89 aa	SignalP; Seg
WBGene00016490|C36E6.2	95.21	2.65	35.93		239 aa			KOG4351: Uncharacterized conserved protein; meNOG12446: Annotation not available			NOT WBPheno: Bmd; Emb; Let; Ste; Variant
WBGene00010490|K02B7.2	10.78	0.3	35.93
WBGene00022104|Y71D11A.3	10.39	0.29	35.83		352-401 aa	Seg		COG2159: Predicted metal-dependent hydrolase of the TIM-barrel fold; KOG4245: Predicted metal-dependent hydrolase of the TIM-barrel fold; meNOG05662: 2-Amino-3-Carboxymuconate-6-Semialdehyde decarboxylase	PF04909: Amidohydrolase		NOT WBPheno: Bmd; Emb; Gro; Let; Lva; Lvl; Ste; Stp; Variant; embryonic development variant; postembryonic development variant
WBGene00013728|Y111B2A.2	17.31	0.49	35.33		86 aa	Tmhmm; Seg			PF02937: Cytochrome c oxidase subunit VIc
WBGene00016962|C56C10.4	6.35	0.18	35.28		221 aa	SignalP; Seg			PF01682: DB module		NOT WBPheno: Bmd; Emb; Gro; Let; Lva; Lvl; Ste; Stp; Variant; postembryonic development variant
WBGene00018258|F41B4.2	157.64	4.48	35.19		156-160 aa	SignalP				WBPhenotype: Egl	NOT WBPheno: Bmd; Emb; Ste; Variant
WBGene00017350|F10E7.9	9.13	0.26	35.12		603 aa	Tmhmm; Seg		COG0531: Amino acid transporters; KOG2083: Na+/K+ symporter; meNOG04475: Solute carrier family 12 protein	PF00324: Amino acid permease		NOT WBPheno: Bmd; Emb; Gro; Let; Lva; Lvl; Ste; Stp; Variant; postembryonic development variant
WBGene00007444|C08F8.2	1.05	0	35		719-721 aa	Seg; Ncoils		COG0513: Superfamily II DNA and RNA helicases; KOG0953: Mitochondrial RNA helicase SUV3, DEAD-box superfamily; meNOG04129: Atpase and DNA/RNA helicase able to unwind DNA/DNA, DNA/RNA and RNA/RNA duplexes in the 5'-3' direction. May protect cells from	PF00271: Helicase conserved C-terminal domain; PF12513: Mitochondrial degradasome RNA helicase subunit C terminal	WBPhenotype: Emb; Gro; Lva; Stp; developmental delay postembryonic; pattern of transgene expression variant; receptor mediated endocytosis defective; reduced brood size; transposon silencing variant	NOT WBPheno: Bmd; Let; Ste; Variant; protein aggregation variant; transgene subcellular localization variant
WBGene00013998|ZK550.4	5.92	0.17	34.82		433 aa	Seg; Ncoils		COG1675: Transcription initiation factor IIE, alpha subunit; KOG2593: Transcription initiation factor IIE, alpha subunit; meNOG06808: General transcription factor IIE subunit 1	PF02002: TFIIE alpha subunit; PF08271: TFIIB zinc-binding; PF11521: C-terminal general transcription factor TFIIE alpha	WBPhenotype: Bmd; Emb; Gro; Pch; Rup; Unc; pattern of transgene expression variant; receptor mediated endocytosis defective	NOT WBPheno: Ste; Variant
WBGene00043707	6.94	0.2	34.7
WBGene00043538|W03G1.4	6.94	0.2	34.7		805 aa	Seg; Ncoils			PF06869: Protein of unknown function (DUF1258)	WBPhenotype: Emb; fat content reduced	NOT WBPheno: Bmd; Gro; Lva; Lvl; Ste; Stp; Variant; fat content variant; postembryonic development variant
WBGene00019985	6.94	0.2	34.7
WBGene00019308	6.94	0.2	34.7
WBGene00015881	6.94	0.2	34.7
WBGene00010489	6.94	0.2	34.7
WBGene00044025|T01G1.4	3.1	0.09	34.44	OMIM:613861 [RETINITIS PIGMENTOSA 59; RP59]	299 aa	Seg; Ncoils		COG0020: Undecaprenyl pyrophosphate synthase; KOG1602: Cis-prenyltransferase; meNOG06290: Dehydrodolichyl diphosphate synthase	PF01255: Putative undecaprenyl diphosphate synthase
WBGene00012518|Y32B12A.3	1.03	0	34.33		217 aa			COG4122: Predicted O-methyltransferase; KOG1663: O-methyltransferase; meNOG14334: Catechol-O-Methyltransferasedomain-Containing protein 1			NOT WBPheno: Bmd; Emb; Let; Ste; Variant; postembryonic development variant
WBGene00022786|ZK652.8	8.88	0.26	34.15		171 aa	Ncoils					NOT WBPheno: Bmd; Emb; Gro; Let; Lva; Lvl; Ste; Stp; Variant; embryonic development variant; postembryonic development variant
WBGene00008173|C48B4.10	3.07	0.09	34.11		182 aa	Tmhmm					NOT WBPheno: Bmd; Emb; Gro; Let; Lva; Lvl; Ste; Stp; Variant; embryonic development variant; glp; postembryonic development variant
WBGene00019509|K07H8.9	531.41	15.77	33.7		254 aa	Seg		COG5176: Splicing factor (branch point binding protein); KOG1588: RNA-binding protein Sam68 and related KH domain proteins; meNOG05274: Rna-Binding protein that plays a central role in myelinization. Binds to the 5'-NACUAAY-N(1,20)-UAAY-3' RNA core sequence. Acts by regulating pre-mRNA splicing, mRNA export, mRNA stability and protein translation. Required to protect and promote stability of mRNAs	PF00013: KH domain	WBPhenotype: Let; Ste	NOT WBPheno: Bmd; Emb; Gro; Lva; Lvl; Stp; Variant; postembryonic development variant
WBGene00018848|F55A3.2	1.01	0	33.67		786 aa	Seg				WBPhenotype: Ste	NOT WBPheno: Bmd; Emb; Gro; Lva; Lvl; Stp; Variant; postembryonic development variant
WBGene00009136|F25H9.3	1.01	0	33.67		352 aa	Seg					NOT WBPheno: Bmd; Emb; Gro; Let; Lva; Lvl; Ste; Stp; Variant; postembryonic development variant
WBGene00006831|C52E12.2|unc-104	1.34	0.04	33.5	OMIM:118210 [CHARCOT-MARIE-TOOTH DISEASE, AXONAL, TYPE 2A1; CMT2A1]; OMIM:171300 [PHEOCHROMOCYTOMA]; OMIM:256700 [NEUROBLASTOMA, SUSCEPTIBILITY TO]; OMIM:610357 [SPASTIC PARAPLEGIA 30, AUTOSOMAL RECESSIVE; SPG30]; OMIM:614213 [NEUROPATHY, HEREDITARY SENSORY, TYPE IIC; HSN2C]; OMIM:614255 [MENTAL RETARDATION, AUTOSOMAL DOMINANT 9; MRD9]	1584-1628 aa	Seg; Ncoils		COG5059: Kinesin-like protein; KOG0245: Kinesin-like protein; meNOG04360: Kinesin-Like protein	PF00169: PH domain; PF00225: Kinesin motor domain; PF12423: Kinesin protein 1B; PF12473: Kinesin protein	WBPhenotype: Unc; axon morphology variant; ectopic axon outgrowth; protein subcellular localization variant; transgene subcellular localization variant	NOT WBPheno: Bmd; Emb; Ste; Variant; axon trajectory variant; coelomocyte uptake defective; loss of asymmetry AWC; presynaptic component localization variant
WBGene00008431|D2085.6	23.16	0.7	33.09	OMIM:300818 [PAROXYSMAL NOCTURNAL HEMOGLOBINURIA; PNH]	444 aa	Tmhmm; Seg		COG0438: Glycosyltransferase; KOG1111: N-acetylglucosaminyltransferase complex, subunit PIG-A/SPT14, required for phosphatidylinositol biosynthesis/Sulfolipid synthase; meNOG04407: Phosphatidylinositol protein	PF00534: Glycosyl transferases group 1; PF08288: PIGA (GPI anchor biosynthesis)	WBPhenotype: Him	NOT WBPheno: Bmd; Emb; Gro; Let; Lva; Lvl; Ste; Stp; Variant; postembryonic development variant
WBGene00021864|Y54F10BM.10|fbxa-1	0.99	0	33		302 aa				PF00646: F-box domain; PF01827: FTH domain		NOT WBPheno: Bmd; Emb; Ste; Variant
WBGene00010093|F55C5.4|capg-2	7.9	0.24	32.92		1010 aa	Seg		KOG1949: Uncharacterized conserved protein; meNOG10840: Non-Smc condensin II complex, subunit G2	PF12422: Condensin II non structural maintenance of chromosomes subunit	WBPhenotype: Bli; Emb; Gro; Let; Pvl; Sck; Ste; Unc; anaphase bridging; chromosome condensation failure; germ cell morphology variant; meiotic chromosome segregation variant; mitotic chromosome segregation variant; pattern of transgene expression variant; receptor mediated endocytosis defective; reduced brood size	NOT WBPheno: transgene subcellular localization variant
WBGene00016807|C50D2.3	85.47	2.6	32.87		152 aa	Seg		KOG3528: FOG: PDZ domain	PF00595: PDZ domain (Also known as DHR or GLGF)	WBPhenotype: Ric	NOT WBPheno: Bmd; Emb; Gro; Let; Lva; Lvl; Ste; Stp; Variant; postembryonic development variant
WBGene00012122|T28C6.8	22.31	0.68	32.81		119 aa	Tmhmm; Seg		KOG4517: Uncharacterized conserved protein	PF10164: Uncharacterized conserved protein (DUF2367)		NOT WBPheno: Bmd; Emb; Ste; Variant
WBGene00044176|C30G7.2	0.98	0	32.67		189 aa	SignalP; Tmhmm; Seg		NOG39233: Annotation not available; euNOG12299: Annotation not available; meNOG21720: Annotation not available
WBGene00001899|ZK131.2|his-25	43.56	1.34	32.51		136 aa			COG2036: Histones H3 and H4; KOG1745: Histones H3 and H4; meNOG18419: Histone H3 protein	PF00125: Core histone H2A/H2B/H3/H4
WBGene00013429|Y66D12A.3	13	0.4	32.5		313 aa						NOT WBPheno: Bmd; Emb; Ste; Variant
WBGene00016837|C50F2.3	0.97	0	32.33		855 aa	Seg		KOG2047: mRNA splicing factor; meNOG04351: Xpa-Binding protein 2		WBPhenotype: Cyk; Emb; Gro; Led; Let; Lva; Lvl; Mul; Ste; cell proliferation increased; excess intestinal cells; late embryonic arrest; protein aggregation variant; reduced brood size; thin; transgene subcellular localization variant	NOT WBPheno: Bmd; Variant
WBGene00004206|M03F8.2|pst-1	0.97	0	32.33		408-440 aa	Tmhmm; Seg		COG0697: Permeases of the drug/metabolite transporter (DMT) superfamily; KOG1581: UDP-galactose transporter related protein; meNOG05045: Adenosine 3'-phospho 5'-phosphosulfate transporter 1 (PAPS transporter 1) protein	PF00892: EamA-like transporter family; PF03151: Triose-phosphate Transporter family; PF08449: UAA transporter family	WBPhenotype: Emb; HSN migration variant; Let; Lvl; Mlt; Sle; Ste; axon branching variant; axon fasciculation variant; axon guidance variant; axon midline crossing variant; axon trajectory variant; commissure handedness defective; cord commissures fail to reach target; early larval arrest; heparan sulfate biosynthesis variant; hypodermis disorganized; late embryonic arrest; pharynx unattached; pre…	NOT WBPheno: Bmd; CAN cell migration variant; Gro; Lva; Stp; Variant; cell fate transformation; nervous system morphology variant; postembryonic development variant
WBGene00013887|ZC412.6|nspa-5	17.93	0.56	32.02		34 aa	SignalP; Tmhmm
WBGene00019260|H34I24.1	53.38	1.67	31.96		258 aa	SignalP; Seg					NOT WBPheno: Bmd; Emb; Gro; Let; Lva; Lvl; Ste; Stp; Variant; embryonic development variant; postembryonic development variant
WBGene00022309|Y77E11A.6	178.23	5.62	31.71		108 aa			COG1594: DNA-directed RNA polymerase, subunit M/Transcription elongation factor TFIIS; KOG2906: RNA polymerase III subunit C11; meNOG18910: RNA polymerase	PF01096: Transcription factor S-II (TFIIS)		NOT WBPheno: Bmd; Emb; Let; Ste; Variant; postembryonic development variant
WBGene00007414|C07E3.3	0.95	0	31.67		382 aa	Seg; Ncoils					NOT WBPheno: Bmd; Emb; Let; Ste; Variant; postembryonic development variant
WBGene00013081|Y51A2D.14	0.94	0	31.33		54 aa	SignalP; Tmhmm					NOT WBPheno: Bmd; Emb; Gro; Let; Lva; Lvl; Ste; Stp; Variant; postembryonic development variant
WBGene00009113|F25D7.4	424.02	13.55	31.29		874-932 aa	Seg; Ncoils		KOG3592: Microtubule-associated proteins
WBGene00011319|T01C3.2	171.71	5.52	31.11		98 aa				PF10163: Transcription factor e(y)2	WBPhenotype: Let; Ste	NOT WBPheno: Bmd; Emb; Gro; Lva; Lvl; Stp; Variant; postembryonic development variant
WBGene00001555|T04D3.4|gcy-35	0.93	0	31		688 aa	Seg; Ncoils		COG2114: Adenylate cyclase, family 3 (some proteins contain HAMP domain); KOG4171: Adenylate/guanylate kinase; meNOG05207: Guanylate cyclase	PF00211: Adenylate and Guanylate cyclase catalytic domain; PF07701: Heme NO binding associated		NOT WBPheno: Bmd; Emb; Gro; Let; Lva; Lvl; Ste; Stp; Variant; carbon dioxide avoidance variant; organism pathogen response variant; postembryonic development variant
WBGene00001045|Y47H9C.5|dnj-27	2.17	0.07	31		318-788 aa	SignalP		COG0484: DnaJ-class molecular chaperone with C-terminal Zn finger domain; COG0526: Thiol-disulfide isomerase and thioredoxins; KOG0191: Thioredoxin/protein disulfide isomerase; KOG0713: Molecular chaperone (DnaJ superfamily); meNOG05559: Homolog, subfamily C, member 10 protein	PF00085: Thioredoxin; PF00226: DnaJ domain		NOT WBPheno: Bmd; Emb; Let; Ste; Variant; postembryonic development variant
WBGene00020148|T01D1.3	0.92	0	30.67		216 aa	SignalP					NOT WBPheno: Bmd; Emb; Gro; Let; Lva; Lvl; Ste; Stp; Variant; postembryonic development variant
WBGene00007502|C09H10.8|glb-4	0.92	0	30.67		344 aa	Seg		KOG3378: Globins and related hemoproteins			NOT WBPheno: Bmd; Emb; Gro; Let; Lva; Lvl; Ste; Stp; Variant; postembryonic development variant
WBGene00000951|K03B8.9|deg-3	9.17	0.3	30.57		564 aa	SignalP; Tmhmm; Seg		KOG3645: Acetylcholine receptor; meNOG06474: Acetylcholine protein	PF02931: Neurotransmitter-gated ion-channel ligand binding domain; PF02932: Neurotransmitter-gated ion-channel transmembrane region		NOT WBPheno: Bmd; Emb; Gro; Let; Lva; Lvl; Ste; Stp; Variant; coelomocyte uptake defective; postembryonic development variant
WBGene00005105|T26E4.12|srd-27	1.52	0.05	30.4		320 aa	Tmhmm			PF10317: Serpentine type 7TM GPCR chemoreceptor Srd		NOT WBPheno: Bmd; Emb; Ste; Variant
WBGene00022597|ZC395.5	0.91	0	30.33		74 aa						NOT WBPheno: Bmd; Emb; Gro; Let; Lva; Lvl; Ste; Stp; Variant; embryonic development variant; postembryonic development variant
WBGene00012423|Y10G11A.1	19.83	0.66	30.05	OMIM:266120 [URIDINE 5-PRIME MONOPHOSPHATE HYDROLASE DEFICIENCY, HEMOLYTIC ANEMIA]	301 aa			KOG3128: Uncharacterized conserved protein; meNOG12931: Nucleotidase	PF05822: Pyrimidine 5'-nucleotidase (UMPH-1)		NOT WBPheno: Bmd; Emb; Ste; Variant
WBGene00017238|F08B4.7	13.82	0.46	30.04		142 aa	Seg		COG5136: U1 snRNP-specific protein C; KOG3454: U1 snRNP-specific protein C; meNOG21053: Small nuclear ribonucleoprotein		WBPhenotype: Age; Emb; Gro; Stp; cell proliferation increased; excess intestinal cells; pattern of transgene expression variant; receptor mediated endocytosis defective	NOT WBPheno: Bmd; Let; Sck; Ste; Variant; growth variant; postembryonic development variant
WBGene00021367|Y37E11AM.3	0.9	0	30		109 aa						NOT WBPheno: Bmd; Emb; Ste; Variant
WBGene00009219|F28D1.11|dpm-3	0.9	0	30	OMIM:612937 [CONGENITAL DISORDER OF GLYCOSYLATION, TYPE Io; CDG1O]	95 aa	SignalP; Tmhmm; Ncoils		KOG4841: Dolichol-phosphate mannosyltransferase, subunit 3; meNOG20785: Dolichol-Phosphate mannosyltransferase subunit 3 (Dolichol- phosphate mannose synthase subunit 3) DPM synthase complex	PF08285: Dolichol-phosphate mannosyltransferase subunit 3 (DPM3)	WBPhenotype: Sck; Stp; small	NOT WBPheno: Bmd; Emb; Gro; Let; Lva; Lvl; Ste; Variant; postembryonic development variant
WBGene00001905|F17E9.12|his-31	0.9	0	30		103 aa	Seg		COG2036: Histones H3 and H4; KOG3467: Histone H4; meNOG20073: Histone H4 protein	PF00125: Core histone H2A/H2B/H3/H4; PF00808: Histone-like transcription factor (CBF/NF-Y) and archaeal histone; PF02969: TATA box binding protein associated factor (TAF)	WBPhenotype: Emb	NOT WBPheno: Bmd; Ste; Variant
WBGene00006743|Y16B4A.1|unc-3	9.84	0.33	29.82		491 aa	Seg	Thomas+W_TF	KOG3836: HLH transcription factor EBF/Olf-1 and related DNA binding proteins; meNOG05447: Transcription protein	PF01833: IPT/TIG domain	WBPhenotype: P lineages variant; Ric; Unc; ectopic neuron; levamisole hypersensitive; neuron development variant; neuron number variant; transgene expression variant	NOT WBPheno: Bmd; Emb; Gro; Let; Lva; Lvl; Ste; Stp; Variant; anchor cell invasion variant; postembryonic development variant
WBGene00043992|F58A4.14	1.18	0.04	29.5	OMIM:209900 [BARDET-BIEDL SYNDROME; BBS]	443 aa	Seg		COG0457: FOG: TPR repeat; KOG1124: FOG: TPR repeat; meNOG07377: May be required for the dynein-mediated transport of pericentriolar proteins to the centrosome. Required for microtubule anchoring at the centrosome but not for microtubule nucleation. The BBSome complex is required for ciliogenesis but is dispensable for centriolar satellite function. This ciliogenic function is mediated in part by …			NOT WBPheno: Dyf; Let
WBGene00005088|Y45F10B.14|srd-10	0.88	0	29.33		320 aa	Tmhmm; Seg			PF10317: Serpentine type 7TM GPCR chemoreceptor Srd; PF10318: Serpentine type 7TM GPCR chemoreceptor Srh; PF10326: Serpentine type 7TM GPCR chemoreceptor Str		NOT WBPheno: Bmd; Emb; Ste; Variant
WBGene00011154|R09A8.5	3.48	0.12	29		208 aa	SignalP; Tmhmm; Seg					NOT WBPheno: Bmd; Emb; Gro; Let; Lva; Lvl; Ste; Stp; Variant; postembryonic development variant
WBGene00003803|F10G8.3|npp-17	280.41	9.74	28.79		373 aa	Seg		COG2319: FOG: WD40 repeat; KOG0647: mRNA export protein (contains WD40 repeats); meNOG04481: Binds mRNA. May function in nucleocytoplasmic transport and in directly or indirectly attaching cytoplasmic mRNPs to the protein	PF00400: WD domain, G-beta repeat	WBPhenotype: Emb; Gro; Hya; Let; Pvl; Rup; Ste; Stp; Unc; pattern of transgene expression variant; receptor mediated endocytosis defective; reduced brood size; transposon silencing variant	NOT WBPheno: Bmd; Variant; phasmid socket absent
WBGene00021785|Y51H7C.7	6445.09	224.08	28.76		133 aa	Seg		KOG4835: DNA-binding protein C1D involved in regulation of double-strand break repair			NOT WBPheno: Bmd; Emb; Gro; Let; Lva; Lvl; Ste; Stp; Variant; postembryonic development variant
WBGene00009085|F23D12.1	6.32	0.22	28.73		259 aa	Tmhmm; Seg					NOT WBPheno: Bmd; Emb; Gro; Lva; Lvl; Ste; Stp; Variant; postembryonic development variant
WBGene00021121|W09G12.7	0.86	0	28.67		433 aa	Seg				WBPhenotype: Sck	NOT WBPheno: Bmd; Emb; Gro; Let; Lva; Lvl; Ste; Stp; Variant; postembryonic development variant
WBGene00013477|Y69E1A.5	0.85	0	28.33		172 aa			KOG3346: Phosphatidylethanolamine binding protein; meNOG09738: Phosphatidylethanolamine-Binding protein	PF01161: Phosphatidylethanolamine-binding protein		NOT WBPheno: Bmd; Emb; Let; Ste; Variant; postembryonic development variant
WBGene00012141|T28F4.6	1.7	0.06	28.33		261 aa	Seg					NOT WBPheno: Bmd; Emb; Gro; Lva; Lvl; Ste; Stp; Variant; postembryonic development variant
WBGene00002190|R07E4.6|kin-2	14.07	0.5	28.14	OMIM:101800 [ACRODYSOSTOSIS WITH HORMONE RESISTANCE; ADOHR]; OMIM:160980 [CARNEY COMPLEX, TYPE 1; CNC1]; OMIM:188550 [THYROID CARCINOMA, PAPILLARY]; OMIM:255960 [MYXOMA, INTRACARDIAC]; OMIM:610489 [PIGMENTED NODULAR ADRENOCORTICAL DISEASE, PRIMARY, 1; PPNAD1]	334-376 aa			COG0664: cAMP-binding proteins - catabolite gene activator and regulatory subunit of cAMP-dependent protein kinases; KOG1113: cAMP-dependent protein kinase types I and II, regulatory subunit; meNOG05089: Protein kinase	PF00027: Cyclic nucleotide-binding domain; PF02197: Regulatory subunit of type II PKA R-subunit	WBPhenotype: Bmd; Dpy; Let; Lva; Lvl; Mlt; Oma; Ste; Stp; Unc; cell secretion variant; pattern of transgene expression variant; transgene subcellular localization variant	NOT WBPheno: Emb; Variant
WBGene00011227|R11.2	1050.05	37.35	28.11		90 aa	SignalP; Seg; Ncoils					NOT WBPheno: Bmd; Emb; Gro; Let; Lva; Lvl; Ste; Stp; Variant; postembryonic development variant
WBGene00006509|Y76A2A.1|tag-164	148.4	5.28	28.11		294 aa	Tmhmm; Seg			PF00635: MSP (Major sperm protein) domain		NOT WBPheno: Bmd; Emb; Let; Ste; Variant; postembryonic development variant
WBGene00020561|T19C3.3	12.93	0.47	27.51		92 aa	Seg		KOG3547: Bestrophin (Best vitelliform macular dystrophy-associated protein)			NOT WBPheno: Bmd; Emb; Gro; Lva; Lvl; Ste; Stp; Variant; embryonic development variant; postembryonic development variant
WBGene00019354|K03B4.2	404.09	14.69	27.51		150 aa	Seg					NOT WBPheno: Bmd; Emb; Gro; Let; Lva; Lvl; Ste; Stp; Variant; postembryonic development variant
WBGene00009688|F44E5.1	2837.3	103.41	27.44		78 aa	Seg; Ncoils				WBPhenotype: Emb; Gro; Lva; Ste; Unc; growth rate variant; nicotine hypersensitive; reduced brood size; small	NOT WBPheno: Bmd; Let; Variant; postembryonic development variant
WBGene00044514|R09E12.9	0.82	0	27.33		128 aa
WBGene00021698|Y48G9A.4|frl-1	0.82	0	27.33		1115 aa	Seg; Ncoils		KOG1923: Rac1 GTPase effector FRL; meNOG06571: Formin-Like protein	PF02181: Formin Homology 2 Domain; PF06367: Diaphanous FH3 Domain; PF06371: Diaphanous GTPase-binding Domain		NOT WBPheno: Bmd; Emb; Ste; Variant
WBGene00015340|C02E7.7	49.6	1.82	27.25		66 aa	SignalP; Seg					NOT WBPheno: Bmd; Emb; Gro; Let; Lva; Lvl; Ste; Stp; Variant; postembryonic development variant
WBGene00009691|F44E5.4	16.28	0.6	27.13		645 aa	Seg; Ncoils		COG0443: Molecular chaperone; KOG0101: Molecular chaperones HSP70/HSC70, HSP70 superfamily	PF00012: Hsp70 protein; PF06723: MreB/Mbl protein		NOT WBPheno: Bmd; Emb; Ste; Variant
WBGene00004490|F37C12.11|rps-21	484.63	17.93	27.03		88 aa			KOG3486: 40S ribosomal protein S21; meNOG21075: Ribosomal protein		WBPhenotype: Emb; Lva; Ste
WBGene00006996|C08B11.1|zyg-11	27.02	1	27.02		799 aa	Seg		KOG3665: ZYG-1-like serine/threonine protein kinases; meNOG11853: Zyg-11 homolog protein		WBPhenotype: Cyk; Emb; Let; Mul; Pvl	NOT WBPheno: protein expression variant
WBGene00017999|F33D4.7	0.81	0	27		111 aa	Tmhmm		KOG4455: Uncharacterized conserved protein; meNOG21037: Annotation not available	PF07019: Rab5-interacting protein (Rab5ip)		NOT WBPheno: Bmd; Emb; Ste; Variant
WBGene00012179|W01D2.1	11617.6	430.56	26.98		92 aa	Seg		COG2126: Ribosomal protein L37E; KOG3475: 60S ribosomal protein L37; meNOG20262: Ribosomal protein L37	PF01907: Ribosomal protein L37e
WBGene00019937|R07E4.3	8.07	0.3	26.9	OMIM:124000 [MITOCHONDRIAL COMPLEX III DEFICIENCY]	90 aa			KOG4116: Ubiquinol cytochrome c reductase, subunit QCR8	PF02939: UcrQ family		NOT WBPheno: Bmd; Emb; Gro; Let; Lva; Lvl; Ste; Stp; Variant; postembryonic development variant
WBGene00017847|F27B3.5	163.76	6.1	26.85		787 aa	Seg; Ncoils		NOG136455: Associated protein; euNOG04694: Centrosomal protein 2 (Centrosomal Nek2-associated protein 1)
WBGene00000144|F15H10.3|apc-10	141.18	5.28	26.74		201 aa			COG5156: Anaphase-promoting complex (APC), subunit 10; KOG3437: Anaphase-promoting complex (APC), subunit 10; meNOG10937: Anaphase-Promoting complex		WBPhenotype: Emb; Lva; Ste; Unc	NOT WBPheno: Bmd; Gro; Let; Lvl; Stp; Variant; postembryonic development variant; protein aggregation variant; transgene subcellular localization variant
WBGene00004451|C54C6.1|rpl-37	2702.46	101.25	26.69		91 aa	Seg		COG2126: Ribosomal protein L37E; KOG3475: 60S ribosomal protein L37; meNOG20262: Ribosomal protein L37	PF01907: Ribosomal protein L37e	WBPhenotype: Lva; Pvl; Ste; small
WBGene00044744|F10G7.12	0.8	0	26.67		93 aa
WBGene00001999|F42A6.7|hrp-1	974.74	36.76	26.52		308-347 aa	Seg		COG0724: RNA-binding proteins (RRM domain); KOG0118: FOG: RRM domain; meNOG09341: Heterogeneous nuclear ribonucleoprotein	PF00076: RNA recognition motif. (a.k.a. RRM, RBD, or RNP domain)	WBPhenotype: Age; Emb; Gro; Let; Lon; Lva; Pvl; Rup; Sck; Ste; cell proliferation increased; excess intestinal cells; fertility reduced; growth variant; late larval arrest; oocyte morphology variant; oogenesis variant; reduced brood size; transgene subcellular localization variant	NOT WBPheno: Bmd; Variant; mRNA surveillance defective
WBGene00001916|F08G2.3|his-42	16.16	0.61	26.49		136 aa			COG2036: Histones H3 and H4; KOG1745: Histones H3 and H4; meNOG18419: Histone H3 protein	PF00125: Core histone H2A/H2B/H3/H4
WBGene00022374|Y94H6A.1|nhr-277	0.79	0	26.33		498 aa	Seg	Walhout_TF	KOG3575: FOG: Hormone receptors	PF00104: Ligand-binding domain of nuclear hormone receptor; PF00105: Zinc finger, C4 type (two domains)		NOT WBPheno: Bmd; Emb; Let; Ste; Variant; postembryonic development variant
WBGene00010466|K01D12.7	0.79	0	26.33		84 aa	Seg
WBGene00001309|M01D7.6|emr-1	0.79	0	26.33		166 aa	Tmhmm; Seg		NOG79478: LEM domain containing 1 protein; euNOG10809: LEM domain containing 1 protein		WBPhenotype: antibody staining reduced	NOT WBPheno: Bmd; Emb; Gro; Let; Lva; Lvl; Ste; Stp; Variant; postembryonic development variant
WBGene00007883|C33A12.4	436.54	16.66	26.2		61 aa						NOT WBPheno: Bmd; Emb; Gro; Let; Lva; Lvl; Ste; Stp; Variant; postembryonic development variant
WBGene00012962|Y48A6B.1	3.12	0.12	26		401 aa	Tmhmm; Seg		meNOG24430: Serpentine Receptor, class W family member srw	PF10324: Serpentine type 7TM GPCR chemoreceptor Srw		NOT WBPheno: Bmd; Emb; Gro; Let; Lva; Lvl; Ste; Stp; Variant; embryonic development variant; postembryonic development variant
WBGene00003469|K05F1.2|msp-142	169.55	6.59	25.73		127 aa				PF00635: MSP (Major sperm protein) domain		NOT WBPheno: Let; Variant; postembryonic development variant
WBGene00017591|F19C7.1	6.09	0.24	25.38		266 aa	SignalP			PF06879: Protein of unknown function (DUF1261)	WBPhenotype: Gro	NOT WBPheno: Adl; Bmd; Emb; Let; Lva; Lvl; Ste; Stp; Variant; postembryonic development variant
WBGene00014181|ZK1010.8	1.01	0.04	25.25		388 aa	Tmhmm; Seg; Ncoils					NOT WBPheno: Bmd; Emb; Gro; Let; Lva; Lvl; Ste; Stp; Variant; embryonic development variant; postembryonic development variant
WBGene00013754|Y113G7B.1|fbxa-116	1.01	0.04	25.25		235-332 aa				PF00646: F-box domain; PF01827: FTH domain		NOT WBPheno: Bmd; Emb; Let; Ste; Variant; postembryonic development variant
WBGene00000420|F56D2.7|ced-6	317.19	12.67	25.03		492 aa	Seg; Ncoils	Gupta_TF	KOG3536: Adaptor protein CED-6, contains PTB domain; meNOG07430: GULP, engulfment adaptor PTB domain containing 1 protein	PF00640: Phosphotyrosine interaction domain (PTB/PID); PF08416: Phosphotyrosine-binding domain	WBPhenotype: Hic; engulfment failure by killer; engulfment variant; levamisole hypersensitive	NOT WBPheno: Bmd; Emb; Gro; Let; Lva; Lvl; Ste; Stp; Variant; anterior pharynx variant; apoptosis increased; embryonic development variant; postembryonic development variant; transgene subcellular localization variant
WBGene00013898|ZC443.3	11.45	0.46	24.89		407 aa	Seg; Ncoils					NOT WBPheno: Bmd; Emb; Gro; Let; Lva; Lvl; Ste; Stp; Variant; postembryonic development variant
WBGene00012998|Y48C3A.20	27.37	1.12	24.44		487 aa	Seg		COG1258: Predicted pseudouridylate synthase; KOG2364: Predicted pseudouridylate synthase; meNOG12073: Responsible for synthesis of pseudouridine from uracil- 55 in the psi GC loop of transfer RNAs protein			NOT WBPheno: Bmd; Emb; Let; Ste; Variant; postembryonic development variant
WBGene00021044|W05H7.1	0.73	0	24.33		131 aa	Seg; Ncoils					NOT WBPheno: Bmd; Emb; Gro; Let; Lva; Lvl; Ste; Stp; Variant; postembryonic development variant
WBGene00005359|T08G3.3|srh-142	0.73	0	24.33		329 aa	Tmhmm; Seg			PF10317: Serpentine type 7TM GPCR chemoreceptor Srd; PF10318: Serpentine type 7TM GPCR chemoreceptor Srh; PF10319: Serpentine type 7TM GPCR chemoreceptor Srj; PF10326: Serpentine type 7TM GPCR chemoreceptor Str; PF10327: Serpentine type 7TM GPCR chemoreceptor Sri		NOT WBPheno: Bmd; Emb; Gro; Lva; Lvl; Ste; Stp; Variant; postembryonic development variant
WBGene00017535|F17A9.3	240.73	9.92	24.27		241 aa	Seg; Ncoils	Thomas+W_TF	KOG3119: Basic region leucine zipper transcription factor; meNOG09509: Thyrotroph embryonic protein	PF00170: bZIP transcription factor; PF07716: Basic region leucine zipper		NOT WBPheno: Bmd; Emb; Let; Ste; Variant; postembryonic development variant
WBGene00006562|K01C8.3|tdc-1	0.97	0.04	24.25	OMIM:608643 [AROMATIC L-AMINO ACID DECARBOXYLASE DEFICIENCY]	650-705 aa	Seg; Ncoils		COG0076: Glutamate decarboxylase and related PLP-dependent proteins; KOG0628: Aromatic-L-amino-acid/L-histidine decarboxylase; meNOG04926: Decarboxylase	PF00282: Pyridoxal-dependent decarboxylase conserved domain	WBPhenotype: Let; Ste; memory retention defective; pheromone suppressed pumping defective	NOT WBPheno: Bmd; Egl D; Emb; Gro; Lva; Lvl; Stp; Variant; associative learning variant; carbon dioxide avoidance variant; fat content variant; foraging reduced; organism starvation response variant; pharyngeal pumping reduced; postembryonic development variant
WBGene00001303|F32D8.6|emo-1	1.94	0.08	24.25		68 aa	Tmhmm; Seg		KOG3498: Preprotein translocase, gamma subunit; meNOG21743: Protein transport protein Sec61 subunit	PF00584: SecE/Sec61-gamma subunits of protein translocation complex	WBPhenotype: Emb; Lva; reduced brood size
WBGene00009716|F44G4.7	58.42	2.42	24.14		408 aa						NOT WBPheno: Bmd; Emb; Gro; Lva; Lvl; Ste; Stp; Variant; postembryonic development variant
WBGene00011397|T03E6.8	25.45	1.06	24.01		341 aa	SignalP; Tmhmm; Seg			PF10318: Serpentine type 7TM GPCR chemoreceptor Srh		NOT WBPheno: Bmd; Emb; Ste; Variant
WBGene00006987|EGAP1.3|zmp-1	15.12	0.63	24		521 aa	SignalP; Seg; Ncoils		KOG1565: Gelatinase A and related matrix metalloproteases; meNOG10633: Matrix metalloproteinase	PF00413: Matrixin; PF01471: Putative peptidoglycan binding domain		NOT WBPheno: Let; Variant; anchor cell invasion variant; postembryonic development variant
WBGene00003771|T19C4.7|nlp-33	109.35	4.58	23.88		74 aa	SignalP; Tmhmm; Seg					NOT WBPheno: Bmd; Emb; Let; Ste; Variant
WBGene00011079|R07B1.7	6.42	0.27	23.78		142 aa	Seg			PF01681: C6 domain
WBGene00004778|K02F2.6|ser-3	8.79	0.37	23.76		610 aa	Tmhmm; Seg		KOG3656: FOG: 7 transmembrane receptor; meNOG09647: Adrenergic receptor	PF00001: 7 transmembrane receptor (rhodopsin family); PF10320: Serpentine type 7TM GPCR chemoreceptor Srsx	WBPhenotype: Ced; Hya; apoptosis increased; locomotion rate serotonin resistant; male tail curling serotonin hypersensitive; pharyngeal pumping reduced; reduced brood size; serotonin induced pumping variant	NOT WBPheno: Bmd; Egl; Emb; Gro; Let; Lva; Lvl; Ste; Stp; Unc; Variant; egg laying serotonin variant; glp; postembryonic development variant
WBGene00044548|R13D7.11|cnc-9	0.71	0	23.67		78 aa	SignalP; Tmhmm; Seg
WBGene00022295|Y76B12C.1	0.71	0	23.67	OMIM:216900 [ACHROMATOPSIA 2; ACHM2]; OMIM:613756 [RETINITIS PIGMENTOSA 49; RP49]	832 aa	Tmhmm; Seg		KOG0500: Cyclic nucleotide-gated cation channel CNGA1-3 and related proteins; meNOG05734: Cyclic-Nucleotide gated protein	PF00027: Cyclic nucleotide-binding domain	WBPhenotype: Let; Ste	NOT WBPheno: Bmd; Emb; Gro; Lva; Lvl; Stp; Variant; postembryonic development variant
WBGene00021427|Y38F2AR.9	0.71	0	23.67		81 aa	Tmhmm; Seg		KOG3457: Sec61 protein translocation complex, beta subunit; meNOG21336: Protein transport protein Sec61 subunit	PF03911: Sec61beta family		NOT WBPheno: Bmd; Emb; Ste; Variant
WBGene00020510|T14G11.1	0.71	0	23.67		281 aa	Tmhmm; Seg					NOT WBPheno: Bmd; Emb; Gro; Let; Lva; Lvl; Ste; Stp; Variant; postembryonic development variant
WBGene00004314|Y54F10AM.10|rbc-2	0.71	0	23.67	OMIM:613211 [AMELOGENESIS IMPERFECTA, HYPOMATURATION TYPE, IIA3; AI2A3]	1322 aa	Seg		KOG4155: FOG: WD40 repeat; meNOG05608: WD repeat protein 7 (TGF-beta resistance-associated protein TRAG)	PF00400: WD domain, G-beta repeat		NOT WBPheno: Bmd; Emb; Ste; Variant
WBGene00003290|T07C5.6|mir-62	11.79	0.5	23.58
WBGene00015067|B0238.1	33.39	1.42	23.51	OMIM:114835 [CARBOXYLESTERASE 1; CES1]	545 aa	Seg		COG2272: Carboxylesterase type B; KOG1516: Carboxylesterase and related proteins; meNOG11887: Carboxylesterase	PF00135: Carboxylesterase; PF07859: alpha/beta hydrolase fold		NOT WBPheno: Bmd; Emb; Let; Ste; Variant; postembryonic development variant
WBGene00006730|F39B2.2|uev-1	1.64	0.07	23.43		139 aa	Seg		COG5078: Ubiquitin-protein ligase; KOG0896: Ubiquitin-conjugating enzyme E2; meNOG07553: Ubiquitin protein	PF00179: Ubiquitin-conjugating enzyme		NOT WBPheno: Bmd; Emb; Gro; Let; Lva; Lvl; Ste; Stp; Variant; postembryonic development variant; protein aggregation variant; transgene subcellular localization variant
WBGene00017197|F07C3.9	0.7	0	23.33		53 aa	Tmhmm					NOT WBPheno: Bmd; Emb; Gro; Lva; Lvl; Ste; Stp; Variant; postembryonic development variant
WBGene00016129|C26B2.7	0.7	0	23.33		135 aa	Tmhmm					NOT WBPheno: Bmd; Emb; Let; Ste; Variant; postembryonic development variant
WBGene00007062|Y59A8B.9|ebp-3	0.7	0	23.33		187 aa	Seg; Ncoils		KOG3000: Microtubule-binding protein involved in cell cycle control	PF03271: EB1-like C-terminal motif
WBGene00003720|T01G6.8|nhr-130	0.7	0	23.33		440 aa	Seg	Walhout_TF	KOG3575: FOG: Hormone receptors	PF00104: Ligand-binding domain of nuclear hormone receptor; PF00105: Zinc finger, C4 type (two domains)		NOT WBPheno: Bmd; Emb; Gro; Lva; Lvl; Ste; Stp; Variant; postembryonic development variant
WBGene00001490|H05G16.1|frm-3	0.93	0.04	23.25	OMIM:310700 [NYSTAGMUS 1, CONGENITAL, X-LINKED; NYS1]	1091 aa	Seg		KOG3531: Rho guanine nucleotide exchange factor CDEP; meNOG04891: Domain-Containing protein	PF00373: FERM central domain; PF08736: FERM adjacent (FA); PF09379: FERM N-terminal domain; PF09380: FERM C-terminal PH-like domain		NOT WBPheno: Bmd; Emb; Gro; Let; Lva; Lvl; Ste; Stp; Variant; postembryonic development variant
WBGene00006068|Y71H9A.2|sto-6	9.44	0.41	23.02		298 aa	Tmhmm; Seg		COG0330: Membrane protease subunits, stomatin/prohibitin homologs; KOG2621: Prohibitins and stomatins of the PID superfamily; meNOG06651: Erythrocyte band 7 integral membrane protein	PF01145: SPFH domain / Band 7 family		NOT WBPheno: Bmd; Emb; Let; Mec; Ste; Unc; Variant; development variant; growth variant; postembryonic development variant; synaptogenesis variant
WBGene00001228|B0511.10|eif-3.E	1.61	0.07	23		432 aa	Seg		KOG2758: Translation initiation factor 3, subunit e (eIF-3e); meNOG04059: Eukaryotic translation initiation factor 3 subunit	PF01399: PCI domain; PF09440: eIF3 subunit 6 N terminal domain	WBPhenotype: Emb; Lva; Lvl; Pvl; Ste; pattern of transgene expression variant; protein aggregation variant; receptor mediated endocytosis defective; transgene expression increased; transgene subcellular localization variant
WBGene00000403|B0034.3|casy-1	1.61	0.07	23		160-984 aa	SignalP; Tmhmm; Seg		KOG1834: Calsyntenin; meNOG04004: Calsyntenin protein	PF00028: Cadherin domain	WBPhenotype: Emb; associative learning variant	NOT WBPheno: Bmd; Gro; Let; Lva; Lvl; Sck; Ste; Stp; Unc; Variant; aldicarb response variant; diacetyl chemotaxis defective; isoamyl alcohol chemotaxis defective; isothermal tracking behavior variant; levamisole response variant; morphology variant; nonanone chemotaxis defective; odorant adaptation variant; pattern protein expression variant; postembryonic development variant; presynaptic vesicle…
WBGene00045277|ZK742.6	0.68	0	22.67		54 aa	Seg
WBGene00019428|K06A1.6|dgk-5	0.68	0	22.67		937 aa	Seg		KOG0782: Predicted diacylglycerol kinase; meNOG04953: Diacylglycerol kinase	PF00130: Phorbol esters/diacylglycerol binding domain (C1 domain); PF00609: Diacylglycerol kinase accessory domain; PF00781: Diacylglycerol kinase catalytic domain		NOT WBPheno: Bmd; Emb; Gro; Lva; Lvl; Ste; Stp; Variant; postembryonic development variant
WBGene00017840|F26G1.4|ttm-2	0.68	0	22.67		358 aa	Seg			PF00339: Arrestin (or S-antigen), N-terminal domain		NOT WBPheno: Bmd; Emb; Gro; Let; Lva; Lvl; Ste; Stp; Variant; postembryonic development variant
WBGene00019080|F59A3.7	5.66	0.25	22.64		198 aa	Tmhmm; Seg
WBGene00004057|F42G8.4|pmk-3	15.71	0.7	22.44		474 aa	Seg; Ncoils		COG0515: Serine/threonine protein kinase; KOG0660: Mitogen-activated protein kinase; meNOG04014: Mitogen-Activated protein kinase	PF00069: Protein kinase domain; PF07714: Protein tyrosine kinase	WBPhenotype: Ced; apoptosis increased; body wall muscle myosin organization defective	NOT WBPheno: Bmd; Dyf; Emb; Gro; Let; Lva; Lvl; Ste; Stp; Variant; brood size variant; growth variant; postembryonic development variant; protein aggregation variant; transgene expression reduced; transgene subcellular localization variant
WBGene00001088|ZK863.6|dpy-30	1750.47	78	22.44		123 aa	Seg		KOG4109: Histone H3 (Lys4) methyltransferase complex, subunit CPS25/DPY-30; meNOG20430: Protein dpy-30	PF05186: Dpy-30 motif	WBPhenotype: Bmd; Dpy; Emb; Gro; Lvl; Muv; Slu; Ste; ectopic expression transgene	NOT WBPheno: Let; Variant; postembryonic development variant
WBGene00020397|T10B11.1|pcbd-1	0.67	0	22.33	OMIM:264070 [HYPERPHENYLALANINEMIA, BH4-DEFICIENT, D; HPABH4D]	142 aa			COG2154: Pterin-4a-carbinolamine dehydratase; KOG4073: Pterin carbinolamine dehydratase PCBD/dimerization cofactor of HNF1; meNOG19676: Pterin-4-Alpha-Carbinolamine dehydratase (EC 4.2.1.96)	PF01329: Pterin 4 alpha carbinolamine dehydratase	WBPhenotype: body wall muscle myosin organization defective	NOT WBPheno: Bmd; Emb; Gro; Let; Lva; Lvl; Ste; Stp; Variant; postembryonic development variant
WBGene00006198|T03E6.1|str-151	0.67	0	22.33		334 aa	Tmhmm; Seg			PF10317: Serpentine type 7TM GPCR chemoreceptor Srd; PF10318: Serpentine type 7TM GPCR chemoreceptor Srh; PF10319: Serpentine type 7TM GPCR chemoreceptor Srj; PF10326: Serpentine type 7TM GPCR chemoreceptor Str		NOT WBPheno: Let; Variant; postembryonic development variant
WBGene00017129|E04F6.10	106.2	4.76	22.31		100 aa	Tmhmm					NOT WBPheno: Bmd; Emb; Gro; Let; Lva; Lvl; Ste; Stp; Variant; postembryonic development variant
WBGene00022236|Y73B6BL.12	0.66	0	22		228 aa	Seg		COG0526: Thiol-disulfide isomerase and thioredoxins; KOG0191: Thioredoxin/protein disulfide isomerase; meNOG05559: Homolog, subfamily C, member 10 protein	PF00085: Thioredoxin		NOT WBPheno: Emb; Gro; Lva; Lvl; Ste; Stp; Variant; postembryonic development variant
WBGene00011860|T20D3.8	0.66	0	22		282 aa	Tmhmm; Seg		KOG3059: N-acetylglucosaminyltransferase complex, subunit PIG-C/GPI2, required for phosphatidylinositol biosynthesis; meNOG07661: Phosphatidylinositol protein	PF06432: Phosphatidylinositol N-acetylglucosaminyltransferase		NOT WBPheno: Bmd; Emb; Gro; Let; Lva; Lvl; Ste; Stp; Variant; postembryonic development variant
WBGene00001693|T01B10.1|grd-4	8.58	0.39	22	OMIM:120200 [COLOBOMA, OCULAR]; OMIM:142945 [HOLOPROSENCEPHALY 3; HPE3]; OMIM:147250 [SOLITARY MEDIAN MAXILLARY CENTRAL INCISOR; SMMCI]; OMIM:174500 [POLYDACTYLY, PREAXIAL II; PPD2]; OMIM:269160 [SCHIZENCEPHALY]; OMIM:611638 [MICROPHTHALMIA, ISOLATED, WITH COLOBOMA 5; MCOPCB5]	169 aa	SignalP			PF04155: Ground-like domain	WBPhenotype: Mlt; Unc; alae secretion variant; body vacuole; breaks in alae; intestinal vacuole; multiple alae; small	NOT WBPheno: Bmd; Emb; Gro; Let; Lva; Lvl; Ste; Stp; Variant; postembryonic development variant
WBGene00008754|F13E9.5	24.18	1.1	21.98		318 aa	Seg; Ncoils					NOT WBPheno: Bmd; Emb; Ste; Variant
WBGene00016628|C44B7.6	12.23	0.56	21.84	OMIM:138500 [HYPERGLYCINURIA]; OMIM:242600 [IMINOGLYCINURIA]	434-489 aa	Tmhmm; Seg		COG0814: Amino acid permeases; KOG1304: Amino acid transporters; meNOG05979: Amino acid protein	PF01490: Transmembrane amino acid transporter protein		NOT WBPheno: Let; Variant; postembryonic development variant
WBGene00010944|M176.5	57.2	2.64	21.67		211 aa	SignalP; Seg					NOT WBPheno: Bmd; Emb; Ste; Variant
WBGene00013241|Y56A3A.29|ung-1	408.54	18.9	21.62	OMIM:608106 [IMMUNODEFICIENCY WITH HYPER-IgM, TYPE 5; HIGM5]	95-282 aa	Seg		COG0692: Uracil DNA glycosylase; KOG2994: Uracil DNA glycosylase; meNOG09771: Excises uracil residues from the DNA which can arise as a result of misincorporation of dUMP residues by DNA polymerase or due to deamination of	PF03167: Uracil DNA glycosylase superfamily	WBPhenotype: enzyme activity reduced; resistant to mutagens; spontaneous mutation rate increased	NOT WBPheno: Age; Bmd; Egl; Emb; Gro; Let; Lva; Lvl; Ste; Stp; Variant; development variant; postembryonic development variant
WBGene00017180|F02E11.2	0.86	0.04	21.5		87-93 aa	SignalP; Tmhmm					NOT WBPheno: Bmd; Emb; Ste; Variant
WBGene00003714|C17E7.8|nhr-124	0.86	0.04	21.5		376-377 aa	Seg	Walhout_TF		PF00104: Ligand-binding domain of nuclear hormone receptor; PF00105: Zinc finger, C4 type (two domains)		NOT WBPheno: Bmd; Emb; Gro; Let; Lva; Lvl; Ste; Stp; Variant; postembryonic development variant
WBGene00015205|B0495.6	0.64	0	21.33		87 aa			KOG3485: Uncharacterized conserved protein		WBPhenotype: Emb; Lva; Pvl; Ste; pattern of transgene expression variant; receptor mediated endocytosis defective; reduced brood size	NOT WBPheno: Bmd; Let; Variant; postembryonic development variant; transgene subcellular localization variant
WBGene00009579|F40F8.8|arrd-6	0.64	0	21.33		442-469 aa	Seg		KOG3780: Thioredoxin binding protein TBP-2/VDUP1; meNOG10165: Arrestin domain containing protein	PF00339: Arrestin (or S-antigen), N-terminal domain; PF02752: Arrestin (or S-antigen), C-terminal domain		NOT WBPheno: Bmd; Emb; Gro; Let; Lva; Lvl; Ste; Stp; Variant; postembryonic development variant
WBGene00017496|F15E11.10|srbc-15	4.9	0.23	21.3		286 aa	SignalP; Tmhmm; Seg					NOT WBPheno: Bmd; Emb; Gro; Lva; Lvl; Ste; Stp; Variant; postembryonic development variant
WBGene00019521|K08B12.2|dmd-7	36.44	1.72	21.19		86-449 aa	Seg	Thomas+W_TF	KOG3815: Transcription factor Doublesex	PF00751: DM DNA binding domain		NOT WBPheno: Bmd; Emb; Let; Ste; Variant
WBGene00009818|F47B10.7|acbp-3	0.63	0	21		116 aa			COG4281: Acyl-CoA-binding protein; KOG0817: Acyl-CoA-binding protein; meNOG08460: Binding domain-containing protein	PF00887: Acyl CoA binding protein		NOT WBPheno: Bmd; Emb; Gro; Let; Lva; Lvl; Ste; Stp; Variant; postembryonic development variant
WBGene00002092|C06E2.8|ins-9	0.63	0	21		118 aa	SignalP; Seg			PF03488: Nematode insulin-related peptide beta type		NOT WBPheno: Dpy; Let; Lon; Pvl; Unc; small
WBGene00008860|F15D4.3|rmo-1	2.72	0.13	20.92		82 aa	Tmhmm; Seg		KOG4096: Uncharacterized conserved protein; meNOG21151: Protein involved in positive regulation of oxygen and reactive oxygen species metabolic process		WBPhenotype: Let; Ste	NOT WBPheno: Bmd; Emb; Variant
WBGene00006960|F02D8.3|xbx-1	1.67	0.08	20.88		370 aa	Seg; Ncoils		KOG3929: Uncharacterized conserved protein; meNOG09555: 2 light intermediate chain protein	PF05783: Dynein light intermediate chain (DLIC)		NOT WBPheno: Bmd; Emb; Let; Ste; Variant; postembryonic development variant
WBGene00004145|T03G11.1|pqn-62	8.98	0.43	20.88		1256 aa	Seg; Ncoils			PF02037: SAP domain		NOT WBPheno: Bmd; Emb; Gro; Lva; Lvl; Ste; Stp; Variant; postembryonic development variant
WBGene00000274|F15D4.1|btf-1	7.71	0.37	20.84		1649 aa	Seg		COG0553: Superfamily II DNA/RNA helicases, SNF2 family; KOG0392: SNF2 family DNA-dependent ATPase domain-containing protein; meNOG04521: Tata-Binding protein-associated factor 172 EC 3.6.1	PF00176: SNF2 family N-terminal domain; PF00271: Helicase conserved C-terminal domain; PF12054: Domain of unknown function (DUF3535)		NOT WBPheno: Bmd; Emb; Gro; Let; Lva; Lvl; Ste; Stp; Variant; organism UV hypersensitive; postembryonic development variant
WBGene00021803|Y53G8AM.2	23.31	1.13	20.63		73 aa	SignalP; Seg
WBGene00044679|K02B12.9	11.48	0.56	20.5		118 aa	SignalP; Seg
WBGene00010717|K09C8.7	13.94	0.68	20.5		97 aa	SignalP
WBGene00018376|F43C9.2	1475.3	72	20.49		159 aa			COG5126: Ca2+-binding protein (EF-Hand superfamily); KOG0027: Calmodulin and related proteins (EF-Hand superfamily)	PF00036: EF hand
WBGene00000800|Y23H5A.7|cars-1	5.5	0.27	20.37		908-909 aa	Seg; Ncoils		COG0215: Cysteinyl-tRNA synthetase; KOG2007: Cysteinyl-tRNA synthetase; meNOG05461: Cysteinyl trna synthetase	PF01406: tRNA synthetases class I (C) catalytic domain	WBPhenotype: Emb; Gro; Lva; Lvl; Mlt	NOT WBPheno: Bmd; Ste; Variant
WBGene00011516|T06C12.9	0.61	0	20.33		91 aa	Tmhmm; Seg		KOG1773: Stress responsive protein	PF01679: Uncharacterized protein family UPF0057		NOT WBPheno: Bmd; Emb; Gro; Let; Lva; Lvl; Ste; Stp; Variant; postembryonic development variant
WBGene00011499|T05G5.4	4.26	0.21	20.29		146 aa	SignalP; Tmhmm				WBPhenotype: Emb; Gro	NOT WBPheno: Bmd; Egl D; Let; Lva; Lvl; Ste; Stp; Variant; anoxia hypersensitive; embryonic development variant; postembryonic development variant
WBGene00019257|H32C10.3	17.51	0.87	20.13		783 aa	SignalP; Tmhmm; Seg; Ncoils	Walhout_TF	COG0666: FOG: Ankyrin repeat; COG5273: Uncharacterized protein containing DHHC-type Zn finger; KOG0509: Ankyrin repeat and DHHC-type Zn-finger domain containing proteins; meNOG07182: Zinc finger protein	PF00023: Ankyrin repeat; PF01529: DHHC zinc finger domain
WBGene00021519|Y41D4B.17	1.61	0.08	20.12		400 aa	SignalP; Seg			PF03409: Transmembrane glycoprotein		NOT WBPheno: Bmd; Emb; Gro; Let; Lva; Lvl; Ste; Stp; Variant; postembryonic development variant
WBGene00044008|C45G3.5	8	0.4	20		642 aa	Seg; Ncoils		KOG3159: Lipoate-protein ligase A
WBGene00021283|Y24D9A.5	0.6	0	20		282 aa	Seg					NOT WBPheno: Bmd; Emb; Gro; Let; Lva; Lvl; Ste; Stp; Variant; postembryonic development variant
WBGene00004340|F31E3.3|rfc-4	13.2	0.66	20		334 aa	Seg		COG0470: ATPase involved in DNA replication; KOG0989: Replication factor C, subunit RFC4; meNOG06364: 37 kDa subunit (RF-C 37 kDa subunit) (RFC37)	PF00004: ATPase family associated with various cellular activities (AAA); PF03215: Rad17 cell cycle checkpoint protein; PF05496: Holliday junction DNA helicase ruvB N-terminus; PF07728: AAA domain (dynein-related subfamily)	WBPhenotype: Cyk; Emb; Gro; Mul; Stp	NOT WBPheno: glp
WBGene00003733|F57C7.2|nhx-5	0.6	0	20	OMIM:300243 [MENTAL RETARDATION, X-LINKED, SYNDROMIC, CHRISTIANSON TYPE; MRXSCH]; OMIM:613410 [AUTISM, SUSCEPTIBILITY TO, 16; AUTS16]	611-630 aa	SignalP; Tmhmm; Seg		COG0025: NhaP-type Na+/H+ and K+/H+ antiporters; KOG1965: Sodium/hydrogen exchanger protein; meNOG04866: Sodium/Hydrogen exchanger protein	PF00999: Sodium/hydrogen exchanger family		NOT WBPheno: Bmd; Emb; Gro; Let; Lva; Lvl; Ste; Stp; Variant; postembryonic development variant
WBGene00015925|C17H11.5	5.79	0.29	19.97		112 aa						NOT WBPheno: Bmd; Emb; Gro; Let; Lva; Lvl; Ste; Stp; Variant; postembryonic development variant
WBGene00050913|T12B5.14	147.57	7.43	19.86		110 aa	Tmhmm; Seg
WBGene00018317|F41H10.4	10.52	0.53	19.85		575 aa	Seg; Ncoils		NOG150073: Annotation not available			NOT WBPheno: Emb; Gro; Lva; Lvl; Ste; Stp; Variant; postembryonic development variant
WBGene00022580|ZC262.3	173.06	8.73	19.82		624-773 aa	SignalP; Tmhmm; Seg		KOG0619: FOG: Leucine rich repeat; meNOG24325: Annotation not available			NOT WBPheno: Bmd; Emb; Gro; Lva; Lvl; Ste; Stp; Variant; embryonic development variant; postembryonic development variant
WBGene00019630|K10D2.4|apc-16	1025.19	51.75	19.81		81 aa					WBPhenotype: Emb; nuclear appearance variant	NOT WBPheno: Let; Variant; embryonic development variant; postembryonic development variant
WBGene00020019|R12B2.3	97.25	4.92	19.77		220 aa	Seg
WBGene00008128|C47A10.6|srab-12	0.59	0	19.67		346 aa	Tmhmm; Seg			PF02117: Serpentine type 7TM GPCR chemoreceptor Sra; PF02175: Serpentine type 7TM GPCR chemoreceptor Srb; PF03125: C. elegans Sre G protein-coupled chemoreceptor; PF10292: Serpentine type 7TM GPCR receptor class ab chemoreceptor		NOT WBPheno: Bmd; Emb; Let; Ste; Variant; postembryonic development variant
WBGene00016564|C41D11.5	257.19	13.11	19.62		238 aa	Seg					NOT WBPheno: Bmd; Emb; Ste; Variant
WBGene00018073|F35H10.10	10.33	0.53	19.49		1404 aa	SignalP; Tmhmm; Seg		KOG1056: Glutamate-gated metabotropic ion channel receptor subunit GRM2 and related subunits, G-protein coupled receptor superfamily; meNOG05729: Glutamate protein	PF00003: 7 transmembrane sweet-taste receptor of 3 GCPR		NOT WBPheno: Bmd; Emb; Gro; Let; Lva; Lvl; Ste; Stp; Variant; postembryonic development variant
WBGene00017760|F23H11.4	79.4	4.08	19.46		598-1003 aa	Seg		KOG1117: Rho- and Arf-GTPase activating protein ARAP3; meNOG29613: Gtpase-Activator protein for Rho-like GTPases	PF00620: RhoGAP domain	WBPhenotype: Emb; Ric	NOT WBPheno: Bmd; Gro; Lva; Lvl; Ste; Stp; Variant; embryonic development variant; postembryonic development variant
WBGene00044686|W07E11.4|flp-28	169.94	8.76	19.4		71 aa	SignalP; Tmhmm; Seg
WBGene00010769|K11D2.2|asah-1	194.31	10.03	19.37	OMIM:228000 [FARBER LIPOGRANULOMATOSIS]	393 aa	SignalP; Seg		NOG84249: N-Acylsphingosine amidohydrolase; euNOG04708: N-Acylsphingosine amidohydrolase; meNOG05005: N-Acylsphingosine amidohydrolase	PF02275: Linear amide C-N hydrolases, choloylglycine hydrolase family	WBPhenotype: Age	NOT WBPheno: Bmd; Emb; Gro; Let; Lva; Lvl; Ste; Stp; Variant; postembryonic development variant
WBGene00016493|C37A2.7	1121.85	58.04	19.33		107 aa	Seg		KOG3449: 60S acidic ribosomal protein P2; meNOG21849: Ribosomal protein	PF00428: 60s Acidic ribosomal protein	WBPhenotype: Emb; Gro; organism development variant; transgene induced cosuppression variant	NOT WBPheno: Bmd; Let; Ste; Variant; postembryonic development variant
WBGene00009191|F27D4.7	167.12	8.65	19.32		162 aa	Tmhmm; Seg		KOG2887: Membrane protein involved in ER to Golgi transport; meNOG18709: Transport protein
WBGene00020341|T08B1.4	21.79	1.13	19.28		161-342 aa	SignalP; Seg		KOG4569: Predicted lipase	PF01764: Lipase (class 3)	WBPhenotype: Ric	NOT WBPheno: Emb; Gro; Lva; Lvl; Ste; Stp; Variant; postembryonic development variant
WBGene00022337|Y82E9BR.4	41.19	2.14	19.25		328 aa	Seg; Ncoils					NOT WBPheno: Bmd; Emb; Ste; Variant
WBGene00012648|Y39A1A.9	7.11	0.37	19.22		465 aa	Seg; Ncoils		NOG67714: Annotation not available; euNOG23331: Annotation not available; meNOG29778: Annotation not available			NOT WBPheno: Bmd; Emb; Gro; Lva; Lvl; Ste; Stp; Variant; postembryonic development variant
WBGene00003752|D1009.4|nlp-14	106.87	5.56	19.22		224 aa	SignalP; Seg					NOT WBPheno: Age; Bmd; Emb; Gro; Let; Lva; Lvl; Ste; Stp; Variant; postembryonic development variant
WBGene00077557|F15D3.9	0.57	0	19		81 aa						NOT WBPheno: Bmd; Emb; Ste; Variant
WBGene00020385|T09D3.4|nhr-216	0.57	0	19		427 aa	Seg	Walhout_TF	KOG3575: FOG: Hormone receptors	PF00104: Ligand-binding domain of nuclear hormone receptor; PF00105: Zinc finger, C4 type (two domains)		NOT WBPheno: Bmd; Emb; Gro; Let; Lva; Lvl; Ste; Stp; Variant; postembryonic development variant
WBGene00015124|B0303.2	0.57	0	19		273 aa			NOG71857: N-Methyltransferase; euNOG06999: N-Methyltransferase; meNOG15070: N-Methyltransferase	PF01234: NNMT/PNMT/TEMT family		NOT WBPheno: Bmd; Emb; Let; Ste; Variant; embryonic development variant; postembryonic development variant
WBGene00011888|T21B10.6|cutl-15	551.61	29.12	18.94		385 aa	SignalP; Tmhmm; Seg			PF00100: Zona pellucida-like domain		NOT WBPheno: Bmd; Emb; Gro; Let; Lva; Lvl; Ste; Stp; Variant; postembryonic development variant
WBGene00009505|F37B12.3	13.19	0.7	18.84		226 aa	SignalP; Tmhmm		KOG2818: Predicted undecaprenyl diphosphate synthase; meNOG08692: Nogo-B receptor		WBPhenotype: Clr; Emb; Lva; Pch; Unc; fat content reduced	NOT WBPheno: Bmd; Ste; Variant; fat content variant
WBGene00020839|T27A3.2	11.07	0.59	18.76		789 aa	Seg		COG5207: Isopeptidase T; KOG0944: Ubiquitin-specific protease UBP14; meNOG05318: Ubiquitin protein	PF00443: Ubiquitin carboxyl-terminal hydrolase; PF00627: UBA/TS-N domain; PF02148: Zn-finger in ubiquitin-hydrolases and other protein	WBPhenotype: Gro; Let; Pvl; Slu; Ste; Stp; Unc	NOT WBPheno: Adl; Bmd; Emb; Lva; Lvl; Variant; postembryonic development variant; protein aggregation variant; transgene subcellular localization variant
WBGene00006450|C28C12.10|tag-77	1.87	0.1	18.7	OMIM:305400 [AARSKOG-SCOTT SYNDROME; AAS]; OMIM:609311 [CHARCOT-MARIE-TOOTH DISEASE, TYPE 4H; CMT4H]	1004 aa	Seg; Ncoils		KOG1729: FYVE finger containing protein; meNOG10026: FYVE, RhoGEF and PH domain-containing protein 6	PF00169: PH domain; PF00621: RhoGEF domain; PF01363: FYVE zinc finger	WBPhenotype: Ste	NOT WBPheno: Bmd; Emb; Gro; Let; Lva; Lvl; Stp; Variant; accumulated cell corpses; cell corpse degradation variant; coelomocyte uptake defective; copper hypersensitive; postembryonic development variant
WBGene00014140|ZK899.1	207.76	11.17	18.6		161 aa	Seg					NOT WBPheno: Bmd; Emb; Gro; Lva; Lvl; Ste; Stp; Variant; postembryonic development variant
WBGene00001887|ZK131.7|his-13	31.5	1.7	18.53		136 aa			COG2036: Histones H3 and H4; KOG1745: Histones H3 and H4; meNOG18419: Histone H3 protein	PF00125: Core histone H2A/H2B/H3/H4
WBGene00001883|ZK131.3|his-9	31.5	1.7	18.53		136 aa			COG2036: Histones H3 and H4; KOG1745: Histones H3 and H4; meNOG18419: Histone H3 protein	PF00125: Core histone H2A/H2B/H3/H4	WBPhenotype: Emb; Lva; reduced brood size
WBGene00012002|T24H10.4	5.27	0.29	18.17		337 aa	SignalP		KOG2521: Uncharacterized conserved protein; meNOG14511: Annotation not available	PF05705: Eukaryotic protein of unknown function (DUF829)		NOT WBPheno: Bmd; Emb; Gro; Let; Lva; Lvl; Ste; Stp; Variant; postembryonic development variant
WBGene00019609|K10B3.1	53.9	2.97	18.15		73-76 aa			KOG4118: Uncharacterized conserved protein; meNOG21769: Zinc finger protein			NOT WBPheno: Bmd; Emb; Gro; Let; Lva; Lvl; Ste; Stp; Variant; postembryonic development variant
WBGene00017462|F14D2.14	518.38	28.69	18.07		180 aa	Seg					NOT WBPheno: Let; Variant; postembryonic development variant
WBGene00001860|F28B3.7|him-1	95.56	5.31	18	OMIM:300590 [CORNELIA DE LANGE SYNDROME 2; CDLS2]	140-1262 aa	Seg; Ncoils		COG1196: Chromosome segregation ATPases; KOG0018: Structural maintenance of chromosome protein 1 (sister chromatid cohesion complex Cohesin, subunit SMC1); meNOG04618: Chromosome protein	PF02463: RecF/RecN/SMC N terminal domain; PF06470: SMC proteins Flexible Hinge Domain	WBPhenotype: DNA recombination variant; Emb; Him; Lva; Lvl; Pvl; Ste; Unc; XXX progeny; antibody staining reduced; antibody subcellular localization variant; chromosome morphology variant; male fertility reduced; organism UV response variant; organism hypersensitive X ray irradiation; pattern of transgene expression variant; receptor mediated endocytosis defective; reduced brood size; reproductiv…	NOT WBPheno: Bmd; Cod; Gro; Stp; Variant; behavior variant; morphology variant; nullo X gamete; postembryonic development variant; spermatogenesis variant
WBGene00002078|ZK742.1|xpo-1	12.5	0.7	17.86		79-1080 aa	Seg		COG5101: Importin beta-related nuclear transport receptor; KOG2020: Nuclear transport receptor CRM1/MSN5 (importin beta superfamily); meNOG05804: Exportin-1 protein	PF03810: Importin-beta N-terminal domain; PF08389: Exportin 1-like protein; PF08767: CRM1 C terminal	WBPhenotype: Bmd; Emb; Gro; Lva; Lvl; Unc; intestinal development variant; pattern protein expression variant; protein subcellular localization variant
WBGene00016083|C25A8.2	44.61	2.5	17.84		149 aa	SignalP; Tmhmm; Seg					NOT WBPheno: Bmd; Emb; Let; Ste; Variant; postembryonic development variant
WBGene00010041|F54C9.3	28.98	1.63	17.78		81 aa	Seg					NOT WBPheno: Bmd; Emb; Gro; Let; Lva; Lvl; Ste; Stp; Variant; postembryonic development variant
WBGene00005662|W03B1.4|sars-2	0.71	0.04	17.75	OMIM:613845 [HYPERURICEMIA, PULMONARY HYPERTENSION, RENAL FAILURE, AND ALKALOSIS]	441 aa	Seg		COG0172: Seryl-tRNA synthetase; KOG2509: Seryl-tRNA synthetase; meNOG07446: Seryl trna protein	PF00587: tRNA synthetase class II core domain (G, H, P, S and T)	WBPhenotype: Clr; Gro; pattern of transgene expression variant; receptor mediated endocytosis defective	NOT WBPheno: Let; Variant; postembryonic development variant
WBGene00003678|K08A2.5|nhr-88	0.71	0.04	17.75	OMIM:125850 [MATURITY-ONSET DIABETES OF THE YOUNG, TYPE 1; MODY1]; OMIM:125853 [DIABETES MELLITUS, NONINSULIN-DEPENDENT; NIDDM]; OMIM:606391 [MATURITY-ONSET DIABETES OF THE YOUNG; MODY]	235-593 aa	Seg	Walhout_TF	KOG3575: FOG: Hormone receptors	PF00104: Ligand-binding domain of nuclear hormone receptor; PF00105: Zinc finger, C4 type (two domains)		NOT WBPheno: Bmd; Emb; Gro; Lva; Lvl; Ste; Stp; Variant; embryonic development variant; postembryonic development variant
WBGene00045275|F18E3.12	15.43	0.87	17.74		89 aa
WBGene00001660|C34E10.3|gop-1	1.24	0.07	17.71		892 aa	Seg		KOG2219: Uncharacterized conserved protein; meNOG04269: Annotation not available	PF09758: Uncharacterised conserved protein		NOT WBPheno: Bmd; Emb; Gro; Let; Lva; Lvl; Ste; Stp; Variant; embryonic development variant; postembryonic development variant
WBGene00001453|T06C10.4|flp-10	74.42	4.25	17.51		67 aa	SignalP; Tmhmm; Seg					NOT WBPheno: Bmd; Egl; Emb; Gro; Let; Lva; Lvl; Ste; Stp; Variant; postembryonic development variant
WBGene00044445|C02F5.14	32.14	1.84	17.47		107 aa	SignalP; Seg
WBGene00022144|Y71G12B.4|pghm-1	687.12	39.45	17.42		324 aa	SignalP		KOG3567: Peptidylglycine alpha-amidating monooxygenase; meNOG29245: Hydroxylating monooxygenase	PF01082: Copper type II ascorbate-dependent monooxygenase, N-terminal domain; PF03712: Copper type II ascorbate-dependent monooxygenase, C-terminal domain	WBPhenotype: Age	NOT WBPheno: Bmd; Emb; Gro; Let; Lva; Lvl; Ste; Stp; Variant; postembryonic development variant
WBGene00021906|Y55B1AR.2	3.48	0.2	17.4		456-573 aa	Seg; Ncoils					NOT WBPheno: Bmd; Emb; Gro; Let; Lva; Lvl; Ste; Stp; Variant; postembryonic development variant
WBGene00001933|F55G1.2|his-59	1.91	0.11	17.36		136 aa			COG2036: Histones H3 and H4; KOG1745: Histones H3 and H4; meNOG18419: Histone H3 protein	PF00125: Core histone H2A/H2B/H3/H4	WBPhenotype: Emb	NOT WBPheno: Bmd; Ste; Variant
WBGene00018855|F55A4.3	0.52	0	17.33		70 aa	Tmhmm					NOT WBPheno: Bmd; Emb; Gro; Let; Lva; Lvl; Ste; Stp; Variant; postembryonic development variant
WBGene00008005|C38D4.4	0.52	0	17.33		556 aa	Seg					NOT WBPheno: Bmd; Emb; Gro; Let; Lva; Lvl; Ste; Stp; Variant; embryonic development variant; postembryonic development variant
WBGene00021397|Y38C1AA.6	4.15	0.24	17.29		332 aa	Seg; Ncoils				WBPhenotype: Daf c	NOT WBPheno: Bmd; Emb; Ste; Variant
WBGene00003564|F10G8.5|ncs-2	3.1	0.18	17.22		190 aa			COG5126: Ca2+-binding protein (EF-Hand superfamily); KOG0044: Ca2+ sensor (EF-Hand superfamily); meNOG18381: Neuronal calcium sensor protein	PF00036: EF hand		NOT WBPheno: Bmd; Emb; Gro; Lva; Lvl; Ste; Stp; Variant; postembryonic development variant
WBGene00011763|T14B1.1	228.78	13.34	17.15		375 aa					WBPhenotype: fat content increased	NOT WBPheno: Bmd; Emb; Gro; Let; Lva; Lvl; Ste; Stp; Variant; postembryonic development variant
WBGene00021786|Y51H7C.8	0.51	0	17		72 aa						NOT WBPheno: Bmd; Emb; Gro; Lva; Lvl; Ste; Stp; Variant; postembryonic development variant
WBGene00018517|F46G11.4	0.51	0	17		67 aa	SignalP; Tmhmm; Seg					NOT WBPheno: Bmd; Emb; Let; Ste; Variant
WBGene00017236|F08B4.4	0.51	0	17		108 aa	SignalP; Tmhmm; Seg; Ncoils					NOT WBPheno: Bmd; Emb; Gro; Let; Lva; Lvl; Ste; Stp; Variant; postembryonic development variant
WBGene00012075|T27A8.3	0.51	0	17		182 aa			COG0024: Methionine aminopeptidase; KOG2775: Metallopeptidase; meNOG05440: Methionine protein			NOT WBPheno: Bmd; Emb; Let; Ste; Variant; postembryonic development variant
WBGene00009960|F53B6.5	0.51	0	17		182 aa			COG0024: Methionine aminopeptidase; KOG2775: Metallopeptidase; meNOG05440: Methionine protein
WBGene00001769|ZK697.6|gst-21	0.51	0	17		219-231 aa			KOG1695: Glutathione S-transferase; meNOG14525: Glutathione protein	PF00043: Glutathione S-transferase, C-terminal domain; PF02798: Glutathione S-transferase, N-terminal domain		NOT WBPheno: Bmd; Emb; Gro; Let; Lva; Lvl; Ste; Stp; Variant; enzyme activity reduced; postembryonic development variant
WBGene00013426|Y66A7A.7	4.75	0.28	16.96		117 aa	Tmhmm; Seg					NOT WBPheno: Bmd; Emb; Ste; Variant; embryonic development variant; postembryonic development variant
WBGene00002269|Y55B1AR.1|lec-6	534.24	31.53	16.94		146 aa	Seg		KOG3587: Galectin, galactose-binding lectin	PF00337: Galactoside-binding lectin		NOT WBPheno: Bmd; Emb; Gro; Let; Lva; Lvl; Ste; Stp; Variant; embryonic development variant; postembryonic development variant
WBGene00018280|F41C6.7	0.67	0.04	16.75		392 aa	Tmhmm; Seg		KOG1485: Mitochondrial Fe2+ transporter MMT1 and related transporters (cation diffusion facilitator superfamily)	PF01545: Cation efflux family		NOT WBPheno: Bmd; Emb; Gro; Let; Lva; Lvl; Ste; Stp; Variant; postembryonic development variant
WBGene00008379|D1054.13|secs-1	1.17	0.07	16.71	OMIM:613811 [PONTOCEREBELLAR HYPOPLASIA, TYPE 2D; PCH2D]	481-523 aa	Seg		COG0076: Glutamate decarboxylase and related PLP-dependent proteins; KOG3843: Predicted serine hydroxymethyltransferase SLA/LP (autoimmune hepatitis marker in humans); meNOG04389: UGA suppressor tRNA- associated protein	PF01212: Beta-eliminating lyase; PF05889: Soluble liver antigen/liver pancreas antigen (SLA/LP autoantigen)		NOT WBPheno: Bmd; Emb; Gro; Let; Lva; Lvl; Ste; Stp; Variant; nicotine response variant; phasmid socket absent; postembryonic development variant
WBGene00077553|C26C6.10	0.5	0	16.67		113 aa
WBGene00020032|R12E2.6	0.5	0	16.67		74 aa	SignalP; Seg					NOT WBPheno: Bmd; Emb; Gro; Let; Lva; Lvl; Ste; Stp; Variant; postembryonic development variant
WBGene00017239|F08B6.1	0.5	0	16.67		110 aa						NOT WBPheno: Bmd; Emb; Gro; Lva; Lvl; Ste; Stp; Variant; postembryonic development variant
WBGene00013588|Y80D3A.10|nlp-42	0.5	0	16.67		92 aa	SignalP; Tmhmm; Seg					NOT WBPheno: Bmd; Emb; Let; Ste; Variant; postembryonic development variant
WBGene00011021|R05A10.4	0.5	0	16.67		112 aa	SignalP; Seg					NOT WBPheno: Let; Variant; postembryonic development variant
WBGene00002089|ZK84.6|ins-6	0.5	0	16.67		112 aa	SignalP; Seg				WBPhenotype: Slu	NOT WBPheno: Bmd; Daf; Dpy; Emb; Let; Lon; Pvl; Ste; Unc; Variant; fat content increased; postembryonic development variant; small
WBGene00016217|C29F9.2	142.41	8.57	16.62		133 aa	Ncoils					NOT WBPheno: Bmd; Emb; Let; Ste; Variant; postembryonic development variant
WBGene00002276|F42H11.2|lem-3	1.16	0.07	16.57		732 aa	Seg		KOG0504: FOG: Ankyrin repeat; NOG137615: Ankyrin repeat domain-containing protein; euNOG08006: Ankyrin repeat domain-containing protein; meNOG16907: Ankyrin repeat domain-containing protein	PF00023: Ankyrin repeat; PF03020: LEM domain	WBPhenotype: axon fasciculation variant; axon midline crossing variant; cord commissures fail to reach target; organism hypersensitive X ray irradiation; ventral cord patterning variant	NOT WBPheno: Bmd; Emb; Gro; Let; Lva; Lvl; Ste; Stp; Variant; postembryonic development variant
WBGene00019402|K04G7.11	6.62	0.4	16.55		234 aa	Seg; Ncoils		KOG2609: Cyclin D-interacting protein GCIP; meNOG08201: Pre-Mrna splicing protein	PF08231: SYF2 splicing factor	WBPhenotype: Bmd; Emb; Gro; Lva; Lvl; Pvl; Rup; Sck; Ste; Stp; Unc; cell proliferation increased; excess intestinal cells; pattern of transgene expression variant; receptor mediated endocytosis defective; reduced brood size	NOT WBPheno: Variant; growth variant; postembryonic development variant
WBGene00004454|C09H10.2|rpl-41	591.41	35.83	16.51		105 aa			COG1631: Ribosomal protein L44E; KOG3464: 60S ribosomal protein L44; meNOG19509: Ribosomal protein L36a	PF00935: Ribosomal protein L44	WBPhenotype: Emb; Lva; Pvl; Ste; Stp; reduced brood size; small
WBGene00019293|K02A6.2	12.2	0.74	16.49		111 aa						NOT WBPheno: Bmd; Emb; Gro; Lva; Lvl; Ste; Stp; Variant; postembryonic development variant
WBGene00010174|F56H9.2	100.25	6.08	16.49		57 aa	SignalP; Tmhmm					NOT WBPheno: Bmd; Emb; Ste; Variant
WBGene00009816|F47B10.5	41.72	2.53	16.49		120 aa	Tmhmm					NOT WBPheno: Bmd; Emb; Gro; Let; Lva; Lvl; Ste; Stp; Variant; postembryonic development variant
WBGene00016920|C54E4.5	0.49	0	16.33		276 aa			KOG1573: Aldehyde reductase; meNOG06520: Inositol oxygenase			NOT WBPheno: Bmd; Emb; Ste; Variant
WBGene00012226|W03G11.4	8.08	0.5	16.16		484 aa	Seg; Ncoils					NOT WBPheno: Bmd; Emb; Gro; Let; Lva; Lvl; Ste; Stp; Variant; postembryonic development variant
WBGene00044484|C09B9.8	18.93	1.18	16.04		206 aa	SignalP; Tmhmm; Seg			PF06579: Caenorhabditis elegans ly-6-related protein
WBGene00009449|F35H8.4	156.27	9.75	16.03		101 aa	Tmhmm					NOT WBPheno: Bmd; Emb; Gro; Let; Lva; Lvl; Ste; Stp; Variant; postembryonic development variant
WBGene00012904|Y46G5A.13|tiar-2	0.48	0	16		434 aa	Seg		COG0724: RNA-binding proteins (RRM domain); KOG0148: Apoptosis-promoting RNA-binding protein TIA-1/TIAR (RRM superfamily); meNOG06352: RNA bindingprotein	PF00076: RNA recognition motif. (a.k.a. RRM, RBD, or RNP domain)		NOT WBPheno: Bmd; Emb; Let; Ste; Variant; postembryonic development variant
WBGene00000953|F58G6.6|del-2	1.12	0.07	16		451-583 aa	Seg					NOT WBPheno: Emb; Gro; Let; Lva; Lvl; Ste; Stp; Variant; postembryonic development variant
WBGene00000558|R09B5.9|cnc-4	7.84	0.49	16		66 aa	SignalP; Tmhmm; Seg					NOT WBPheno: Bmd; Emb; Gro; Let; Lva; Lvl; Ste; Stp; Variant; postembryonic development variant
WBGene00013712|Y106G6G.3|dlc-6	10.21	0.64	15.95		129 aa	Seg			PF01221: Dynein light chain type 1		NOT WBPheno: Bmd; Emb; Ste; Variant
WBGene00009624|F41E7.8|cnc-8	337.93	21.3	15.87		72 aa	SignalP; Tmhmm; Seg					NOT WBPheno: Bmd; Emb; Gro; Let; Lva; Lvl; Ste; Stp; Variant; postembryonic development variant
WBGene00044392|C25H3.16	3.49	0.22	15.86		119 aa	Tmhmm
WBGene00012101|T27F2.4	205.82	13	15.83		165 aa	Seg; Ncoils	Thomas+W_TF			WBPhenotype: Lon; rays fused	NOT WBPheno: Bmd; Emb; Gro; Let; Lva; Lvl; Ste; Stp; Variant; postembryonic development variant
WBGene00009578|F40F8.5	128.12	8.1	15.82		420 aa	Seg
WBGene00009078|F23B2.13|rpb-12	87.31	5.53	15.79		62 aa			KOG3507: DNA-directed RNA polymerase, subunit RPB7.0; meNOG21266: Polymerase	PF03604: DNA directed RNA polymerase, 7 kDa subunit	WBPhenotype: Emb; Lon; Lva; Pvl; Sck; Slu; Ste; Stp; reduced brood size; thin	NOT WBPheno: Bmd; Let; Variant; postembryonic development variant
WBGene00006817|F10G7.3|unc-85	4641.4	294.06	15.78		275 aa	Seg		COG5137: Histone chaperone involved in gene silencing; KOG3265: Histone chaperone involved in gene silencing; meNOG09879: Histone chaperone protein		WBPhenotype: DNA synthesis variant; Egl; Emb; Let; Ste; Unc; VNC nuclear positioning variant; bag of worms; chromosome condensation variant; egg laying imipramine resistant; egg laying levamisole resistant; egg laying phentolamine resistant; egg laying serotonin resistant; mRNA levels reduced; postembryonic cell lineage variant; protein expression absent	NOT WBPheno: Variant; embryonic cell lineage variant; postembryonic development variant
WBGene00017067|D2092.6	2.83	0.18	15.72		325 aa	Seg; Ncoils					NOT WBPheno: Bmd; Emb; Gro; Lva; Lvl; Ste; Stp; Variant; postembryonic development variant
WBGene00016368|C33G8.12|nhr-163	0.47	0	15.67		358 aa	SignalP	Walhout_TF	KOG3575: FOG: Hormone receptors	PF00104: Ligand-binding domain of nuclear hormone receptor; PF00105: Zinc finger, C4 type (two domains)		NOT WBPheno: Bmd; Emb; Gro; Let; Lva; Lvl; Ste; Stp; Variant; body size variant; failure to hatch; postembryonic development variant
WBGene00012864|Y45F3A.9	12.99	0.83	15.65		294 aa	Seg		COG0566: rRNA methylases; KOG0838: RNA Methylase, SpoU family; meNOG16891: Rrna methyltransferase 1, mitochondrial	PF00588: SpoU rRNA Methylase family; PF08032: RNA 2'-O ribose methyltransferase substrate binding		NOT WBPheno: Bmd; Emb; Gro; Lva; Lvl; Ste; Stp; Variant; embryonic development variant; postembryonic development variant
WBGene00020040|R12E2.15	2.5	0.16	15.62		74 aa	SignalP; Seg					NOT WBPheno: Bmd; Emb; Gro; Let; Lva; Lvl; Ste; Stp; Variant; postembryonic development variant
WBGene00007521|C11E4.7	2.18	0.14	15.57		342 aa	Seg; Ncoils				WBPhenotype: Ric	NOT WBPheno: Bmd; Emb; Gro; Let; Lva; Lvl; Ste; Stp; Variant; postembryonic development variant
WBGene00013763|Y113G7B.14	3.11	0.2	15.55		540 aa	Seg; Ncoils		COG0553: Superfamily II DNA/RNA helicases, SNF2 family; KOG4439: RNA polymerase II transcription termination factor TTF2/lodestar, DEAD-box superfamily; meNOG06312: Transcription termination factor 2 (EC 3.6.1.-)	PF00176: SNF2 family N-terminal domain; PF00270: DEAD/DEAH box helicase		NOT WBPheno: Bmd; Emb; Gro; Let; Lva; Lvl; Ste; Stp; Variant; organism UV hypersensitive; postembryonic development variant
WBGene00011970|T23G11.5|rlbp-1	67.27	4.35	15.46		253-461 aa	Seg; Ncoils		KOG4370: Ral-GTPase effector RLIP76; meNOG09063: Rala-Binding protein 1 (RalBP1)	PF00620: RhoGAP domain		NOT WBPheno: Bmd; Emb; Gro; Let; Lva; Lvl; Ste; Stp; Variant; postembryonic development variant
WBGene00000277|C23H4.1|cab-1	198.92	12.91	15.41		425 aa	Tmhmm; Seg; Ncoils		KOG3884: Neural proliferation, differentiation and control protein; meNOG17055: Neural proliferation, differentiation and control protein	PF06809: Neural proliferation differentiation control-1 protein (NPDC1)	WBPhenotype: Ric	NOT WBPheno: Bmd; Emb; Gro; Let; Lva; Lvl; Ste; Stp; Variant; postembryonic development variant
WBGene00015424|C04E6.8	0.46	0	15.33		139 aa						NOT WBPheno: Bmd; Emb; Gro; Let; Lva; Lvl; Ste; Stp; Variant; postembryonic development variant
WBGene00014073|ZK757.1	0.46	0	15.33		328 aa	Tmhmm; Seg			PF06681: Protein of unknown function (DUF1182)		NOT WBPheno: Bmd; Emb; Gro; Lva; Lvl; Ste; Stp; Variant; embryonic development variant; postembryonic development variant
WBGene00009968|F53B7.5|fig-1	62.04	4.05	15.32		2892-3095 aa	SignalP; Tmhmm; Seg		NOG116938: Tpr-Repeat-Containing protein	PF01681: C6 domain; PF01682: DB module		NOT WBPheno: Bmd; Emb; Gro; Let; Lva; Lvl; Ste; Stp; Variant; postembryonic development variant
WBGene00008987|F20G2.3	25.19	1.65	15.27		150-377 aa			KOG1471: Phosphatidylinositol transfer protein SEC14 and related proteins; meNOG10781: Sec14-Like protein	PF00650: CRAL/TRIO domain		NOT WBPheno: Let; Variant; postembryonic development variant
WBGene00017428|F13D11.3	7.17	0.47	15.26		174 aa			COG2453: Predicted protein-tyrosine phosphatase; KOG1716: Dual specificity phosphatase	PF00782: Dual specificity phosphatase, catalytic domain		NOT WBPheno: Bmd; Emb; Gro; Let; Lva; Lvl; Ste; Stp; Variant; postembryonic development variant; transgene expression reduced
WBGene00023416|R10H1.4|isl-1	7.46	0.49	15.22		100 aa	SignalP			PF01826: Trypsin Inhibitor like cysteine rich domain
WBGene00012322|W07A12.4	1.52	0.1	15.2		448 aa	Seg		KOG2075: Topoisomerase TOP1-interacting protein BTBD1; meNOG14900: Annotation not available	PF00651: BTB/POZ domain; PF07707: BTB And C-terminal Kelch
WBGene00009069|F23A7.4	1933.54	127.23	15.2		68 aa						NOT WBPheno: Let; Variant; postembryonic development variant
WBGene00009173|F26H9.1|prom-1	46.03	3.05	15.09		508 aa	Ncoils					NOT WBPheno: Bmd; Emb; Gro; Let; Lva; Lvl; Ste; Stp; Variant; postembryonic development variant
WBGene00021547|Y44E3A.1	4.66	0.31	15.03		83-154 aa						NOT WBPheno: Bmd; Emb; Gro; Let; Lva; Lvl; Ste; Stp; Variant; postembryonic development variant
WBGene00020490|T13G4.3	0.45	0	15	OMIM:600974 [DEAFNESS, AUTOSOMAL RECESSIVE 7; DFNB7]; OMIM:606705 [DEAFNESS, AUTOSOMAL DOMINANT 36; DFNA36]	1285 aa	Tmhmm; Seg		NOG78939: Transmembrane channel; euNOG05450: Transmembrane channel; meNOG10440: Transmembrane channel	PF07810: TMC domain		NOT WBPheno: Bmd; Emb; Gro; Lva; Lvl; Ste; Stp; Variant; postembryonic development variant
WBGene00015299|C01F1.4	0.45	0	15		333 aa	SignalP; Tmhmm; Seg		KOG3656: FOG: 7 transmembrane receptor	PF00001: 7 transmembrane receptor (rhodopsin family)		NOT WBPheno: Bmd; Emb; Gro; Let; Lva; Lvl; Ste; Stp; Variant; postembryonic development variant
WBGene00004756|ZC518.2|sec-24.2	0.45	0	15		984 aa	Seg		COG5028: Vesicle coat complex COPII, subunit SEC24/subunit SFB2/subunit SFB3; KOG1985: Vesicle coat complex COPII, subunit SEC24/subunit SFB2; meNOG05731: Transport protein	PF00626: Gelsolin repeat; PF04810: Sec23/Sec24 zinc finger; PF04811: Sec23/Sec24 trunk domain; PF04815: Sec23/Sec24 helical domain; PF08033: Sec23/Sec24 beta-sandwich domain	WBPhenotype: Bmd; Dpy; Emb; Gro; Lvl; Unc; body wall muscle myosin organization defective	NOT WBPheno: Let; protein aggregation variant; transgene subcellular localization variant
WBGene00003797|F53F10.5|npp-11	0.45	0	15		805 aa	Seg; Ncoils		KOG0845: Nuclear pore complex, Nup98 component (sc Nup145/Nup100/Nup116); KOG2196: Nuclear porin	PF05064: Nsp1-like C-terminal region	WBPhenotype: Emb; Gro; Lva; Lvl; Nmo; Pna; Pvl; Stp; pattern of transgene expression variant; receptor mediated endocytosis defective
WBGene00002110|ZC334.11|ins-27	0.45	0	15		83 aa	SignalP; Tmhmm			PF03488: Nematode insulin-related peptide beta type
WBGene00011442|T04F8.3	2.84	0.19	14.95	OMIM:600320 [DIABETES MELLITUS, INSULIN-DEPENDENT, 5; IDDM5]	177 aa	Seg					NOT WBPheno: Bmd; Emb; Ste; Variant
WBGene00016319|C32D5.12	3.72	0.25	14.88	OMIM:201810 [3-@BETA-HYDROXYSTEROID DEHYDROGENASE, TYPE II, DEFICIENCY OF]	357 aa	Seg		KOG1430: C-3 sterol dehydrogenase/3-beta-hydroxysteroid dehydrogenase and related dehydrogenases; meNOG09357: 3 beta-hydroxysteroid dehydrogenase type	PF01073: 3-beta hydroxysteroid dehydrogenase/isomerase family; PF01370: NAD dependent epimerase/dehydratase family; PF03435: Saccharopine dehydrogenase; PF05368: NmrA-like family	WBPhenotype: Dpy; Emb; Let; Lvl; Ste; Unc; protein aggregation variant; transgene subcellular localization variant	NOT WBPheno: Bmd; Variant
WBGene00012429|Y11D7A.5	3.12	0.21	14.86		161 aa	SignalP; Tmhmm; Seg					NOT WBPheno: Bmd; Emb; Gro; Let; Lva; Lvl; Ste; Stp; Variant; postembryonic development variant
WBGene00018961|F56D1.3	2057.41	139.49	14.75	OMIM:610498 [COMBINED OXIDATIVE PHOSPHORYLATION DEFICIENCY 2; COXPD2]	147 aa	Seg		KOG3419: Mitochondrial/chloroplast ribosomal protein S16; meNOG20216: 28S ribosomal protein S16, mitochondrial	PF00886: Ribosomal protein S16	WBPhenotype: Emb; Gro; pattern of transgene expression variant; receptor mediated endocytosis defective	NOT WBPheno: Bmd; Ste; Variant
WBGene00013819|Y116F11A.6	0.44	0	14.67		103 aa				PF00619: Caspase recruitment domain		NOT WBPheno: Bmd; Emb; Gro; Lva; Lvl; Ste; Stp; Variant; postembryonic development variant
WBGene00001943|E03A3.3|his-69	0.44	0	14.67		127 aa	Ncoils		COG2036: Histones H3 and H4; KOG1745: Histones H3 and H4	PF00125: Core histone H2A/H2B/H3/H4	WBPhenotype: Emb; Ste
WBGene00077699|C45B11.8	136.33	9.37	14.55		107 aa	Tmhmm; Seg
WBGene00010365|H04D03.4	6.25	0.43	14.53		688 aa	Seg
WBGene00021078|W08A12.1	21.78	1.5	14.52		438-501 aa	Seg		NOG39246: Annotation not available; euNOG04714: Annotation not available; meNOG05386: Annotation not available			NOT WBPheno: Bmd; Emb; Let; Ste; Variant; postembryonic development variant
WBGene00001249|W09C2.1|elt-1	4.79	0.33	14.52	OMIM:146255 [HYPOPARATHYROIDISM, SENSORINEURAL DEAFNESS, AND RENAL DISEASE; HDR]; OMIM:601626 [LEUKEMIA, ACUTE MYELOID; AML]; OMIM:614038 [LYMPHEDEMA, PRIMARY, WITH MYELODYSPLASIA]; OMIM:614172 [DENDRITIC CELL, MONOCYTE, B LYMPHOCYTE, AND NATURAL KILLER LYMPHOCYTE]; OMIM:614286 [MYELODYSPLASTIC SYNDROME; MDS]	416-488 aa	Seg	Thomas+W_TF	COG5641: GATA Zn-finger-containing transcription factor; KOG1601: GATA-4/5/6 transcription factors; meNOG10717: Transcription protein	PF00320: GATA zinc finger	WBPhenotype: Adl; Bmd; Egl; Emb; Rup; Unc; protein expression variant; transgene expression reduced; transgene expression variant	NOT WBPheno: Age; level of transgene expression variant
WBGene00002208|T06C10.6|kin-26	29.02	2.02	14.37		433 aa			COG0515: Serine/threonine protein kinase; KOG0194: Protein tyrosine kinase; meNOG06948: Tyrosine-Protein kinase	PF00017: SH2 domain; PF00069: Protein kinase domain; PF07714: Protein tyrosine kinase		NOT WBPheno: Bmd; Emb; Gro; Let; Lva; Lvl; Ste; Stp; Variant; postembryonic development variant
WBGene00000894|M110.5|dab-1	28.17	1.96	14.37		474-492 aa	Seg; Ncoils		KOG3535: Adaptor protein Disabled; meNOG09111: Disabled homolog 2 protein	PF00640: Phosphotyrosine interaction domain (PTB/PID)	WBPhenotype: Egl; Emb; Gro; Lva; Mig; Mlt; Oma; Slu; Unc; inhibition of oocyte maturation variant; meiotic progression during oogenesis variant; pattern of transgene expression variant; protein aggregation variant; receptor mediated endocytosis defective; reduced brood size; transgene expression increased; transgene subcellular localization variant	NOT WBPheno: Bmd; Let; Ste; Variant; postembryonic development variant; transgene expression reduced
WBGene00017259|F08F1.9	0.43	0	14.33		130 aa			KOG0654: G2/Mitotic-specific cyclin A
WBGene00011001|R04B5.1	0.43	0	14.33		86 aa	Tmhmm					NOT WBPheno: Bmd; Emb; Ste; Variant
WBGene00007716|C25D7.4|fbxa-82	0.43	0	14.33		269-319 aa				PF00646: F-box domain; PF01827: FTH domain		NOT WBPheno: Bmd; Emb; Gro; Lva; Lvl; Ste; Stp; Variant; postembryonic development variant
WBGene00006443|C45B11.1|pak-2	29.37	2.05	14.33	OMIM:211980 [LUNG CANCER]	520-522 aa			COG0515: Serine/threonine protein kinase; KOG0578: p21-activated serine/threonine protein kinase; meNOG04318: Activated kinase	PF00069: Protein kinase domain; PF00786: P21-Rho-binding domain; PF07714: Protein tyrosine kinase		NOT WBPheno: Bmd; Emb; Gro; Let; Lva; Lvl; Ste; Stp; Variant; postembryonic development variant
WBGene00003773|ZK892.2|nlt-1	764.06	53.41	14.31		118 aa			KOG4170: 2-enoyl-CoA hydratase/3-hydroxyacyl-CoA dehydrogenase/Peroxisomal 3-ketoacyl-CoA-thiolase, sterol-binding domain and related enzymes; meNOG27468: Sterol carrier protein	PF02036: SCP-2 sterol transfer family		NOT WBPheno: Bmd; Emb; Gro; Let; Lva; Lvl; Ste; Stp; Variant; postembryonic development variant
WBGene00019217|H20J04.2	35.92	2.52	14.25		1427 aa	Seg; Ncoils	Thomas+W_TF	COG5076: Transcription factor involved in chromatin remodeling, contains bromodomain; KOG1245: Chromatin remodeling complex WSTF-ISWI, large subunit (contains heterochromatin localization, PHD and BROMO domains); meNOG06925: Bromodomain adjacent to zinc finger domain protein 1A	PF00439: Bromodomain; PF00628: PHD-finger; PF02791: DDT domain; PF10537: ATP-utilising chromatin assembly and remodelling N-terminal	WBPhenotype: Unc	NOT WBPheno: Bmd; Emb; Let; Ste; Variant; organism UV hypersensitive
WBGene00017951|F31E3.4	1.42	0.1	14.2		1131 aa			COG0847: DNA polymerase III, epsilon subunit and related 3-5 exonucleases; COG2319: FOG: WD40 repeat; KOG1275: PAB-dependent poly(A) ribonuclease, subunit PAN2; meNOG04645: Pab-Dependent poly(A)-specific ribonuclease subunit 2	PF00929: Exonuclease		NOT WBPheno: Bmd; Emb; Gro; Let; Lva; Lvl; Rde; Ste; Stp; Variant; embryonic development variant; postembryonic development variant
WBGene00004450|F37C12.4|rpl-36	3097.5	219.22	14.13		104 aa			COG5051: Ribosomal protein L36E; KOG3452: 60S ribosomal protein L36; meNOG19604: Ribosomal protein L36	PF01158: Ribosomal protein L36e	WBPhenotype: Emb; Lva; Sck; Ste; transposon silencing variant
WBGene00004773|F15C11.1|sem-4	23.35	1.66	14.07	OMIM:107480 [TOWNES-BROCKS SYNDROME; TBS]; OMIM:147750 [IVIC SYNDROME]; OMIM:607323 [DUANE-RADIAL RAY SYNDROME; DRRS]	744 aa	Seg	Thomas+W_TF	COG5048: FOG: Zn-finger; KOG1074: Transcriptional repressor SALM; meNOG09929: Sal-Like protein 4	PF00096: Zinc finger, C2H2 type	WBPhenotype: Egl; Egl D; Gro; Let; Lin; Mab; Ste; antibody staining reduced; axon outgrowth variant; cell differentiation variant; hindgut morphology variant; male tail development variant	NOT WBPheno: Bmd; Emb; Lva; Lvl; Stp; Variant; loss of asymmetry ASE; postembryonic development variant
WBGene00011488|T05F1.1|nra-2	2.81	0.2	14.05	OMIM:142690 [ACNE INVERSA, FAMILIAL, 1; ACNINV1]	557-563 aa	SignalP; Tmhmm		KOG2526: Predicted aminopeptidases - M20/M25/M40 family; meNOG06300: Precursor Nicastrin-like protein	PF04389: Peptidase family M28; PF05450: Nicastrin	WBPhenotype: Ric; Ste; Unc; acetylcholine synaptic transmission variant; evoked postsynaptic current variant; levamisole resistant; ligand gated channel activity variant; nicotine resistant; postsynaptic region morphology variant; reduced brood size	NOT WBPheno: Bmd; Emb; Gro; Let; Lva; Lvl; Stp; Variant; muscimol resistant; postembryonic development variant
WBGene00008490|F01D4.8	0.56	0.04	14		430 aa	SignalP		COG0031: Cysteine synthase; KOG1252: Cystathionine beta-synthase and related enzymes; meNOG06974: Cystathionine beta-synthase (EC 4.2.1.22)	PF00291: Pyridoxal-phosphate dependent enzyme		NOT WBPheno: Bmd; Emb; Let; Ste; Variant; postembryonic development variant
WBGene00001711|T16G1.8|grl-2	0.42	0	14		365 aa	SignalP; Seg					NOT WBPheno: Bmd; Emb; Gro; Let; Lva; Lvl; Ste; Stp; Variant; postembryonic development variant
WBGene00044724|R02E4.3	28.53	2.04	13.99		87 aa	Seg; Ncoils
WBGene00021253|Y22D7AL.15	154.33	11.17	13.82		152 aa	Tmhmm; Seg			PF10601: LITAF-like zinc ribbon domain		NOT WBPheno: Bmd; Emb; Ste; Variant
WBGene00003471|ZK337.5|mtd-1	1.38	0.1	13.8		278 aa	SignalP; Seg				WBPhenotype: Mec	NOT WBPheno: Bmd; Emb; Let; Ste; Variant; postembryonic development variant
WBGene00004499|C26F1.4|rps-30	1271.54	92.89	13.69		130 aa	Seg		KOG0001: Ubiquitin and ubiquitin-like proteins; KOG0009: Ubiquitin-like/40S ribosomal S30 protein fusion; meNOG19677: Ubiquitin-Like protein FUBI	PF00240: Ubiquitin family	WBPhenotype: Lva
WBGene00003732|F14B8.1|nhx-4	0.41	0	13.67		684-749 aa	SignalP; Tmhmm; Seg		COG0025: NhaP-type Na+/H+ and K+/H+ antiporters; KOG1966: Sodium/hydrogen exchanger protein; meNOG05927: Exchanger protein	PF00999: Sodium/hydrogen exchanger family	WBPhenotype: Emb	NOT WBPheno: Let; Variant; postembryonic development variant
WBGene00008831|F14H3.12	3.27	0.24	13.62	OMIM:209850 [AUTISM]	142 aa			KOG0586: Serine/threonine protein kinase; meNOG04917: Microtubule protein		WBPhenotype: transgene induced cosuppression variant	NOT WBPheno: Bmd; Emb; Gro; Let; Lva; Lvl; Ste; Stp; Variant; postembryonic development variant
WBGene00021464|Y39G10AR.6|ugt-31	3.26	0.24	13.58		521 aa	SignalP; Tmhmm		COG1819: Glycosyl transferases, related to UDP-glucuronosyltransferase; KOG1192: UDP-glucuronosyl and UDP-glucosyl transferase; meNOG15060: UDP glycosyltransferase 3 family, polypeptide	PF04101: Glycosyltransferase family 28 C-terminal domain		NOT WBPheno: Bmd; Emb; Gro; Lva; Lvl; Ste; Stp; Variant; postembryonic development variant
WBGene00016530|C39D10.2	3.12	0.23	13.57		208 aa	Tmhmm					NOT WBPheno: Bmd; Emb; Gro; Lva; Lvl; Ste; Stp; Variant; postembryonic development variant
WBGene00006802|T07A5.6|unc-69	493	36.38	13.55		108-176 aa	Tmhmm; Seg; Ncoils		KOG3650: Predicted coiled-coil protein; meNOG20524: Short coiled-coil protein	PF10224: Predicted coiled-coil protein (DUF2205)	WBPhenotype: Unc; axon trajectory variant	NOT WBPheno: Emb; Let; Variant; coelomocyte uptake defective; postembryonic development variant
WBGene00001912|K03A1.6|his-38	2.16	0.16	13.5		103 aa	Seg		COG2036: Histones H3 and H4; KOG3467: Histone H4; meNOG20073: Histone H4 protein	PF00125: Core histone H2A/H2B/H3/H4; PF00808: Histone-like transcription factor (CBF/NF-Y) and archaeal histone; PF02969: TATA box binding protein associated factor (TAF)		NOT WBPheno: Bmd; Emb; Ste; Variant
WBGene00010474|K01D12.15	2.29	0.17	13.47		84 aa	Seg
WBGene00014032|ZK637.15	28	2.09	13.4		246 aa	Seg					NOT WBPheno: Let; Variant; postembryonic development variant
WBGene00019623|K10C9.1	0.4	0	13.33		77 aa	SignalP; Tmhmm; Seg					NOT WBPheno: Bmd; Emb; Gro; Lva; Lvl; Ste; Stp; Variant; postembryonic development variant
WBGene00019339|K02F6.5	0.4	0	13.33		232 aa			KOG2716: Polymerase delta-interacting protein PDIP1 and related proteins, contain BTB/POZ domain; meNOG07085: Domain-Containing protein	PF00651: BTB/POZ domain; PF02214: K+ channel tetramerisation domain		NOT WBPheno: Bmd; Emb; Let; Ste; Variant; postembryonic development variant
WBGene00014612|Y105E8A.31|mir-354	139.2	10.45	13.32
WBGene00002999|C09H6.2|lin-10	0.93	0.07	13.29		931-982 aa	Seg		KOG3605: Beta amyloid precursor-binding protein; meNOG04138: Precursor protein	PF00595: PDZ domain (Also known as DHR or GLGF); PF00640: Phosphotyrosine interaction domain (PTB/PID)	WBPhenotype: Vul; protein expression absent; protein expression variant; protein subcellular localization variant	NOT WBPheno: Bmd; Egl D; Emb; Gro; Let; Lva; Lvl; Ste; Stp; Variant; anoxia hypersensitive; cell polarity variant; coelomocyte uptake defective; intercellular junction variant; postembryonic development variant
WBGene00021010|W03G1.2	35.78	2.7	13.25		350 aa	Seg; Ncoils		euNOG20112: Annotation not available			NOT WBPheno: Bmd; Emb; Let; Ste; Variant; postembryonic development variant
WBGene00008647|F10C2.7	8.07	0.61	13.23	OMIM:269920 [INFANTILE SIALIC ACID STORAGE DISORDER]; OMIM:604369 [SIALURIA, FINNISH TYPE]	458 aa	SignalP; Tmhmm; Seg		COG0477: Permeases of the major facilitator superfamily; KOG2532: Permease of the major facilitator superfamily	PF07690: Major Facilitator Superfamily		NOT WBPheno: Bmd; Emb; Gro; Let; Lva; Lvl; Ste; Stp; Variant; postembryonic development variant
WBGene00003768|B0213.5|nlp-30	5.38	0.41	13.12		69 aa	SignalP; Tmhmm; Seg					NOT WBPheno: Bmd; Emb; Gro; Let; Lva; Lvl; Ste; Stp; Variant; postembryonic development variant
WBGene00010593|K06A4.3|gsnl-1	3.93	0.3	13.1	OMIM:105120 [AMYLOIDOSIS, FINNISH TYPE]	475 aa	Seg		KOG0443: Actin regulatory proteins (gelsolin/villin family); meNOG07175: Calcium-Regulated, actin-modulating protein that binds to the plus (or barbed) ends of actin monomers or filaments, preventing monomer exchange . It can promote the assembly of monomers into filaments as well as sever filaments already	PF00626: Gelsolin repeat		NOT WBPheno: Bmd; Emb; Gro; Let; Lva; Lvl; Ric; Ste; Stp; Variant; postembryonic development variant
WBGene00003081|ZK593.7|lsm-7	21.14	1.62	13.05		104 aa			COG1958: Small nuclear ribonucleoprotein (snRNP) homolog; KOG1781: Small Nuclear ribonucleoprotein splicing factor; meNOG19492: U6 snRNA-associated Sm-like protein	PF01423: LSM domain	WBPhenotype: Age; Emb; Lva; Sck; age associated fluorescence increased; cell proliferation increased; excess intestinal cells; organism development variant; transgene induced cosuppression variant	NOT WBPheno: Bmd; Let; Ste; Variant; postembryonic development variant
WBGene00022688|ZK250.5|math-47	21.96	1.69	12.99		625-832 aa	Seg			PF00646: F-box domain; PF00917: MATH domain; PF01827: FTH domain		NOT WBPheno: Bmd; Emb; Ste; Variant
WBGene00015235|B0511.9|cdc-26	4.74	0.37	12.81		185-194 aa	Seg				WBPhenotype: Emb; Etv; Mat; Ocs; Ste; embryonic polarity variant
WBGene00021690|Y48G8AL.12	11.76	0.92	12.78		78 aa	SignalP; Seg					NOT WBPheno: Bmd; Emb; Let; Ste; Variant
WBGene00001029|F38A5.13|dnj-11	2386.01	187.21	12.75		589 aa	Seg; Ncoils	Thomas+W_TF	COG5269: Ribosome-associated chaperone zuotin; KOG0724: Zuotin and related molecular chaperones (DnaJ superfamily), contains DNA-binding domains; meNOG04691: Protein involved in G2 phase of mitotic cell cycle	PF00226: DnaJ domain; PF00249: Myb-like DNA-binding domain	WBPhenotype: Emb; Gro; Let; Ste; apoptosis fails to occur; asymmetric cell division variant; cell cleavage variant; cell polarity variant; ectopic expression transgene; gene expression variant; morphology variant; protein expression ectopic; reduced brood size; spindle orientation variant	NOT WBPheno: Bmd; Lva; Lvl; Stp; Variant; meiosis variant; postembryonic development variant; protein aggregation variant; transgene subcellular localization variant
WBGene00008914|F17C11.2	795.43	62.68	12.69		91 aa	SignalP					NOT WBPheno: Bmd; Emb; Gro; Let; Lva; Lvl; Ste; Stp; Variant; postembryonic development variant
WBGene00006582|C08D8.2|tmd-2	21.07	1.66	12.69		308-639 aa	Seg; Ncoils		KOG3735: Tropomodulin and leiomodulin; meNOG07461: Tropomodulin protein			NOT WBPheno: Bmd; Emb; Gro; Let; Lva; Lvl; Ste; Stp; Variant; postembryonic development variant
WBGene00012658|Y39A1A.21	0.38	0	12.67		188 aa	Tmhmm; Seg		COG0500: SAM-dependent methyltransferases; KOG4058: Uncharacterized conserved protein; meNOG08890: Annotation not available			NOT WBPheno: Bmd; Emb; Gro; Let; Lva; Lvl; Ste; Stp; Variant; postembryonic development variant
WBGene00001753|R03D7.6|gst-5	0.38	0	12.67		207 aa			KOG1695: Glutathione S-transferase; meNOG14525: Glutathione protein	PF00043: Glutathione S-transferase, C-terminal domain; PF02798: Glutathione S-transferase, N-terminal domain	WBPhenotype: Age; Ced; apoptosis increased; enzyme activity reduced; organism electrophilic stress hypersensitive	NOT WBPheno: Bmd; Emb; Gro; Let; Lva; Lvl; Ste; Stp; Variant; postembryonic development variant
WBGene00001189|F01D4.4|egl-21	55.94	4.42	12.66	OMIM:212070 [CARBOXYPEPTIDASE N DEFICIENCY]	472 aa	SignalP; Tmhmm; Seg		COG2866: Predicted carboxypeptidase; KOG2649: Zinc carboxypeptidase; meNOG04425: Carboxypeptidase E	PF00246: Zinc carboxypeptidase	WBPhenotype: Egl D; Ric; coiler; egg laying imipramine resistant; egg laying serotonin resistant; egg retention	NOT WBPheno: Bmd; Emb; Let; Ste; Variant; associative learning variant; carbon dioxide avoidance variant; neuron activation variant; postembryonic development variant
WBGene00008226|C50B8.4	12.77	1.02	12.52		151 aa	Tmhmm; Seg				WBPhenotype: Emb	NOT WBPheno: Bmd; Gro; Let; Lva; Lvl; Ste; Stp; Variant; glp; postembryonic development variant
WBGene00011956|T23F11.4	3.5	0.28	12.5		316 aa	Seg	Thomas+W_TF			WBPhenotype: fat content reduced	NOT WBPheno: Bmd; Emb; Gro; Let; Lva; Lvl; Ste; Stp; Variant; embryonic development variant; fat content variant; germ cell development variant; gut granule development variant; postembryonic development variant
WBGene00020286|T06A10.3	74.29	5.95	12.49		169 aa	Seg		KOG4376: Uncharacterized conserved protein	PF05253: U11-48K-like CHHC zinc finger		NOT WBPheno: Bmd; Emb; Ste; Variant
WBGene00021890|Y54G2A.26	5.35	0.43	12.44		549-611 aa	Seg					NOT WBPheno: Bmd; Emb; Let; Ste; Variant; postembryonic development variant
WBGene00009770|F46B6.5	2.1	0.17	12.35		779-828 aa	Seg; Ncoils			PF08513: LisH		NOT WBPheno: Bmd; Emb; Gro; Lva; Lvl; Ste; Stp; Variant; postembryonic development variant
WBGene00017647|F20H11.4	73.31	5.94	12.34		446 aa	Seg; Ncoils		COG5599: Protein tyrosine phosphatase; KOG0789: Protein tyrosine phosphatase; meNOG07594: Receptor-Type tyrosine-protein phosphatase epsilon	PF00102: Protein-tyrosine phosphatase		NOT WBPheno: Bmd; Emb; Gro; Let; Lva; Lvl; Ste; Stp; Variant; embryonic development variant; postembryonic development variant
WBGene00011591|T07F10.5	0.37	0	12.33		116 aa			KOG0654: G2/Mitotic-specific cyclin A
WBGene00008810|F14F7.3|cyp-13A12	0.37	0	12.33	OMIM:145500 [HYPERTENSION, ESSENTIAL]; OMIM:231095 [GHOSAL HEMATODIAPHYSEAL DYSPLASIA; GHDD]; OMIM:614158 [BLEEDING DISORDER, PLATELET-TYPE, 14; BDPLT14]	518 aa	SignalP; Tmhmm; Seg		COG2124: Cytochrome P450; KOG0158: Cytochrome P450 CYP3/CYP5/CYP6/CYP9 subfamilies; meNOG09107: Cytochrome protein	PF00067: Cytochrome P450
WBGene00004166|Y43H11AL.3|pqn-85	0.37	0	12.33	OMIM:122470 [CORNELIA DE LANGE SYNDROME 1; CDLS1]	2203 aa	Seg; Ncoils		KOG1020: Sister chromatid cohesion protein SCC2/Nipped-B; meNOG05529: Nipped-B-Like protein		WBPhenotype: Emb; Let; Ste; body wall muscle myosin organization defective; chromosome segregation variant	NOT WBPheno: Bmd; Gro; Lva; Lvl; Stp; Variant; postembryonic development variant
WBGene00003235|C52E4.2|mif-2	0.37	0	12.33	OMIM:604302 [RHEUMATOID ARTHRITIS, SYSTEMIC JUVENILE]	90-120 aa			KOG1759: Macrophage migration inhibitory factor; meNOG20460: D-Dopachrome protein	PF01187: Macrophage migration inhibitory factor (MIF)	WBPhenotype: Emb	NOT WBPheno: Bmd; Gro; Let; Lva; Lvl; Ste; Stp; Variant; postembryonic development variant
WBGene00018898|F55F10.1	0.49	0.04	12.25		4368 aa	Seg; Ncoils		COG5271: AAA ATPase containing von Willebrand factor type A (vWA) domain; KOG1808: AAA ATPase containing von Willebrand factor type A (vWA) domain; meNOG04841: Protein involved in regulation of protein complex assembly	PF07726: ATPase family associated with various cellular activities (AAA); PF07728: AAA domain (dynein-related subfamily)	WBPhenotype: Clr; Gro; Let; Lva; Pch; Ste; Stp; distal tip cell migration variant; late larval arrest; pattern of transgene expression variant; receptor mediated endocytosis defective	NOT WBPheno: Bmd; Emb; Variant
WBGene00011530|T06D8.10	0.49	0.04	12.25		1490 aa	SignalP; Seg; Ncoils		KOG2408: Peroxidase/oxygenase; meNOG06104: Protein involved in phenylpropanoid biosynthesis	PF03098: Animal haem peroxidase		NOT WBPheno: Bmd; Emb; Gro; Let; Lva; Lvl; Ste; Stp; Variant; postembryonic development variant
WBGene00004751|K10G6.3|sea-2	0.49	0.04	12.25		1838 aa	Seg; Ncoils	Thomas+W_TF			WBPhenotype: Emb	NOT WBPheno: Adl; Bmd; Gro; Let; Lva; Lvl; Ste; Stp; Variant; postembryonic development variant
WBGene00044757|Y55F3BR.11	5.71	0.47	12.15		176 aa	SignalP; Seg		KOG4295: Serine proteinase inhibitor (KU family)
WBGene00000289|C01G6.8|cam-1	2.06	0.17	12.12	OMIM:113000 [BRACHYDACTYLY, TYPE B1; BDB1]; OMIM:268310 [ROBINOW SYNDROME, AUTOSOMAL RECESSIVE; RRS]; OMIM:613886 [OBESITY, HYPERPHAGIA, AND DEVELOPMENTAL DELAY]	769-928 aa	Tmhmm; Seg		COG0515: Serine/threonine protein kinase; KOG1026: Nerve growth factor receptor TRKA and related tyrosine kinases; meNOG04074: Tyrosine-Protein kinase	PF00047: Immunoglobulin domain; PF00051: Kringle domain; PF00069: Protein kinase domain; PF01392: Fz domain; PF07679: Immunoglobulin I-set domain; PF07714: Protein tyrosine kinase	WBPhenotype: Hin; Mig; Pch; Pvl; Ric; Unc; asymmetric cell division variant; axon guidance variant; axon outgrowth variant; dauer development variant; nerve ring development variant; protein expression variant	NOT WBPheno: Bmd; Emb; Let; Ste; Variant; anchor cell invasion variant; loss of asymmetry ASE; postembryonic development variant
WBGene00019660|K11H12.4	226.64	18.72	12.11		407 aa	SignalP; Seg			PF03409: Transmembrane glycoprotein		NOT WBPheno: Bmd; Emb; Let; Ste; Variant; postembryonic development variant
WBGene00007256|C01H6.7|tag-298	238.99	19.74	12.11		582-636 aa	Seg; Ncoils		COG5076: Transcription factor involved in chromatin remodeling, contains bromodomain; KOG1828: IRF-2-binding protein CELTIX-1, contains BROMO domain; meNOG11572: Bromodomain containing protein	PF00439: Bromodomain; PF12024: Domain of unknown function (DUF3512)	WBPhenotype: Bmd; Emb; Gro; Lvl; Ste	NOT WBPheno: Let; Lva; Stp; Variant; postembryonic development variant
WBGene00002027|T05F1.6|hsr-9	360.3	29.82	12.08		1165 aa	Seg		KOG3548: DNA damage checkpoint protein RHP9/CRB2/53BP1; meNOG12014: Tumor suppressor p53-binding protein 1	PF00533: BRCA1 C Terminus (BRCT) domain	WBPhenotype: Let; Lva; Pvl; Rup; Ste; Stp; fat content reduced; reduced brood size	NOT WBPheno: Bmd; Emb; Gro; Lvl; Variant; fat content variant; postembryonic development variant
WBGene00018409|F44B9.8	53.86	4.48	12.02		368 aa	Ncoils		COG0470: ATPase involved in DNA replication; KOG0990: Replication factor C, subunit RFC5; meNOG04736: Replication factor C subunit 5	PF00004: ATPase family associated with various cellular activities (AAA); PF03215: Rad17 cell cycle checkpoint protein; PF05496: Holliday junction DNA helicase ruvB N-terminus; PF06144: DNA polymerase III, delta subunit; PF08542: Replication factor C	WBPhenotype: Emb
WBGene00044568|F39C12.4	0.36	0	12	OMIM:125700 [DIABETES INSIPIDUS, NEUROHYPOPHYSEAL]	103 aa	SignalP; Tmhmm					NOT WBPheno: Let; Ste
WBGene00020736|T23F2.3	2.16	0.18	12		57 aa	Tmhmm		KOG1773: Stress responsive protein	PF01679: Uncharacterized protein family UPF0057		NOT WBPheno: Bmd; Emb; Gro; Let; Lva; Lvl; Ste; Stp; Variant; postembryonic development variant
WBGene00008315|C54G4.5	0.36	0	12		119 aa	Tmhmm					NOT WBPheno: Bmd; Emb; Gro; Let; Lva; Lvl; Ste; Stp; Variant; postembryonic development variant
WBGene00001906|F17E9.10|his-32	1.2	0.1	12		136 aa			COG2036: Histones H3 and H4; KOG1745: Histones H3 and H4; meNOG18419: Histone H3 protein	PF00125: Core histone H2A/H2B/H3/H4	WBPhenotype: Emb; Lva; Sck; Ste; reduced brood size; thin
WBGene00000615|F54C9.4|col-38	0.36	0	12		287 aa	SignalP; Tmhmm; Seg		KOG3544: Collagens (type IV and type XIII), and related proteins	PF01391: Collagen triple helix repeat (20 copies); PF01484: Nematode cuticle collagen N-terminal domain	WBPhenotype: Dpy	NOT WBPheno: Bmd; Emb; Let; Ste; Variant; postembryonic development variant
WBGene00014129|ZK892.5	48.31	4.05	11.93		253 aa	Tmhmm					NOT WBPheno: Bmd; Emb; Ste; Variant
WBGene00016738|C47D2.1	51.53	4.36	11.82		117 aa	SignalP					NOT WBPheno: Bmd; Emb; Gro; Let; Lva; Lvl; Ste; Stp; Variant; postembryonic development variant
WBGene00017317|F09G2.9	7.37	0.63	11.7	OMIM:154500 [TREACHER COLLINS SYNDROME 1; TCS1]	415 aa	Seg	Thomas+W_TF			WBPhenotype: Emb; Ste; fat content increased	NOT WBPheno: Bmd; Egl; Gro; Let; Lva; Lvl; Stp; Variant; octanol chemotaxis defective; postembryonic development variant; protein aggregation variant; transgene subcellular localization variant
WBGene00008483|E04D5.4	38.3	3.28	11.68		83-191 aa	SignalP; Seg			PF01549: ShK domain-like		NOT WBPheno: Bmd; Emb; Gro; Let; Lva; Lvl; Ste; Stp; Variant; postembryonic development variant
WBGene00022302|Y76B12C.8	0.35	0	11.67		85 aa	SignalP					NOT WBPheno: Bmd; Emb; Gro; Lva; Lvl; Ste; Stp; Variant; postembryonic development variant
WBGene00008222|C50B6.9	1.63	0.14	11.64		240 aa			KOG4667: Predicted esterase	PF01738: Dienelactone hydrolase family; PF06821: Alpha/Beta hydrolase family of unknown function (DUF1234)		NOT WBPheno: Bmd; Emb; Gro; Let; Lva; Lvl; Ste; Stp; Variant; postembryonic development variant
WBGene00014136|ZK896.5	2.32	0.2	11.6	OMIM:132810 [EPOXIDE HYDROLASE 1, MICROSOMAL; EPHX1]; OMIM:189800 [PREECLAMPSIA/ECLAMPSIA 1; PEE1]; OMIM:607748 [HYPERCHOLANEMIA, FAMILIAL; FHCA]	484 aa	SignalP; Seg			PF02408: CUB-like domain		NOT WBPheno: Bmd; Emb; Gro; Lva; Lvl; Ste; Stp; Variant; postembryonic development variant
WBGene00021840|Y54E10BR.1	14.6	1.26	11.59	OMIM:614080 [MULTIPLE CONGENITAL ANOMALIES-HYPOTONIA-SEIZURES SYNDROME; MCAHS]	906-912 aa	SignalP; Tmhmm; Seg; Ncoils		COG1524: Uncharacterized proteins of the AP superfamily; KOG2124: Glycosylphosphatidylinositol anchor synthesis protein; meNOG05602: GPI ethanolamine phosphate transferase 1	PF00884: Sulfatase; PF01663: Type I phosphodiesterase / nucleotide pyrophosphatase; PF04987: Phosphatidylinositolglycan class N (PIG-N)		NOT WBPheno: Bmd; Emb; Gro; Let; Lva; Lvl; Ste; Stp; Variant; postembryonic development variant; protein aggregation variant; transgene subcellular localization variant
WBGene00001690|R08B4.1|grd-1	6.14	0.53	11.58	OMIM:112500 [BRACHYDACTYLY, TYPE A1; BDA1]; OMIM:120200 [COLOBOMA, OCULAR]; OMIM:142945 [HOLOPROSENCEPHALY 3; HPE3]; OMIM:147250 [SOLITARY MEDIAN MAXILLARY CENTRAL INCISOR; SMMCI]; OMIM:174500 [POLYDACTYLY, PREAXIAL II; PPD2]; OMIM:233420 [46,XY SEX REVERSAL 7; SRXY7]; OMIM:269160 [SCHIZENCEPHALY]; OMIM:607080 [46,XY GONADAL DYSGENESIS, PARTIAL, WITH MINIFASCICULAR NEUROPATHY]; OMIM:607778 [ACROC…	1137-1160 aa	SignalP; Seg		KOG3638: Sonic hedgehog and related proteins; meNOG21914: Into two halves and then covalently link cholesterol to the C-terminus of the protein	PF01079: Hint module; PF04155: Ground-like domain	WBPhenotype: Bli; Mlt; male tail development variant; small	NOT WBPheno: Bmd; Dyf; Emb; Gro; Let; Lva; Lvl; Ste; Stp; Variant; cuticle morphology variant; postembryonic development variant
WBGene00001922|B0035.8|his-48	3.46	0.3	11.53		123 aa	Seg		KOG1744: Histone H2B; meNOG20185: Histone H2B protein	PF00125: Core histone H2A/H2B/H3/H4; PF00808: Histone-like transcription factor (CBF/NF-Y) and archaeal histone	WBPhenotype: Emb; Lva; Lvl; Pvl; Ste; thin
WBGene00010783|K11H3.6	1.84	0.16	11.5		77 aa			KOG4122: Mitochondrial/chloroplast ribosomal protein L36; meNOG22114: Ribosomal protein, L36	PF00444: Ribosomal protein L36
WBGene00022075|Y69A2AR.3	8.15	0.71	11.48		83 aa						NOT WBPheno: Bmd; Emb; Ste; Variant
WBGene00013211|Y54G9A.9	11.08	0.97	11.42		93 aa	Tmhmm
WBGene00009665|F43G9.2	6.62	0.58	11.41		142-209 aa	Tmhmm; Seg		KOG2850: Predicted peptidoglycan-binding protein, contains LysM domain; meNOG13847: Lysm and peptidoglycan-binding domain-containing protein	PF01476: LysM domain		NOT WBPheno: Bmd; Emb; Gro; Let; Lva; Lvl; Ste; Stp; Variant; postembryonic development variant
WBGene00018974|F56D12.6	1224.17	107.36	11.4		951-968 aa	Seg; Ncoils		KOG2398: Predicted proline-serine-threonine phosphatase-interacting protein (PSTPIP); meNOG06701: Sh3-Containing GRB2-like protein 3-interacting protein 1	PF00611: Fes/CIP4 homology domain; PF10291: SAFF domain		NOT WBPheno: Bmd; Emb; Let; Ste; Variant; postembryonic development variant
WBGene00010888|M18.2|dlc-2	11.59	1.02	11.36		90 aa			KOG3430: Dynein light chain type 1; meNOG20124: Dynein, light chain protein			NOT WBPheno: Bmd; Emb; Gro; Let; Lva; Lvl; Ste; Stp; Tum; Variant; postembryonic development variant
WBGene00007855|C31H5.4	5.11	0.45	11.36		60 aa	Seg					NOT WBPheno: Let; Variant; postembryonic development variant
WBGene00004453|C26F1.9|rpl-39	7.04	0.62	11.35		51 aa			COG2167: Ribosomal protein L39E; KOG0002: 60s ribosomal protein L39; meNOG21717: 60S ribosomal protein L39		WBPhenotype: Let; Lva; Ste; small
WBGene00077538|T04F3.5	0.34	0	11.33		247 aa	SignalP; Tmhmm; Seg
WBGene00044380|T24E12.12	0.34	0	11.33		53 aa
WBGene00020664|T21H3.5	0.34	0	11.33		383 aa	SignalP; Tmhmm; Seg					NOT WBPheno: Bmd; Emb; Ste; Variant
WBGene00016052|C24B9.9|dod-3	7.54	0.67	11.25		106 aa	Tmhmm; Seg				WBPhenotype: Age	NOT WBPheno: Bmd; Emb; Gro; Let; Lva; Lvl; Ste; Stp; Variant; postembryonic development variant
WBGene00010453|K01B6.1|fozi-1	0.45	0.04	11.25		732 aa	Seg; Ncoils	Gupta_TF	KOG1923: Rac1 GTPase effector FRL; meNOG06571: Formin-Like protein	PF02181: Formin Homology 2 Domain	WBPhenotype: neuronal cell fate specification variant	NOT WBPheno: Bmd; Emb; Gro; Let; Lva; Lvl; Ste; Stp; Variant; embryonic development variant; postembryonic development variant
WBGene00010896|M28.5	29266.1	2606.03	11.23		128 aa	Seg		COG1358: Ribosomal protein HS6-type (S12/L30/L7a); KOG3387: 60S ribosomal protein 15.5kD/SNU13, NHP2/L7A family (includes ribonuclease P subunit p38), involved in splicing; meNOG19406: Nhp2-Like protein 1 (High mobility group-like nuclear protein 2 homolog 1)	PF01248: Ribosomal protein L7Ae/L30e/S12e/Gadd45 family	WBPhenotype: Bmd; Emb; Let; Lva; Lvl; Sck; Ste; cell proliferation increased; excess intestinal cells; pattern of transgene expression variant; protein aggregation variant; receptor mediated endocytosis defective; transgene subcellular localization variant	NOT WBPheno: Variant; postembryonic development variant
WBGene00003434|K08F4.8|msp-38	229.25	20.46	11.2		127 aa				PF00635: MSP (Major sperm protein) domain		NOT WBPheno: Bmd; Emb; Let; Ste; Variant
WBGene00012440|Y12A6A.2	9.71	0.87	11.16		75 aa	SignalP; Tmhmm					NOT WBPheno: Bmd; Emb; Gro; Let; Lva; Lvl; Ste; Stp; Variant; postembryonic development variant
WBGene00004276|K09A9.2|rab-14	20.88	1.88	11.11		210 aa			COG1100: GTPase SAR1 and related small G proteins; KOG0097: GTPase Rab14, small G protein superfamily; meNOG04981: Ras-Related protein Rab	PF00009: Elongation factor Tu GTP binding domain; PF00025: ADP-ribosylation factor family; PF00071: Ras family; PF04670: Gtr1/RagA G protein conserved region; PF08477: Miro-like protein		NOT WBPheno: Bmd; Dyf; Emb; Gro; Let; Lva; Lvl; Ste; Stp; Variant; membrane trafficking variant; postembryonic development variant
WBGene00018756|F53C3.13	131.22	11.84	11.08		340-385 aa	SignalP; Tmhmm; Seg		COG0671: Membrane-associated phospholipid phosphatase; KOG3030: Lipid phosphate phosphatase and related enzymes of the PAP2 family; meNOG12321: Lipid phosphate phosphohydrolase 1	PF01569: PAP2 superfamily		NOT WBPheno: Bmd; Emb; Gro; Let; Lva; Lvl; Ste; Stp; Variant; postembryonic development variant; protein aggregation variant; transgene subcellular localization variant
WBGene00015094|B0261.6	130.05	11.74	11.08		84-153 aa	Seg					NOT WBPheno: Bmd; Emb; Gro; Let; Lva; Lvl; Ste; Stp; Variant; postembryonic development variant
WBGene00010633|K07F5.5|nspd-2	18.63	1.69	11.02		70 aa	Seg					NOT WBPheno: Bmd; Emb; Gro; Let; Lva; Lvl; Ste; Stp; Variant; postembryonic development variant
WBGene00005001|F32D8.9|spp-16	85.99	7.8	11.02		101 aa	SignalP; Seg					NOT WBPheno: Bmd; Emb; Gro; Let; Lva; Lvl; Ste; Stp; Variant; postembryonic development variant; transgene expression reduced
WBGene00077559|R05D7.7	1.76	0.16	11		105 aa	SignalP; Tmhmm; Seg
WBGene00019673|K12C11.1	0.33	0	11	OMIM:170100 [PROLIDASE DEFICIENCY]	498 aa	Seg		COG0006: Xaa-Pro aminopeptidase; KOG2737: Putative metallopeptidase; meNOG05015: Xaa-Pro dipeptidase	PF00557: Metallopeptidase family M24; PF05195: Aminopeptidase P, N-terminal domain		NOT WBPheno: Bmd; Emb; Gro; Let; Lva; Lvl; Ste; Stp; Variant; postembryonic development variant
WBGene00017303|F09F7.6	6.16	0.56	11		87 aa	Seg; Ncoils					NOT WBPheno: Bmd; Emb; Gro; Let; Lva; Lvl; Ste; Stp; Variant; embryonic development variant; postembryonic development variant
WBGene00015946|C18A3.10	0.33	0	11		71 aa	Tmhmm; Seg
WBGene00011302|R166.2	0.33	0	11		618 aa	Tmhmm; Seg		KOG2489: Transmembrane protein; meNOG06329: Cleft lip and palate transmembrane protein 1	PF05602: Cleft lip and palate transmembrane protein 1 (CLPTM1)		NOT WBPheno: Bmd; Emb; Gro; Let; Lva; Lvl; Ste; Stp; Variant; postembryonic development variant; protein aggregation variant; transgene subcellular localization variant
WBGene00004508|F26A3.8|rrf-1	1.87	0.17	11		1601 aa	Seg; Ncoils		KOG0988: RNA-directed RNA polymerase QDE-1 required for posttranscriptional gene silencing and RNA interference	PF05183: RNA dependent RNA polymerase		NOT WBPheno: 21U RNA expression variant; Bmd; Emb; Let; Lva; Ste; Variant; cytoplasmic RNAi defective; nuclear RNAi defective; protein rna interaction abolished; siRNA expression variant
WBGene00002015|T27E4.8|hsp-16.1	0.33	0	11	OMIM:608810 [MYOPATHY, MYOFIBRILLAR, 2, MFM2]; OMIM:613763 [CATARACT, POSTERIOR POLAR, 2; CTPP2]; OMIM:613869 [MYOPATHY, MYOFIBRILLAR, FATAL INFANTILE HYPERTONIC, ALPHA-B CRYSTALLIN-RELATED]	145 aa			KOG3591: Alpha crystallins	PF00011: Hsp20/alpha crystallin family
WBGene00020840|T27A3.4	184.61	16.83	10.97		203 aa	Seg		euNOG12291: Annotation not available			NOT WBPheno: Bmd; Emb; Let; Ste; Variant; postembryonic development variant
WBGene00017750|F23F1.10	118.04	10.77	10.96		96 aa
WBGene00016741|C48B6.3	31.86	2.91	10.95		206 aa	Seg					NOT WBPheno: Bmd; Emb; Gro; Let; Lva; Lvl; Ste; Stp; Variant; postembryonic development variant
WBGene00003610|ZC410.1|nhr-11	47.91	4.39	10.91		394-459 aa	Seg	Walhout_TF	KOG3575: FOG: Hormone receptors	PF00104: Ligand-binding domain of nuclear hormone receptor; PF00105: Zinc finger, C4 type (two domains)		NOT WBPheno: Bmd; Emb; Gro; Let; Lva; Lvl; Ste; Stp; Variant; postembryonic development variant
WBGene00022286|Y75B7AL.4|rga-4	1.09	0.1	10.9		285-1126 aa	Seg		KOG1453: Chimaerin and related Rho GTPase activating proteins; meNOG27737: Protein involved in regulation of actin filament-based process	PF00620: RhoGAP domain	WBPhenotype: Emb; Stp
WBGene00017060|D2063.1	37.04	3.4	10.89		326 aa			COG1064: Zn-dependent alcohol dehydrogenases; KOG0023: Alcohol dehydrogenase, class V; meNOG19304: Protein involved in 3-chloroacrylic acid degradation	PF00107: Zinc-binding dehydrogenase; PF08240: Alcohol dehydrogenase GroES-like domain		NOT WBPheno: Bmd; Emb; Gro; Let; Lva; Lvl; Ste; Stp; Variant; postembryonic development variant
WBGene00003010|B0001.1|lin-24	310.14	28.51	10.88		271 aa	Seg			PF03318: Clostridium epsilon toxin ETX/Bacillus mosquitocidal toxin MTX2	WBPhenotype: Ced; Egl D; Vul
WBGene00019983|R09E12.3|sti-1	7.55	0.7	10.79		320 aa	Seg; Ncoils		COG0457: FOG: TPR repeat; KOG0548: Molecular co-chaperone STI1; meNOG05099: Stress-Induced-Phosphoprotein 1	PF00515: Tetratricopeptide repeat; PF07719: Tetratricopeptide repeat	WBPhenotype: Emo; Ste; gonad development variant; spermatheca development variant	NOT WBPheno: Bmd; Emb; Gro; Let; Lva; Lvl; Stp; Variant; postembryonic development variant
WBGene00016964|C56C10.7	17.14	1.59	10.78		243-417 aa	Seg		KOG2625: Uncharacterized conserved protein; meNOG04383: Annotation not available	PF06159: Protein of unknown function (DUF974)		NOT WBPheno: Bmd; Emb; Gro; Let; Lva; Lvl; Ste; Stp; Variant; postembryonic development variant
WBGene00011564|T07C5.1|ugt-50	229.42	21.3	10.77	OMIM:143500 [GILBERT SYNDROME]; OMIM:218800 [CRIGLER-NAJJAR SYNDROME]; OMIM:237900 [HYPERBILIRUBINEMIA, TRANSIENT FAMILIAL NEONATAL]; OMIM:601816 [BILIRUBIN, SERUM LEVEL OF, QUANTITATIVE TRAIT LOCUS 1; BILIQTL1]; OMIM:606785 [CRIGLER-NAJJAR SYNDROME, TYPE II]; OMIM:612560 [BONE MINERAL DENSITY QUANTITATIVE TRAIT LOCUS 12; BMND12]	190-523 aa	SignalP; Tmhmm		COG1819: Glycosyl transferases, related to UDP-glucuronosyltransferase; KOG1192: UDP-glucuronosyl and UDP-glucosyl transferase; meNOG13111: Udp-Glucuronosyltransferase	PF00201: UDP-glucoronosyl and UDP-glucosyl transferase; PF04101: Glycosyltransferase family 28 C-terminal domain		NOT WBPheno: Bmd; Emb; Gro; Let; Lva; Lvl; Ste; Stp; Variant; postembryonic development variant
WBGene00002191|B0205.7|kin-3	106.21	9.86	10.77		360 aa	Seg		COG0515: Serine/threonine protein kinase; KOG0668: Casein kinase II, alpha subunit; meNOG04011: Casein kinase	PF00069: Protein kinase domain; PF01636: Phosphotransferase enzyme family; PF07714: Protein tyrosine kinase	WBPhenotype: Emb; Gro; Pvl; Ste; male response to contact defective; vulva location variant	NOT WBPheno: Bmd; Variant
WBGene00018960|F56D1.2	763.82	71.1	10.74		718 aa	SignalP; Tmhmm; Seg			PF08357: SEFIR domain		NOT WBPheno: Bmd; Emb; Gro; Lva; Lvl; Ste; Stp; Variant; postembryonic development variant
WBGene00009161|F26E4.6	1973.76	183.89	10.73		84 aa	Tmhmm		KOG4527: Cytochrome c oxidase, subunit VIIc/COX8		WBPhenotype: Age; Gro; Lva; Ste; fat content increased; reduced brood size; transgene expression variant	NOT WBPheno: Emb; Let; Lvl; Stp; Variant; postembryonic development variant; protein aggregation variant; transgene subcellular localization variant
WBGene00022519|ZC123.4	0.75	0.07	10.71		394-536 aa	Seg		COG0515: Serine/threonine protein kinase; KOG0594: Protein kinase PCTAIRE and related kinases; meNOG04118: Protein kinase	PF00069: Protein kinase domain; PF07714: Protein tyrosine kinase		NOT WBPheno: Bmd; Emb; Gro; Let; Lva; Lvl; Ste; Stp; Variant; postembryonic development variant
WBGene00017445|F14B8.2	62.42	5.83	10.71		67 aa	Tmhmm					NOT WBPheno: Bmd; Emb; Let; Ste; Variant; postembryonic development variant
WBGene00010649|K08C7.7	12.31	1.15	10.7		238-298 aa	Seg					NOT WBPheno: Bmd; Emb; Gro; Let; Lva; Lvl; Ste; Stp; Variant; postembryonic development variant
WBGene00021662|Y48G1BL.1	0.32	0	10.67		318 aa	Seg		KOG2664: Small nuclear RNA activating protein complex - 50kD subunit (SNAP50)	PF12251: snRNA-activating protein of 50kDa MW C terminal
WBGene00019342|K02F6.8	0.32	0	10.67		232 aa			KOG2716: Polymerase delta-interacting protein PDIP1 and related proteins, contain BTB/POZ domain; meNOG07085: Domain-Containing protein	PF00651: BTB/POZ domain; PF02214: K+ channel tetramerisation domain		NOT WBPheno: Bmd; Emb; Ste; Variant
WBGene00019900|R05G6.7	2967.41	279.03	10.63	OMIM:604492 [VOLTAGE-DEPENDENT ANION CHANNEL 1; VDAC1]	283 aa			KOG3126: Porin/voltage-dependent anion-selective channel protein; meNOG05950: Voltage-Dependent anion protein	PF01459: Eukaryotic porin	WBPhenotype: Let; Ste	NOT WBPheno: Bmd; Emb; Gro; Lva; Lvl; Stp; Variant; postembryonic development variant
WBGene00002069|C04F12.3|ikb-1	45.08	4.25	10.61		597 aa	Seg		COG0666: FOG: Ankyrin repeat; KOG0504: FOG: Ankyrin repeat; meNOG16428: B-Cell lymphoma 3-encoded protein	PF00023: Ankyrin repeat; PF00531: Death domain	WBPhenotype: Gro	NOT WBPheno: Bmd; Emb; Let; Lva; Lvl; Ste; Stp; Variant; postembryonic development variant; transgene expression reduced
WBGene00001988|W02B8.5|hot-3	1.8	0.17	10.59		196 aa	SignalP; Tmhmm; Seg			PF06579: Caenorhabditis elegans ly-6-related protein		NOT WBPheno: Bmd; Emb; Ste; Variant
WBGene00010685|K08F9.2|aipl-1	129.51	12.28	10.55		600 aa	Seg		COG2319: FOG: WD40 repeat; KOG0318: WD40 repeat stress protein/actin interacting protein; meNOG06773: Wd-Repeat protein	PF00400: WD domain, G-beta repeat		NOT WBPheno: Bmd; Emb; Gro; Let; Lva; Lvl; Ste; Stp; Variant; postembryonic development variant
WBGene00010625|K07C5.2	3.68	0.35	10.51		301 aa			COG0656: Aldo/keto reductases, related to diketogulonate reductase; KOG1577: Aldo/keto reductase family proteins; meNOG10321: Protein involved in positive regulation of growth rate	PF00248: Aldo/keto reductase family		NOT WBPheno: Bmd; Emb; Gro; Let; Lva; Lvl; Ste; Stp; Variant; postembryonic development variant
WBGene00020057|R13D11.3	1.89	0.18	10.5		376 aa	Tmhmm; Seg			PF10316: Serpentine type 7TM GPCR chemoreceptor Srbc		NOT WBPheno: Bmd; Emb; Gro; Lva; Lvl; Ste; Stp; Variant; postembryonic development variant
WBGene00016069|C24H10.3	9.03	0.86	10.5		95 aa						NOT WBPheno: Bmd; Emb; Gro; Lva; Lvl; Ste; Stp; Variant; postembryonic development variant
WBGene00016558|C41A3.1	14.97	1.43	10.47		7829 aa	Seg; Ncoils		COG1020: Non-ribosomal peptide synthetase modules and related proteins; COG3321: Polyketide synthase modules and related proteins; KOG1178: Non-ribosomal peptide synthetase/alpha-aminoadipate reductase and related enzymes; KOG1202: Animal-type fatty acid synthase and related proteins; meNOG25821: Annotation not available	PF00106: short chain dehydrogenase; PF00109: Beta-ketoacyl synthase, N-terminal domain; PF00501: AMP-binding enzyme; PF00550: Phosphopantetheine attachment site; PF00668: Condensation domain; PF00698: Acyl transferase domain; PF00975: Thioesterase domain; PF01370: NAD dependent epimerase/dehydratase family; PF02801: Beta-ketoacyl synthase, C-terminal domain; PF08659: KR domain		NOT WBPheno: Bmd; Emb; Ste; Variant
WBGene00012252|W04E12.7	49.62	4.74	10.47		222 aa			KOG4755: Predicted pyroglutamyl peptidase	PF06162: Caenorhabditis elegans protein of unknown function (DUF976)		NOT WBPheno: Bmd; Emb; Let; Ste; Variant; postembryonic development variant
WBGene00011430|T04C12.8	4.19	0.4	10.47		77 aa	SignalP; Tmhmm
WBGene00015692|C10H11.3|ugt-25	18.41	1.76	10.46		531 aa	SignalP; Tmhmm; Seg		KOG1192: UDP-glucuronosyl and UDP-glucosyl transferase; meNOG15060: UDP glycosyltransferase 3 family, polypeptide	PF04101: Glycosyltransferase family 28 C-terminal domain		NOT WBPheno: Bmd; Emb; Gro; Let; Lva; Lvl; Ste; Stp; Variant; postembryonic development variant
WBGene00007345|C05E7.3	10.97	1.05	10.45		156 aa	SignalP; Tmhmm					NOT WBPheno: Bmd; Emb; Gro; Let; Lva; Lvl; Ste; Stp; Variant; postembryonic development variant
WBGene00017921|F29B9.5	8.22	0.79	10.41		179 aa			KOG2501: Thioredoxin, nucleoredoxin and related proteins; meNOG18341: Protein involved in cell redox homeostasis	PF00085: Thioredoxin; PF00578: AhpC/TSA family; PF02630: SCO1/SenC; PF08534: Redoxin		NOT WBPheno: Bmd; Emb; Gro; Let; Lva; Lvl; Ste; Stp; Variant; postembryonic development variant
WBGene00017789|F25E5.8	18.93	1.83	10.34		176-235 aa	Seg					NOT WBPheno: Bmd; Emb; Gro; Let; Lva; Lvl; Ste; Stp; Variant; postembryonic development variant
WBGene00019750|M03D4.3	0.31	0	10.33		59 aa	SignalP; Tmhmm					NOT WBPheno: Bmd; Emb; Let; Ste; Variant; postembryonic development variant
WBGene00000512|B0285.9|ckb-2	33.68	3.26	10.33	OMIM:602541 [MUSCULAR DYSTROPHY, CONGENITAL, MEGACONIAL TYPE; MDCMC]	369 aa			COG0510: Predicted choline kinase involved in LPS biosynthesis; KOG2686: Choline kinase; meNOG04357: Choline kinase	PF01633: Choline/ethanolamine kinase; PF01636: Phosphotransferase enzyme family	WBPhenotype: Gro	NOT WBPheno: Emb; Let; Lva; Lvl; Ste; Stp; Variant; postembryonic development variant
WBGene00021529|Y41G9A.5	5.16	0.5	10.32		402-411 aa	SignalP; Seg				WBPhenotype: accumulated cell corpses; cell corpse digestion variant; phagosome maturation defective	NOT WBPheno: Bmd; Emb; Let; Ste; Variant; postembryonic development variant
WBGene00009051|F22D6.4|nduf-6	368.11	35.67	10.32	OMIM:252010 [MITOCHONDRIAL COMPLEX I DEFICIENCY]	140 aa			KOG3456: NADH:ubiquinone oxidoreductase, NDUFS6/13 kDa subunit; meNOG19796: NADH dehydrogenase	PF10276: Zinc-finger domain	WBPhenotype: Bmd; Emb; Gro; Lva; reduced brood size	NOT WBPheno: Ste; Variant
WBGene00000424|C09G12.8|ced-10	1.34	0.13	10.31	OMIM:608203 [NEUTROPHIL IMMUNODEFICIENCY SYNDROME]	129-191 aa			COG1100: GTPase SAR1 and related small G proteins; KOG0393: Ras-related small GTPase, Rho type; meNOG06607: Ras-Related C3 botulinum protein	PF00071: Ras family; PF08477: Miro-like protein	WBPhenotype: Emb; Let; Ste; accumulated cell corpses; axon guidance variant; cell polarity variant; distal tip cell migration variant; distal tip cell reflex failure; engulfment failure by killer; engulfment variant; gonad arm morphology variant	NOT WBPheno: Bmd; Variant; axon morphology variant; distal tip cell development variant; neuron morphology variant; postembryonic development variant
WBGene00016009|C23F12.4	111.97	10.87	10.3		186 aa						NOT WBPheno: Bmd; Emb; Gro; Let; Lva; Lvl; Ste; Stp; Variant; postembryonic development variant
WBGene00001331|F09B9.3|erd-2	0.41	0.04	10.25		213 aa	SignalP; Tmhmm		COG5196: ER lumen protein retaining receptor; KOG3106: ER lumen protein retaining receptor; meNOG05968: ER lumen protein retaining receptor	PF00810: ER lumen protein retaining receptor		NOT WBPheno: Bmd; Emb; Gro; Let; Lva; Lvl; Ste; Stp; Variant; postembryonic development variant; protein aggregation variant; transgene subcellular localization variant
WBGene00011559|T07C4.1|umps-1	1596.29	156	10.23	OMIM:258900 [OROTIC ACIDURIA]	497 aa			COG0284: Orotidine-5-phosphate decarboxylase; COG0461: Orotate phosphoribosyltransferase; KOG1377: Uridine 5- monophosphate synthase/orotate phosphoribosyltransferase; meNOG05205: Uridine 5'-monophosphate synthase	PF00156: Phosphoribosyl transferase domain; PF00215: Orotidine 5'-phosphate decarboxylase / HUMPS family	WBPhenotype: Fluorouracil resistant; Gro; Ste; intestinal vacuole	NOT WBPheno: Bmd; Emb; Let; Variant; embryonic development variant; nicotine response variant; postembryonic development variant
WBGene00008346|C56A3.8	13.08	1.28	10.22		402 aa			KOG2381: Phosphatidylinositol 4-kinase; meNOG05733: Phosphatidylinositol 4 protein	PF00454: Phosphatidylinositol 3- and 4-kinase	WBPhenotype: Emb; Lva; Lvl; Ste; reduced brood size	NOT WBPheno: Bmd; Gro; Let; Stp; Variant; postembryonic development variant
WBGene00015339|C02E7.6	21.15	2.08	10.17		70 aa	SignalP; Seg					NOT WBPheno: Bmd; Emb; Let; Ste; Variant; postembryonic development variant
WBGene00010113|F55D12.5	98.41	9.69	10.16		552 aa	SignalP; Seg; Ncoils			PF01064: Activin types I and II receptor domain		NOT WBPheno: Bmd; Emb; Gro; Let; Lva; Lvl; Ste; Stp; Variant; postembryonic development variant
WBGene00006359|B0336.9|swp-1	0.71	0.07	10.14		66-751 aa	Seg; Ncoils		KOG1847: mRNA splicing factor; meNOG11691: Splicing factor, arginine/serine-rich 8 Suppressor-of-white-apricot	PF01805: Surp module; PF09750: Alternative splicing regulator		NOT WBPheno: Bmd; Emb; Gro; Let; Lva; Lvl; Ste; Stp; Variant; embryonic development variant; nicotine response variant; postembryonic development variant
WBGene00019143|H01M10.1	7.27	0.72	10.1		259 aa						NOT WBPheno: Bmd; Emb; Let; Ste; Variant; postembryonic development variant
WBGene00008989|F20G2.6	1.31	0.13	10.08		170-218 aa	SignalP; Tmhmm; Seg
WBGene00002026|C12C8.1|hsp-70	1.31	0.13	10.08		643 aa	Seg; Ncoils		COG0443: Molecular chaperone; KOG0101: Molecular chaperones HSP70/HSC70, HSP70 superfamily; meNOG13955: Heat shock-related 70 kDa protein 2 Heat shock	PF00012: Hsp70 protein; PF06723: MreB/Mbl protein	WBPhenotype: Age	NOT WBPheno: Bmd; Emb; Let; Ste; Variant; postembryonic development variant
WBGene00001231|C41D11.2|eif-3.H	10.46	1.04	10.06		365 aa	Ncoils		KOG1560: Translation initiation factor 3, subunit h (eIF-3h); meNOG06462: Eukaryotic translation initiation factor 3, subunit	PF01398: Mov34/MPN/PAD-1 family	WBPhenotype: Emb; Gro; Lvl; Unc; axon fasciculation variant; cord commissures fail to reach target; pattern of transgene expression variant; receptor mediated endocytosis defective	NOT WBPheno: Bmd; Ste; Variant
WBGene00008121|C46F11.6	4.11	0.41	10.02		121 aa			NOG71018: Ubiquitin-Like protein; euNOG09399: Ubiquitin-Like protein; meNOG19136: Ubiquitin-Like protein
WBGene00044442|T08A9.13	0.3	0	10		120 aa	Seg; Ncoils		KOG1340: Prosaposin
WBGene00019279|K01A2.4	0.3	0	10		273 aa	Tmhmm; Seg					NOT WBPheno: Bmd; Emb; Let; Ste; Variant; postembryonic development variant
WBGene00009964|F53B6.9|fip-6	0.3	0	10		75 aa	SignalP; Tmhmm; Seg					NOT WBPheno: Bmd; Emb; Ste; Variant
WBGene00008484|E04D5.5	0.3	0	10		73 aa	SignalP; Tmhmm; Seg
WBGene00008065|C43C3.2|npr-18	0.3	0	10	OMIM:102200 [PITUITARY ADENOMA, GROWTH HORMONE-SECRETING]	498 aa	Tmhmm		KOG3656: FOG: 7 transmembrane receptor	PF00001: 7 transmembrane receptor (rhodopsin family)		NOT WBPheno: Bmd; Egl; Emb; Gro; Lva; Lvl; Ste; Stp; Unc; Variant; organism pathogen response variant; postembryonic development variant
WBGene00004903|Y46G5A.25|snf-4	6.29	0.63	9.98					COG0733: Na+-dependent transporters of the SNF family; KOG3660: Sodium-neurotransmitter symporter; meNOG05836: Transporter protein			NOT WBPheno: Bmd; Emb; Let; Ste; Variant; postembryonic development variant
WBGene00018725|F53A9.2	1.59	0.16	9.94		83 aa	Seg					NOT WBPheno: Bmd; Emb; Gro; Lva; Lvl; Ste; Stp; Variant; postembryonic development variant
WBGene00015536|C06E4.7|glb-2	1.38	0.14	9.86		230 aa						NOT WBPheno: Bmd; Emb; Gro; Let; Lva; Lvl; Ste; Stp; Variant; postembryonic development variant
WBGene00000200|K07C5.1|arx-2	1080.64	109.85	9.84		395 aa	Seg		COG5277: Actin and related proteins; KOG0677: Actin-related protein Arp2/3 complex, subunit Arp2; meNOG04963: Functions as ATP-binding component of the Arp2/3 complex which is involved in regulation of actin polymerization and together with an activating nucleation-promoting factor (NPF) mediates the formation of branched actin networks. Seems to contact the pointed end of the daughter actin	PF00022: Actin	WBPhenotype: Clr; Egl D; Emb; Gro; Let; Lva; Unc; cleavage furrow initiation defective early emb; embryonic development variant; engulfment variant; intestinal development variant; intestinal morphology variant; meiosis variant; pattern of transgene expression variant; pharynx disorganized; receptor mediated endocytosis defective; transgene subcellular localization variant; ventral enclosure vari…	NOT WBPheno: Bmd; Ste; Variant; germ cell morphology variant; reduced brood size; seam cell fusion variant
WBGene00020039|R12E2.14	4.62	0.47	9.83		74 aa	SignalP; Seg					NOT WBPheno: Bmd; Emb; Gro; Let; Lva; Lvl; Ste; Stp; Variant; postembryonic development variant
WBGene00017925|F29B9.11	422.9	43.25	9.78		88 aa	Tmhmm				WBPhenotype: Emb; Gro; Lva; Ste; Stp; fat content reduced; growth rate variant; reduced brood size	NOT WBPheno: fat content variant
WBGene00001401|H12I13.4|fbf-1	168.94	17.29	9.77		614 aa	Seg		COG5099: RNA-binding protein of the Puf family, translational repressor; KOG1488: Translational repressor Pumilio/PUF3 and related RNA-binding proteins (Puf superfamily); meNOG05370: Pumilio homolog protein	PF00806: Pumilio-family RNA binding repeat	WBPhenotype: Mog; Muv; Stp	NOT WBPheno: Bmd; Emb; Ste; Variant
WBGene00008246|C50H2.13	20.85	2.15	9.7		183 aa	Tmhmm; Seg
WBGene00007604|C15C8.1	17.24	1.78	9.69		441 aa	Tmhmm; Seg					NOT WBPheno: Emb; Gro; Let; Lva; Lvl; Ste; Stp; Variant; postembryonic development variant
WBGene00017128|E04F6.9	0.29	0	9.67		128 aa	SignalP					NOT WBPheno: Bmd; Emb; Gro; Let; Lva; Lvl; Ste; Stp; Variant; postembryonic development variant
WBGene00001927|F07B7.3|his-53	0.29	0	9.67		127 aa	Seg		COG5262: Histone H2A; KOG1756: Histone 2A	PF00125: Core histone H2A/H2B/H3/H4; PF00808: Histone-like transcription factor (CBF/NF-Y) and archaeal histone
WBGene00001925|F07B7.10|his-51	0.29	0	9.67		127 aa	Seg		COG5262: Histone H2A; KOG1756: Histone 2A	PF00125: Core histone H2A/H2B/H3/H4; PF00808: Histone-like transcription factor (CBF/NF-Y) and archaeal histone
WBGene00001895|K06C4.3|his-21	0.29	0	9.67		127 aa	Seg		COG5262: Histone H2A; KOG1756: Histone 2A	PF00125: Core histone H2A/H2B/H3/H4; PF00808: Histone-like transcription factor (CBF/NF-Y) and archaeal histone
WBGene00001893|K06C4.11|his-19	0.29	0	9.67		127 aa	Seg		COG5262: Histone H2A; KOG1756: Histone 2A	PF00125: Core histone H2A/H2B/H3/H4; PF00808: Histone-like transcription factor (CBF/NF-Y) and archaeal histone
WBGene00001881|F45F2.4|his-7	0.29	0	9.67		127 aa	Seg		COG5262: Histone H2A; KOG1756: Histone 2A	PF00125: Core histone H2A/H2B/H3/H4; PF00808: Histone-like transcription factor (CBF/NF-Y) and archaeal histone	WBPhenotype: Emb; Let; Lva; Lvl; Ste; thin
WBGene00014088|ZK809.8	25.86	2.68	9.65		55-64 aa	SignalP; Tmhmm; Seg
WBGene00018072|F35H10.7	108.7	11.28	9.64		511 aa	Seg		KOG3830: Uncharacterized conserved protein; meNOG05887: Alpha globin regulatory element-containing gene protein	PF03666: Nitrogen Permease regulator of amino acid transport activity 3	WBPhenotype: Rup; protein aggregation variant; transgene subcellular localization variant	NOT WBPheno: Bmd; Emb; Gro; Lva; Lvl; Ste; Stp; Variant; postembryonic development variant
WBGene00019305|K02D10.5|snap-29	198.09	20.57	9.63	OMIM:609528 [CEREBRAL DYSGENESIS, NEUROPATHY, ICHTHYOSIS, AND PALMOPLANTAR KERATODERMA]	277 aa	Seg; Ncoils		KOG3065: SNAP-25 (synaptosome-associated protein) component of SNARE complex; meNOG14189: Synaptosomal-Associated protein	PF05739: SNARE domain	WBPhenotype: Emb; Let; Lva; Ste; Var
WBGene00019734|M02E1.2	14.84	1.55	9.57		84 aa	SignalP; Tmhmm					NOT WBPheno: Bmd; Emb; Ste; Variant
WBGene00015907|C17F3.1	2.68	0.28	9.57		88 aa	SignalP; Tmhmm; Seg				WBPhenotype: axon fasciculation variant; axon midline crossing variant; cord commissures fail to reach target; ventral cord patterning variant	NOT WBPheno: Bmd; Emb; Gro; Lva; Lvl; Ste; Stp; Variant; postembryonic development variant
WBGene00044169|C06C3.10	6.31	0.66	9.56		96 aa	SignalP; Seg
WBGene00023492|T24D3.2	51.29	5.39	9.52		70 aa	Seg
WBGene00006737|Y38A8.3|ulp-2	4.08	0.43	9.49		893 aa	Seg		COG5160: Protease, Ulp1 family; KOG0779: Protease, Ulp1 family; meNOG14885: Sentrin/Sumo-Specific protease senp7	PF02902: Ulp1 protease family, C-terminal catalytic domain	WBPhenotype: Emb; Gro; Lva; Sck; Ste; Stp; growth rate variant; reduced brood size	NOT WBPheno: Bmd; Let; Lvl; Variant; postembryonic development variant
WBGene00011732|T12D8.4|arrd-17	86.87	9.29	9.35		426 aa			KOG3780: Thioredoxin binding protein TBP-2/VDUP1; meNOG10165: Arrestin domain containing protein	PF00339: Arrestin (or S-antigen), N-terminal domain; PF02752: Arrestin (or S-antigen), C-terminal domain		NOT WBPheno: Bmd; Emb; Let; Ste; Variant; embryonic development variant; postembryonic development variant
WBGene00019009|F57C9.2|clec-90	0.28	0	9.33		205 aa	SignalP; Tmhmm; Seg					NOT WBPheno: Bmd; Emb; Let; Ste; Variant; gut granule development variant; postembryonic development variant
WBGene00018476|F45E12.6	0.28	0	9.33		67 aa	SignalP; Seg					NOT WBPheno: Bmd; Emb; Gro; Let; Lva; Lvl; Ste; Stp; Variant; postembryonic development variant
WBGene00018349|F42C5.9	15.42	1.66	9.29		552 aa			COG5277: Actin and related proteins; KOG0676: Actin and related proteins; meNOG24786: Actins are highly proteins that are involved in various types of cell motility and are ubiquitously expressed in all eukaryotic	PF00022: Actin	WBPhenotype: body wall muscle myosin organization defective; pattern of transgene expression variant; receptor mediated endocytosis defective; transgene subcellular localization variant	NOT WBPheno: Bmd; Emb; Gro; Let; Lva; Lvl; Ste; Stp; Variant; postembryonic development variant
WBGene00010559|K04D7.6	1.3	0.14	9.29		360 aa	Tmhmm; Seg
WBGene00001758|Y45G12C.2|gst-10	289.34	31.15	9.29		210 aa			KOG1695: Glutathione S-transferase; meNOG15386: Glutathione protein	PF00043: Glutathione S-transferase, C-terminal domain; PF02798: Glutathione S-transferase, N-terminal domain		NOT WBPheno: Bmd; Emb; Let; Ste; Variant; postembryonic development variant; protein expression variant
WBGene00020858|T27C10.3|mop-25.3	16.79	1.81	9.28		339 aa			KOG1566: Conserved protein Mo25	PF08569: Mo25-like		NOT WBPheno: Bmd; Emb; Gro; Let; Lva; Lvl; Ste; Stp; Variant; postembryonic development variant
WBGene00020860|T27C10.7|nspd-10	12.51	1.35	9.27		73 aa	Seg
WBGene00020444|T12B3.1	2.13	0.23	9.26		446 aa			COG2453: Predicted protein-tyrosine phosphatase; KOG1720: Protein tyrosine phosphatase CDC14; meNOG07403: Protein tyrosine phosphatase domain containing	PF00102: Protein-tyrosine phosphatase; PF00782: Dual specificity phosphatase, catalytic domain		NOT WBPheno: Bmd; Emb; Let; Ste; Variant; postembryonic development variant
WBGene00009306|F32A7.5	10.44	1.13	9.24		764-878 aa	Seg		KOG3592: Microtubule-associated proteins		WBPhenotype: Ste	NOT WBPheno: Bmd; Emb; Let; Variant; postembryonic development variant
WBGene00018267|F41C3.1	3.6	0.39	9.23		129 aa				PF06887: Protein of unknown function (DUF1265)		NOT WBPheno: Bmd; Emb; Gro; Lva; Lvl; Ste; Stp; Variant; postembryonic development variant
WBGene00001612|C06E1.4|glr-1	1.2	0.13	9.23	OMIM:300699 [MENTAL RETARDATION, X-LINKED, SYNDROMIC, WU TYPE; MRXSW]	962 aa	SignalP; Tmhmm; Seg		KOG1054: Glutamate-gated AMPA-type ion channel receptor subunit GluR2 and related subunits; meNOG06464: Glutamate receptor	PF00060: Ligand-gated ion channel; PF00497: Bacterial extracellular solute-binding proteins, family 3; PF01094: Receptor family ligand binding region; PF10613: Ligated ion channel L-glutamate- and glycine-binding site	WBPhenotype: aqueous adaptation defective; associative learning variant; evoked postsynaptic current variant; fat content variant; foraging behavior variant; nose touch defective; osmotic stress response variant	NOT WBPheno: Bmd; Egl D; Emb; Gro; Lva; Lvl; Ste; Stp; Variant; carbon dioxide avoidance variant; dopamine adaptation variant; embryonic development variant; enhanced taste aversion defective; memory retention defective; pharyngeal pumping reduced; postembryonic development variant; sodium chloride chemotaxis defective; sodium chloride chemotaxis variant
WBGene00015755|C14B9.10	37.91	4.12	9.2		60 aa	Tmhmm		KOG0190: Protein disulfide isomerase (prolyl 4-hydroxylase beta subunit)	PF05365: Ubiquinol-cytochrome C reductase, UQCRX/QCR9 like	WBPhenotype: Emb	NOT WBPheno: Bmd; Ste; Variant
WBGene00017813|F26A10.1	24.39	2.66	9.17		55 aa	SignalP; Tmhmm; Seg					NOT WBPheno: Bmd; Emb; Let; Ste; Variant; postembryonic development variant
WBGene00016788|C49G7.10	15.05	1.65	9.12	OMIM:132810 [EPOXIDE HYDROLASE 1, MICROSOMAL; EPHX1]; OMIM:189800 [PREECLAMPSIA/ECLAMPSIA 1; PEE1]; OMIM:607748 [HYPERCHOLANEMIA, FAMILIAL; FHCA]	292 aa	Seg					NOT WBPheno: Bmd; Emb; Gro; Let; Lva; Lvl; Ste; Stp; Variant; postembryonic development variant
WBGene00013521|Y73F8A.12	92.15	10.12	9.11		129 aa						NOT WBPheno: Bmd; Emb; Let; Ste; Variant; postembryonic development variant
WBGene00013083|Y51A2D.18	18.23	2.02	9.02	OMIM:180300 [RHEUMATOID ARTHRITIS; RA]; OMIM:212140 [CARNITINE DEFICIENCY, SYSTEMIC PRIMARY; CDSP]; OMIM:266600 [INFLAMMATORY BOWEL DISEASE 1; IBD1]	550 aa	Tmhmm; Seg		COG0477: Permeases of the major facilitator superfamily; KOG0255: Synaptic vesicle transporter SVOP and related transporters (major facilitator superfamily)	PF00083: Sugar (and other) transporter; PF07690: Major Facilitator Superfamily		NOT WBPheno: Bmd; Emb; Let; Ste; Variant; postembryonic development variant
WBGene00020058|R13D11.4	1.98	0.22	9		387 aa	Tmhmm; Seg		KOG0134: NADH:flavin oxidoreductase/12-oxophytodienoate reductase			NOT WBPheno: Bmd; Emb; Ste; Variant
WBGene00019934|R07C12.4	0.27	0	9		254 aa
WBGene00015453|C04G6.2	0.72	0.08	9	OMIM:147050 [IgE RESPONSIVENESS, ATOPIC; IGER]	170 aa	SignalP; Seg					NOT WBPheno: Bmd; Emb; Ste; Variant
WBGene00004151|T16G1.10|pqn-68	1.98	0.22	9		150 aa			COG1490: D-Tyr-tRNAtyr deacylase; KOG3323: D-Tyr-tRNA (Tyr) deacylase; meNOG09949: D-Tyrosyl-Trna(Tyr) protein	PF02580: D-Tyr-tRNA(Tyr) deacylase	WBPhenotype: protein aggregation variant	NOT WBPheno: Bmd; Emb; Gro; Let; Lva; Lvl; Ste; Stp; Variant; postembryonic development variant
WBGene00015937|C17H12.12	28.58	3.18	8.99		632 aa				PF00651: BTB/POZ domain		NOT WBPheno: Bmd; Emb; Gro; Lva; Lvl; Ste; Stp; Variant; postembryonic development variant
WBGene00001932|F54E12.4|his-58	2.69	0.3	8.97		123 aa	Seg		KOG1744: Histone H2B; meNOG20185: Histone H2B protein	PF00125: Core histone H2A/H2B/H3/H4; PF00808: Histone-like transcription factor (CBF/NF-Y) and archaeal histone
WBGene00022371|Y92H12BR.6|set-29	44.54	5	8.91		401 aa	Seg		KOG1337: N-methyltransferase; meNOG09331: SET domain containing protein	PF00856: SET domain		NOT WBPheno: Bmd; Emb; Let; Ste; Variant
WBGene00010350|H01G02.3	14.15	1.59	8.9		139-208 aa	SignalP; Tmhmm; Seg
WBGene00015087|B0252.1	3.55	0.4	8.87		727 aa	SignalP; Tmhmm; Seg		COG0515: Serine/threonine protein kinase; KOG0200: Fibroblast/platelet-derived growth factor receptor and related receptor tyrosine kinases	PF00069: Protein kinase domain; PF07714: Protein tyrosine kinase		NOT WBPheno: Bmd; Emb; Let; Ste; Variant; postembryonic development variant
WBGene00008944|F19B2.5	583.58	66.19	8.82		144 aa			KOG1001: Helicase-like transcription factor HLTF/DNA helicase RAD5, DEAD-box superfamily			NOT WBPheno: Bmd; Emb; Gro; Let; Ste; Variant; postembryonic development variant
WBGene00020192|T03F1.11	5	0.57	8.77		81 aa				PF00036: EF hand		NOT WBPheno: Bmd; Emb; Let; Ste; Variant; postembryonic development variant
WBGene00011289|R102.2	72.53	8.27	8.77		125 aa	Seg					NOT WBPheno: Bmd; Emb; Let; Ste; Variant; postembryonic development variant
WBGene00004461|F10G7.8|rpn-5	2641.95	302.04	8.75		490 aa	Seg		COG5071: 26S proteasome regulatory complex component; KOG1498: 26S proteasome regulatory complex, subunit RPN5/PSMD12; meNOG04480: Proteasome protein	PF01399: PCI domain	WBPhenotype: Emb; Sck; Ste	NOT WBPheno: Gro; Let; Lva; Lvl; Stp; Variant; postembryonic development variant; protein aggregation variant; transgene subcellular localization variant
WBGene00013354|Y59A8B.22|snx-6	2.62	0.3	8.73		133-478 aa	Seg; Ncoils		KOG1660: Sorting nexin SNX6/TFAF2, contains PX domain; meNOG05633: Sorting nexin protein	PF00787: PX domain; PF09325: Vps5 C terminal like		NOT WBPheno: Bmd; Emb; Let; Ste; Variant; postembryonic development variant
WBGene00010055|F54D5.12	1007.37	115.33	8.73	OMIM:600721 [D-2-@HYDROXYGLUTARIC ACIDURIA 1]	487 aa			COG0277: FAD/FMN-containing dehydrogenases; KOG1232: Proteins containing the FAD binding domain; meNOG04814: D-2-Hydroxyglutarate protein	PF01565: FAD binding domain; PF02913: FAD linked oxidases, C-terminal domain		NOT WBPheno: Bmd; Emb; Gro; Let; Lva; Lvl; Ste; Stp; Variant; postembryonic development variant
WBGene00007972|C36B1.5|prp-4	7.56	0.87	8.69		496 aa	Seg		COG2319: FOG: WD40 repeat; KOG0272: U4/U6 small nuclear ribonucleoprotein Prp4 (contains WD40 repeats); meNOG04282: U4/U6 small nuclear ribonucleoprotein Prp4	PF00400: WD domain, G-beta repeat; PF08799: pre-mRNA processing factor 4 (PRP4) like	WBPhenotype: Emb; Gro; Led; Let; Lva; Pvl; Ste; Unc; cell proliferation increased; excess intestinal cells; late embryonic arrest	NOT WBPheno: Sck; growth variant
WBGene00001910|C50F4.6	314.54	36.25	8.68		92 aa	Seg					NOT WBPheno: Bmd; Emb; Gro; Let; Lva; Lvl; Ste; Stp; Variant; postembryonic development variant
WBGene00008564|F08A8.1|acox-1	0.26	0	8.67	OMIM:264470 [PEROXISOMAL ACYL-CoA OXIDASE DEFICIENCY]	562-674 aa			COG1960: Acyl-CoA dehydrogenases; KOG0136: Acyl-CoA oxidase; meNOG07186: Acyl-Coenzyme A oxidase 1	PF01756: Acyl-CoA oxidase; PF02770: Acyl-CoA dehydrogenase, middle domain		NOT WBPheno: Bmd; Emb; Gro; Lva; Lvl; Ste; Stp; Variant; postembryonic development variant
WBGene00004890|D1037.2|smp-2	0.26	0	8.67	OMIM:607961 [SEMAPHORIN 7A; SEMA7A]	654 aa	SignalP; Tmhmm; Seg		KOG3611: Semaphorins; meNOG05607: Semaphorin protein	PF01403: Sema domain	WBPhenotype: Mab	NOT WBPheno: Bmd; Emb; Ste; Variant; anchor cell invasion variant
WBGene00003818|H15N14.2|nsf-1	0.26	0	8.67		758-824 aa	Seg		COG0464: ATPases of the AAA+ class; KOG0741: AAA+-type ATPase; meNOG04901: Fusion protein	PF00004: ATPase family associated with various cellular activities (AAA); PF02359: Cell division protein 48 (CDC48), N-terminal domain; PF02933: Cell division protein 48 (CDC48), domain 2; PF07724: AAA domain (Cdc48 subfamily)	WBPhenotype: Emb; Let; Lva; Lvl; Ste; Unc; body wall muscle myosin organization defective; cell secretion variant; pattern of transgene expression variant; protein aggregation variant; receptor mediated endocytosis defective; transgene subcellular localization variant	NOT WBPheno: endoplasmic reticulum morphology variant; germ cell morphology variant; reduced brood size
WBGene00002017|T27E4.2|hsp-16.11	0.26	0	8.67	OMIM:608810 [MYOPATHY, MYOFIBRILLAR, 2, MFM2]; OMIM:613763 [CATARACT, POSTERIOR POLAR, 2; CTPP2]; OMIM:613869 [MYOPATHY, MYOFIBRILLAR, FATAL INFANTILE HYPERTONIC, ALPHA-B CRYSTALLIN-RELATED]	145 aa			KOG3591: Alpha crystallins	PF00011: Hsp20/alpha crystallin family		NOT WBPheno: Bmd; Emb; Let; Ste; Variant; postembryonic development variant
WBGene00017613|F20A1.1	24.19	2.8	8.64		113 aa	SignalP; Seg					NOT WBPheno: Bmd; Emb; Gro; Let; Lva; Lvl; Ste; Stp; Variant; postembryonic development variant
WBGene00000097|F58E10.4|aip-1	374.13	43.37	8.63		202 aa			KOG3183: Predicted Zn-finger protein; meNOG17047: An1-Type zinc finger protein	PF01428: AN1-like Zinc finger	WBPhenotype: Prl; organism toxic chemical response variant; protein aggregation variant	NOT WBPheno: Bmd; Emb; Gro; Let; Lva; Lvl; Ste; Stp; Variant; postembryonic development variant
WBGene00011507|T05H10.1	8.87	1.03	8.61		1326 aa	Seg; Ncoils		COG5077: Ubiquitin carboxyl-terminal hydrolase; KOG4598: Putative ubiquitin-specific protease; meNOG05196: Ubiquitin thioesterase 47 (Ubiquitin-specific-processing protease 47)	PF00443: Ubiquitin carboxyl-terminal hydrolase		NOT WBPheno: Bmd; Emb; Gro; Let; Lva; Lvl; Ste; Stp; Variant; postembryonic development variant; protein aggregation variant; transgene subcellular localization variant
WBGene00008266|C53A5.6	19.08	2.22	8.59	OMIM:611185 [RESTLESS LEGS SYNDROME, SUSCEPTIBILITY TO, 6]	570-573 aa	Seg		KOG4441: Proteins containing BTB/POZ and Kelch domains, involved in regulatory/signal transduction processes	PF01344: Kelch motif	WBPhenotype: Let; Lva; Lvl; Sck; Ste	NOT WBPheno: Bmd; Emb; Variant
WBGene00021387|Y37F4.6	6.77	0.79	8.57		391 aa		Thomas+W_TF
WBGene00022420|Y102E9.2	7.45	0.87	8.56		388-391 aa	Ncoils		KOG3914: WD repeat protein WDR4; meNOG13123: WD repeat protein			NOT WBPheno: Bmd; Emb; Gro; Let; Lva; Lvl; Ste; Stp; Variant; embryonic development variant; postembryonic development variant
WBGene00010849|M04B2.7	0.77	0.09	8.56		168-216 aa	Tmhmm; Seg
WBGene00004152|T19B10.4|pqn-70	5122.02	598.67	8.56		125-243 aa	Seg				WBPhenotype: Let; RNAi resistant; Ste; somatic transgene silencing variant; transgene expression increased	NOT WBPheno: Bmd; Emb; Gro; Lva; Lvl; Stp; Variant; postembryonic development variant
WBGene00006573|Y66D12A.22|tin-10	4.96	0.58	8.55		86 aa			KOG3480: Mitochondrial import inner membrane translocase, subunits TIM10/TIM12; meNOG20474: Mitochondrial protein	PF02953: Tim10/DDP family zinc finger	WBPhenotype: Emb; Pvl; Sck; Unc; growth variant; mitochondrial metabolism variant; reduced brood size; small	NOT WBPheno: Bmd; Ste; Variant
WBGene00004447|F10E7.7|rpl-33	4248.5	496.88	8.55	OMIM:612528 [DIAMOND-BLACKFAN ANEMIA 5; DBA5]	124 aa			COG2451: Ribosomal protein L35AE/L33A; KOG0887: 60S ribosomal protein L35A/L37; meNOG19452: Ribosomal protein L35a	PF01247: Ribosomal protein L35Ae	WBPhenotype: Clr; Emb; Gro; Lva; Sck; Slu; Stp
WBGene00013091|Y51B9A.9	2.12	0.25	8.48	OMIM:606369 [EPILEPTIC ENCEPHALOPATHY, LENNOX-GASTAUT TYPE]	381 aa			COG0515: Serine/threonine protein kinase; KOG0665: Jun-N-terminal kinase (JNK); meNOG04051: Mitogen activated protein kinase	PF00069: Protein kinase domain; PF07714: Protein tyrosine kinase		NOT WBPheno: Bmd; Emb; Let; Ste; Variant; postembryonic development variant
WBGene00022629|ZC513.5	4.45	0.53	8.4	OMIM:607143 [CONGENITAL DISORDER OF GLYCOSYLATION, TYPE Ig; CDG1G]	492 aa	SignalP; Tmhmm; Seg		KOG2516: Protein involved in dolichol pathway for N-glycosylation (mannosyltransferase family); meNOG05730: Dolichyl-P-Man:Man(7)Glcnac-Pp-Dolichyl-Alpha-1,6- mannosyltransferase	PF03901: Alg9-like mannosyltransferase family		NOT WBPheno: Emb; Let; Variant; postembryonic development variant
WBGene00017490|F15E11.1	8.74	1.04	8.4		154 aa			NOG116172: Annotation not available			NOT WBPheno: Emb; Gro; Lva; Lvl; Ste; Stp; Variant; cadmium hypersensitive; postembryonic development variant
WBGene00009880|F49C12.11	189.7	22.59	8.4		64 aa	Seg; Ncoils				WBPhenotype: Bmd; Dpy; Emb; Gro; Lva; Lvl; Unc	NOT WBPheno: Let; Ste; Variant; postembryonic development variant; protein aggregation variant; transgene subcellular localization variant
WBGene00014100|ZK849.1	5.62	0.67	8.39	OMIM:607084 [DEAFNESS, AUTOSOMAL RECESSIVE 31; DFNB31]; OMIM:611383 [USHER SYNDROME, TYPE IID; USH2D]	331 aa			KOG3528: FOG: PDZ domain; meNOG05810: Golgi associated PDZ and coiled-coil motif containing protein	PF00595: PDZ domain (Also known as DHR or GLGF)		NOT WBPheno: Emb; Gro; Let; Lva; Lvl; Ste; Stp; Variant; postembryonic development variant
WBGene00009620|F41E7.4|fip-5	7.37	0.88	8.38		74 aa	SignalP; Seg					NOT WBPheno: Bmd; Emb; Gro; Let; Lva; Lvl; Ste; Stp; Variant; postembryonic development variant
WBGene00017074|D2096.7	23.83	2.85	8.36		136-349 aa	Seg					NOT WBPheno: Bmd; Emb; Gro; Lva; Lvl; Ste; Stp; Variant; glp; postembryonic development variant
WBGene00045336|R11D1.12	0.25	0	8.33		31-74 aa	SignalP; Tmhmm; Seg
WBGene00020899|T28D9.11	76.98	9.24	8.33		61 aa
WBGene00002136|F07A5.1|inx-14	4.15	0.5	8.3		432-434 aa	Tmhmm			PF00876: Innexin	WBPhenotype: Age; Emb; Let; Ste; fat content reduced	NOT WBPheno: Adl; Gro; Lva; Lvl; Stp; Unc; Variant; fat content variant; postembryonic development variant
WBGene00018259|F41B4.3	15.52	1.88	8.26		134 aa	Tmhmm; Seg					NOT WBPheno: Bmd; Emb; Let; Ste; Variant; postembryonic development variant
WBGene00001998|F32A11.2|hpr-17	0.82	0.1	8.2		514 aa	Seg		KOG1970: Checkpoint RAD17-RFC complex, RAD17/RAD24 component; meNOG07952: Cell cycle checkpoint protein rad17		WBPhenotype: Gro; cell cycle variant; induced cell death variant; organism hypersensitive ionizing radiation; spontaneous mutation rate increased	NOT WBPheno: Bmd; Emb; Let; Lva; Lvl; Ste; Stp; Variant; postembryonic development variant; protein subcellular localization variant
WBGene00011309|R186.8	28.8	3.52	8.18		71 aa
WBGene00000975|K08F4.9|dhs-12	151.26	18.57	8.15		255 aa	Seg		COG1028: Dehydrogenases with different specificities (related to short-chain alcohol dehydrogenases); KOG1611: Predicted short chain-type dehydrogenase; meNOG18583: Annotation not available	PF00106: short chain dehydrogenase		NOT WBPheno: Bmd; Emb; Gro; Let; Lva; Lvl; Ste; Stp; Variant; postembryonic development variant
WBGene00007645|C17E4.6	4.56	0.56	8.14		391 aa	Seg	Thomas+W_TF	KOG2897: DNA-binding protein YL1 and related proteins; meNOG10916: Vacuolar protein sorting-associated protein 72 homolog (Transcription factor-like 1)	PF05764: YL1 nuclear protein; PF08265: YL1 nuclear protein C-terminal domain	WBPhenotype: Let; Muv; Ste	NOT WBPheno: Bmd; Emb; Gro; Lva; Lvl; Stp; Variant; organism UV hypersensitive; postembryonic development variant
WBGene00001425|F13B9.8|fis-2	33.04	4.06	8.14		138-151 aa	Tmhmm; Seg		KOG3364: Membrane protein involved in organellar division; meNOG19870: Mitochondrial fission 1 protein		WBPhenotype: Ste	NOT WBPheno: Bmd; Emb; Gro; Let; Lva; Lvl; Stp; Variant; postembryonic development variant
WBGene00008988|F20G2.5	1.05	0.13	8.08		467 aa	Seg			PF02408: CUB-like domain	WBPhenotype: Esp	NOT WBPheno: Bmd; Emb; Gro; Let; Lva; Lvl; Ste; Stp; Variant; postembryonic development variant
WBGene00009222|F28F8.4|fbxa-95	1.53	0.19	8.05		321 aa				PF00646: F-box domain; PF01827: FTH domain		NOT WBPheno: Bmd; Emb; Ste; Variant
WBGene00000547|Y77E11A.11|clp-7	82.36	10.25	8.04		778 aa	Seg		KOG0045: Cytosolic Ca2+-dependent cysteine protease (calpain), large subunit (EF-Hand protein superfamily); meNOG04113: EC 3.4.22 protein	PF00648: Calpain family cysteine protease; PF01067: Calpain large subunit, domain III		NOT WBPheno: Bmd; Emb; Gro; Let; Lva; Lvl; Ste; Stp; Variant; postembryonic development variant
WBGene00017075|D2096.8	3968.81	494.97	8.02		316 aa	Seg		KOG1507: Nucleosome assembly protein NAP-1; meNOG07250: Nucleosome assembly protein	PF00956: Nucleosome assembly protein (NAP)	WBPhenotype: Bmd; Emb; Gro; Let; Lva; Lvl; Pvl; RNAi resistant; Rup; Ste; Stp; Unc; protein aggregation variant; small; somatic transgene silencing variant; transgene expression increased; transposon silencing variant	NOT WBPheno: Variant
WBGene00022875|ZK1248.4	0.24	0	8		77 aa
WBGene00022574|ZC239.16	0.24	0	8		155 aa	Tmhmm; Seg		KOG2716: Polymerase delta-interacting protein PDIP1 and related proteins, contain BTB/POZ domain	PF00651: BTB/POZ domain; PF02214: K+ channel tetramerisation domain		NOT WBPheno: Bmd; Emb; Gro; Let; Lva; Lvl; Ste; Stp; Variant; postembryonic development variant
WBGene00019409|K05F1.8	0.24	0	8		78 aa	Tmhmm; Seg					NOT WBPheno: Bmd; Emb; Gro; Let; Lva; Lvl; Ste; Stp; Variant; postembryonic development variant
WBGene00015179|B0416.3	0.24	0	8		210 aa	Tmhmm; Seg					NOT WBPheno: Bmd; Emb; Gro; Let; Lva; Lvl; Ste; Stp; Variant; postembryonic development variant
WBGene00008929|F18A11.2	0.24	0	8		388 aa	Seg		KOG1471: Phosphatidylinositol transfer protein SEC14 and related proteins; meNOG10781: Sec14-Like protein	PF00650: CRAL/TRIO domain		NOT WBPheno: Bmd; Emb; Gro; Let; Lva; Lvl; Ste; Stp; Variant; postembryonic development variant
WBGene00001745|R06A10.2|gsa-1	0.56	0.07	8	OMIM:102200 [PITUITARY ADENOMA, GROWTH HORMONE-SECRETING]; OMIM:103580 [PSEUDOHYPOPARATHYROIDISM, TYPE IA; PHP1A]; OMIM:114500 [COLORECTAL CANCER; CRC]; OMIM:139320 [GNAS COMPLEX LOCUS; GNAS]; OMIM:166350 [OSSEOUS HETEROPLASIA, PROGRESSIVE; POH]; OMIM:174800 [MCCUNE-ALBRIGHT SYNDROME; MAS]; OMIM:219080 [ACTH-INDEPENDENT MACRONODULAR ADRENAL HYPERPLASIA; AIMAH]; OMIM:219090 [PITUITARY ADENOMA, ACT…	375 aa	Seg		KOG0099: G protein subunit Galphas, small G protein superfamily; meNOG05075: Protein involved in G-protein coupled receptor protein signaling pathway	PF00025: ADP-ribosylation factor family; PF00503: G-protein alpha subunit	WBPhenotype: Age; Egl; Egl D; Gro; Lvl; Oma; Pvl; Ric; Rup; Sck; Slu; Ste; Stp; Unc; inhibition of oocyte maturation variant; pattern of transgene expression variant; receptor mediated endocytosis defective; transgene expression increased; transgene subcellular localization variant	NOT WBPheno: Bmd; Emb; Lva; Variant; postembryonic development variant
WBGene00000885|T27D1.1|cyn-9	0.48	0.06	8		309 aa	Seg; Ncoils		COG0652: Peptidyl-prolyl cis-trans isomerase (rotamase) - cyclophilin family; KOG0546: HSP90 co-chaperone CPR7/Cyclophilin; meNOG09927: Peptidyl prolyl protein	PF00160: Cyclophilin type peptidyl-prolyl cis-trans isomerase/CLD		NOT WBPheno: Bmd; Emb; Gro; Let; Lva; Lvl; Ste; Stp; Variant; postembryonic development variant; protein aggregation variant; transgene subcellular localization variant
WBGene00003074|ZK524.3|lars-2	97.03	12.14	7.99		455-859 aa	Seg; Ncoils		COG0495: Leucyl-tRNA synthetase; KOG0435: Leucyl-tRNA synthetase; meNOG05783: Leucyl-Trna synthetase	PF00133: tRNA synthetases class I (I, L, M and V); PF08264: Anticodon-binding domain; PF09334: tRNA synthetases class I (M)	WBPhenotype: Emb; Gro; Ste; developmental delay postembryonic; reduced brood size
WBGene00002048|B0244.2|ida-1	41.31	5.18	7.97		767 aa	SignalP; Tmhmm; Seg; Ncoils		COG5599: Protein tyrosine phosphatase; KOG0793: Protein tyrosine phosphatase; meNOG04017: Receptor type	PF00102: Protein-tyrosine phosphatase		NOT WBPheno: Bmd; Emb; Gro; Let; Lva; Lvl; Ste; Stp; Variant; embryonic development variant; postembryonic development variant
WBGene00012564|Y37H2A.4|fbxa-107	16.59	2.09	7.94		317 aa				PF00646: F-box domain; PF01827: FTH domain		NOT WBPheno: Bmd; Emb; Let; Ste; Variant; postembryonic development variant
WBGene00011078|R07B1.6	0.95	0.12	7.92		136 aa	SignalP; Seg			PF01681: C6 domain		NOT WBPheno: Bmd; Emb; Gro; Lva; Lvl; Ste; Stp; Variant; postembryonic development variant
WBGene00011280|R74.6	0.63	0.08	7.88		381 aa	Seg		COG1537: Predicted RNA-binding proteins; KOG2869: Meiotic cell division protein Pelota/DOM34; meNOG05141: Pelota homolog protein	PF03464: eRF1 domain 2; PF03465: eRF1 domain 3		NOT WBPheno: Bmd; Emb; Gro; Let; Lva; Lvl; Ste; Stp; Variant; embryonic development variant; postembryonic development variant
WBGene00010632|K07C5.9	1.02	0.13	7.85		76 aa	SignalP					NOT WBPheno: Bmd; Emb; Ste; Variant
WBGene00001462|M79.4|flp-19	234.35	29.84	7.85		89 aa	SignalP					NOT WBPheno: Bmd; Emb; Let; Ste; Variant; postembryonic development variant
WBGene00011428|T04C12.3	40.75	5.23	7.79		76 aa	SignalP; Seg					NOT WBPheno: Bmd; Emb; Gro; Let; Lva; Lvl; Ste; Stp; Variant; postembryonic development variant
WBGene00004795|C04F5.1|sid-1	68.14	8.79	7.75		776 aa	SignalP; Tmhmm; Seg		NOG75860: SID1 transmembrane family, member protein; euNOG04720: SID1 transmembrane family, member protein; meNOG05803: SID1 transmembrane family, member protein		WBPhenotype: RNAi resistant; protein rna interaction abolished	NOT WBPheno: Bmd; Emb; Gro; Let; Lva; Lvl; Ste; Stp; Variant; cell division variant; postembryonic development variant; protein aggregation variant; spindle orientation variant; transgene subcellular localization variant
WBGene00001803|C14F11.3|lite-1	5.58	0.72	7.75		439 aa	Tmhmm; Seg			PF08395: 7tm Chemosensory receptor	WBPhenotype: light response variant	NOT WBPheno: Bmd; Emb; Gro; Let; Lva; Lvl; Ste; Stp; Variant; postembryonic development variant; touch resistant
WBGene00010484|K01H12.1|dph-3	14.32	1.85	7.74		43-80 aa	Seg		COG5216: Uncharacterized conserved protein; KOG2923: Uncharacterized conserved protein; meNOG20603: DPH3 homolog protein	PF05207: CSL zinc finger		NOT WBPheno: Let; Variant; postembryonic development variant
WBGene00011420|T04A11.5	2.01	0.26	7.73		316 aa			COG0384: Predicted epimerase, PhzC/PhzF homolog; KOG3033: Predicted PhzC/PhzF-type epimerase; meNOG14288: Phenazine biosynthesis-like domain-containing protein (EC 5.1.-.-)	PF02567: Phenazine biosynthesis-like protein		NOT WBPheno: Bmd; Emb; Gro; Lva; Lvl; Ste; Stp; Variant; postembryonic development variant
WBGene00011417|T04A11.2	2.01	0.26	7.73		316 aa			COG0384: Predicted epimerase, PhzC/PhzF homolog; KOG3033: Predicted PhzC/PhzF-type epimerase; meNOG14288: Phenazine biosynthesis-like domain-containing protein (EC 5.1.-.-)	PF02567: Phenazine biosynthesis-like protein		NOT WBPheno: Let; Variant; postembryonic development variant
WBGene00004344|C05B5.7|rgs-1	9.65	1.25	7.72		201-247 aa	Seg		KOG3589: G protein signaling regulators; meNOG09490: Regulator of g protein signaling	PF00615: Regulator of G protein signaling domain
WBGene00021572|Y45G12C.9|srd-72	0.23	0	7.67		323 aa	SignalP; Tmhmm; Seg			PF10317: Serpentine type 7TM GPCR chemoreceptor Srd; PF10318: Serpentine type 7TM GPCR chemoreceptor Srh; PF10326: Serpentine type 7TM GPCR chemoreceptor Str		NOT WBPheno: Bmd; Emb; Let; Ste; Variant; postembryonic development variant
WBGene00019013|F57C9.7	0.23	0	7.67		412 aa	Seg					NOT WBPheno: Emb; Gro; Let; Lva; Lvl; Ste; Stp; Variant; postembryonic development variant
WBGene00018747|F53C3.3	0.23	0	7.67		239 aa	SignalP; Tmhmm; Seg			PF01705: CX module		NOT WBPheno: Bmd; Emb; Gro; Let; Lva; Lvl; Ste; Stp; Variant; postembryonic development variant
WBGene00013204|Y54E5B.2	0.23	0	7.67		861 aa	Seg		KOG0974: WD-repeat protein WDR6, WD repeat superfamily; meNOG12158: Wd-Repeat protein			NOT WBPheno: Bmd; Emb; Gro; Lva; Lvl; Ste; Stp; Variant; postembryonic development variant
WBGene00011701|T11A5.2|srab-17	0.23	0	7.67		329 aa	SignalP; Tmhmm; Seg			PF02175: Serpentine type 7TM GPCR chemoreceptor Srb		NOT WBPheno: Bmd; Emb; Let; Ste; Variant; postembryonic development variant
WBGene00011107|R07E3.6	0.23	0	7.67		927 aa	SignalP; Seg; Ncoils					NOT WBPheno: Bmd; Emb; Gro; Let; Lva; Lvl; Ste; Stp; Variant; postembryonic development variant
WBGene00007185|B0464.3|nlp-36	17.41	2.27	7.67		82 aa	SignalP; Tmhmm					NOT WBPheno: Bmd; Emb; Gro; Let; Lva; Lvl; Ste; Stp; Variant; postembryonic development variant
WBGene00005148|C13B7.4|srd-71	0.23	0	7.67		323 aa	SignalP; Tmhmm; Seg			PF10317: Serpentine type 7TM GPCR chemoreceptor Srd; PF10318: Serpentine type 7TM GPCR chemoreceptor Srh; PF10326: Serpentine type 7TM GPCR chemoreceptor Str		NOT WBPheno: Emb; Gro; Let; Lva; Lvl; Ste; Stp; Variant; postembryonic development variant
WBGene00003704|Y45G5AM.1|nhr-114	0.23	0	7.67	OMIM:170998 [PEROXISOME PROLIFERATOR-ACTIVATED RECEPTOR-ALPHA; PPARA]	304-418 aa	Seg	Walhout_TF	KOG3575: FOG: Hormone receptors	PF00104: Ligand-binding domain of nuclear hormone receptor; PF00105: Zinc finger, C4 type (two domains)	WBPhenotype: sterile F1	NOT WBPheno: Variant
WBGene00022614|ZC449.4	43.09	5.63	7.65		76 aa	Tmhmm; Seg					NOT WBPheno: Bmd; Emb; Let; Ste; Variant; postembryonic development variant
WBGene00012338|W07G4.4	1894.48	248.16	7.63		522 aa			COG0260: Leucyl aminopeptidase; KOG2597: Predicted aminopeptidase of the M17 family; meNOG05385: Exopeptidase	PF00883: Cytosol aminopeptidase family, catalytic domain	WBPhenotype: protein aggregation variant	NOT WBPheno: Bmd; Emb; Gro; Lva; Lvl; Ste; Stp; Variant; postembryonic development variant
WBGene00020633|T20F7.6|aakg-2	197.08	25.91	7.61	OMIM:194200 [WOLFF-PARKINSON-WHITE SYNDROME]; OMIM:261740 [GLYCOGEN STORAGE DISEASE OF HEART, LETHAL CONGENITAL]; OMIM:600858 [CARDIOMYOPATHY, FAMILIAL HYPERTROPHIC, 6; CMH6]	423 aa	Seg		COG0517: FOG: CBS domain; KOG1764: 5-AMP-activated protein kinase, gamma subunit; meNOG05434: Protein kinase	PF00571: CBS domain		NOT WBPheno: Bmd; Emb; Gro; Lva; Lvl; Ste; Stp; Variant; postembryonic development variant
WBGene00007633|C16D2.1	35.68	4.69	7.61		123-194 aa				PF01466: Skp1 family, dimerisation domain		NOT WBPheno: Bmd; Emb; Gro; Let; Lva; Lvl; Ste; Stp; Variant; postembryonic development variant
WBGene00012216|W02D9.10	16.39	2.17	7.55		182 aa	Seg				WBPhenotype: Let; reduced brood size	NOT WBPheno: Bmd; Emb; Gro; Lva; Lvl; Ste; Stp; Variant; postembryonic development variant
WBGene00013049|Y50E8A.6	1.28	0.17	7.53	OMIM:125853 [DIABETES MELLITUS, NONINSULIN-DEPENDENT; NIDDM]	609 aa	Seg		COG0578: Glycerol-3-phosphate dehydrogenase; KOG0042: Glycerol-3-phosphate dehydrogenase; meNOG05312: Phosphate dehydrogenase	PF00890: FAD binding domain; PF01266: FAD dependent oxidoreductase		NOT WBPheno: Bmd; Emb; Gro; Lva; Lvl; Ste; Stp; Variant; postembryonic development variant
WBGene00007811|C29F7.2	483.57	64.22	7.53		394 aa			euNOG20701: Annotation not available	PF01636: Phosphotransferase enzyme family; PF02958: Domain of unknown function (DUF227)	WBPhenotype: Gro; cadmium hypersensitive	NOT WBPheno: Bmd; Emb; Let; Lva; Lvl; Ste; Stp; Variant; postembryonic development variant
WBGene00003767|B0213.4|nlp-29	6.1	0.81	7.53		73 aa	SignalP; Tmhmm; Seg				WBPhenotype: temperature induced dauer formation variant	NOT WBPheno: Age; Bmd; Emb; Let; Ste; Variant; body morphology variant; fertility variant; pathogen resistance increased; postembryonic development variant
WBGene00000781|C52E4.1|cpr-1	485.09	64.38	7.53		329 aa	SignalP; Seg		KOG1543: Cysteine proteinase Cathepsin L; meNOG06595: Cathepsin b protein	PF00112: Papain family cysteine protease		NOT WBPheno: Bmd; Emb; Let; Ste; Variant; postembryonic development variant
WBGene00007943|C34F6.9	14.22	1.89	7.52		1181 aa	Seg	Thomas+W_TF	KOG1867: Ubiquitin-specific protease	PF00443: Ubiquitin carboxyl-terminal hydrolase		NOT WBPheno: Bmd; Emb; Gro; Let; Lva; Lvl; Ste; Stp; Variant; postembryonic development variant; protein aggregation variant; transgene subcellular localization variant
WBGene00022296|Y76B12C.2|xpc-1	0.75	0.1	7.5	OMIM:278720 [XERODERMA PIGMENTOSUM, COMPLEMENTATION GROUP C; XPC]	1119 aa	Seg		COG5535: DNA repair protein RAD4; KOG2179: Nucleotide excision repair complex XPC-HR23B, subunit XPC/DPB11; meNOG06096: DNA repair protein complementing XP-C cells	PF03835: Rad4 transglutaminase-like domain; PF10403: Rad4 beta-hairpin domain 1; PF10404: Rad4 beta-hairpin domain 2; PF10405: Rad4 beta-hairpin domain 3		NOT WBPheno: Bmd; Emb; Gro; Let; Lva; Lvl; Ste; Stp; Variant; postembryonic development variant
WBGene00022149|Y71G12B.9|lin-65	0.3	0.04	7.5		512-728 aa	Seg; Ncoils				WBPhenotype: Muv; Stp	NOT WBPheno: Adl; Bmd; Emb; Gro; Let; Lva; Lvl; Ste; Variant; ectopic expression transgene; postembryonic development variant
WBGene00019565|K09D9.2|cyp-35A3	0.3	0.04	7.5		494 aa	SignalP; Seg		COG2124: Cytochrome P450; KOG0156: Cytochrome P450 CYP2 subfamily	PF00067: Cytochrome P450		NOT WBPheno: Bmd; Emb; Let; Ste; Variant; postembryonic development variant
WBGene00019498|K07E8.7	8.48	1.13	7.5		432 aa			COG0564: Pseudouridylate synthases, 23S RNA-specific; KOG1919: RNA pseudouridylate synthases; meNOG05897: RNA pseudouridylate synthase domain containing 2	PF00849: RNA pseudouridylate synthase		NOT WBPheno: Bmd; Emb; Gro; Let; Lva; Lvl; Ste; Stp; Variant; postembryonic development variant
WBGene00013359|Y60A3A.8	0.3	0.04	7.5		372 aa	Seg		KOG2788: Glycosyltransferase	PF01827: FTH domain		NOT WBPheno: Bmd; Emb; Let; Ste; Variant; postembryonic development variant
WBGene00007782|C27H2.2	0.3	0.04	7.5		870-906 aa	Seg; Ncoils		NOG137506: Annotation not available; euNOG23265: Annotation not available; meNOG29689: Annotation not available
WBGene00001586|C09G5.1|ggr-1	0.3	0.04	7.5	OMIM:149400 [HYPEREKPLEXIA, HEREDITARY]	473 aa	SignalP; Tmhmm; Seg; Ncoils		KOG3644: Ligand-gated ion channel; meNOG04494: Glycine receptor	PF02931: Neurotransmitter-gated ion-channel ligand binding domain; PF02932: Neurotransmitter-gated ion-channel transmembrane region		NOT WBPheno: Bmd; Emb; Gro; Lva; Lvl; Ste; Stp; Variant; postembryonic development variant
WBGene00022410|Y97E10C.1	28.48	3.81	7.48		55 aa						NOT WBPheno: Bmd; Emb; Ste; Variant
WBGene00010730|K10C3.2	542.47	72.52	7.48		174 aa	Seg		KOG4076: Regulator of ATP-sensitive K+ channels Alpha-endosulfine/ARPP-19 and related cAMP-regulated phosphoproteins	PF04667: cAMP-regulated phosphoprotein/endosulfine conserved region		NOT WBPheno: Bmd; Emb; Gro; Let; Lva; Lvl; Ste; Stp; Variant; postembryonic development variant; protein aggregation variant; transgene subcellular localization variant
WBGene00018724|F53A9.1	36.46	4.9	7.44		77 aa	Seg					NOT WBPheno: Bmd; Egl D; Emb; Gro; Let; Lva; Lvl; Ste; Stp; Variant; anoxia hypersensitive; postembryonic development variant
WBGene00010887|M7.12	17.32	2.33	7.43		241 aa	Seg		euNOG21827: Annotation not available			NOT WBPheno: Bmd; Emb; Gro; Let; Lva; Lvl; Ste; Stp; Variant; postembryonic development variant
WBGene00010806|M01E5.3	36.71	4.94	7.43		556-560 aa	Seg; Ncoils					NOT WBPheno: Bmd; Emb; Gro; Let; Lva; Lvl; Ste; Stp; Variant; postembryonic development variant
WBGene00001494|H09G03.2|frm-8	0.52	0.07	7.43		784-853 aa	Seg; Ncoils		KOG3552: FERM domain protein FRM-8; meNOG07223: PDZ domain containing protein	PF00373: FERM central domain; PF00397: WW domain; PF00595: PDZ domain (Also known as DHR or GLGF); PF00788: Ras association (RalGDS/AF-6) domain; PF09379: FERM N-terminal domain	WBPhenotype: Ric	NOT WBPheno: Bmd; Emb; Gro; Lva; Lvl; Ste; Stp; Variant; embryonic development variant; postembryonic development variant
WBGene00006933|F59G1.3|vps-35	1.91	0.26	7.35	OMIM:614203 [PARKINSON DISEASE 17; PARK17]	821 aa	Seg; Ncoils		KOG1107: Membrane coat complex Retromer, subunit VPS35; meNOG04888: Vacuolar protein sorting-associated protein 35 (Vesicle protein sorting 35)	PF03635: Vacuolar protein sorting-associated protein 35	WBPhenotype: Clr; Egl; Emb; HSN migration variant; Stp; Unc; cell polarity variant; level of transgene expression variant; pattern of transgene expression variant; receptor mediated endocytosis defective; small; transgene subcellular localization variant	NOT WBPheno: Bmd; Let; P granule localization defective; Ste; Variant; germ cell morphology variant; protein aggregation variant; reduced brood size
WBGene00015033|B0207.10	0.22	0	7.33		81 aa	Tmhmm					NOT WBPheno: Bmd; Emb; Gro; Let; Lva; Lvl; Ste; Stp; Variant; postembryonic development variant
WBGene00014240|ZK1251.1|htas-1	23.32	3.18	7.33		145 aa	Seg		COG5262: Histone H2A; KOG1756: Histone 2A; meNOG18762: Histone H2a protein	PF00125: Core histone H2A/H2B/H3/H4; PF00808: Histone-like transcription factor (CBF/NF-Y) and archaeal histone		NOT WBPheno: Age; Bmd; Emb; Let; Ste; Variant
WBGene00014120|ZK858.7	5.13	0.7	7.33		452 aa	Tmhmm		KOG1416: tRNA(1-methyladenosine) methyltransferase, subunit GCD10; meNOG09762: Trna (adenine-N(1)-)-methyltransferase	PF04189: Gcd10p family	WBPhenotype: Dpy; Emb; Gro; Ste; Stp; developmental delay postembryonic; pattern of transgene expression variant; receptor mediated endocytosis defective; transposon silencing variant	NOT WBPheno: Bmd; Let; Lva; Lvl; Variant; postembryonic development variant
WBGene00008520|F02D8.1	0.22	0	7.33		175 aa	Seg					NOT WBPheno: Bmd; Emb; Gro; Let; Lva; Lvl; Ste; Stp; Variant; postembryonic development variant
WBGene00007449|C08F8.9	2.78	0.38	7.32		55 aa	Tmhmm; Seg
WBGene00010906|M88.3	115.96	15.87	7.31		354 aa	Seg; Ncoils					NOT WBPheno: Let; Variant; postembryonic development variant
WBGene00003799|Y37E3.15|npp-13	2.7	0.37	7.3		392-787 aa	Tmhmm; Seg		KOG2168: Cullins; meNOG06768: Nuclear pore protein	PF04097: Nup93/Nic96	WBPhenotype: Emb; Nmo; chromosome condensation variant; nuclear pore variant; protein subcellular localization variant
WBGene00013442|Y66D12A.16	3.04	0.42	7.24		155-158 aa						NOT WBPheno: Bmd; Emb; Ste; Variant
WBGene00012434|Y11D7A.10	203.68	28.2	7.22		70 aa						NOT WBPheno: Bmd; Emb; Gro; Let; Lva; Lvl; Ste; Stp; Variant; postembryonic development variant
WBGene00001616|ZC196.7|glr-5	3.82	0.53	7.21	OMIM:611092 [MENTAL RETARDATION, AUTOSOMAL RECESSIVE 6; MRT6]	932 aa	SignalP; Tmhmm; Seg		KOG1052: Glutamate-gated kainate-type ion channel receptor subunit GluR5 and related subunits; meNOG05718: Glutamate protein	PF00060: Ligand-gated ion channel; PF00497: Bacterial extracellular solute-binding proteins, family 3; PF01094: Receptor family ligand binding region; PF10613: Ligated ion channel L-glutamate- and glycine-binding site		NOT WBPheno: Bmd; Emb; Let; Ste; Variant
WBGene00009454|F36A2.7	5080.82	705.74	7.2		167 aa	Tmhmm				WBPhenotype: Emb; Gro; Lva; Sle; reduced brood size; slow development
WBGene00022114|Y71F9AL.9	883.68	122.93	7.19		314 aa	Seg					NOT WBPheno: Emb; Gro; Lva; Lvl; Ste; Stp; Variant; postembryonic development variant
WBGene00019931|R07C12.1	2.44	0.34	7.18		337 aa	Seg					NOT WBPheno: Bmd; Emb; Let; Ste; Variant; postembryonic development variant
WBGene00019324|K02F2.5	26.17	3.66	7.15		202 aa	SignalP; Seg					NOT WBPheno: Bmd; Emb; Gro; Lva; Lvl; Ste; Stp; Variant; postembryonic development variant
WBGene00010644|K07G5.5	6.89	0.97	7.1		348 aa	Tmhmm; Seg		COG0053: Predicted Co/Zn/Cd cation transporters; KOG1485: Mitochondrial Fe2+ transporter MMT1 and related transporters (cation diffusion facilitator superfamily)			NOT WBPheno: Bmd; Emb; Gro; Lva; Lvl; Ste; Stp; Variant; postembryonic development variant
WBGene00004914|Y116A8C.42|snr-1	397.39	56.32	7.06		136 aa	Seg		COG1958: Small nuclear ribonucleoprotein (snRNP) homolog; KOG3172: Small nuclear ribonucleoprotein Sm D3; meNOG19362: Small nuclear ribonucleoprotein	PF01423: LSM domain	WBPhenotype: Emb; Gro; Lva; Muv; Sck; Ste; cell proliferation increased; cell secretion variant; excess intestinal cells; pattern of transgene expression variant; protein aggregation variant; receptor mediated endocytosis defective; reduced brood size; transgene expression increased; transgene subcellular localization variant
WBGene00001334|Y105E8B.8|ero-1	7.26	1.03	7.05		339-513 aa	SignalP; Seg		COG5061: Oxidoreductin, endoplasmic reticulum membrane-associated protein involved in disulfide bond formation; KOG2608: Endoplasmic reticulum membrane-associated oxidoreductin involved in disulfide bond formation; meNOG05417: Ero1-Like protein	PF04137: Endoplasmic Reticulum Oxidoreductin 1 (ERO1)	WBPhenotype: Age; Let; Lva; Ste; unfolded protein accumulation	NOT WBPheno: Bmd; Emb; Variant
WBGene00044640|B0432.14	2.81	0.4	7.02		100 aa	SignalP; Tmhmm
WBGene00019236|H23N18.5	13.9	1.98	7.02		108 aa	SignalP					NOT WBPheno: Emb; Gro; Lva; Lvl; Ste; Stp; Variant; postembryonic development variant
WBGene00022882|ZK1248.13	0.49	0.07	7		703 aa	Seg					NOT WBPheno: Bmd; Emb; Gro; Let; Lva; Lvl; Ste; Stp; Variant; glp; postembryonic development variant
WBGene00018758|F53E10.1	0.21	0	7		339 aa			COG3217: Uncharacterized Fe-S protein; KOG2362: Uncharacterized Fe-S protein; meNOG11799: Domain-Containing protein	PF03473: MOSC domain; PF03476: MOSC N-terminal beta barrel domain		NOT WBPheno: Bmd; Emb; Ste; Variant
WBGene00016666|C45E5.3	0.21	0	7	OMIM:614122 [CHITOTRIOSIDASE DEFICIENCY; CHITD]	266 aa			COG3325: Chitinase; KOG2806: Chitinase; meNOG04095: Chitinase			NOT WBPheno: Bmd; Emb; Let; Ste; Variant; postembryonic development variant
WBGene00010619|K07A1.15	1.05	0.15	7		122 aa				PF01423: LSM domain
WBGene00003763|Y43F8C.1|nlp-25	0.21	0	7		87 aa	SignalP; Seg					NOT WBPheno: Bmd; Emb; Gro; Let; Lva; Lvl; Ste; Stp; Variant; postembryonic development variant
WBGene00013768|Y113G7B.24	4.53	0.65	6.97		73-224 aa	Ncoils		KOG3176: Predicted alpha-helical protein, potentially involved in replication/repair; meNOG07488: DNA replication protein	PF05916: GINS complex subunit Sld5	WBPhenotype: Emb
WBGene00016655|C44E4.6|acbp-1	279.58	40.19	6.96		86 aa			COG4281: Acyl-CoA-binding protein; KOG0817: Acyl-CoA-binding protein; meNOG21254: Diazepam binding protein		WBPhenotype: fat content reduced; protein aggregation variant; transgene subcellular localization variant	NOT WBPheno: Bmd; Emb; Gro; Let; Lva; Lvl; Ste; Stp; Variant; fat content variant; postembryonic development variant
WBGene00020999|W03F9.1	2.99	0.43	6.95		455 aa	Seg		COG1779: C4-type Zn-finger protein; KOG2703: C4-type Zn-finger protein; meNOG05361: Zinc finger protein	PF03367: ZPR1 zinc-finger domain	WBPhenotype: developmental delay postembryonic; reduced brood size	NOT WBPheno: Emb; Gro; Lva; Lvl; Ste; Stp; Variant; postembryonic development variant
WBGene00012100|T27F2.2	6.66	0.96	6.94		986-995 aa	Seg; Ncoils		KOG3686: Rap1-GTPase-activating protein (Rap1GAP); meNOG05326: Signal-Induced proliferation-associated 1 like protein	PF02145: Rap/ran-GAP		NOT WBPheno: Bmd; Emb; Gro; Lva; Lvl; Ste; Stp; Variant; postembryonic development variant
WBGene00002216|T09A5.2|klp-3	0.9	0.13	6.92		118-598 aa	Ncoils		COG5059: Kinesin-like protein; KOG0239: Kinesin (KAR3 subfamily); meNOG05216: Kinesin-Like protein	PF00225: Kinesin motor domain	WBPhenotype: Emb; Him; chromosome segregation variant; dead eggs laid; embryonic arrest; mitosis variant; reduced brood size	NOT WBPheno: Bmd; Gro; Let; Lva; Lvl; Ste; Stp; Variant; germ cell morphology variant; meiotic spindle positioning defective; postembryonic development variant
WBGene00002079|Y48G1A.5|xpo-2	4.56	0.66	6.91		938 aa	Seg		COG5657: CAS/CSE protein involved in chromosome segregation; KOG1992: Nuclear export receptor CSE1/CAS (importin beta superfamily); meNOG05569: Exportin-2 (Exp2) (Importin-alpha re-exporter) protein	PF03378: CAS/CSE protein, C-terminus; PF03810: Importin-beta N-terminal domain; PF08506: Cse1	WBPhenotype: Emb; Gro; Let; Lva; Pna; Pvl; RNAi resistant; Sck; Ste; Unc; distal tip cell migration variant; pattern of transgene expression variant; protein aggregation variant; receptor mediated endocytosis defective; reduced brood size; somatic transgene silencing variant; transgene expression increased; transgene subcellular localization variant
WBGene00006519|F54D8.2|tag-174	786.29	113.99	6.9		128 aa	Tmhmm		KOG3469: Cytochrome c oxidase, subunit VIa/COX13; meNOG20702: Cytochrome c oxidase		WBPhenotype: Age; Gro; L1 arrest; Ste; paraquat resistant	NOT WBPheno: Bmd; Emb; Let; Lva; Lvl; Stp; Variant; embryonic development variant; nicotine response variant; postembryonic development variant; protein aggregation variant; transgene subcellular localization variant
WBGene00016870|C52B9.11	0.62	0.09	6.89		148 aa
WBGene00020626|T20F5.4	6.19	0.9	6.88		333 aa	Seg					NOT WBPheno: Bmd; Emb; Gro; Let; Lva; Lvl; Ste; Stp; Variant; postembryonic development variant
WBGene00019732|M02D8.6	64.7	9.4	6.88		117 aa	SignalP
WBGene00010655|K08D8.1	1.03	0.15	6.87		86 aa	Tmhmm; Seg					NOT WBPheno: Bmd; Emb; Gro; Lva; Lvl; Ste; Stp; Variant; postembryonic development variant
WBGene00022402|Y97E10AR.7	1154.25	168.44	6.85	OMIM:610798 [IMMUNODEFICIENCY DUE TO DEFECT IN MAPBP-INTERACTING PROTEIN]	124 aa			KOG4107: MP1 adaptor interacting protein P14; meNOG19443: Interacting protein	PF03259: Roadblock/LC7 domain	WBPhenotype: Let; Ste	NOT WBPheno: Bmd; Emb; Variant; postembryonic development variant
WBGene00000941|Y39A3CR.4|ddp-1	12.81	1.87	6.85	OMIM:304700 [MOHR-TRANEBJAERG SYNDROME; MTS]; OMIM:311150 [OPTICOACOUSTIC NERVE ATROPHY WITH DEMENTIA]	83 aa			KOG3489: Mitochondrial import inner membrane translocase, subunit TIM8; meNOG20664: Mitochondrial protein	PF02953: Tim10/DDP family zinc finger	WBPhenotype: connected mitochondria	NOT WBPheno: Bmd; Emb; Let; Ste; Variant; postembryonic development variant
WBGene00016193|C28H8.2	2.53	0.37	6.84		162 aa	SignalP					NOT WBPheno: Bmd; Emb; Gro; Let; Lva; Lvl; Ste; Stp; Variant; embryonic development variant; postembryonic development variant
WBGene00004495|F39B2.6|rps-26	2959.73	434.75	6.81	OMIM:613309 [DIAMOND-BLACKFAN ANEMIA 10; DBA10]	117 aa	Seg		COG4830: Ribosomal protein S26; KOG1768: 40s ribosomal protein S26; meNOG20204: Ribosomal protein S26		WBPhenotype: Age; Dpy; Emb; Etv; Lva; Lvl; Ste; Unc; Var; pathogen resistance increased; protein aggregation variant; slow development; transgene subcellular localization variant
WBGene00010647|K08C7.4	0.34	0.05	6.8		194 aa	Seg					NOT WBPheno: Bmd; Emb; Gro; Let; Lva; Lvl; Ste; Stp; Variant; postembryonic development variant
WBGene00022507|ZC21.8	2.31	0.34	6.79		145 aa	SignalP; Tmhmm; Seg					NOT WBPheno: Bmd; Emb; Let; Ste; Variant; embryonic development variant; postembryonic development variant
WBGene00021219|Y19D10A.4	1.22	0.18	6.78	OMIM:269920 [INFANTILE SIALIC ACID STORAGE DISORDER]; OMIM:604369 [SIALURIA, FINNISH TYPE]	475 aa	Tmhmm; Seg		COG0477: Permeases of the major facilitator superfamily; KOG2532: Permease of the major facilitator superfamily; meNOG04290: Transporter protein	PF07690: Major Facilitator Superfamily		NOT WBPheno: Let; Variant; postembryonic development variant
WBGene00015271|C01B4.7	1.22	0.18	6.78	OMIM:269920 [INFANTILE SIALIC ACID STORAGE DISORDER]; OMIM:604369 [SIALURIA, FINNISH TYPE]	475 aa	Tmhmm; Seg		COG0477: Permeases of the major facilitator superfamily; KOG2532: Permease of the major facilitator superfamily; meNOG04290: Transporter protein	PF07690: Major Facilitator Superfamily		NOT WBPheno: Bmd; Emb; Gro; Lva; Lvl; Ste; Stp; Variant; postembryonic development variant
WBGene00044073|C34H4.3|tag-244	11.17	1.65	6.77		399 aa	SignalP; Seg			PF03409: Transmembrane glycoprotein		NOT WBPheno: Bmd; Emb; Gro; Lva; Lvl; Ste; Stp; Variant; postembryonic development variant
WBGene00015001|B0025.4	1.15	0.17	6.76		148 aa	Seg			PF09340: Histone acetyltransferase subunit NuA4
WBGene00043537|W03G1.3	0.27	0.04	6.75		414 aa	Seg					NOT WBPheno: Bmd; Emb; Gro; Lva; Lvl; Ste; Stp; Variant; postembryonic development variant
WBGene00001853|Y73B6BL.9|hil-2	3.78	0.56	6.75		173-241 aa	Seg		KOG4012: Histone H1; meNOG22612: Histones H1 are necessary for the condensation of nucleosome chains into higher order protein	PF00538: linker histone H1 and H5 family		NOT WBPheno: Bmd; Emb; Let; Ste; Variant; germline transgene silencing variant; postembryonic development variant; somatic transgene silencing variant
WBGene00001480|H24K24.5|fmo-5	2.7	0.4	6.75		518 aa	Seg		COG2072: Predicted flavoprotein involved in K+ transport; KOG1399: Flavin-containing monooxygenase; meNOG12877: Monooxygenase	PF00743: Flavin-binding monooxygenase-like; PF07992: Pyridine nucleotide-disulphide oxidoreductase		NOT WBPheno: Bmd; Emb; Gro; Let; Lva; Lvl; Ste; Stp; Variant; postembryonic development variant
WBGene00021676|Y48G1C.1	9.32	1.39	6.71		454 aa	Seg				WBPhenotype: transgene expression reduced	NOT WBPheno: Bmd; Emb; Gro; Let; Lva; Lvl; Ste; Stp; Variant; glp; necrotic cell death variant; postembryonic development variant
WBGene00001911|C50F4.7|his-37	51.48	7.68	6.7		103 aa	Seg		COG2036: Histones H3 and H4; KOG3467: Histone H4; meNOG20073: Histone H4 protein	PF00125: Core histone H2A/H2B/H3/H4; PF00808: Histone-like transcription factor (CBF/NF-Y) and archaeal histone; PF02969: TATA box binding protein associated factor (TAF)	WBPhenotype: Emb; Lva; Ste; body wall muscle myosin organization defective; reduced brood size; thin	NOT WBPheno: Bmd; Let; Variant; postembryonic development variant
WBGene00016717|C46F9.1|math-22	0.2	0	6.67		135 aa				PF00917: MATH domain		NOT WBPheno: Let; Variant; postembryonic development variant
WBGene00015164|B0361.10|ykt-6	0.2	0	6.67		201 aa			COG5143: Synaptobrevin/VAMP-like protein; KOG0861: SNARE protein YKT6, synaptobrevin/VAMP syperfamily; meNOG09463: Vesicular soluble NSF attachment protein receptor (v- SNARE) mediating vesicle docking and fusion to a specific acceptor cellular compartment. Functions in endoplasmic reticulum to Golgi transport; as part of a SNARE complex composed of GOSR1, GOSR2 and STX5. Functions in early/recyc…	PF00957: Synaptobrevin	WBPhenotype: Clr; Emb; Gro; Let; Lva; Sck; Ste; Stp; Unc; early larval arrest; pattern of transgene expression variant; receptor mediated endocytosis defective; reduced brood size; transgene subcellular localization variant
WBGene00013980|ZK507.4|dos-1	0.2	0	6.67		206 aa	SignalP; Seg					NOT WBPheno: Emb; Gro; Lva; Lvl; Ste; Stp; Variant; postembryonic development variant
WBGene00013218|Y54G11A.9	0.2	0	6.67		134 aa			COG0316: Uncharacterized conserved protein; KOG1119: Mitochondrial Fe-S cluster biosynthesis protein ISA2 (contains a HesB-like domain); meNOG19775: Iron-Sulfur cluster assembly 2 homolog, mitochondrial protein	PF01521: Iron-sulphur cluster biosynthesis		NOT WBPheno: Bmd; Emb; Let; Ste; Variant; postembryonic development variant
WBGene00009848|F48F5.6	0.8	0.12	6.67		63-103 aa	SignalP; Tmhmm; Seg
WBGene00004974|F25H8.7|spe-29	0.2	0	6.67		66 aa	Tmhmm; Seg					NOT WBPheno: Bmd; Emb; Ste; Variant
WBGene00001992|Y48B6A.9|hot-7	0.2	0	6.67		182 aa	SignalP					NOT WBPheno: Bmd; Emb; Gro; Lva; Lvl; Ste; Stp; Variant; postembryonic development variant
WBGene00003769|B0213.6|nlp-31	6.59	0.99	6.66		75 aa	SignalP; Tmhmm; Seg					NOT WBPheno: Bmd; Emb; Gro; Let; Lva; Lvl; Ste; Stp; Variant; postembryonic development variant
WBGene00007107|B0035.4|pfd-4	8.36	1.26	6.63		126 aa	Seg; Ncoils		KOG1760: Molecular chaperone Prefoldin, subunit 4; meNOG19581: Prefoldin protein	PF01920: Prefoldin subunit	WBPhenotype: Muv	NOT WBPheno: Bmd; Emb; Gro; Let; Lva; Lvl; Ste; Stp; Variant; postembryonic development variant
WBGene00015354|C02F12.3	60.87	9.2	6.62		101 aa	SignalP; Seg					NOT WBPheno: Bmd; Emb; Gro; Lva; Lvl; Ste; Stp; Variant; postembryonic development variant
WBGene00009277|F30F8.10	19.57	2.96	6.61		215-242 aa			KOG3138: Predicted N-acetyltransferase; meNOG10973: Fis, clone protein	PF00583: Acetyltransferase (GNAT) family; PF08445: FR47-like protein
WBGene00011680|T10B10.3	52.76	7.99	6.6		741 aa						NOT WBPheno: Bmd; Emb; Gro; Let; Lva; Lvl; Ste; Stp; Variant; postembryonic development variant
WBGene00010200|F57C7.4	2.84	0.43	6.6		1520 aa	SignalP; Tmhmm; Seg					NOT WBPheno: Bmd; Emb; Gro; Let; Lva; Lvl; Ste; Stp; Variant; postembryonic development variant
WBGene00005416|Y102A5C.15|srh-206	0.33	0.05	6.6		338 aa	Tmhmm; Seg			PF10317: Serpentine type 7TM GPCR chemoreceptor Srd; PF10318: Serpentine type 7TM GPCR chemoreceptor Srh; PF10319: Serpentine type 7TM GPCR chemoreceptor Srj; PF10326: Serpentine type 7TM GPCR chemoreceptor Str; PF10327: Serpentine type 7TM GPCR chemoreceptor Sri		NOT WBPheno: Bmd; Emb; Ste; Variant
WBGene00000565|Y17G7B.15|cnt-1	100.54	15.23	6.6		742-826 aa	Seg; Ncoils		COG5347: GTPase-activating protein that regulates ARFs (ADP-ribosylation factors), involved in ARF-mediated vesicular transport; KOG0521: Putative GTPase activating proteins (GAPs); meNOG05449: Centaurin, beta protein	PF00023: Ankyrin repeat; PF00169: PH domain; PF01412: Putative GTPase activating protein for Arf	WBPhenotype: Lvl; fat content reduced	NOT WBPheno: Bmd; Emb; Gro; Let; Lva; Ste; Stp; Variant; fat content variant; gut granule development variant; postembryonic development variant; protein subcellular localization variant
WBGene00009288|F31C3.6	5.24	0.8	6.55		554 aa	SignalP; Tmhmm; Seg		NOG40767: Annotation not available; euNOG13655: Annotation not available; meNOG22299: Annotation not available			NOT WBPheno: Bmd; Emb; Gro; Let; Lva; Lvl; Ste; Stp; Variant; postembryonic development variant
WBGene00015750|C14A11.5	0.26	0.04	6.5		450 aa	Seg; Ncoils					NOT WBPheno: Bmd; Emb; Gro; Let; Lva; Lvl; Ste; Stp; Variant; postembryonic development variant
WBGene00011990|T24D5.2	0.26	0.04	6.5		408 aa	Seg					NOT WBPheno: Bmd; Emb; Gro; Let; Lva; Lvl; Ste; Stp; Variant; postembryonic development variant
WBGene00002184|C47D12.7|kel-1	0.26	0.04	6.5		113-618 aa	Seg		KOG4441: Proteins containing BTB/POZ and Kelch domains, involved in regulatory/signal transduction processes; meNOG04332: Kelch-Like protein	PF00651: BTB/POZ domain; PF01344: Kelch motif; PF07707: BTB And C-terminal Kelch	WBPhenotype: fat content reduced	NOT WBPheno: Bmd; Emb; Gro; Let; Lva; Lvl; Ste; Stp; Variant; fat content variant; postembryonic development variant
WBGene00009284|F31C3.2	35.02	5.4	6.49		805-808 aa	Seg		COG5260: DNA polymerase sigma; KOG2277: S-M checkpoint control protein CID1 and related nucleotidyltransferases; meNOG13151: Cytoplasmic poly RNA polymerase that adds successive AMP monomers to the 3'-end of specific RNAs, forming a poly tail. In contrast to the canonical nuclear poly RNA polymerase, it only adds poly to selected cytoplasmic mRNAs	PF03828: Poly(A) polymerase	WBPhenotype: Him	NOT WBPheno: Bmd; Emb; Let; Ste; Variant; postembryonic development variant
WBGene00010467|K01D12.8	1.88	0.29	6.48		139 aa	SignalP; Tmhmm; Seg					NOT WBPheno: Bmd; Emb; Gro; Lva; Lvl; Ste; Stp; Variant; postembryonic development variant
WBGene00003860|Y38F1A.9|oig-2	189.49	29.22	6.48	OMIM:600334 [TIBIAL MUSCULAR DYSTROPHY, TARDIVE]; OMIM:603075 [MACULAR DEGENERATION, AGE-RELATED, 1; ARMD1]; OMIM:603689 [HEREDITARY MYOPATHY WITH EARLY RESPIRATORY FAILURE; HMERF]; OMIM:604145 [CARDIOMYOPATHY, DILATED, 1G; CMD1G]; OMIM:608807 [MUSCULAR DYSTROPHY, LIMB-GIRDLE, TYPE 2J; LGMD2J]; OMIM:611705 [MYOPATHY, EARLY-ONSET, WITH FATAL CARDIOMYOPATHY]; OMIM:613765 [CARDIOMYOPATHY, FAMILIAL H…	108 aa				PF00047: Immunoglobulin domain; PF07679: Immunoglobulin I-set domain; PF07686: Immunoglobulin V-set domain	WBPhenotype: fat content increased	NOT WBPheno: Bmd; Emb; Gro; Let; Lva; Lvl; Ste; Stp; Variant; postembryonic development variant
WBGene00017500|F15E11.14	7.63	1.18	6.47		154 aa			NOG116172: Annotation not available
WBGene00000882|F42G9.2|cyn-6	304.72	47.13	6.47	OMIM:259440 [OSTEOGENESIS IMPERFECTA, TYPE IX]	201 aa	SignalP; Seg		COG0652: Peptidyl-prolyl cis-trans isomerase (rotamase) - cyclophilin family; KOG0880: Peptidyl-prolyl cis-trans isomerase; meNOG10184: Cis-Trans protein	PF00160: Cyclophilin type peptidyl-prolyl cis-trans isomerase/CLD		NOT WBPheno: Emb; Gro; Let; Lva; Lvl; Ste; Stp; Variant; postembryonic development variant; protein aggregation variant; transgene subcellular localization variant
WBGene00003389|K03H1.2|mog-1	7.3	1.13	6.46		1131 aa	Seg; Ncoils		COG1643: HrpA-like helicases; KOG0924: mRNA splicing factor ATP-dependent RNA helicase; meNOG04942: Pre-Mrna-Splicing factor ATP-dependent RNA helicase PRP16 EC 3.6.1	PF00270: DEAD/DEAH box helicase; PF00271: Helicase conserved C-terminal domain; PF04408: Helicase associated domain (HA2); PF07717: Domain of unknown function (DUF1605)	WBPhenotype: Bmd; Dpy; Emb; Lvl; Mog; cell proliferation increased; excess intestinal cells; hermaphrodite self sterile; pattern of transgene expression variant; receptor mediated endocytosis defective; sperm excess
WBGene00003836|Y71F9AM.5|nxt-1	539.14	83.76	6.44		131-137 aa			KOG4353: RNA export factor NXT1; meNOG18736: Ntf2-Related export protein	PF02136: Nuclear transport factor 2 (NTF2) domain; PF10429: Nuclear pore RNA shuttling protein Mtr2	WBPhenotype: Emb; Lva; Lvl; Pvl; Ste; Unc; mRNA export variant; pattern of transgene expression variant; receptor mediated endocytosis defective	NOT WBPheno: Bmd; Variant
WBGene00007070|AC3.2|ugt-49	0.45	0.07	6.43	OMIM:143500 [GILBERT SYNDROME]; OMIM:218800 [CRIGLER-NAJJAR SYNDROME]; OMIM:237900 [HYPERBILIRUBINEMIA, TRANSIENT FAMILIAL NEONATAL]; OMIM:601816 [BILIRUBIN, SERUM LEVEL OF, QUANTITATIVE TRAIT LOCUS 1; BILIQTL1]; OMIM:606785 [CRIGLER-NAJJAR SYNDROME, TYPE II]; OMIM:612560 [BONE MINERAL DENSITY QUANTITATIVE TRAIT LOCUS 12; BMND12]	525 aa	SignalP; Tmhmm; Seg		COG1819: Glycosyl transferases, related to UDP-glucuronosyltransferase; KOG1192: UDP-glucuronosyl and UDP-glucosyl transferase; meNOG13111: Udp-Glucuronosyltransferase
WBGene00019805|R01B10.3	3.21	0.5	6.42		98 aa	Tmhmm; Seg		KOG0471: Alpha-amylase			NOT WBPheno: Bmd; Emb; Let; Ste; Variant; postembryonic development variant
WBGene00015294|C01C10.2	5.97	0.93	6.42		204-283 aa						NOT WBPheno: Bmd; Emb; Gro; Let; Lva; Lvl; Ste; Stp; Variant; postembryonic development variant
WBGene00021465|Y39G10AR.7	21.67	3.38	6.41		474 aa	Seg; Ncoils				WBPhenotype: Dpy; Emb; Lva; Ste; Unc; small	NOT WBPheno: Bmd; Gro; Lvl; Stp; Variant; postembryonic development variant
WBGene00019896|R05G6.1	20.97	3.27	6.41		314 aa	Seg; Ncoils					NOT WBPheno: Bmd; Emb; Let; Ste; Variant; postembryonic development variant
WBGene00044766	0.32	0.05	6.4
WBGene00001448|C03G5.7|flp-5	258.56	40.43	6.4		116 aa	SignalP			PF01581: FMRFamide related peptide family		NOT WBPheno: Bmd; Emb; Gro; Let; Lva; Lvl; Ste; Stp; Variant; postembryonic development variant
WBGene00020917|W01B11.6	480.56	75.52	6.36		109 aa			KOG0907: Thioredoxin	PF00085: Thioredoxin		NOT WBPheno: Bmd; Emb; Ste; Variant
WBGene00014258|ZK1320.9	63.09	9.93	6.35		472 aa	Seg		COG0427: Acetyl-CoA hydrolase; KOG2828: Acetyl-CoA hydrolase; meNOG04310: Protein involved in acetyl-CoA metabolic process	PF02550: Acetyl-CoA hydrolase/transferase N-terminal domain		NOT WBPheno: Bmd; Emb; Gro; Let; Lva; Lvl; Ste; Stp; Variant; postembryonic development variant
WBGene00007362|C06B3.3|cyp-35C1	3.74	0.59	6.34		495 aa	SignalP; Seg		COG2124: Cytochrome P450; KOG0156: Cytochrome P450 CYP2 subfamily	PF00067: Cytochrome P450	WBPhenotype: organism oxidative stress resistant	NOT WBPheno: Age; Bmd; Emb; Gro; Let; Lva; Lvl; Ste; Stp; Variant; fertility variant; morphology variant; postembryonic development variant
WBGene00045517|R11D1.13	0.19	0	6.33		95 aa	SignalP; Ncoils
WBGene00045435|Y34B4A.11	5.95	0.94	6.33		56 aa
WBGene00022031|Y65B4A.8	0.19	0	6.33		461 aa	Seg		COG0237: Dephospho-CoA kinase; COG1019: Predicted nucleotidyltransferase; KOG3220: Similar to bacterial dephospho-CoA kinase; KOG3351: Predicted nucleotidyltransferase; meNOG06090: Coenzyme A synthase	PF01121: Dephospho-CoA kinase; PF01467: Cytidylyltransferase		NOT WBPheno: Bmd; Emb; Ste; Variant
WBGene00021682|Y48G1C.9	0.19	0	6.33		103 aa				PF01423: LSM domain		NOT WBPheno: Bmd; Emb; Ste; Variant
WBGene00012663|Y39A1C.4|hex-3	0.19	0	6.33		591 aa	SignalP; Tmhmm; Seg		NOG72156: Hydrolase family 20; euNOG04741: Hexosaminidase; meNOG06149: Hexosaminidase	PF00728: Glycosyl hydrolase family 20, catalytic domain		NOT WBPheno: Ced; Let; Variant; embryonic development variant; postembryonic development variant
WBGene00010864|M04D8.6|xbx-3	0.19	0	6.33		200 aa	Tmhmm; Seg					NOT WBPheno: Bmd; Emb; Gro; Let; Lva; Lvl; Ste; Stp; Variant; embryonic development variant; postembryonic development variant
WBGene00003619|F43C1.4|nhr-20	0.19	0	6.33		457 aa		Walhout_TF	KOG3575: FOG: Hormone receptors	PF00104: Ligand-binding domain of nuclear hormone receptor; PF00105: Zinc finger, C4 type (two domains)		NOT WBPheno: Bmd; Emb; Let; Ste; Variant; embryonic development variant; postembryonic development variant
WBGene00001629|Y116F11B.12|gly-4	0.19	0	6.33		453-589 aa	SignalP; Tmhmm; Seg		KOG3738: Predicted polypeptide N-acetylgalactosaminyltransferase; meNOG05445: Polypeptide N-acetylgalactosaminyltransferase 2 (EC 2.4.1.41)	PF00535: Glycosyl transferase family 2; PF00652: Ricin-type beta-trefoil lectin domain		NOT WBPheno: Bmd; Emb; Let; Ste; Variant; postembryonic development variant
WBGene00018729|F53A9.6	11.12	1.77	6.28		86 aa	Seg					NOT WBPheno: Bmd; Emb; Gro; Let; Lva; Lvl; Ste; Stp; Variant; postembryonic development variant
WBGene00006393|F48D6.1|taf-11.1	20.23	3.23	6.26		345 aa	Seg; Ncoils		COG5251: Transcription initiation factor TFIID, subunit TAF11; KOG3219: Transcription initiation factor TFIID, subunit TAF11; meNOG17098: Transcription initiation factor TFIID subunit 11 (Transcription initiation factor TFIID 28 kDa subunit)	PF04719: hTAFII28-like protein conserved region		NOT WBPheno: Bmd; Emb; Gro; Let; Lva; Lvl; Ste; Stp; Variant; postembryonic development variant
WBGene00001345|F29G9.4|fos-1	84.49	13.57	6.23		331-467 aa	Seg; Ncoils	Thomas+W_TF	KOG1414: Transcriptional activator FOSB/c-Fos and related bZIP transcription factors	PF00170: bZIP transcription factor; PF07716: Basic region leucine zipper	WBPhenotype: Pvl; Rup; Ste; Stp; connection of gonad variant; pattern of transgene expression variant; protein secretion variant; receptor mediated endocytosis defective; transgene expression reduced; transgene expression undetectable; vulva morphology variant	NOT WBPheno: cell polarity variant; multiple anchor cells; transgene subcellular localization variant; vulva cell fate specification variant
WBGene00012615|Y38H6C.1|dct-16	204.61	32.88	6.22		79-90 aa	Seg					NOT WBPheno: Bmd; Emb; Gro; Let; Lva; Lvl; Ste; Stp; Variant; postembryonic development variant
WBGene00011979|T24B8.5	36.64	5.89	6.22		99 aa	SignalP			PF01549: ShK domain-like		NOT WBPheno: Bmd; Emb; Gro; Let; Lva; Lvl; Ste; Stp; Variant; postembryonic development variant
WBGene00011464|T05B9.1	637.13	102.42	6.22		262 aa	Seg; Ncoils					NOT WBPheno: Bmd; Emb; Gro; Let; Lva; Lvl; Ste; Stp; Variant; postembryonic development variant
WBGene00019180|H10D18.5	0.62	0.1	6.2		332 aa	Seg					NOT WBPheno: Bmd; Emb; Let; Ste; Variant; postembryonic development variant
WBGene00018128|F36H12.15	2.6	0.42	6.19		78 aa	Tmhmm; Seg
WBGene00010420|H28O16.2	1.05	0.17	6.18		478 aa	Seg; Ncoils		KOG2293: Daxx-interacting protein MSP58/p78, contains FHA domain; meNOG07073: Microspherule protein 1	PF00498: FHA domain		NOT WBPheno: Bmd; Emb; Gro; Let; Lva; Lvl; Ste; Stp; Variant; organism UV hypersensitive; postembryonic development variant
WBGene00022843|ZK1055.2	0.37	0.06	6.17		298 aa				PF03314: Protein of unknown function, DUF273		NOT WBPheno: Bmd; Emb; Gro; Let; Lva; Lvl; Ste; Stp; Variant; postembryonic development variant
WBGene00020820|T26A5.4	930.51	151.02	6.16	OMIM:608540 [CONGENITAL DISORDER OF GLYCOSYLATION, TYPE Ik; CDG1K]	491 aa	Tmhmm		COG0438: Glycosyltransferase; KOG2941: Beta-1,4-mannosyltransferase; meNOG05313: Mannosyltransferase; beta-1,4 mannosyltransferase	PF00534: Glycosyl transferases group 1	WBPhenotype: Emb; Ste	NOT WBPheno: Bmd; Gro; Let; Lva; Lvl; Stp; Variant; embryonic development variant; postembryonic development variant; protein aggregation variant; transgene subcellular localization variant
WBGene00018909|F56A3.2|slx-1	104.84	17.02	6.16		443 aa	Seg		KOG3005: GIY-YIG type nuclease; meNOG12759: GIY-YIG domain-containing protein	PF01541: GIY-YIG catalytic domain	WBPhenotype: Emb; Lva	NOT WBPheno: Bmd; Let; Ste; Variant; postembryonic development variant
WBGene00001841|C36B7.7|hen-1	1.54	0.25	6.16		117 aa	SignalP				WBPhenotype: dauer defective
WBGene00017982|F32D1.2	11.81	1.92	6.15		54 aa			KOG3495: Mitochondrial F1F0-ATP synthase, subunit epsilon/ATP15	PF04627: Mitochondrial ATP synthase epsilon chain	WBPhenotype: Emb; Gro; Let; Lva; Lvl; Sck; Ste; Stp; Unc; distal tip cell migration variant; growth rate variant; reduced brood size	NOT WBPheno: Variant; postembryonic development variant
WBGene00002249|ZK353.6|lap-1	355.96	57.95	6.14		491 aa			COG0260: Leucyl aminopeptidase; KOG2597: Predicted aminopeptidase of the M17 family; meNOG05767: Syntaxin-16 protein	PF00883: Cytosol aminopeptidase family, catalytic domain	WBPhenotype: Daf c	NOT WBPheno: Bmd; Emb; Gro; Let; Lva; Lvl; Ste; Stp; Variant; embryonic development variant; postembryonic development variant
WBGene00022170|Y71H2AM.5	330.2	54	6.11	OMIM:220110 [MITOCHONDRIAL COMPLEX IV DEFICIENCY]	121 aa			KOG3057: Cytochrome c oxidase, subunit VIb/COX12; meNOG21807: Protein involved in oxidative phosphorylation	PF02297: Cytochrome oxidase c subunit VIb	WBPhenotype: Emb	NOT WBPheno: Bmd; Ste; Variant
WBGene00001971|Y48B6A.14|hmg-1.1	21532	3521.89	6.11		95 aa		Thomas+W_TF	COG5648: Chromatin-associated proteins containing the HMG domain; KOG0381: HMG box-containing protein; meNOG06750: Component of the FACT complex, a general chromatin factor that acts to reorganize nucleosomes. The FACT complex is involved in multiple processes that require DNA as a template such as mRNA elongation, DNA replication and DNA repair. During transcription elongation the FACT complex a…	PF00505: HMG (high mobility group) box		NOT WBPheno: Bmd; Emb; Let; Ste; Variant; postembryonic development variant
WBGene00010565|K04G2.6	7.86	1.29	6.09		694 aa			KOG0212: Uncharacterized conserved protein; meNOG04950: Vac14 homolog protein	PF11916: Domain of unknown function (DUF3434)		NOT WBPheno: Bmd; Emb; Gro; Lva; Lvl; Ste; Stp; Variant; postembryonic development variant
WBGene00002258|W02D3.5|lbp-6	3.47	0.57	6.09		135 aa	Seg		KOG4015: Fatty acid-binding protein FABP; meNOG18832: Fatty acid binding protein		WBPhenotype: Age; Daf c; organism oxidative stress resistant	NOT WBPheno: Bmd; Emb; Gro; Let; Lva; Lvl; Ste; Stp; Variant; postembryonic development variant
WBGene00000039|C42D8.5|acn-1	2.62	0.43	6.09	OMIM:104300 [ALZHEIMER DISEASE; AD]; OMIM:106180 [ANGIOTENSIN I-CONVERTING ENZYME; ACE]; OMIM:267430 [RENAL TUBULAR DYSGENESIS; RTD]; OMIM:601367 [STROKE, ISCHEMIC]; OMIM:603933 [MICROVASCULAR COMPLICATIONS OF DIABETES, SUSCEPTIBILITY TO, 1; MVCD1]; OMIM:612624 [MICROVASCULAR COMPLICATIONS OF DIABETES, SUSCEPTIBILITY TO, 3; MVCD3]	332-906 aa	SignalP; Seg		KOG3690: Angiotensin I-converting enzymes - M2 family peptidases; meNOG07044: Angiotensin protein	PF01401: Angiotensin-converting enzyme; PF01683: EB module	WBPhenotype: Emb; Gro; L1 arrest; L2 arrest; Let; Lva; Lvl; Mlt; Prl; Ste; Unc; protein aggregation variant; transgene subcellular localization variant	NOT WBPheno: Bmd; Variant; nicotine response variant
WBGene00016014|C23G10.7	396.56	65.26	6.08		408-572 aa			KOG3790: Uncharacterized conserved protein; meNOG06929: Annotation not available	PF07021: Methionine biosynthesis protein MetW; PF07757: Predicted AdoMet-dependent methyltransferase		NOT WBPheno: Bmd; Emb; Gro; Let; Lva; Lvl; Ste; Stp; Variant; embryonic development variant; postembryonic development variant
WBGene00014007|ZK596.2	17.03	2.8	6.08	OMIM:604432 [SPINOCEREBELLAR ATAXIA 11; SCA11]	305 aa			COG0515: Serine/threonine protein kinase; KOG1164: Casein kinase (serine/threonine/tyrosine protein kinase); meNOG05143: Tau tubulin kinase	PF00069: Protein kinase domain; PF07714: Protein tyrosine kinase		NOT WBPheno: Bmd; Emb; Let; Ste; Variant; postembryonic development variant
WBGene00016379|C33H5.13	7.95	1.31	6.07		92 aa	Seg					NOT WBPheno: Bmd; Emb; Gro; Let; Lva; Lvl; Ste; Stp; Variant; postembryonic development variant
WBGene00006044|T27A3.3|ssp-16	16.03	2.64	6.07		109 aa	Seg			PF00635: MSP (Major sperm protein) domain		NOT WBPheno: Variant
WBGene00016865|C52B9.2	5.39	0.89	6.06		174-396 aa		Thomas+W_TF	KOG3806: Predicted transcription factor	PF00178: Ets-domain		NOT WBPheno: Bmd; Emb; Gro; Let; Lva; Lvl; Ste; Stp; Variant; gene expression variant; postembryonic development variant; ventral cord patterning variant
WBGene00001940|H02I12.6|his-66	2.42	0.4	6.05		123 aa	Seg		KOG1744: Histone H2B; meNOG20185: Histone H2B protein	PF00125: Core histone H2A/H2B/H3/H4; PF00808: Histone-like transcription factor (CBF/NF-Y) and archaeal histone
WBGene00004719|F15A2.6|sad-1	4.23	0.7	6.04		835-914 aa	Seg; Ncoils		COG0515: Serine/threonine protein kinase; KOG0588: Serine/threonine protein kinase; meNOG04517: Br serine/threonine protein	PF00069: Protein kinase domain; PF07714: Protein tyrosine kinase	WBPhenotype: Ric; Unc; cell polarity variant; protein subcellular localization variant; synapse morphology variant	NOT WBPheno: Bmd; Emb; Gro; Let; Lva; Lvl; Ste; Stp; Variant; postembryonic development variant
WBGene00044204|T07C12.14	5.55	0.92	6.03		215 aa	Seg
WBGene00020715|T23B7.1|nspd-4	25.39	4.21	6.03		71 aa	Seg					NOT WBPheno: Let; Variant; postembryonic development variant
WBGene00009157|F26E4.2	2.17	0.36	6.03		137 aa	Tmhmm; Seg					NOT WBPheno: Bmd; Emb; Gro; Let; Lva; Lvl; Ste; Stp; Variant; postembryonic development variant
WBGene00019680|K12H4.5	154.05	25.58	6.02		97 aa	Tmhmm				WBPhenotype: Age; Emb; Gro; Let; Lva; Lvl; Pvl; RNAi resistant; Sck; Ste; growth rate variant; paraquat resistant; pattern of transgene expression variant; receptor mediated endocytosis defective; reduced brood size; thin; transgene expression increased	NOT WBPheno: Bmd; Variant; transgene subcellular localization variant
WBGene00015697|C10H11.8	0.3	0.05	6		382 aa			COG2319: FOG: WD40 repeat; KOG0315: G-protein beta subunit-like protein (contains WD40 repeats); meNOG06256: G protein beta subunit-like	PF00400: WD domain, G-beta repeat	WBPhenotype: Gro; Lva; developmental delay; fat content increased; small; thin	NOT WBPheno: Bmd; Emb; Ste; Variant
WBGene00014246|ZK1307.3	3.84	0.64	6		115 aa	Seg			PF00635: MSP (Major sperm protein) domain
WBGene00012197|W02B8.1	0.18	0	6		179 aa	SignalP; Tmhmm; Seg					NOT WBPheno: Bmd; Emb; Ste; Variant
WBGene00011006|R04B5.9|ugt-47	2.58	0.43	6	OMIM:143500 [GILBERT SYNDROME]; OMIM:218800 [CRIGLER-NAJJAR SYNDROME]; OMIM:237900 [HYPERBILIRUBINEMIA, TRANSIENT FAMILIAL NEONATAL]; OMIM:601816 [BILIRUBIN, SERUM LEVEL OF, QUANTITATIVE TRAIT LOCUS 1; BILIQTL1]; OMIM:606785 [CRIGLER-NAJJAR SYNDROME, TYPE II]; OMIM:612560 [BONE MINERAL DENSITY QUANTITATIVE TRAIT LOCUS 12; BMND12]	536 aa	SignalP; Tmhmm; Seg		KOG1192: UDP-glucuronosyl and UDP-glucosyl transferase; meNOG23463: CG17932-PA, isoform A protein	PF00201: UDP-glucoronosyl and UDP-glucosyl transferase; PF04101: Glycosyltransferase family 28 C-terminal domain		NOT WBPheno: Emb; Gro; Lva; Lvl; Ste; Stp; Variant; postembryonic development variant
WBGene00007416|C07E3.5|ceh-52	0.18	0	6		343 aa	Seg	Thomas+W_TF		PF00046: Homeobox domain		NOT WBPheno: Bmd; Emb; Gro; Let; Lva; Lvl; Ste; Stp; Variant; postembryonic development variant
WBGene00005657|C13D9.1|srr-6	0.18	0	6		410 aa	Tmhmm; Seg			PF03268: Caenorhabditis protein of unknown function, DUF267
WBGene00001924|F07B7.9|his-50	0.18	0	6		103 aa	Seg		COG2036: Histones H3 and H4; KOG3467: Histone H4; meNOG20073: Histone H4 protein	PF00125: Core histone H2A/H2B/H3/H4; PF00808: Histone-like transcription factor (CBF/NF-Y) and archaeal histone; PF02969: TATA box binding protein associated factor (TAF)
WBGene00001902|K06C4.2|his-28	0.18	0	6		103 aa	Seg		COG2036: Histones H3 and H4; KOG3467: Histone H4; meNOG20073: Histone H4 protein	PF00125: Core histone H2A/H2B/H3/H4; PF00808: Histone-like transcription factor (CBF/NF-Y) and archaeal histone; PF02969: TATA box binding protein associated factor (TAF)
WBGene00001759|R11G1.3|gst-11	0.18	0	6		203 aa			KOG1695: Glutathione S-transferase; meNOG14525: Glutathione protein	PF00043: Glutathione S-transferase, C-terminal domain; PF02798: Glutathione S-transferase, N-terminal domain		NOT WBPheno: Bmd; Emb; Let; Ste; Variant; postembryonic development variant
WBGene00004873|Y47D3A.26|smc-3	4.79	0.8	5.99	OMIM:610759 [CORNELIA DE LANGE SYNDROME 3; CDLS3]	1205-1261 aa	Ncoils		COG1196: Chromosome segregation ATPases; KOG0964: Structural maintenance of chromosome protein 3 (sister chromatid cohesion complex Cohesin, subunit SMC3); meNOG05549: Chromosome protein	PF02463: RecF/RecN/SMC N terminal domain; PF06470: SMC proteins Flexible Hinge Domain	WBPhenotype: Adl; Bli; Emb; Gro; Pvl; Rup; Ste; Stp; Unc; pattern of transgene expression variant; receptor mediated endocytosis defective	NOT WBPheno: Bmd; Variant
WBGene00001500|C54F6.14|ftn-1	7.85	1.31	5.99	OMIM:134770 [FERRITIN HEAVY CHAIN 1; FTH1]; OMIM:600886 [HYPERFERRITINEMIA-CATARACT SYNDROME]; OMIM:606159 [NEURODEGENERATION WITH BRAIN IRON ACCUMULATION 3; NBIA3]	170 aa	Seg		COG1528: Ferritin-like protein; KOG2332: Ferritin; meNOG08428: Stores iron in a soluble, non-toxic, readily available form. Important for iron protein	PF00210: Ferritin-like domain	WBPhenotype: Age; Emb	NOT WBPheno: Bmd; Gro; Let; Lva; Lvl; Ste; Stp; Variant; postembryonic development variant
WBGene00003046|F37H8.1|lir-3	9.84	1.65	5.96		284 aa	Seg	Thomas+W_TF				NOT WBPheno: Bmd; Emb; Gro; Let; Lva; Lvl; Ste; Stp; Variant; postembryonic development variant
WBGene00016095|C25E10.5	3.74	0.63	5.94	OMIM:610951 [CEROID LIPOFUSCINOSIS, NEURONAL, 7; CLN7]	492 aa	Tmhmm; Seg		KOG2325: Predicted transporter/transmembrane protein; meNOG06557: Major facilitator superfamily domain containing protein			NOT WBPheno: Bmd; Emb; Gro; Let; Lva; Lvl; Ste; Stp; Variant; postembryonic development variant
WBGene00003947|K08D12.1|pbs-1	2326.72	393.81	5.91		239 aa			COG0638: 20S proteasome, alpha and beta subunits; KOG0174: 20S proteasome, regulatory subunit beta type PSMB6/PSMB9/PRE3; meNOG08394: Proteasome protein	PF00227: Proteasome subunit	WBPhenotype: Emb
WBGene00018837|F54G2.1	1.53	0.26	5.88	OMIM:608898 [HEMOPHAGOCYTIC LYMPHOHISTIOCYTOSIS, FAMILIAL, 3; FHL3]	961-1265 aa	Seg		KOG1328: Synaptic vesicle protein BAIAP3, involved in vesicle priming/regulation; meNOG04823: Unc-13 homolog D protein	PF00168: C2 domain; PF10540: Munc13 (mammalian uncoordinated) homology domain	WBPhenotype: Ric	NOT WBPheno: Bmd; Emb; Gro; Let; Lva; Lvl; Ste; Stp; Variant; organism pathogen response variant; postembryonic development variant
WBGene00019944|R07G3.8	0.88	0.15	5.87		334 aa			KOG3951: Uncharacterized conserved protein; meNOG06338: Protein FAM49B	PF07159: Protein of unknown function (DUF1394)		NOT WBPheno: Bmd; Emb; Gro; Let; Lva; Lvl; Ste; Stp; Variant; postembryonic development variant
WBGene00022482|Y119D3B.4|fbxa-208	24.75	4.22	5.86		90 aa						NOT WBPheno: Bmd; Emb; Ste; Variant
WBGene00022043|Y65B4BR.8	1.23	0.21	5.86		193 aa	Seg		KOG1106: Uncharacterized conserved protein	PF05916: GINS complex subunit Sld5	WBPhenotype: Bmd; Emb; Pvl; Unc; late embryonic arrest; pattern of transgene expression variant; receptor mediated endocytosis defective; reduced brood size; transgene subcellular localization variant	NOT WBPheno: Ste; Variant
WBGene00021934|Y55F3AR.3|cct-8	0.41	0.07	5.86		548 aa	Seg; Ncoils		COG0459: Chaperonin GroEL (HSP60 family); KOG0362: Chaperonin complex component, TCP-1 theta subunit (CCT8); meNOG05621: T-Complex protein 1 subunit theta (TCP-1-theta)	PF00118: TCP-1/cpn60 chaperonin family	WBPhenotype: Emb; Lva; Sck; Ste; Unc; distal tip cell migration variant; pattern of transgene expression variant; receptor mediated endocytosis defective
WBGene00000963|R06C7.3|dhp-1	8.35	1.43	5.84	OMIM:222748 [DIHYDROPYRIMIDINASE DEFICIENCY]	489 aa			COG0044: Dihydroorotase and related cyclic amidohydrolases; KOG2584: Dihydroorotase and related enzymes; meNOG06435: Dihydropyrimidinase	PF01979: Amidohydrolase family		NOT WBPheno: Bmd; Emb; Gro; Let; Lva; Lvl; Ste; Stp; Variant; glp; postembryonic development variant
WBGene00009744|F45H11.3	16.24	2.79	5.82		738 aa	Seg; Ncoils				WBPhenotype: Emb	NOT WBPheno: Adl; Bmd; Gro; Let; Lva; Lvl; Ste; Stp; Variant; postembryonic development variant
WBGene00007366|C06B3.7	0.29	0.05	5.8	OMIM:132810 [EPOXIDE HYDROLASE 1, MICROSOMAL; EPHX1]; OMIM:189800 [PREECLAMPSIA/ECLAMPSIA 1; PEE1]; OMIM:607748 [HYPERCHOLANEMIA, FAMILIAL; FHCA]	303 aa	Seg					NOT WBPheno: Bmd; Emb; Gro; Let; Lva; Lvl; Ste; Stp; Variant; postembryonic development variant
WBGene00012110|T28A8.4	2.43	0.42	5.79		469 aa	Seg			PF04435: Domain of unknown function (DUF545)		NOT WBPheno: Bmd; Emb; Gro; Let; Lva; Lvl; Ste; Stp; Variant; embryonic development variant; postembryonic development variant
WBGene00002021|F52E1.7|hsp-17	45.68	7.89	5.79	OMIM:608810 [MYOPATHY, MYOFIBRILLAR, 2, MFM2]; OMIM:613763 [CATARACT, POSTERIOR POLAR, 2; CTPP2]; OMIM:613869 [MYOPATHY, MYOFIBRILLAR, FATAL INFANTILE HYPERTONIC, ALPHA-B CRYSTALLIN-RELATED]	148-149 aa	Seg		KOG3591: Alpha crystallins; meNOG13466: Heat shock protein	PF00011: Hsp20/alpha crystallin family		NOT WBPheno: Bmd; Emb; Let; Ste; Variant; postembryonic development variant
WBGene00008018|C38H2.1|tbc-8	0.75	0.13	5.77		903 aa	Seg		COG5210: GTPase-activating protein; KOG1648: Uncharacterized conserved protein, contains RUN, BRK and TBC domains; meNOG04291: RUN and TBC1 domain containing 1 protein	PF00566: TBC domain; PF02759: RUN domain		NOT WBPheno: Bmd; Emb; Gro; Let; Lva; Lvl; Ste; Stp; Variant; embryonic development variant; postembryonic development variant
WBGene00003020|C32F10.2|lin-35	14.18	2.46	5.76		961 aa	Seg; Ncoils	Gupta_TF	KOG1010: Rb (Retinoblastoma tumor suppressor)-related protein; meNOG05829: Retinoblastoma-Like protein	PF01857: Retinoblastoma-associated protein B domain; PF01858: Retinoblastoma-associated protein A domain; PF11934: Domain of unknown function (DUF3452)	WBPhenotype: Bmd; Dyf; Egl; Emb; Gro; Let; Lva; Muv; RNAi enhanced; Rup; Ste; ectopic expression transgene; pharyngeal morphology variant; pharynx unattached; reduced brood size; somatic transgene silencing variant; transgene expression increased; vulva morphology variant	NOT WBPheno: Adl; Lvl; Stp; Variant; carbon dioxide avoidance variant; cell cycle variant; postembryonic development variant; protein subcellular localization variant
WBGene00019984	0.23	0.04	5.75
WBGene00016562|C41D11.3	0.23	0.04	5.75		488-532 aa	Seg		KOG3813: Uncharacterized conserved protein (tumor-suppressor AXUD1 in humans); meNOG09465: Tgf-Beta-Induced apoptosis protein			NOT WBPheno: Bmd; Emb; Gro; Let; Lva; Lvl; Ste; Stp; Variant; postembryonic development variant
WBGene00001007|C39E9.14|dli-1	56.42	9.82	5.75		441-443 aa	Seg		KOG3905: Dynein light intermediate chain; meNOG06718: Light intermediate chain protein	PF05783: Dynein light intermediate chain (DLIC)	WBPhenotype: Emb; Mul; Muv; Ocs; Pvl; Rup; Ste; Unc; cell division failure; pattern of transgene expression variant; receptor mediated endocytosis defective; reduced brood size; transgene subcellular localization variant	NOT WBPheno: meiotic spindle defective early emb
WBGene00017834|F26F12.3	24.62	4.31	5.71		648-890 aa	Seg					NOT WBPheno: Bmd; Emb; Gro; Let; Lva; Lvl; Ste; Stp; Variant; postembryonic development variant
WBGene00016033|C24A3.2	287.08	50.26	5.71		73 aa	SignalP; Tmhmm					NOT WBPheno: Let; Variant; postembryonic development variant
WBGene00001891|K06C4.5|his-17	7.94	1.39	5.71		136 aa			COG2036: Histones H3 and H4; KOG1745: Histones H3 and H4; meNOG18419: Histone H3 protein	PF00125: Core histone H2A/H2B/H3/H4
WBGene00012853|Y44A6D.2	0.91	0.16	5.69		76 aa	Seg					NOT WBPheno: Bmd; Emb; Gro; Let; Lva; Lvl; Ste; Stp; Variant; postembryonic development variant
WBGene00000556|R09B5.3|cnc-2	4.09	0.72	5.68		72 aa	SignalP; Tmhmm; Seg					NOT WBPheno: Bmd; Emb; Gro; Let; Lva; Lvl; Ste; Stp; Variant; postembryonic development variant; transgene expression reduced
WBGene00007929|C34D1.1	0.17	0	5.67		269 aa	Seg	Thomas+W_TF	KOG3815: Transcription factor Doublesex	PF00751: DM DNA binding domain		NOT WBPheno: Emb; Gro; Let; Lva; Lvl; Ste; Stp; Variant; postembryonic development variant
WBGene00006306|F07A5.5|sue-1	37.8	6.67	5.67		537 aa	Seg			PF00168: C2 domain		NOT WBPheno: Bmd; Emb; Gro; Let; Lva; Lvl; Ste; Stp; Variant; postembryonic development variant
WBGene00012936|Y47D3A.29	36.44	6.44	5.66		1428-1456 aa	Seg; Ncoils		COG0417: DNA polymerase elongation subunit (family B); KOG0970: DNA polymerase alpha, catalytic subunit; meNOG05550: Polymerase	PF00136: DNA polymerase family B; PF03104: DNA polymerase family B, exonuclease domain; PF08996: DNA Polymerase alpha zinc finger; PF12254: DNA polymerase alpha subunit p180 N terminal	WBPhenotype: Age; Emb
WBGene00011061|R06C7.1	483.4	85.9	5.63		945 aa	Seg		KOG1041: Translation initiation factor 2C (eIF-2C) and related proteins	PF02170: PAZ domain; PF02171: Piwi domain		NOT WBPheno: Bmd; Emb; Let; Ste; Variant; postembryonic development variant
WBGene00005655|K11D12.3|srr-4	5.97	1.06	5.63		403 aa	Tmhmm			PF03268: Caenorhabditis protein of unknown function, DUF267		NOT WBPheno: Bmd; Emb; Gro; Let; Lva; Lvl; Ste; Stp; Variant; postembryonic development variant
WBGene00015929|C17H12.3	81.76	14.55	5.62		374 aa			COG5599: Protein tyrosine phosphatase; KOG0789: Protein tyrosine phosphatase; meNOG08447: Protein tyrosine phosphatase, non-receptor type 18 (Brain-derived)	PF00102: Protein-tyrosine phosphatase		NOT WBPheno: Bmd; Emb; Gro; Let; Lva; Lvl; Ste; Stp; Variant; postembryonic development variant
WBGene00009308|F32A11.3	159.72	28.44	5.62		353 aa	Seg				WBPhenotype: Ste	NOT WBPheno: Bmd; Emb; Gro; Let; Lva; Lvl; Stp; Variant; postembryonic development variant
WBGene00000163|R11A5.1|apb-3	4.49	0.8	5.61	OMIM:203300 [HERMANSKY-PUDLAK SYNDROME 1; HPS1]; OMIM:608233 [HERMANSKY-PUDLAK SYNDROME 2; HPS2]	908-918 aa	Seg; Ncoils		COG5096: Vesicle coat complex, various subunits; KOG1060: Vesicle coat complex AP-3, beta subunit; meNOG05107: Protein complex 3	PF01602: Adaptin N terminal region	WBPhenotype: Dpy; Emb; Glo; Lva; fat content reduced; gut granule birefringence misplaced	NOT WBPheno: Bmd; Gro; Let; Lvl; Ste; Stp; Variant; fat content variant; postembryonic development variant; protein aggregation variant; transgene subcellular localization variant
WBGene00044238|C30H6.12	0.56	0.1	5.6		179 aa	Seg
WBGene00020366|T08G2.3|acdh-10	114.21	20.39	5.6	OMIM:201450 [ACYL-CoA DEHYDROGENASE, MEDIUM-CHAIN, DEFICIENCY OF; ACADMD]	417 aa	Seg		COG1960: Acyl-CoA dehydrogenases; KOG0140: Medium-chain acyl-CoA dehydrogenase; meNOG05310: Acyl-Coa dehydrogenase	PF00441: Acyl-CoA dehydrogenase, C-terminal domain; PF02770: Acyl-CoA dehydrogenase, middle domain; PF02771: Acyl-CoA dehydrogenase, N-terminal domain; PF08028: Acyl-CoA dehydrogenase, C-terminal domain	WBPhenotype: Ste; fertility reduced	NOT WBPheno: Bmd; Emb; Let; Variant; postembryonic development variant
WBGene00000294|F41G4.2|cas-1	919.44	164.46	5.59		495-1256 aa	Seg		KOG2675: Adenylate cyclase-associated protein (CAP/Srv2p); meNOG04717: Cyclase-Associated protein	PF01213: Adenylate cyclase associated (CAP) N terminal		NOT WBPheno: Bmd; Emb; Gro; Lva; Lvl; Ste; Stp; Variant; postembryonic development variant
WBGene00014176|ZK1010.2	123.43	22.11	5.58		374 aa			COG1723: Uncharacterized conserved protein; KOG2861: Uncharacterized conserved protein; meNOG08618: Required for meiotic nuclear division protein	PF02582: Uncharacterised ACR, YagE family COG1723		NOT WBPheno: Bmd; Emb; Gro; Let; Lva; Lvl; Ste; Stp; Variant; postembryonic development variant; protein aggregation variant; transgene subcellular localization variant
WBGene00009677|F44A6.5	11.16	2	5.58		250 aa						NOT WBPheno: Bmd; Emb; Let; Ste; Variant; postembryonic development variant
WBGene00007460|C08F11.13	15.42	2.77	5.57		404 aa	Tmhmm; Seg
WBGene00001478|Y39A1A.19|fmo-3	8.5	1.53	5.56		512 aa			COG2072: Predicted flavoprotein involved in K+ transport; KOG1399: Flavin-containing monooxygenase; meNOG12877: Monooxygenase	PF07992: Pyridine nucleotide-disulphide oxidoreductase	WBPhenotype: Ste; Stp	NOT WBPheno: Bmd; Emb; Variant; embryonic development variant; postembryonic development variant
WBGene00004442|R11D1.8|rpl-28	1139.67	205.17	5.55		126 aa			KOG3412: 60S ribosomal protein L28; meNOG19383: Ribosomal protein L28			NOT WBPheno: Bmd; Emb; Let; Ste; Variant; postembryonic development variant
WBGene00009531|F38B2.4	7.59	1.37	5.54	OMIM:612631 [ADENYLATE KINASE DEFICIENCY, HEMOLYTIC ANEMIA DUE TO]	210 aa			COG0563: Adenylate kinase and related kinases; KOG3079: Uridylate kinase/adenylate kinase; meNOG07915: Adenylate kinase	PF00406: Adenylate kinase		NOT WBPheno: Bmd; Emb; Gro; Let; Lva; Lvl; Ste; Stp; Variant; postembryonic development variant
WBGene00020652|T21E3.1|egg-4	67.37	12.19	5.53		753 aa	Seg		COG5599: Protein tyrosine phosphatase; KOG0789: Protein tyrosine phosphatase	PF00102: Protein-tyrosine phosphatase	WBPhenotype: Ste	NOT WBPheno: Let
WBGene00022078|Y69A2AR.7	6.4	1.16	5.52		187-271 aa	Seg		KOG4493: Uncharacterized conserved protein; meNOG09847: UPF0453 protein C12orf44	PF07855: Protein of unknown function (DUF1649)		NOT WBPheno: Bmd; Emb; Ste; Variant
WBGene00007787|C27H6.8	1240.82	226.46	5.48		340 aa			COG4286: Uncharacterized conserved protein related to MYG1 family; KOG2948: Predicted metal-binding protein; meNOG04227: UPF0160 protein	PF03690: Uncharacterised protein family (UPF0160)		NOT WBPheno: Bmd; Emb; Gro; Let; Lva; Lvl; Ste; Stp; Variant; postembryonic development variant
WBGene00012348|W08G11.4|pptr-1	18.48	3.38	5.47		542 aa	Seg		KOG2085: Serine/threonine protein phosphatase 2A, regulatory subunit; meNOG05391: Serine/Threonine-Protein phosphatase 2A 56 kDa regulatory subunit epsilon isoform (PP2A, B subunit, B' epsilon isoform)	PF01603: Protein phosphatase 2A regulatory B subunit (B56 family)	WBPhenotype: Age; Daf c; Gro; Ric; mRNA levels reduced; protein subcellular localization variant; thermotolerance increased; transgene expression reduced	NOT WBPheno: Bmd; Dyf; Emb; Let; Lva; Lvl; Ste; Stp; Variant; fat content increased; postembryonic development variant
WBGene00045397|Y54G2A.52	7.3	1.34	5.45		97 aa	SignalP; Tmhmm; Seg
WBGene00006057|F47B8.11|sss-2	953.53	174.99	5.45		187 aa	Seg					NOT WBPheno: Bmd; Emb; Let; Ste; Variant; postembryonic development variant
WBGene00017275|F08F8.10	10.66	1.96	5.44		484-487 aa	Seg; Ncoils				WBPhenotype: Gro	NOT WBPheno: Bmd; Emb; Lva; Lvl; Ste; Stp; Variant; postembryonic development variant
WBGene00010192|F57B7.2	43.77	8.05	5.44		289-330 aa	SignalP; Seg		COG2340: Uncharacterized protein with SCP/PR1 domains; KOG3017: Defense-related protein containing SCP domain; meNOG17444: Golgi-Associated plant pathogenesis-related protein 1	PF00188: Cysteine-rich secretory protein family		NOT WBPheno: Bmd; Emb; Gro; Let; Lva; Lvl; Ste; Stp; Variant; postembryonic development variant
WBGene00006628|C02F5.11|tsp-2	6.53	1.2	5.44		234 aa	SignalP; Tmhmm; Seg		KOG3882: Tetraspanin family integral membrane protein	PF00335: Tetraspanin family		NOT WBPheno: Bmd; Emb; Ste; Variant
WBGene00006572|C06G3.11|tin-9.1	7.71	1.42	5.43		78-90 aa			KOG3479: Mitochondrial import inner membrane translocase, subunit TIM9; meNOG20403: Protein involved in protein localization in mitochondrion		WBPhenotype: Emb; Pvl; Sck; Unc; growth variant; mitochondrial metabolism variant; reduced brood size; small	NOT WBPheno: Bmd; Ste; Variant
WBGene00001915|C50F4.5|his-41	208.24	38.35	5.43		123 aa	Seg		KOG1744: Histone H2B; meNOG20185: Histone H2B protein	PF00125: Core histone H2A/H2B/H3/H4; PF00808: Histone-like transcription factor (CBF/NF-Y) and archaeal histone	WBPhenotype: Emb; Let; Lva; Sck; Ste; reduced brood size
WBGene00001451|F31F6.4|flp-8	83.15	15.37	5.41		134-135 aa	SignalP			PF01581: FMRFamide related peptide family		NOT WBPheno: Bmd; Emb; Gro; Lva; Lvl; Ste; Stp; Variant; postembryonic development variant
WBGene00001427|Y18D10A.19|fkb-2	42.88	7.92	5.41		108 aa			COG0545: FKBP-type peptidyl-prolyl cis-trans isomerases 1; KOG0544: FKBP-type peptidyl-prolyl cis-trans isomerase; meNOG19378: Cis- trans protein	PF00254: FKBP-type peptidyl-prolyl cis-trans isomerase
WBGene00015643|C09E7.9	1.08	0.2	5.4		789 aa	Seg; Ncoils			PF00097: Zinc finger, C3HC4 type (RING finger)
WBGene00011800|T16G1.6	2.54	0.47	5.4		431 aa	Seg		NOG74514: Znf_C4 abd HLH domain containing kinases domain-containing protein; euNOG14338: Znf_C4 abd HLH domain containing kinases domain-containing protein; meNOG24447: Znf_C4 abd HLH domain containing kinases domain-containing protein	PF01636: Phosphotransferase enzyme family; PF02958: Domain of unknown function (DUF227); PF07914: Protein of unknown function (DUF1679)	WBPhenotype: Gro; cadmium hypersensitive	NOT WBPheno: Bmd; Emb; Let; Lva; Lvl; Ste; Stp; Variant; postembryonic development variant
WBGene00019504|K07H8.2	123.93	23.03	5.38		429-507 aa	SignalP; Tmhmm; Seg		KOG3788: Predicted divalent cation transporter; meNOG04972: Solute carrier family 41, member protein	PF01769: Divalent cation transporter		NOT WBPheno: Bmd; Emb; Gro; Let; Lva; Lvl; Ste; Stp; Variant; postembryonic development variant
WBGene00018852|F55A3.7	1.98	0.37	5.35		491 aa	Seg; Ncoils		COG5406: Nucleosome binding factor SPN, SPT16 subunit; KOG1189: Global transcriptional regulator, cell division control protein; meNOG04833: Component of the FACT complex, a general chromatin factor that acts to reorganize nucleosomes. The FACT complex is involved in multiple processes that require DNA as a template such as mRNA elongation, DNA replication and DNA repair. During transcription elo…	PF08644: FACT complex subunit (SPT16/CDC68)	WBPhenotype: Emb	NOT WBPheno: Bmd; Ste; Variant
WBGene00044917|F40F8.12	0.16	0	5.33		115 aa	SignalP; Tmhmm; Seg
WBGene00018067|F35G8.1	0.16	0	5.33		380 aa	Tmhmm; Seg		KOG3656: FOG: 7 transmembrane receptor; meNOG12169: Neuropeptide FF receptor 2 (Neuropeptide G-protein coupled receptor)	PF00001: 7 transmembrane receptor (rhodopsin family); PF10320: Serpentine type 7TM GPCR chemoreceptor Srsx	WBPhenotype: hyperactive egg laying	NOT WBPheno: Bmd; Emb; Gro; Lva; Lvl; Ste; Stp; Unc; Variant; organism pathogen response variant; postembryonic development variant
WBGene00016998|D1005.4	0.16	0	5.33		112 aa						NOT WBPheno: Bmd; Emb; Ste; Variant
WBGene00011117|R07E5.11	0.16	0	5.33		113 aa	Seg				WBPhenotype: Gro	NOT WBPheno: Bmd; Emb; Let; Lva; Lvl; Ste; Stp; Variant; embryonic development variant; postembryonic development variant
WBGene00003806|Y77E11A.13|npp-20	0.16	0	5.33		211-313 aa			COG2319: FOG: WD40 repeat; KOG1332: Vesicle coat complex COPII, subunit SEC13; meNOG06811: Protein sec13	PF00400: WD domain, G-beta repeat	WBPhenotype: Dpy; Emb; Gro; Lva; Lvl; Nmo; Sck; Ste; Stp; Unc; cell secretion variant; cleavage furrow initiation defective early emb; germ cell morphology variant; pattern of transgene expression variant; receptor mediated endocytosis defective; reduced brood size; transgene subcellular localization variant
WBGene00000889|Y116A8C.34|cyn-13	0.16	0	5.33		103-331 aa	Seg		COG0652: Peptidyl-prolyl cis-trans isomerase (rotamase) - cyclophilin family; COG0724: RNA-binding proteins (RRM domain); KOG0111: Cyclophilin-type peptidyl-prolyl cis-trans isomerase; meNOG05444: Isomerase	PF00076: RNA recognition motif. (a.k.a. RRM, RBD, or RNP domain); PF00160: Cyclophilin type peptidyl-prolyl cis-trans isomerase/CLD		NOT WBPheno: Bmd; Emb; Let; Ste; Variant; postembryonic development variant
WBGene00004345|F16H9.1|rgs-2	1.38	0.26	5.31		162-181 aa			KOG3589: G protein signaling regulators; meNOG09490: Regulator of g protein signaling	PF00615: Regulator of G protein signaling domain		NOT WBPheno: Bmd; Emb; Gro; Let; Lva; Lvl; Ste; Stp; Variant; postembryonic development variant
WBGene00013361|Y60A3A.13|fars-2	381.59	72.03	5.3		74-458 aa			COG0016: Phenylalanyl-tRNA synthetase alpha subunit; COG0072: Phenylalanyl-tRNA synthetase beta subunit; KOG2783: Phenylalanyl-tRNA synthetase; meNOG05637: Trna synthetase	PF01409: tRNA synthetases class II core domain (F)		NOT WBPheno: Bmd; Emb; Ste; Variant
WBGene00010262|F58E10.7	461.2	86.99	5.3		158 aa	SignalP					NOT WBPheno: Bmd; Emb; Gro; Let; Lva; Lvl; Ste; Stp; Variant; postembryonic development variant
WBGene00004910|T03F7.1|snf-11	0.37	0.07	5.29	OMIM:103780 [ALCOHOL DEPENDENCE]; OMIM:125480 [MAJOR AFFECTIVE DISORDER 1; MAFD1]; OMIM:143465 [ATTENTION DEFICIT-HYPERACTIVITY DISORDER; ADHD]; OMIM:149400 [HYPEREKPLEXIA, HEREDITARY]; OMIM:164230 [OBSESSIVE-COMPULSIVE DISORDER; OCD]; OMIM:188890 [TOBACCO ADDICTION, SUSCEPTIBILITY TO]; OMIM:300306 [BODY MASS INDEX QUANTITATIVE TRAIT LOCUS 11; BMIQ11]; OMIM:300352 [CREATINE DEFICIENCY SYNDROME, X…	610 aa	Tmhmm; Seg		COG0733: Na+-dependent transporters of the SNF family; KOG3660: Sodium-neurotransmitter symporter; meNOG05168: Transporter protein	PF00209: Sodium:neurotransmitter symporter family	WBPhenotype: Variant	NOT WBPheno: Bmd; Emb; Let; Ste
WBGene00010763|K10H10.7	12.52	2.37	5.28		132 aa	Seg		KOG4102: Uncharacterized conserved protein; meNOG20755: Protein phosphatase 1	PF07491: Protein phosphatase inhibitor		NOT WBPheno: Bmd; Emb; Gro; Let; Lva; Lvl; Ste; Stp; Variant; postembryonic development variant
WBGene00006840|R05D3.7|unc-116	27.09	5.13	5.28	OMIM:604187 [SPASTIC PARAPLEGIA 10, AUTOSOMAL DOMINANT; SPG10]	815 aa	Seg; Ncoils		COG5059: Kinesin-like protein; KOG0240: Kinesin (SMY1 subfamily); meNOG05070: Heavy chain protein	PF00225: Kinesin motor domain	WBPhenotype: Emb; Unc; meiotic chromosome segregation variant; meiotic spindle defective; meiotic spindle positioning defective; meiotic spindle rotation defective; protein expression reduced; reduced brood size	NOT WBPheno: germ cell morphology variant; meiotic spindle assembly defective
WBGene00003762|F35B12.7|nlp-24	52.32	9.93	5.27		80 aa	SignalP; Tmhmm; Seg				WBPhenotype: response to food variant	NOT WBPheno: Age; Bmd; Emb; Gro; Let; Lva; Lvl; Ste; Stp; Variant; nicotine response variant; postembryonic development variant
WBGene00044811|F12E12.11	3.58	0.68	5.26		280 aa			COG1028: Dehydrogenases with different specificities (related to short-chain alcohol dehydrogenases); KOG0725: Reductases with broad range of substrate specificities; meNOG10313: Dehydrogenase/Reductase SDR family member 10 EC	PF00106: short chain dehydrogenase; PF08659: KR domain
WBGene00043147|C24D10.8|nspd-6	29.17	5.55	5.26		71 aa	Seg
WBGene00011743|T13F2.2	2638.47	501.16	5.26		124 aa	Seg; Ncoils		KOG2712: Transcriptional coactivator; meNOG20242: Transcriptional protein		WBPhenotype: Let; Ste	NOT WBPheno: Bmd; Emb; Gro; Lva; Lvl; Stp; Variant; postembryonic development variant
WBGene00008892|F16H6.2|clec-246	6.37	1.21	5.26		178 aa	SignalP; Seg		KOG4297: C-type lectin			NOT WBPheno: Bmd; Emb; Let; Ste; Variant; postembryonic development variant
WBGene00006736|T10F2.3|ulp-1	36.52	6.94	5.26		697 aa	Seg		COG5160: Protease, Ulp1 family; KOG0778: Protease, Ulp1 family; meNOG12478: Sentrin/Sumo-Specific protease	PF02902: Ulp1 protease family, C-terminal catalytic domain	WBPhenotype: Age; Bmd; Gro; Sck; Stp; age associated fluorescence increased	NOT WBPheno: Emb; Let; Ste; Variant; embryonic development variant; postembryonic development variant; protein aggregation variant; transgene subcellular localization variant
WBGene00008356|D1025.4|nspc-20	153.65	29.27	5.25		103 aa	SignalP
WBGene00013223|Y55D9A.1|efa-6	204.68	39.05	5.24		634-818 aa	Seg		COG5307: SEC7 domain proteins; KOG0932: Guanine nucleotide exchange factor EFA6; meNOG06131: And Sec7 domain containing protein	PF00169: PH domain; PF01369: Sec7 domain	WBPhenotype: Emb	NOT WBPheno: Bmd; Dyf; Gro; Let; Lva; Lvl; Ste; Stp; Variant; coelomocyte uptake defective; postembryonic development variant
WBGene00011746|T13F2.6	93.25	17.81	5.24		579 aa	Seg				WBPhenotype: Emb; fat content reduced	NOT WBPheno: Bmd; Gro; Let; Lva; Lvl; Ste; Stp; Variant; postembryonic development variant
WBGene00004701|EEED8.7|rsp-4	3306.43	630.53	5.24		126-196 aa	Seg		KOG4207: Predicted splicing factor, SR protein superfamily; meNOG20177: Splicing factor, arginine/serine-rich 2	PF00076: RNA recognition motif. (a.k.a. RRM, RBD, or RNP domain)	WBPhenotype: cell proliferation increased; excess intestinal cells	NOT WBPheno: Bmd; Emb; Gro; Let; Lva; Lvl; Sck; Ste; Stp; Variant; growth variant; postembryonic development variant; sterile F1
WBGene00022623|ZC487.1	1.57	0.3	5.23		409-411 aa					WBPhenotype: body wall muscle myosin organization defective	NOT WBPheno: Bmd; Emb; Gro; Let; Lva; Lvl; Ste; Stp; Variant; postembryonic development variant
WBGene00003801|C29E4.4|npp-15	0.68	0.13	5.23		1127 aa			KOG4121: Nuclear pore complex, Nup133 component (sc Nup133); meNOG06832: Nuclear pore complex protein Nup133	PF03177: Non-repetitive/WGA-negative nucleoporin C-terminal	WBPhenotype: Emb; Gro	NOT WBPheno: Bmd; Lva; Lvl; Nmo; Ste; Stp; Variant; embryonic development variant; postembryonic development variant
WBGene00044070|T22A3.4|set-18	17.18	3.29	5.22		501-507 aa			COG2940: Proteins containing SET domain; KOG2084: Predicted histone tail methylase containing SET domain; meNOG07342: SET and MYND domain containing protein	PF01753: MYND finger		NOT WBPheno: Emb; Gro; Let; Lva; Lvl; Ste; Stp; Variant; postembryonic development variant
WBGene00006434|F09E5.15|prdx-2	3242.3	621.76	5.21		195-199 aa			COG0450: Peroxiredoxin; KOG0852: Alkyl hydroperoxide reductase, thiol specific antioxidant and related enzymes; meNOG04456: Peroxiredoxin protein	PF00578: AhpC/TSA family; PF08534: Redoxin; PF10417: C-terminal domain of 1-Cys peroxiredoxin	WBPhenotype: Age; Sck; aging variant; gene expression level high; metal response variant; organism oxidative stress response hypersensitive; organism temperature response variant; reduced brood size; small
WBGene00003092|Y22F5A.6|lys-3	4.22	0.81	5.21		301 aa	SignalP		NOG75899: Lysozyme family member lys protein; euNOG09508: Lysozyme family member lys protein			NOT WBPheno: Bmd; Emb; Gro; Let; Lva; Lvl; Ste; Stp; Variant; postembryonic development variant; transgene expression reduced
WBGene00007203|B0564.3	0.52	0.1	5.2	OMIM:153700 [MACULAR DYSTROPHY, VITELLIFORM; VMD]; OMIM:153870 [MACULAR DYSTROPHY, CONCENTRIC ANNULAR]; OMIM:193220 [VITREORETINOCHOROIDOPATHY; VRCP]; OMIM:608161 [MACULAR DYSTROPHY, VITELLIFORM, ADULT-ONSET]; OMIM:611809 [BESTROPHINOPATHY, AUTOSOMAL RECESSIVE; ARB]; OMIM:613194 [RETINITIS PIGMENTOSA 50; RP50]	450 aa	Tmhmm		KOG3547: Bestrophin (Best vitelliform macular dystrophy-associated protein); meNOG06040: Bestrophin protein	PF01062: Bestrophin		NOT WBPheno: Bmd; Emb; Ste; Variant
WBGene00003442|C34F11.6|msp-49	104.2	20.03	5.2		127 aa				PF00635: MSP (Major sperm protein) domain		NOT WBPheno: Let; Variant; postembryonic development variant
WBGene00004962|F53G12.6|spe-8	37.23	7.2	5.17		512 aa	Seg		COG0515: Serine/threonine protein kinase; KOG0194: Protein tyrosine kinase; meNOG06948: Tyrosine-Protein kinase	PF00017: SH2 domain; PF00069: Protein kinase domain; PF07714: Protein tyrosine kinase	WBPhenotype: anoxia hypersensitive; hermaphrodite self sterile; spermatid activation defective; spermatogenesis defective hermaphrodite; unfertilized oocytes laid	NOT WBPheno: Bmd; Egl D; Emb; Gro; Lva; Lvl; Ste; Stp; Variant; postembryonic development variant
WBGene00004915|W08E3.1|snr-2	4.34	0.84	5.17		160 aa	Seg		COG1958: Small nuclear ribonucleoprotein (snRNP) homolog; KOG3168: U1 snRNP component; meNOG18649: Small nuclear ribonucleoprotein	PF01423: LSM domain	WBPhenotype: Emb; Emo; Lva; Muv; Rup; Ste; cell proliferation increased; excess intestinal cells; gonad displaced; late larval arrest; pattern of transgene expression variant; protein aggregation variant; receptor mediated endocytosis defective; reduced brood size; transgene expression increased; transgene subcellular localization variant
WBGene00004076|W09B6.1|pod-2	50.11	9.69	5.17	OMIM:613933 [ACETYL-CoA CARBOXYLASE DEFICIENCY; ACACAD]	813-2054 aa	Seg; Ncoils		COG0439: Biotin carboxylase; COG0511: Biotin carboxyl carrier protein; COG4799: Acetyl-CoA carboxylase, carboxyltransferase component (subunits alpha and beta); KOG0368: Acetyl-CoA carboxylase; meNOG06310: Carboxylase	PF00289: Carbamoyl-phosphate synthase L chain, N-terminal domain; PF00364: Biotin-requiring enzyme; PF01039: Carboxyl transferase domain; PF02785: Biotin carboxylase C-terminal domain; PF02786: Carbamoyl-phosphate synthase L chain, ATP binding domain; PF07478: D-ala D-ala ligase C-terminus; PF08326: Acetyl-CoA carboxylase, central region	WBPhenotype: Clr; Emb; Mlt; Sck; Unc; larval growth variant; protein aggregation variant; transgene subcellular localization variant	NOT WBPheno: Bmd; Let; Ste; Variant; postembryonic development variant
WBGene00002998|ZK637.7|lin-9	2.43	0.47	5.17		642-644 aa	Seg; Ncoils		KOG1019: Retinoblastoma pathway protein LIN-9/chromatin-associated protein Aly; meNOG06254: Lin-9 homolog protein	PF06584: DIRP	WBPhenotype: Emo; Muv; RNAi enhanced; embryonic arrest; failure to hatch; male gonad development variant; rays missing; reduced brood size; somatic gonad development variant; somatic gonad morphology variant; spicule morphology variant	NOT WBPheno: Let; Variant; fertilization defective; postembryonic development variant
WBGene00006715|F40G9.3|ubc-20	134.01	25.98	5.16		199 aa			COG5078: Ubiquitin-protein ligase; KOG0418: Ubiquitin-protein ligase; meNOG08112: Ubiquitin protein	PF00179: Ubiquitin-conjugating enzyme	WBPhenotype: late larval arrest; reduced brood size	NOT WBPheno: Adl; Bmd; Egl D; Emb; Gro; Let; Lva; Lvl; Ste; Stp; Variant; anoxia hypersensitive; embryonic development variant; postembryonic development variant; protein aggregation variant; transgene subcellular localization variant
WBGene00012551|Y37D8A.11	352.18	68.81	5.12		406-499 aa	Seg		KOG3001: Dosage compensation regulatory complex/histone acetyltransferase complex, subunit MSL-3/MRG15/EAF3, and related CHROMO domain-containing proteins	PF11717: RNA binding activity-knot of a chromodomain		NOT WBPheno: Bmd; Emb; Gro; Let; Lva; Lvl; Ste; Stp; Variant; postembryonic development variant
WBGene00013149|Y53F4B.1	0.92	0.18	5.11		463 aa			COG0515: Serine/threonine protein kinase; KOG0192: Tyrosine kinase specific for activated (GTP-bound) p21cdc42Hs; meNOG06867: Mitogen-Activated protein kinase kinase kinase	PF00069: Protein kinase domain; PF07714: Protein tyrosine kinase		NOT WBPheno: Bmd; Emb; Let; Ste; Variant; postembryonic development variant
WBGene00012777|Y42A5A.2|lact-8	13.55	2.65	5.11		614 aa	SignalP; Tmhmm; Seg		COG1680: Beta-lactamase class C and other penicillin binding proteins; euNOG19960: Annotation not available	PF00144: Beta-lactamase		NOT WBPheno: Bmd; Emb; Ste; Variant
WBGene00000929|K07E3.3|dao-3	378.86	74.19	5.11		303 aa			COG0190: 5,10-methylene-tetrahydrofolate dehydrogenase/Methenyl tetrahydrofolate cyclohydrolase; KOG4230: C1-tetrahydrofolate synthase; meNOG25742: Dehydrogenase	PF00763: Tetrahydrofolate dehydrogenase/cyclohydrolase, catalytic domain; PF02882: Tetrahydrofolate dehydrogenase/cyclohydrolase, NAD(P)-binding domain	WBPhenotype: Age; Gro	NOT WBPheno: Bmd; Emb; Let; Lva; Lvl; Ste; Stp; Variant; postembryonic development variant
WBGene00000120|C01F6.5|aly-1	38.24	7.48	5.11		223 aa	Seg		KOG0533: RRM motif-containing protein; meNOG13336: Acts as chaperone and promotes the dimerization of transcription factors containing basic leucine zipper (bZIP) domains and thereby promotes transcriptional activation. Plays a role in mRNA processing and export. May function as scaffold that mediates interactions between proteins and/or RNA. Integral part of the THO/TREX complex that is recruite…			NOT WBPheno: Bmd; Emb; Gro; Let; Lva; Lvl; Ste; Stp; Variant; mRNA surveillance defective; postembryonic development variant
WBGene00003705|T27B7.4|nhr-115	5.97	1.17	5.1		322-391 aa		Walhout_TF	KOG3575: FOG: Hormone receptors	PF00105: Zinc finger, C4 type (two domains)		NOT WBPheno: Let
WBGene00008912|F17C8.7	145.36	28.56	5.09		296 aa	Seg					NOT WBPheno: Bmd; Emb; Let; Ste; Variant
WBGene00019770|M04F3.4	71.52	14.07	5.08		172 aa			KOG0037: Ca2+-binding protein, EF-Hand protein superfamily; meNOG07752: Calcium-Binding protein required for T-cell receptor-, Fas-, and glucocorticoid-induced cell death. May mediate Ca(2+)- regulated signals along the death	PF00036: EF hand		NOT WBPheno: Bmd; Emb; Gro; Let; Lva; Lvl; Ste; Stp; Variant; postembryonic development variant
WBGene00007457|C08F11.10	19	3.74	5.08		261 aa						NOT WBPheno: Let; Variant; postembryonic development variant
WBGene00003654|C45E1.1|nhr-64	18.02	3.55	5.08	OMIM:125850 [MATURITY-ONSET DIABETES OF THE YOUNG, TYPE 1; MODY1]; OMIM:125853 [DIABETES MELLITUS, NONINSULIN-DEPENDENT; NIDDM]; OMIM:606391 [MATURITY-ONSET DIABETES OF THE YOUNG; MODY]	344-369 aa	Seg	Walhout_TF	KOG4215: Hepatocyte nuclear factor 4 and similar steroid hormone receptors; meNOG06741: Nuclear factor 4	PF00104: Ligand-binding domain of nuclear hormone receptor; PF00105: Zinc finger, C4 type (two domains)		NOT WBPheno: Bmd; Emb; Let; SDS sensitive dauer; Ste; Variant; dauer development variant; transgene expression variant
WBGene00021371|Y37E11AR.4|nape-1	3.5	0.69	5.07		356 aa			COG2220: Predicted Zn-dependent hydrolases of the beta-lactamase fold; KOG3798: Predicted Zn-dependent hydrolase (beta-lactamase superfamily); meNOG07900: N-Acyl-Phosphatidylethanolamine-Hydrolyzing phospholipase D			NOT WBPheno: Let; Variant; postembryonic development variant
WBGene00018187|F38E9.5	0.86	0.17	5.06		333 aa	Seg; Ncoils		KOG1747: Protein tyrosine kinase 9/actin monomer-binding protein; meNOG06239: Twinfilin protein	PF00241: Cofilin/tropomyosin-type actin-binding protein		NOT WBPheno: Bmd; Emb; Gro; Let; Lva; Lvl; Ste; Stp; Variant; postembryonic development variant
WBGene00008402|D2013.2|wdfy-2	47.19	9.33	5.06		415 aa			COG2319: FOG: WD40 repeat; KOG1409: Uncharacterized conserved protein, contains WD40 repeats and FYVE domains; meNOG04393: WD repeat and FYVE domain containing protein	PF00400: WD domain, G-beta repeat; PF01363: FYVE zinc finger	WBPhenotype: coelomocyte uptake defective	NOT WBPheno: Bmd; Emb; Let; Q neuroblast lineage migration variant; Ste; Variant; accumulated cell corpses; cell polarity variant; postembryonic development variant
WBGene00013703|Y106G6D.7	3.18	0.63	5.05		948 aa	Seg		KOG4307: RNA binding protein RBM12/SWAN; meNOG13105: RNA binding protein	PF00076: RNA recognition motif. (a.k.a. RRM, RBD, or RNP domain)		NOT WBPheno: Bmd; Emb; Gro; Let; Lva; Lvl; Ste; Stp; Variant; postembryonic development variant
WBGene00000371|F26E4.9|cco-1	1042.72	206.57	5.05		132 aa			KOG3352: Cytochrome c oxidase, subunit Vb/COX4; meNOG19167: Cytochrome c oxidase	PF01215: Cytochrome c oxidase subunit Vb	WBPhenotype: reduced brood size
WBGene00003449|K07F5.3|msp-56	20.22	4.03	5.02		127 aa				PF00635: MSP (Major sperm protein) domain
WBGene00022518|ZC123.3	0.15	0	5	OMIM:176807 [PROSTATE CANCER]	1623 aa	Seg; Ncoils	Thomas+W_TF	KOG1146: Homeobox protein; meNOG07205: Zinc finger protein; meNOG13956: Protein 2 (Zinc finger homeodomain protein 2)	PF00046: Homeobox domain	WBPhenotype: Gro; Let; Lvl; Pvl; Rup; Ste; Stp; Unc; pattern of transgene expression variant; receptor mediated endocytosis defective; vulva morphology variant	NOT WBPheno: Bmd; Dyf; Emb; Lva; Variant; postembryonic development variant
WBGene00021757|Y50D7A.9	0.15	0	5	OMIM:256000 [LEIGH SYNDROME; LS]	285 aa	Seg		COG0217: Uncharacterized conserved protein; KOG2972: Uncharacterized conserved protein; meNOG17554: Coiled-Coil domain containing protein	PF01709: Domain of unknown function DUF28	WBPhenotype: fat content reduced	NOT WBPheno: Bmd; Emb; Gro; Lva; Lvl; Ste; Stp; Variant; fat content variant; postembryonic development variant
WBGene00021272|Y23H5B.1	0.15	0	5		173 aa	SignalP
WBGene00019437|K06A9.3	0.15	0	5		120 aa	Tmhmm; Seg					NOT WBPheno: Bmd; Emb; Gro; Lva; Lvl; Ste; Stp; Variant; postembryonic development variant
WBGene00019323|K02F2.3|teg-4	0.15	0	5		1220 aa			KOG1898: Splicing factor 3b, subunit 3; meNOG04937: Splicing factor 3b, subunit 3	PF03178: CPSF A subunit region	WBPhenotype: Emb; Led; Pvl; Sck; cell proliferation increased; excess intestinal cells; late embryonic arrest; protein aggregation variant; transgene expression increased; transgene subcellular localization variant	NOT WBPheno: Bmd; Ste; Variant; transgene expression reduced
WBGene00019154|H04M03.4|glf-1	0.15	0	5		476 aa	Ncoils		COG1232: Protoporphyrinogen oxidase; euNOG04482: Udp-Galactopyranose mutase; meNOG25513: Annotation not available		WBPhenotype: Bli; Dar; Dpy; Emb; Let; Lvl; Skd; Ste; bleach hypersensitive; body constriction; cuticle carbohydrate surface variant; cuticle fragile; cuticle integrity variant; cuticle physiology variant; drug hypersensitive; ivermectin response variant; levamisole hypersensitive; organism hypersensitive dessication; organism starvation hypersensitive; small
WBGene00019139|F59H6.9|bath-1	0.5	0.1	5		302 aa			NOG150137: BTB and MATH domain containing family member bath protein; euNOG13703: BTB and MATH domain containing family member bath protein	PF00651: BTB/POZ domain; PF00917: MATH domain	WBPhenotype: Emb	NOT WBPheno: Bmd; Gro; Let; Lva; Lvl; Ste; Stp; Variant; glp; postembryonic development variant
WBGene00018632|F49D11.9|tag-296	70.3	14.05	5		281 aa			KOG1963: WD40 repeat protein; KOG4189: Uncharacterized conserved protein; meNOG15627: Glycolipid transfer protein domain-containing protein	PF08718: Glycolipid transfer protein (GLTP)		NOT WBPheno: Emb; Gro; Lva; Lvl; Ste; Stp; Variant; postembryonic development variant
WBGene00016502|C37C3.10	0.15	0	5		123 aa	Seg					NOT WBPheno: Bmd; Emb; Gro; Let; Lva; Lvl; Ste; Stp; Variant; postembryonic development variant
WBGene00016160|C27D6.1	0.15	0	5		782 aa	Seg; Ncoils		NOG74677: Coiled coil protein; euNOG05106: Coiled coil protein; meNOG08883: Coiled coil protein			NOT WBPheno: Bmd; Emb; Gro; Lva; Lvl; Ste; Stp; Variant; postembryonic development variant
WBGene00015478|C05D10.2	0.15	0	5		86-470 aa	Seg		COG0515: Serine/threonine protein kinase; KOG0660: Mitogen-activated protein kinase; meNOG04102: Mitogen-Activated protein kinase 15 (EC 2.7.11.24) Extracellular signal-regulated kinase	PF00069: Protein kinase domain; PF07714: Protein tyrosine kinase	WBPhenotype: Emb; Lva; reduced brood size	NOT WBPheno: Bmd; Gro; Let; Lvl; Ste; Stp; Variant; embryonic development variant; postembryonic development variant; protein aggregation variant; transgene subcellular localization variant
WBGene00015266|BE0003N10.1	0.15	0	5		738 aa	Seg		COG1185: Polyribonucleotide nucleotidyltransferase (polynucleotide phosphorylase); KOG1067: Predicted RNA-binding polyribonucleotide nucleotidyltransferase; meNOG04066: Polyribonucleotide nucleotidyltransferase	PF01138: 3' exoribonuclease family, domain 1; PF03725: 3' exoribonuclease family, domain 2; PF03726: Polyribonucleotide nucleotidyltransferase, RNA binding domain		NOT WBPheno: Bmd; Emb; Ste; Variant
WBGene00012931|Y47D3A.20	0.15	0	5		121 aa	Seg					NOT WBPheno: Emb; Gro; Let; Lva; Lvl; Ste; Stp; Variant; postembryonic development variant
WBGene00011749|T13F2.12	0.15	0	5		107 aa						NOT WBPheno: Bmd; Emb; Let; Ste; Variant
WBGene00011646|T09B9.5	0.15	0	5		363 aa	Tmhmm; Seg					NOT WBPheno: Bmd; Emb; Gro; Lva; Lvl; Ste; Stp; Variant; postembryonic development variant
WBGene00007946|C35A5.2|ugt-33	0.15	0	5	OMIM:143500 [GILBERT SYNDROME]; OMIM:218800 [CRIGLER-NAJJAR SYNDROME]; OMIM:237900 [HYPERBILIRUBINEMIA, TRANSIENT FAMILIAL NEONATAL]; OMIM:601816 [BILIRUBIN, SERUM LEVEL OF, QUANTITATIVE TRAIT LOCUS 1; BILIQTL1]; OMIM:606785 [CRIGLER-NAJJAR SYNDROME, TYPE II]; OMIM:612560 [BONE MINERAL DENSITY QUANTITATIVE TRAIT LOCUS 12; BMND12]	522 aa	SignalP; Tmhmm; Seg		KOG1192: UDP-glucuronosyl and UDP-glucosyl transferase; meNOG12359: Udp-Galactose ceramide galactosyltransferase	PF04101: Glycosyltransferase family 28 C-terminal domain		NOT WBPheno: Bmd; Emb; Gro; Lva; Lvl; Ste; Stp; Variant; postembryonic development variant
WBGene00007363|C06B3.4|stdh-1	0.3	0.06	5		314 aa	SignalP; Tmhmm		COG0300: Short-chain dehydrogenases of various substrate specificities; KOG1014: 17 beta-hydroxysteroid dehydrogenase type 3, HSD17B3; meNOG07925: Dehydrogenase	PF00106: short chain dehydrogenase		NOT WBPheno: Let; Variant; postembryonic development variant
WBGene00007207|B0564.7	0.15	0	5		603 aa			euNOG06007: Cell cycle progression protein; meNOG12529: Cell cycle progression protein			NOT WBPheno: Bmd; Emb; Ste; Variant
WBGene00007166|B0391.11|fbxa-152	0.15	0	5		378 aa				PF00646: F-box domain; PF01827: FTH domain		NOT WBPheno: Let; Variant; postembryonic development variant
WBGene00004014|Y37E3.9|phb-1	4509.09	902.27	5	OMIM:114480 [BREAST CANCER]	275 aa	Seg; Ncoils		COG0330: Membrane protease subunits, stomatin/prohibitin homologs; KOG3083: Prohibitin; meNOG05487: Prohibitin protein	PF01145: SPFH domain / Band 7 family	WBPhenotype: Emb; Let; Ste
WBGene00003707|F16B4.12|nhr-117	0.15	0	5		435-477 aa	Seg	Walhout_TF	KOG3575: FOG: Hormone receptors	PF00105: Zinc finger, C4 type (two domains)		NOT WBPheno: Bmd; Emb; Let; Ste; Variant; postembryonic development variant
WBGene00002368|K08E7.3|let-99	0.15	0	5		698 aa	Seg			PF00610: Domain found in Dishevelled, Egl-10, and Pleckstrin (DEP)	WBPhenotype: Emb
WBGene00001938|F22B3.1|his-64	0.15	0	5		103 aa	Seg		COG2036: Histones H3 and H4; KOG3467: Histone H4; meNOG20073: Histone H4 protein	PF00125: Core histone H2A/H2B/H3/H4; PF00808: Histone-like transcription factor (CBF/NF-Y) and archaeal histone; PF02969: TATA box binding protein associated factor (TAF)	WBPhenotype: Emb; Gro
WBGene00001879|F45F2.3|his-5	0.15	0	5		103 aa	Seg		COG2036: Histones H3 and H4; KOG3467: Histone H4; meNOG20073: Histone H4 protein	PF00125: Core histone H2A/H2B/H3/H4; PF00808: Histone-like transcription factor (CBF/NF-Y) and archaeal histone; PF02969: TATA box binding protein associated factor (TAF)	WBPhenotype: Emb; Lva; Lvl; Pvl; Ste
WBGene00001554|M04G12.3|gcy-34	0.15	0	5		686 aa	Seg; Ncoils		COG2114: Adenylate cyclase, family 3 (some proteins contain HAMP domain); KOG4171: Adenylate/guanylate kinase; meNOG05207: Guanylate cyclase	PF00211: Adenylate and Guanylate cyclase catalytic domain; PF07701: Heme NO binding associated		NOT WBPheno: Bmd; Emb; Let; Ste; Variant; postembryonic development variant
WBGene00007365|C06B3.6	30.06	6.03	4.99	OMIM:132810 [EPOXIDE HYDROLASE 1, MICROSOMAL; EPHX1]; OMIM:189800 [PREECLAMPSIA/ECLAMPSIA 1; PEE1]; OMIM:607748 [HYPERCHOLANEMIA, FAMILIAL; FHCA]	220 aa	Seg; Ncoils					NOT WBPheno: Bmd; Emb; Gro; Let; Lva; Lvl; Ste; Stp; Variant; postembryonic development variant
WBGene00022347|Y82E9BR.14	5.28	1.06	4.98		231-304 aa			KOG3221: Glycolipid transfer protein; meNOG11083: Accelerates the intermembrane transfer of various glycolipids. Catalyzes the transfer of various glycosphingolipids between membranes but does not catalyze the transfer of phospholipids. May be involved in the intracellular translocation of protein	PF08718: Glycolipid transfer protein (GLTP)		NOT WBPheno: Bmd; Emb; Ste; Variant
WBGene00016435|C35B1.5	1184.98	239.13	4.96		151 aa			KOG2501: Thioredoxin, nucleoredoxin and related proteins; meNOG18341: Protein involved in cell redox homeostasis	PF00085: Thioredoxin; PF02630: SCO1/SenC; PF08534: Redoxin		NOT WBPheno: Bmd; Emb; Let; Ste; Variant; postembryonic development variant
WBGene00014022|ZK637.2	180.65	36.46	4.95		143 aa			KOG3377: Uncharacterized conserved protein; meNOG18849: Annotation not available			NOT WBPheno: Bmd; Emb; Gro; Let; Lva; Lvl; Ste; Stp; Variant; embryonic development variant; postembryonic development variant
WBGene00007030|Y111B2A.11|epc-1	3.96	0.8	4.95		795 aa	Seg; Ncoils		KOG2261: Polycomb enhancer protein, EPC; meNOG06795: Component of the NuA4 histone acetyltransferase (HAT) complex which is involved in transcriptional activation of select genes principally by acetylation of nucleosomal histone H4 and H2A. This modification may both alter nucleosome - DNA interactions and promote interaction of the modified histones with other proteins which positively regulate …	PF10513: Enhancer of polycomb-like	WBPhenotype: Emb; Lva; Lvl; Muv; Sck; Stp; small; vulva development variant; vulval cell lineage variant	NOT WBPheno: Bmd; Ste; Variant; embryonic development variant; organism UV hypersensitive; postembryonic development variant
WBGene00011802|T16G1.9	9.13	1.85	4.94	OMIM:114480 [BREAST CANCER]	945 aa	Seg		NOG150407: Annotation not available	PF00023: Ankyrin repeat		NOT WBPheno: Bmd; Emb; Gro; Let; Lva; Lvl; Ste; Stp; Variant; postembryonic development variant
WBGene00006982|Y48A6A.1|zig-5	5.58	1.13	4.94		260 aa	SignalP			PF07679: Immunoglobulin I-set domain	WBPhenotype: Emb; Lva	NOT WBPheno: Bmd; Gro; Let; Lvl; Ste; Stp; Variant; anchor cell invasion variant; embryonic development variant; postembryonic development variant
WBGene00003438|F58A6.8|msp-45	85.04	17.23	4.94		127 aa				PF00635: MSP (Major sperm protein) domain
WBGene00007308|C04G2.9	3257.84	661.15	4.93		371 aa	Seg			PF12150: Cytosolic motility protein		NOT WBPheno: Bmd; Emb; Let; Ste; Variant; postembryonic development variant
WBGene00016159|C27A12.9	9.28	1.89	4.91		883 aa	SignalP; Tmhmm; Seg		COG1524: Uncharacterized proteins of the AP superfamily; KOG2126: Glycosylphosphatidylinositol anchor synthesis protein; meNOG04215: GPI ethanolamine phosphate transferase 3	PF01663: Type I phosphodiesterase / nucleotide pyrophosphatase	WBPhenotype: body wall muscle myosin organization defective	NOT WBPheno: Bmd; Emb; Gro; Let; Lva; Lvl; Ste; Stp; Variant; postembryonic development variant
WBGene00015921|C17H11.1	0.49	0.1	4.9		475 aa	Tmhmm; Seg		KOG3656: FOG: 7 transmembrane receptor; meNOG20920: Probable G-protein coupled receptor	PF00001: 7 transmembrane receptor (rhodopsin family)		NOT WBPheno: Bmd; Emb; Gro; Lva; Lvl; Ste; Stp; Variant; postembryonic development variant
WBGene00004929|AC7.2|soc-2	0.49	0.1	4.9	OMIM:607721 [NOONAN SYNDROME-LIKE DISORDER WITH LOOSE ANAGEN HAIR; NSLH]	558-559 aa	Seg		COG4886: Leucine-rich repeat (LRR) protein; KOG0619: FOG: Leucine rich repeat; meNOG04000: Leucine-Rich repeat protein SHOC-2	PF00560: Leucine Rich Repeat
WBGene00012980|Y48B6A.6	23.05	4.71	4.89		179-687 aa	Seg; Ncoils		KOG0041: Predicted Ca2+-binding protein, EF-Hand protein superfamily; meNOG18520: Ef-Hand domain-containing protein	PF00036: EF hand; PF10591: Secreted protein acidic and rich in cysteine Ca binding region		NOT WBPheno: Bmd; Emb; Gro; Let; Lva; Lvl; Ste; Stp; Variant; postembryonic development variant
WBGene00009743|F45H11.1|sptf-1	3.47	0.71	4.89	OMIM:613849 [OSTEOGENESIS IMPERFECTA, TYPE XI]	295-298 aa	Seg	Thomas+W_TF	KOG1721: FOG: Zn-finger; meNOG10475: Transcription factor		WBPhenotype: Dyf; Let; Lvl; Ste	NOT WBPheno: Bmd; Emb; Variant; postembryonic development variant
WBGene00004505|F56H1.4|rpt-5	778.56	159.22	4.89		430 aa	Seg		COG1222: ATP-dependent 26S proteasome regulatory subunit; KOG0652: 26S proteasome regulatory complex, ATPase RPT5; meNOG04858: 26S protease regulatory subunit 6A (Proteasome 26S subunit ATPase 3)	PF00004: ATPase family associated with various cellular activities (AAA); PF05496: Holliday junction DNA helicase ruvB N-terminus; PF07724: AAA domain (Cdc48 subfamily); PF07728: AAA domain (dynein-related subfamily)	WBPhenotype: Age; Emb; Let; Lvl; Ocs; Ste; dead eggs laid; protein aggregation variant; transgene subcellular localization variant
WBGene00004443|B0513.3|rpl-29	35.88	7.34	4.89		31-62 aa			KOG3504: 60S ribosomal protein L29; meNOG21301: Ribosomal protein L29	PF01779: Ribosomal L29e protein family	WBPhenotype: Gro; Let; Ste; sterile F1	NOT WBPheno: Emb; Lva; Lvl; Stp; Variant; postembryonic development variant
WBGene00020466|T12F5.1	14.79	3.03	4.88		249 aa	Seg; Ncoils				WBPhenotype: Bmd; Emb; Him; Let; Lva; Pvl; Sck; Ste; Stp; reduced brood size	NOT WBPheno: Gro; Lvl; Variant; postembryonic development variant
WBGene00009987|F53F4.3	831.09	170.35	4.88		229 aa			COG5244: Dynactin complex subunit involved in mitotic spindle partitioning in anaphase B; KOG3206: Alpha-tubulin folding cofactor B; meNOG12410: Tubulin folding cofactor b	PF01302: CAP-Gly domain		NOT WBPheno: Bmd; Emb; Let; Ste; Variant; postembryonic development variant
WBGene00017691|F22A3.6|ilys-5	7.55	1.55	4.87		58-139 aa	SignalP		NOG86990: Lysozyme protein; euNOG16700: Lysozyme protein; meNOG25907: Lysozyme protein	PF05497: Destabilase	WBPhenotype: Emb	NOT WBPheno: Bmd; Let; Ste; Variant; postembryonic development variant
WBGene00007167|B0393.2|rbg-3	1.8	0.37	4.86		585 aa	Seg; Ncoils		KOG1091: Ypt/Rab-specific GTPase-activating protein GYP6; meNOG06407: TBC1 domain family member protein	PF00566: TBC domain	WBPhenotype: fat content reduced	NOT WBPheno: Bmd; Dyf; Emb; Gro; Let; Lva; Lvl; Ste; Stp; Variant; embryonic development variant; postembryonic development variant
WBGene00000408|Y39G10AL.3|cdk-7	69.57	14.34	4.85		330 aa			COG0515: Serine/threonine protein kinase; KOG0659: Cdk activating kinase (CAK)/RNA polymerase II transcription initiation/nucleotide excision repair factor TFIIH/TFIIK, kinase subunit CDK7; meNOG05504: Cell division protein kinase 7 (EC 2.7.11.22) 39	PF00069: Protein kinase domain; PF07714: Protein tyrosine kinase	WBPhenotype: Emb	NOT WBPheno: Bmd; Ste; Variant
WBGene00044109|K02E11.10	7.97	1.65	4.83		360 aa	SignalP; Tmhmm; Seg					NOT WBPheno: Let
WBGene00018639|F49E10.1|tbc-16	0.82	0.17	4.82		744 aa	Seg		COG5210: GTPase-activating protein; KOG2224: Uncharacterized conserved protein, contains TBC domain; meNOG04772: TBC1 domain family member protein	PF00566: TBC domain		NOT WBPheno: Bmd; Emb; Gro; Let; Lva; Lvl; Ste; Stp; Variant; postembryonic development variant
WBGene00017756|F23F12.12	0.77	0.16	4.81		85 aa	SignalP; Tmhmm; Seg					NOT WBPheno: Bmd; Emb; Ste; Variant
WBGene00012097|T27E9.7|abcf-2	15.61	3.25	4.8		622 aa	Seg; Ncoils		COG0488: ATPase components of ABC transporters with duplicated ATPase domains; KOG0927: Predicted transporter (ABC superfamily); meNOG05324: Atp-Binding cassette, sub-family F protein	PF00005: ABC transporter		NOT WBPheno: Bmd; Emb; Gro; Let; Lva; Lvl; Ste; Stp; Variant; postembryonic development variant
WBGene00011434|T04D3.5	262.08	54.68	4.79		300 aa					WBPhenotype: Emb; Lva	NOT WBPheno: Bmd; Gro; Lvl; Ste; Stp; Variant; postembryonic development variant
WBGene00008708|F11E6.4	28.64	6	4.77		129 aa	SignalP					NOT WBPheno: Let; Variant; postembryonic development variant
WBGene00004462|F57B9.10|rpn-6.1	209.32	43.86	4.77		420-438 aa	Seg		COG5159: 26S proteasome regulatory complex component; KOG1463: 26S proteasome regulatory complex, subunit RPN6/PSMD11; meNOG04862: 26S proteasome non-ATPase regulatory subunit 11	PF01399: PCI domain	WBPhenotype: Adl; Age; Clr; Emb; Let; Lvl; Ste; protein aggregation variant; transgene expression increased; transgene subcellular localization variant	NOT WBPheno: Variant; postembryonic development variant
WBGene00003975|T28D6.9|pen-2	9.83	2.06	4.77	OMIM:613736 [ACNE INVERSA, FAMILIAL, 2; ACNINV2]	101 aa	Tmhmm		KOG3402: Predicted membrane protein; meNOG19756: Gamma-Secretase	PF10251: Presenilin enhancer-2 subunit of gamma secretase	WBPhenotype: Aph; Egl D; Mel; ventral enclosure variant	NOT WBPheno: Bmd; Emb; Let; Ste; Variant; postembryonic development variant
WBGene00022464|Y110A7A.19	38.98	8.19	4.76		660 aa			KOG4422: Uncharacterized conserved protein; meNOG06631: Pentatricopeptide repeat		WBPhenotype: Emb; reduced brood size	NOT WBPheno: Bmd; Ste; Variant
WBGene00001229|D2013.7|eif-3.F	143.48	30.17	4.76		294 aa			COG1310: Predicted metal-dependent protease of the PAD1/JAB1 superfamily; KOG2975: Translation initiation factor 3, subunit f (eIF-3f); meNOG12134: Eukaryotic translation initiation factor 3, subunit 5 (epsilon)	PF01398: Mov34/MPN/PAD-1 family	WBPhenotype: Age; Bmd; Dpy; Emb; Gro; Lva; Pvl; Stp; pattern of transgene expression variant; protein subcellular localization variant; receptor mediated endocytosis defective; reduced brood size; transgene expression increased; transgene expression variant	NOT WBPheno: Ste; Variant
WBGene00000086|C02H7.3|aex-3	1.57	0.33	4.76		1408-1409 aa	Seg; Ncoils		KOG3570: MAPK-activating protein DENN; meNOG04083: Map-Kinase	PF02141: DENN (AEX-3) domain; PF03455: dDENN domain; PF03456: uDENN domain	WBPhenotype: Age; Exp; Ric; aBoc	NOT WBPheno: Bmd; Emb; Gro; Lva; Lvl; Ste; Stp; Variant; ethosuximide resistant; postembryonic development variant; protein subcellular localization variant; transgene expression reduced; trimethadione resistant
WBGene00019580|K09E10.2|oac-58	0.19	0.04	4.75		695 aa	Tmhmm; Seg		COG1835: Predicted acyltransferases; euNOG04361: Protein oac	PF01757: Acyltransferase family		NOT WBPheno: Let; Variant; postembryonic development variant
WBGene00013431|Y66D12A.5	0.19	0.04	4.75		729 aa	Seg					NOT WBPheno: Bmd; Emb; Ste; Variant
WBGene00006896|F59F3.1|ver-3	0.19	0.04	4.75	OMIM:153100 [LYMPHEDEMA, HEREDITARY, IA]; OMIM:602089 [HEMANGIOMA, CAPILLARY INFANTILE]	1227 aa	SignalP; Tmhmm; Seg		COG0515: Serine/threonine protein kinase; KOG0200: Fibroblast/platelet-derived growth factor receptor and related receptor tyrosine kinases; meNOG06103: Growth factor	PF00047: Immunoglobulin domain; PF00069: Protein kinase domain; PF07679: Immunoglobulin I-set domain; PF07686: Immunoglobulin V-set domain; PF07714: Protein tyrosine kinase		NOT WBPheno: Bmd; Emb; Gro; Let; Lva; Lvl; Ste; Stp; Variant; anchor cell invasion variant; postembryonic development variant
WBGene00004492|F28D1.7|rps-23	13732.1	2888.26	4.75		143 aa			COG0048: Ribosomal protein S12; KOG1749: 40S ribosomal protein S23; meNOG08705: Ribosomal protein S23	PF00164: Ribosomal protein S12	WBPhenotype: Age; Emb; Lva; Mlt; Pvl; Sck; Ste; paraquat resistant; pathogen resistance increased
WBGene00002000|F58D5.1|hrp-2	0.19	0.04	4.75		108-611 aa	Seg		COG0724: RNA-binding proteins (RRM domain); KOG0117: Heterogeneous nuclear ribonucleoprotein R (RRM superfamily); meNOG04873: Heterogeneous nuclear ribonucleoprotein	PF00076: RNA recognition motif. (a.k.a. RRM, RBD, or RNP domain)	WBPhenotype: Emb; Pvl; Sck; Ste; oogenesis variant	NOT WBPheno: Bmd; Variant
WBGene00001815|W09D6.6|hmt-1	0.19	0.04	4.75		801 aa	Tmhmm; Seg		COG5265: ABC-type transport system involved in Fe-S cluster assembly, permease and ATPase components; KOG0056: Heavy metal exporter HMT1, ABC superfamily; meNOG05397: Atp-Binding cassette sub-family B member 6, mitochondrial protein	PF00005: ABC transporter; PF00664: ABC transporter transmembrane region	WBPhenotype: cadmium hypersensitive; intestinal cell morphology variant	NOT WBPheno: Bmd; Emb; Let; Ste; Variant; embryonic development variant; postembryonic development variant
WBGene00006040|T28H11.6|ssp-11	125.21	26.44	4.74		109 aa	Seg			PF00635: MSP (Major sperm protein) domain
WBGene00044921|F53C11.9	0.52	0.11	4.73		80 aa	SignalP		NOG131087: Annotation not available; euNOG21011: Annotation not available; meNOG27686: Annotation not available	PF01826: Trypsin Inhibitor like cysteine rich domain
WBGene00012522|Y32B12B.2	124.34	26.31	4.73		282-812 aa	Seg; Ncoils					NOT WBPheno: Bmd; Emb; Gro; Lva; Lvl; Ste; Stp; Variant; postembryonic development variant
WBGene00009087|F23D12.3	1.04	0.22	4.73		203 aa						NOT WBPheno: Bmd; Emb; Gro; Lva; Lvl; Ste; Stp; Variant; postembryonic development variant
WBGene00077685|C04F12.12	6.77	1.44	4.7		137 aa
WBGene00022381|Y94H6A.9|ubxn-2	153.73	32.7	4.7		193-301 aa	Seg; Ncoils		KOG2086: Protein tyrosine phosphatase SHP1/Cofactor for p97 ATPase-mediated vesicle membrane fusion; meNOG08438: Cofactor (p47)	PF00789: UBX domain; PF08059: SEP domain	WBPhenotype: Let; Ste	NOT WBPheno: Bmd; Emb; Variant; endoplasmic reticulum morphology variant; postembryonic development variant
WBGene00011134|R08A2.3	0.61	0.13	4.69		107 aa						NOT WBPheno: Bmd; Emb; Let; Ste; Variant; postembryonic development variant
WBGene00000377|T05C12.7|cct-1	9162.92	1957.68	4.68		549 aa	Seg		COG0459: Chaperonin GroEL (HSP60 family); KOG0360: Chaperonin complex component, TCP-1 alpha subunit (CCT1); meNOG05186: T-Complex protein	PF00118: TCP-1/cpn60 chaperonin family	WBPhenotype: Clr; Emb; Gro; Let; Lva; Pvl; Sck; Ste; distal tip cell migration variant; pattern of transgene expression variant; protein aggregation variant; receptor mediated endocytosis defective; transgene subcellular localization variant
WBGene00044559|ZK380.5	0.14	0	4.67		136 aa	Seg; Ncoils
WBGene00022304|Y76G2A.1	0.14	0	4.67		137 aa			KOG0106: Alternative splicing factor SRp55/B52/SRp75 (RRM superfamily)			NOT WBPheno: Bmd; Emb; Let; Ste; Variant; postembryonic development variant
WBGene00015503|C06A5.5	0.14	0	4.67		137 aa			KOG0106: Alternative splicing factor SRp55/B52/SRp75 (RRM superfamily)			NOT WBPheno: Bmd; Emb; Ste; Variant
WBGene00013623|Y102A5C.19|fbxa-90	0.98	0.21	4.67		301 aa				PF00646: F-box domain; PF01827: FTH domain		NOT WBPheno: Bmd; Emb; Gro; Let; Lva; Lvl; Ste; Stp; Variant; postembryonic development variant
WBGene00013306|Y57G11C.8	0.56	0.12	4.67		210 aa	SignalP; Seg
WBGene00012163|VZK822L.2	0.14	0	4.67		83 aa	SignalP; Tmhmm
WBGene00004095|F52C9.8|pqe-1	38.42	8.23	4.67		440-1647 aa	Seg; Ncoils		COG0847: DNA polymerase III, epsilon subunit and related 3-5 exonucleases; KOG2248: 3-5 exonuclease; meNOG06081: Transcription elongation factor B polypeptide 3 binding protein 1	PF00929: Exonuclease		NOT WBPheno: Bmd; Emb; Gro; Let; Lva; Lvl; Ste; Stp; Variant; embryonic development variant; postembryonic development variant
WBGene00003002|C03B8.4|lin-13	28.93	6.2	4.67	OMIM:300848 [MENTAL RETARDATION, X-LINKED 89; MRX89]	2248 aa	Seg; Ncoils	Thomas+W_TF	KOG1721: FOG: Zn-finger		WBPhenotype: Bmd; Cod; Evl; Lva; Muv; Pvl; Ste; protein subcellular localization variant; sterile F1; transgene expression increased; transgene expression reduced
WBGene00001005|T26A5.9|dlc-1	537.09	115.02	4.67		89 aa			KOG3430: Dynein light chain type 1; meNOG20124: Dynein, light chain protein		WBPhenotype: Bmd; DNA synthesis variant; Dpy; Emb; Gro; Let; Lvl; Pvl; Ric; Rup; Ste; Tum; Unc; aneuploidy; antibody staining reduced; cell division variant; mRNA levels reduced; nuclear appearance variant; nuclear positioning variant; nuclei enlarged; pattern of transgene expression variant; receptor mediated endocytosis defective; reduced brood size; synapsis defective; transgene expression red…
WBGene00000376|ZC518.3|ccr-4	123.22	26.38	4.67		597-677 aa	Seg	Gupta_TF	COG4886: Leucine-rich repeat (LRR) protein; COG5239: mRNA deadenylase, exonuclease subunit and related nucleases; KOG0620: Glucose-repressible alcohol dehydrogenase transcriptional effector CCR4 and related proteins; meNOG05732: Transcript protein	PF00560: Leucine Rich Repeat; PF03372: Endonuclease/Exonuclease/phosphatase family	WBPhenotype: Age; Emb; Rol; Sck; Ste; Unc; age associated fluorescence increased; nicotine hypersensitive; small; transgene expression increased	NOT WBPheno: Adl; Bmd; Gro; Let; Lva; Lvl; Stp; Variant; phasmid socket absent; postembryonic development variant
WBGene00021857|Y54F10BM.2|iffb-1	10.06	2.16	4.66		1074 aa	Seg; Ncoils		COG0532: Translation initiation factor 2 (IF-2; GTPase); KOG1144: Translation initiation factor 5B (eIF-5B); meNOG05610: Translation initiation protein	PF00009: Elongation factor Tu GTP binding domain; PF03029: Conserved hypothetical ATP binding protein; PF03144: Elongation factor Tu domain 2; PF11987: Translation-initiation factor 2	WBPhenotype: Emb; Lva; Ste	NOT WBPheno: Bmd; Variant
WBGene00004435|B0336.10|rpl-23	3718.69	798.35	4.66		140 aa			COG0093: Ribosomal protein L14; KOG0901: 60S ribosomal protein L14/L17/L23; meNOG18368: Ribosomal protein L23		WBPhenotype: Emb; Lva; Mlt; Sck; Ste; protein aggregation variant; transgene subcellular localization variant
WBGene00004298|W06D4.6|rad-54	6.81	1.46	4.66	OMIM:114480 [BREAST CANCER]; OMIM:605027 [LYMPHOMA, NON-HODGKIN, FAMILIAL]	818 aa	Seg; Ncoils		COG0553: Superfamily II DNA/RNA helicases, SNF2 family; KOG0390: DNA repair protein, SNF2 family; meNOG05374: DNA repair and protein	PF00176: SNF2 family N-terminal domain; PF00271: Helicase conserved C-terminal domain; PF11496: Class II histone deacetylase complex subunits 2 and 3	WBPhenotype: Let; Mel; Ste; apoptosis increased; cell stress response variant	NOT WBPheno: Bmd; Emb; Gro; Lva; Lvl; Stp; Variant; meiosis variant; meiotic DNA double strand break formation variant; organism UV hypersensitive; postembryonic development variant
WBGene00010480|K01G5.9	9.54	2.05	4.65		331 aa			COG1446: Asparaginase; KOG1592: Asparaginase; meNOG08658: Asparaginase	PF01112: Asparaginase		NOT WBPheno: Bmd; Emb; Gro; Let; Lva; Lvl; Ste; Stp; Variant; postembryonic development variant
WBGene00010337|F59F4.2	370.44	79.63	4.65		65 aa	Tmhmm		KOG3491: Predicted membrane protein; meNOG21317: Associated protein			NOT WBPheno: Bmd; Emb; Gro; Let; Lva; Lvl; Ste; Stp; Variant; postembryonic development variant
WBGene00008480|E04D5.1	668.32	144.22	4.63		177-570 aa	Seg		COG5354: Uncharacterized protein, contains Trp-Asp (WD) repeat; KOG2315: Predicted translation initiation factor related to eIF-3a; meNOG04420: Functions in the early steps of protein synthesis of a small number of specific mRNAs. Acts by directing the binding of methionyl-tRNAi to 40S ribosomal subunits. In contrast to the eIF- 2 complex, it binds methionyl-tRNAi to 40 S subunits in a codon- dep…	PF08662: Eukaryotic translation initiation factor eIF2A
WBGene00016987|CC8.2	6.14	1.33	4.62	OMIM:125853 [DIABETES MELLITUS, NONINSULIN-DEPENDENT; NIDDM]; OMIM:604367 [LIPODYSTROPHY, FAMILIAL PARTIAL, TYPE 3; FPLD3]	295-318 aa	Seg		KOG3986: Protein phosphatase, regulatory subunit PPP1R3C/D; meNOG14850: Protein phosphatase 1, regulatory subunit 3D	PF03370: Putative phosphatase regulatory subunit		NOT WBPheno: Bmd; Emb; Gro; Let; Lva; Lvl; Ste; Stp; Variant; postembryonic development variant; protein aggregation variant; transgene subcellular localization variant
WBGene00008669|F11A3.1|acs-14	35.02	7.6	4.61		544 aa			COG0318: Acyl-CoA synthetases (AMP-forming)/AMP-acid ligases II; KOG1176: Acyl-CoA synthetase; meNOG07047: Protein involved in phenylpropanoid biosynthesis	PF00501: AMP-binding enzyme		NOT WBPheno: Bmd; Emb; Let; Ste; Variant; postembryonic development variant
WBGene00004266|C39F7.4|rab-1	16.23	3.52	4.61		205 aa	Seg		COG1100: GTPase SAR1 and related small G proteins; KOG0084: GTPase Rab1/YPT1, small G protein superfamily, and related GTP-binding proteins; meNOG04295: Ras-Related protein Rab	PF00009: Elongation factor Tu GTP binding domain; PF00025: ADP-ribosylation factor family; PF00071: Ras family; PF04670: Gtr1/RagA G protein conserved region; PF08477: Miro-like protein; PF09439: Signal recognition particle receptor beta subunit	WBPhenotype: Adl; Emb; Let; Lva; Lvl; Mlt; Prl; Ste; oogenesis variant; pattern of transgene expression variant; protein aggregation variant; receptor mediated endocytosis defective; transgene expression reduced; transgene subcellular localization variant	NOT WBPheno: endoplasmic reticulum morphology variant
WBGene00020646|T21D11.1	0.23	0.05	4.6		279 aa	SignalP; Seg		KOG1565: Gelatinase A and related matrix metalloproteases	PF00413: Matrixin		NOT WBPheno: Bmd; Emb; Gro; Let; Lva; Lvl; Ste; Stp; Variant; embryonic development variant; postembryonic development variant
WBGene00016746|C48B6.10	1.84	0.4	4.6		61 aa	Tmhmm; Seg					NOT WBPheno: Bmd; Emb; Ste; Variant
WBGene00006379|T23D8.9|sys-1	3.82	0.83	4.6		239-811 aa	Seg				WBPhenotype: Bmd; Emb; Gro; Led; Lva; Pvl; Rup; Stp; Unc; distal tip cell development variant; late embryonic arrest; multiple anchor cells	NOT WBPheno: Ste; Variant
WBGene00001898|M163.3|his-24	272.05	59.14	4.6		208 aa	Seg		KOG4012: Histone H1; meNOG22612: Histones H1 are necessary for the condensation of nucleosome chains into higher order protein	PF00538: linker histone H1 and H5 family	WBPhenotype: Emb; Ste; germ cell development variant; germline transgene silencing variant; glp	NOT WBPheno: male germline proliferation variant; somatic transgene silencing variant
WBGene00018719|F52H2.7	0.78	0.17	4.59		875 aa			KOG1031: Predicted Ca2+-dependent phospholipid-binding protein; meNOG06414: Annotation not available	PF00168: C2 domain	WBPhenotype: Emb	NOT WBPheno: Gro; Let; Lva; Lvl; Ste; Stp; Variant; postembryonic development variant
WBGene00006924|F56D12.5|vig-1	1786.01	389.95	4.58		165-378 aa	Tmhmm; Seg		KOG2945: Predicted RNA-binding protein; meNOG08470: Plasminogen activator inhibitor 1 RNA-binding protein (PAI1 RNA- binding protein 1)	PF04774: Hyaluronan / mRNA binding family	WBPhenotype: Emb; transgene expression variant	NOT WBPheno: Bmd; Gro; Let; Lva; Lvl; Rde; Ste; Stp; Variant; alae variant; postembryonic development variant; protein aggregation variant; transgene subcellular localization variant; vulva development variant
WBGene00018362|F42G9.1	5.88	1.29	4.56		469-491 aa	Seg; Ncoils		COG0631: Serine/threonine protein phosphatase; KOG0699: Serine/threonine protein phosphatase; meNOG04727: Protein phosphatase 2C isoform gamma (EC 3.1.3.16) Protein phosphatase	PF00481: Protein phosphatase 2C		NOT WBPheno: Bmd; Emb; Gro; Let; Lva; Lvl; Ste; Stp; Variant; embryonic development variant; postembryonic development variant
WBGene00011015|R04F11.2	254.15	55.75	4.56		107 aa	Seg		KOG4326: Mitochondrial F1F0-ATP synthase, subunit e	PF05680: ATP synthase E chain	WBPhenotype: Emb; Gro; Let; Lva; Ste; reduced brood size; thin	NOT WBPheno: Bmd; Variant
WBGene00011469|T05C12.5|dylt-3	1.32	0.29	4.55		168 aa	Seg; Ncoils		KOG4081: Dynein light chain	PF03645: Tctex-1 family	WBPhenotype: Let; Ste	NOT WBPheno: Bmd; Dyf; Emb; Gro; Lva; Lvl; Stp; Variant; postembryonic development variant
WBGene00001976|T05A7.4|hmg-11	8.24	1.81	4.55		137 aa	Seg	Thomas+W_TF				NOT WBPheno: Bmd; Emb; Gro; Let; Lva; Lvl; Ste; Stp; Variant; postembryonic development variant
WBGene00016144|C26E6.11|mmab-1	4.48	0.99	4.53	OMIM:251110 [METHYLMALONIC ACIDURIA, cblB TYPE]	214 aa			COG2096: Uncharacterized conserved protein; euNOG07379: Cob(I)Yrinic acid a,c-diamide adenosyltransferase, mitochondrial; meNOG15813: Cob(I)Yrinic acid a,c-diamide adenosyltransferase, mitochondrial	PF01923: Cobalamin adenosyltransferase	WBPhenotype: Gro; organism metabolism processing variant	NOT WBPheno: Bmd; Emb; Let; Lva; Lvl; Ste; Stp; Variant; embryonic development variant; postembryonic development variant; protein aggregation variant; transgene subcellular localization variant
WBGene00004899|C30A5.5|snb-5	1.45	0.32	4.53		102 aa	Tmhmm; Ncoils		KOG0860: Synaptobrevin/VAMP-like protein	PF00957: Synaptobrevin
WBGene00008607|F09B12.3	331.97	73.49	4.52		582 aa	Tmhmm		KOG3774: Uncharacterized conserved protein Lama; meNOG05476: Protein involved in lipid catabolic process	PF04916: Phospholipase B		NOT WBPheno: Bmd; Emb; Gro; Let; Lva; Lvl; Ste; Stp; Variant; postembryonic development variant
WBGene00001172|C51E3.7|egl-3	41.98	9.29	4.52		556-652 aa	SignalP; Seg		COG1404: Subtilisin-like serine proteases; COG4935: Regulatory P domain of the subtilisin-like proprotein convertases and other proteases; KOG3526: Subtilisin-like proprotein convertase; meNOG04355: Convertase	PF00082: Subtilase family; PF01483: Proprotein convertase P-domain	WBPhenotype: Age; Egl D; Ric; bag of worms; coiler; egg retention; post translational processing variant	NOT WBPheno: Bmd; Emb; Gro; Let; Lva; Lvl; Ste; Stp; Variant; associative learning variant; carbon dioxide avoidance variant; egg laying imipramine resistant; egg laying serotonin resistant; neuron activation variant; postembryonic development variant
WBGene00012778|Y42A5A.3	11.33	2.51	4.51		114 aa	SignalP					NOT WBPheno: Bmd; Emb; Let; Ste; Variant; postembryonic development variant
WBGene00045390|C38C3.10	0.36	0.08	4.5		103 aa	SignalP
WBGene00022029|Y65B4A.6	0.18	0.04	4.5		399 aa	Seg		COG0513: Superfamily II DNA and RNA helicases; KOG0328: Predicted ATP-dependent RNA helicase FAL1, involved in rRNA maturation, DEAD-box superfamily; meNOG06945: Eukaryotic translation initiation factor 4A, isoform 3	PF00270: DEAD/DEAH box helicase; PF00271: Helicase conserved C-terminal domain	WBPhenotype: Egl; Let; Lva; Mlt; Pvl; Ste; Unc; thin
WBGene00012005|T24H10.7|jun-1	0.9	0.2	4.5		101-319 aa	Seg; Ncoils	Thomas+W_TF	KOG0837: Transcriptional activator of the JUN family	PF00170: bZIP transcription factor	WBPhenotype: Emb; Let; Lva; Rup; Sck; Ste; bag of worms; reduced brood size; thin	NOT WBPheno: Bmd; Gro; Lvl; Stp; Unc; Variant; copper hypersensitive; postembryonic development variant
WBGene00019404|K05B2.4	5.39	1.2	4.49	OMIM:607748 [HYPERCHOLANEMIA, FAMILIAL; FHCA]	415 aa			COG1073: Hydrolases of the alpha/beta superfamily; euNOG06192: Acyl-Coa thioesterase; meNOG13131: Acyl-Coa thioesterase	PF04775: Acyl-CoA thioester hydrolase/BAAT N-terminal region; PF08840: BAAT / Acyl-CoA thioester hydrolase C terminal		NOT WBPheno: Bmd; Emb; Gro; Let; Lva; Lvl; Ste; Stp; Variant; postembryonic development variant
WBGene00007129|B0272.3	625.37	139.29	4.49	OMIM:231530 [3-@HYDROXYACYL-CoA DEHYDROGENASE DEFICIENCY]; OMIM:609975 [HYPERINSULINEMIC HYPOGLYCEMIA, FAMILIAL, 4; HHF4]	309 aa	Seg		COG1250: 3-hydroxyacyl-CoA dehydrogenase; KOG2304: 3-hydroxyacyl-CoA dehydrogenase; meNOG04022: Hydroxyacyl-Coenzyme A dehydrogenase	PF00725: 3-hydroxyacyl-CoA dehydrogenase, C-terminal domain; PF01262: Alanine dehydrogenase/PNT, C-terminal domain; PF02737: 3-hydroxyacyl-CoA dehydrogenase, NAD binding domain; PF03446: NAD binding domain of 6-phosphogluconate dehydrogenase		NOT WBPheno: Bmd; Emb; Gro; Let; Lva; Lvl; Ste; Stp; Variant; postembryonic development variant
WBGene00022453|Y110A2AR.3	53.83	12.02	4.48		69-236 aa	Seg		KOG2500: Uncharacterized conserved protein; meNOG13073: Associated protein	PF07933: Protein of unknown function (DUF1681)		NOT WBPheno: Bmd; Emb; Gro; Let; Lva; Lvl; Ste; Stp; Variant; postembryonic development variant
WBGene00013087|Y51B9A.5	0.67	0.15	4.47		90 aa						NOT WBPheno: Bmd; Emb; Let; Ste; Variant; postembryonic development variant
WBGene00006760|H14N18.1|unc-23	28.58	6.4	4.47		399-458 aa	Seg; Ncoils		KOG3633: BAG family molecular chaperone regulator 2; meNOG14742: BAG family molecular chaperone regulator 2 protein	PF02179: BAG domain	WBPhenotype: Rol; Unc; axon trajectory variant; body wall muscle myosin organization defective; commissure absent; head bent; head muscle dystrophy; organism osmotic stress response variant; sperm pseudopod variant	NOT WBPheno: Bmd; Emb; Let; Ste; Variant; postembryonic development variant
WBGene00044389|C27D6.12	1.38	0.31	4.45		44-76 aa	SignalP		KOG0709: CREB/ATF family transcription factor
WBGene00003692|T06C12.6|nhr-102	2.18	0.49	4.45		414 aa	Seg	Walhout_TF	KOG3575: FOG: Hormone receptors	PF00104: Ligand-binding domain of nuclear hormone receptor; PF00105: Zinc finger, C4 type (two domains)		NOT WBPheno: Bmd; Emb; Let; Ste; Variant; postembryonic development variant
WBGene00002259|T22G5.2|lbp-7	39.04	8.77	4.45		137 aa			KOG4015: Fatty acid-binding protein FABP; meNOG18832: Fatty acid binding protein		WBPhenotype: Age	NOT WBPheno: Bmd; Emb; Gro; Let; Lva; Lvl; Ste; Stp; Variant; postembryonic development variant
WBGene00001682|F08B6.2|gpc-2	19.72	4.43	4.45		62 aa			KOG4119: G protein gamma subunit; meNOG21283: Guanine nucleotide-binding protein G(I)/G(S)/G(O)	PF00631: GGL domain	WBPhenotype: Emb; Let; Sck; benzaldehyde chemotaxis defective	NOT WBPheno: odorant adaptation variant
WBGene00011181|R09H10.3	34.71	7.81	4.44		121-135 aa	SignalP		COG2351: Transthyretin-like protein; KOG3006: Transthyretin and related proteins; meNOG19934: Hydroxyisourate hydrolase	PF00576: HIUase/Transthyretin family		NOT WBPheno: Let; Variant; postembryonic development variant
WBGene00006617|C47D12.6|tars-1	48.09	10.82	4.44		684-725 aa			COG0441: Threonyl-tRNA synthetase; KOG1637: Threonyl-tRNA synthetase; meNOG04331: Threonyl-Trna synthetase	PF00587: tRNA synthetase class II core domain (G, H, P, S and T); PF02824: TGS domain; PF03129: Anticodon binding domain; PF07973: Threonyl and Alanyl tRNA synthetase second additional domain	WBPhenotype: Emb; Lva; Lvl; Stp	NOT WBPheno: Let; Variant; postembryonic development variant
WBGene00013671|Y105E8A.11	14.03	3.17	4.43	OMIM:614299 [MULTIPLE MITOCHONDRIAL DYSFUNCTIONS SYNDROME 2; MMDS2]	106 aa			COG0271: Stress-induced morphogen (activity unknown); KOG3348: BolA (bacterial stress-induced morphogen)-related protein; meNOG21158: Bola-Like protein			NOT WBPheno: Bmd; Emb; Gro; Let; Lva; Lvl; Ste; Stp; Variant; postembryonic development variant
WBGene00010884|M7.8	9.56	2.16	4.43		230 aa						NOT WBPheno: Bmd; Emb; Gro; Let; Lva; Lvl; Ste; Stp; Variant; postembryonic development variant
WBGene00011072|R06F6.11|tag-209	43.64	9.87	4.42		99 aa	SignalP; Seg					NOT WBPheno: Bmd; Emb; Gro; Let; Lva; Lvl; Ste; Stp; Variant; postembryonic development variant
WBGene00022458|Y110A7A.8	12.12	2.75	4.41	OMIM:600138 [RETINITIS PIGMENTOSA 11; RP11]	504 aa	Seg		COG1498: Protein implicated in ribosomal biogenesis, Nop56p homolog; KOG2574: mRNA splicing factor PRP31; meNOG05428: U4/U6 small nuclear ribonucleoprotein Prp31 (Pre-mRNA-processing factor 31)	PF01798: Putative snoRNA binding domain; PF08060: NOSIC (NUC001) domain; PF09785: Prp31 C terminal domain	WBPhenotype: Emb; Led; Let; Mlt; Pvl; Rup; Ste; Stp; Unc; cell proliferation increased; excess intestinal cells; late embryonic arrest; protein aggregation variant; reduced brood size; transgene expression increased; transgene subcellular localization variant	NOT WBPheno: Bmd; Variant
WBGene00018672|F52C9.1	63.46	14.39	4.41		1422 aa	Seg		KOG1786: Lysosomal trafficking regulator LYST and related BEACH and WD40 repeat proteins; KOG4190: Uncharacterized conserved protein; KOG4435: Predicted lipid kinase; meNOG05934: WD repeat protein	PF00400: WD domain, G-beta repeat; PF02138: Beige/BEACH domain	WBPhenotype: Gro; Ric	NOT WBPheno: Bmd; Emb; Lva; Lvl; Ste; Stp; Variant; embryonic development variant; postembryonic development variant
WBGene00017460|F14D2.12|bath-30	12.43	2.82	4.41		314 aa			euNOG06058: Kelch repeat and BTB protein	PF00651: BTB/POZ domain; PF00917: MATH domain		NOT WBPheno: Let; Variant; postembryonic development variant
WBGene00013719|Y106G6H.6	15.2	3.45	4.41		405 aa					WBPhenotype: Emb; Ste	NOT WBPheno: Bmd; Gro; Let; Lva; Lvl; Stp; Variant; postembryonic development variant
WBGene00006048|ZK1225.6|ssp-31	0.97	0.22	4.41		107 aa						NOT WBPheno: Bmd; Emb; Gro; Let; Lva; Lvl; Ste; Stp; Variant; postembryonic development variant
WBGene00003802|Y56A3A.17|npp-16	0.75	0.17	4.41		497-512 aa	Seg		KOG2724: Nuclear pore complex component NPAP60L/NUP50; meNOG08050: Nucleoporin protein		WBPhenotype: RNAi resistant; somatic transgene silencing variant; transgene expression increased	NOT WBPheno: Bmd; Emb; Gro; Let; Lva; Lvl; Ste; Stp; Variant; embryonic development variant; postembryonic development variant
WBGene00008505|F01G4.6	3401.05	774.08	4.39	OMIM:610773 [MITOCHONDRIAL PHOSPHATE CARRIER DEFICIENCY]	340-387 aa	Tmhmm; Seg		KOG0767: Mitochondrial phosphate carrier protein; meNOG06732: Mitochondrial protein	PF00153: Mitochondrial carrier protein	WBPhenotype: Emb; Gro; Lva; Pvl; Ste; reduced brood size	NOT WBPheno: Bmd; Variant; nicotine response variant
WBGene00004705|C18D11.4|rsp-8	409.4	93.36	4.39		309 aa	Seg		COG0724: RNA-binding proteins (RRM domain); KOG0118: FOG: RRM domain; meNOG19371: 10 (Transformer-2-beta) (HTRA2- beta) protein	PF00076: RNA recognition motif. (a.k.a. RRM, RBD, or RNP domain)	WBPhenotype: Emb; Gro; Let; Lva; Lvl; Pvl; Rup; Sck; Ste; Unc; gonad development variant; intestinal physiology variant; oocyte morphology variant; oogenesis variant; reduced brood size; transgene expression increased	NOT WBPheno: Bmd; Variant
WBGene00004048|K04B12.1|plx-2	36.67	8.36	4.39		1766 aa	SignalP; Tmhmm; Seg; Ncoils		KOG3610: Plexins (functional semaphorin receptors); meNOG05618: Precursor	PF01437: Plexin repeat; PF01833: IPT/TIG domain; PF08337: Plexin cytoplasmic RasGAP domain		NOT WBPheno: Bmd; Emb; Gro; Let; Lva; Lvl; Ram; Ste; Stp; Variant; postembryonic development variant; presynaptic vesicle cluster variant
WBGene00000935|F56D1.7|daz-1	268.21	61.08	4.39		498 aa	Seg		KOG0118: FOG: RRM domain; meNOG14443: Protein boule	PF00076: RNA recognition motif. (a.k.a. RRM, RBD, or RNP domain)	WBPhenotype: Stp; pattern of transgene expression variant; receptor mediated endocytosis defective	NOT WBPheno: Bmd; Emb; Ste; Variant
WBGene00000891|Y87G2A.6|cyn-15	3.07	0.7	4.39		629 aa			COG0652: Peptidyl-prolyl cis-trans isomerase (rotamase) - cyclophilin family; COG2319: FOG: WD40 repeat; KOG0882: Cyclophilin-related peptidyl-prolyl cis-trans isomerase; meNOG05708: Isomerase	PF00160: Cyclophilin type peptidyl-prolyl cis-trans isomerase/CLD; PF00400: WD domain, G-beta repeat		NOT WBPheno: Bmd; Emb; Let; Ste; Variant; postembryonic development variant
WBGene00008528|F02E9.1	51.54	11.77	4.38		154 aa	Seg; Ncoils					NOT WBPheno: Bmd; Emb; Gro; Let; Lva; Lvl; Ste; Stp; Variant; postembryonic development variant
WBGene00020284|T06A10.1|mel-46	4.19	0.96	4.36		973 aa	Seg; Ncoils		COG0513: Superfamily II DNA and RNA helicases; KOG4284: DEAD box protein; meNOG06195: Probable ATP-dependent RNA helicase DDX20 (EC 3.6.1.-)	PF00270: DEAD/DEAH box helicase; PF00271: Helicase conserved C-terminal domain	WBPhenotype: Gro; Mel; pattern of transgene expression variant; receptor mediated endocytosis defective	NOT WBPheno: Bmd; Emb; Lva; Lvl; Ste; Stp; Variant; postembryonic development variant
WBGene00010073|F54F12.2	5.05	1.16	4.35		239-260 aa	Tmhmm; Seg; Ncoils					NOT WBPheno: Bmd; Emb; Ste; Variant; embryonic development variant; postembryonic development variant
WBGene00044480|ZK185.4	0.13	0	4.33		281 aa	Tmhmm		KOG3979: FGF receptor activating protein 1	PF10277: Frag1/DRAM/Sfk1 family
WBGene00017706|F22E5.7	0.13	0	4.33		144 aa	SignalP; Tmhmm; Seg			PF05912: Caenorhabditis elegans protein of unknown function (DUF870)		NOT WBPheno: Bmd; Emb; Ste; Variant
WBGene00011796|T16G1.2	0.13	0	4.33		205-407 aa	SignalP; Seg					NOT WBPheno: Emb; Gro; Let; Lva; Lvl; Ste; Stp; Variant; postembryonic development variant
WBGene00010672|K08E7.4	0.13	0	4.33		139 aa	Tmhmm; Seg					NOT WBPheno: Bmd; Emb; Gro; Lva; Lvl; Ste; Stp; Variant; postembryonic development variant
WBGene00004304|C26D10.1|ran-3	175.37	40.54	4.33		569 aa	Seg		COG5184: Alpha-tubulin suppressor and related RCC1 domain-containing proteins; KOG1426: FOG: RCC1 domain; meNOG06449: Regulator of chromosome condensation protein	PF00415: Regulator of chromosome condensation (RCC1) repeat	WBPhenotype: Emb; Gro; Lvl; Mul; Pvl; RNAi resistant; Ste; cell division slow; chromosome morphology variant; chromosome segregation variant; nuclear envelope breakdown variant; pattern protein expression variant; somatic transgene silencing variant; transgene expression increased	NOT WBPheno: protein subcellular localization variant
WBGene00014213|ZK1073.1	9.37	2.17	4.32		325 aa			KOG2931: Differentiation-related gene 1 protein (NDR1 protein), related proteins; meNOG19302: Annotation not available	PF03096: Ndr family		NOT WBPheno: Bmd; Emb; Gro; Lva; Lvl; Ste; Stp; Variant; postembryonic development variant
WBGene00015868|C16H3.3	0.56	0.13	4.31		655-791 aa	Seg; Ncoils					NOT WBPheno: Bmd; Emb; Gro; Let; Lva; Lvl; Ste; Stp; Variant; postembryonic development variant
WBGene00004496|F56E10.4|rps-27	84.6	19.62	4.31		83 aa	Seg		COG2051: Ribosomal protein S27E; KOG1779: 40s ribosomal protein S27; meNOG20962: Ribosomal protein S27	PF01667: Ribosomal protein S27	WBPhenotype: Age; Emb; Gro; Lva; Stp; pathogen resistance increased; transgene expression reduced
WBGene00011575|T07C12.11	2.32	0.54	4.3		329 aa	Seg	Thomas+W_TF		PF10545: Alcohol dehydrogenase transcription factor Myb/SANT-like	WBPhenotype: fat content reduced	NOT WBPheno: Bmd; Emb; Gro; Lva; Lvl; Ste; Stp; Variant; fat content variant; postembryonic development variant
WBGene00000156|K04G2.8|apr-1	0.86	0.2	4.3	OMIM:114500 [COLORECTAL CANCER; CRC]; OMIM:114550 [HEPATOCELLULAR CARCINOMA]; OMIM:135290 [DESMOID DISEASE, HEREDITARY]; OMIM:137215 [GASTRIC CANCER, HEREDITARY DIFFUSE; HDGC]; OMIM:155255 [MEDULLOBLASTOMA; MDB]; OMIM:175100 [FAMILIAL ADENOMATOUS POLYPOSIS 1; FAP1]; OMIM:276300 [MISMATCH REPAIR CANCER SYNDROME]; OMIM:613659 [GASTRIC CANCER]	1186-1188 aa	Seg; Ncoils		KOG2122: Beta-catenin-binding protein APC, contains ARM repeats; meNOG11256: Polyposis coli protein		WBPhenotype: Bmd; Emb; Gro; Lva; Lvl; Muv; Ste; T lineages variant; Unc; V lineages variant; Vab; asymmetric cell division variant; body elongation retracted; cell fate transformation; dorsal intercalation defective; hypodermal cell elongation defective; hypodermis disorganized; no gut granules; pattern protein expression variant; protein export from nucleus defective; protein expression absent; …	NOT WBPheno: Variant
WBGene00016452|C35D10.17	2.96	0.69	4.29		102 aa			NOG135403: Annotation not available; euNOG21826: Annotation not available; meNOG29295: UPF0287 protein			NOT WBPheno: Bmd; Emb; Ste; Variant
WBGene00013905|ZC455.5|ugt-4	0.3	0.07	4.29		535 aa	SignalP; Tmhmm; Seg		COG1819: Glycosyl transferases, related to UDP-glucuronosyltransferase; KOG1192: UDP-glucuronosyl and UDP-glucosyl transferase	PF00201: UDP-glucoronosyl and UDP-glucosyl transferase; PF04101: Glycosyltransferase family 28 C-terminal domain		NOT WBPheno: Bmd; Emb; Let; Ste; Variant; postembryonic development variant
WBGene00013711|Y106G6G.2	0.3	0.07	4.29		821 aa	Seg		KOG1846: Uncharacterized conserved protein, contains Sec7 domain; meNOG06445: ARF guanyl-nucleotide exchange factor			NOT WBPheno: Bmd; Emb; Gro; Lva; Lvl; Ste; Stp; Variant; postembryonic development variant
WBGene00013004|Y48E1B.5	3.26	0.76	4.29		495 aa	Seg			PF07147: Mitochondrial 28S ribosomal protein S30 (PDCD9)	WBPhenotype: Clr; Emb; Gro; Lva; Pvl; Ste; reduced brood size	NOT WBPheno: Let; Variant; postembryonic development variant
WBGene00000814|B0025.2|csn-2	196.55	45.85	4.29		495 aa	Seg		COG5159: 26S proteasome regulatory complex component; KOG1464: COP9 signalosome, subunit CSN2; meNOG04003: Cop9 signalosome complex protein	PF01399: PCI domain; PF10075: COP9 signalosome, subunit CSN8	WBPhenotype: Cyk; Emb; Let; Spn; Ste
WBGene00020187|T03F1.5|gsp-4	20.12	4.7	4.28		305 aa	Seg		COG0639: Diadenosine tetraphosphatase and related serine/threonine protein phosphatases; KOG0374: Serine/threonine specific protein phosphatase PP1, catalytic subunit; meNOG04633: Protein phosphatase	PF00149: Calcineurin-like phosphoesterase
WBGene00018532|F47B7.1	11.82	2.77	4.27		59 aa	SignalP; Tmhmm; Seg		KOG1773: Stress responsive protein	PF01679: Uncharacterized protein family UPF0057		NOT WBPheno: Bmd; Emb; Let; Ste; Variant; postembryonic development variant
WBGene00012548|Y37D8A.6	9.57	2.24	4.27	OMIM:601098 [CHARCOT-MARIE-TOOTH DISEASE, DEMYELINATING, TYPE 1C; CMT1C]	132 aa	Tmhmm; Seg					NOT WBPheno: Emb; Gro; Let; Lva; Lvl; Ste; Stp; Variant; postembryonic development variant
WBGene00012917|Y46G5A.29	3.71	0.87	4.26		756 aa	SignalP		KOG1217: Fibrillins and related proteins containing Ca2+-binding EGF-like domains; KOG3371: Uncharacterized conserved protein; meNOG06654: Neurogenic locus notch protein	PF00008: EGF-like domain; PF01549: ShK domain-like; PF02014: Reeler domain; PF08768: Domain of unknown function (DUF1794)		NOT WBPheno: Bmd; Emb; Gro; Lva; Lvl; Ste; Stp; Variant; postembryonic development variant
WBGene00003236|F13G3.9|mif-3	42.36	9.95	4.26	OMIM:604302 [RHEUMATOID ARTHRITIS, SYSTEMIC JUVENILE]	146 aa	Tmhmm		KOG1759: Macrophage migration inhibitory factor	PF01187: Macrophage migration inhibitory factor (MIF)		NOT WBPheno: Bmd; Emb; Gro; Let; Lva; Lvl; Ste; Stp; Variant; postembryonic development variant
WBGene00016274|C30G12.2	698.1	164.44	4.25		265 aa			COG1028: Dehydrogenases with different specificities (related to short-chain alcohol dehydrogenases); KOG1611: Predicted short chain-type dehydrogenase; meNOG18583: Annotation not available	PF00106: short chain dehydrogenase		NOT WBPheno: Bmd; Emb; Gro; Let; Lva; Lvl; Ste; Stp; Variant; postembryonic development variant
WBGene00004429|Y48G8AL.8|rpl-17	22576.9	5307.26	4.25		159-187 aa			COG0091: Ribosomal protein L22; KOG3353: 60S ribosomal protein L22; meNOG10551: Ribosomal protein L17	PF00237: Ribosomal protein L22p/L17e	WBPhenotype: Emb; Gro; Lva; Ste; Unc; axon fasciculation variant; axon midline crossing variant; cord commissures fail to reach target; protein aggregation variant; reduced brood size; transgene subcellular localization variant; ventral cord patterning variant
WBGene00002274|F38A5.3|lec-11	93.39	22.06	4.23		106-232 aa	Seg		KOG3587: Galectin, galactose-binding lectin	PF00337: Galactoside-binding lectin		NOT WBPheno: Bmd; Emb; Gro; Let; Lva; Lvl; Ste; Stp; Variant; postembryonic development variant
WBGene00000239|C05D2.4|bas-1	26.42	6.27	4.21	OMIM:608643 [AROMATIC L-AMINO ACID DECARBOXYLASE DEFICIENCY]	514-523 aa			COG0076: Glutamate decarboxylase and related PLP-dependent proteins; KOG0628: Aromatic-L-amino-acid/L-histidine decarboxylase; meNOG04926: Decarboxylase	PF00282: Pyridoxal-dependent decarboxylase conserved domain	WBPhenotype: aqueous adaptation defective; dopamine deficient; serotonin deficient	NOT WBPheno: Bmd; Emb; Gro; Let; Lva; Lvl; Ste; Stp; Variant; embryonic development variant; nicotine response variant; postembryonic development variant
WBGene00017781|F25E2.3	0.21	0.05	4.2		327 aa			COG1946: Acyl-CoA thioesterase; KOG3016: Acyl-CoA thioesterase; meNOG07753: Acyl-Coenzyme A thioesterase 8 (EC 3.1.2.27)	PF02551: Acyl-CoA thioesterase		NOT WBPheno: Bmd; Emb; Gro; Let; Lva; Lvl; Ste; Stp; Variant; postembryonic development variant
WBGene00019698|M01B12.5|riok-1	6.96	1.66	4.19		264-506 aa	Seg; Ncoils		COG1718: Serine/threonine protein kinase involved in cell cycle control; KOG2270: Serine/threonine protein kinase involved in cell cycle control; meNOG05024: Serine/Threonine-Protein kinase rio1	PF01163: RIO1 family	WBPhenotype: Emb; Gro; Let; Lva; Lvl; Pvl; Sck; Ste; fat content reduced; pattern of transgene expression variant; receptor mediated endocytosis defective; reduced brood size; small	NOT WBPheno: Bmd; Variant
WBGene00003183|T01G9.5|mei-1	840.3	200.69	4.19		472-475 aa	Seg; Ncoils		COG0464: ATPases of the AAA+ class; KOG0738: AAA+-type ATPase; meNOG05153: Katanin p60 (ATPase-containing) subunit A	PF00004: ATPase family associated with various cellular activities (AAA); PF05496: Holliday junction DNA helicase ruvB N-terminus	WBPhenotype: Cyk; Emb; Him; Mei; Mul; P granule localization defective; meiotic spindle defective early emb	NOT WBPheno: anaphase bridging; protein expression variant; spindle orientation variant
WBGene00016721|C46G7.1	22.62	5.42	4.17		93 aa	SignalP; Tmhmm				WBPhenotype: early larval arrest
WBGene00016081|C25A6.1	0.25	0.06	4.17		300 aa	Seg		COG0639: Diadenosine tetraphosphatase and related serine/threonine protein phosphatases; KOG0374: Serine/threonine specific protein phosphatase PP1, catalytic subunit; meNOG04849: Protein phosphatase	PF00149: Calcineurin-like phosphoesterase		NOT WBPheno: Bmd; Emb; Let; Ste; Variant; postembryonic development variant
WBGene00015798|C15H9.2	0.5	0.12	4.17		265 aa				PF00651: BTB/POZ domain		NOT WBPheno: Bmd; Emb; Let; Ste; Variant; postembryonic development variant
WBGene00015010|B0041.6|ptps-1	7.22	1.73	4.17	OMIM:261640 [HYPERPHENYLALANINEMIA, BH4-DEFICIENT, A; HPABH4A]	137-140 aa			COG0720: 6-pyruvoyl-tetrahydropterin synthase; KOG4105: 6-pyruvoyl tetrahydrobiopterin synthase; meNOG18734: 6-Pyruvoyl tetrahydrobiopterin synthase (EC 4.2.3.12)			NOT WBPheno: Bmd; Emb; Gro; Let; Lva; Lvl; Ste; Stp; Variant; postembryonic development variant
WBGene00011720|T11G6.5	45.2	10.85	4.17		1349-1406 aa	Seg					NOT WBPheno: Bmd; Emb; Let; Ste; Variant
WBGene00020617|T20D4.11	3.08	0.74	4.16		199 aa	SignalP; Seg			PF01579: Domain of unknown function DUF19		NOT WBPheno: Bmd; Emb; Let; Ste; Variant; postembryonic development variant
WBGene00008626|F09E8.8	2.82	0.68	4.15		72 aa	SignalP; Tmhmm; Seg
WBGene00004681|F52G2.2|rsd-2	34.99	8.43	4.15		417-1319 aa	Seg; Ncoils			PF07547: RSD-2 N-terminal domain	WBPhenotype: RNAi resistant; somatic transgene silencing variant; transgene expression increased	NOT WBPheno: Bmd; Emb; Let; Ste; Variant; postembryonic development variant
WBGene00012004|T24H10.6|dyrb-1	143.98	34.76	4.14		95 aa			KOG4115: Dynein-associated protein Roadblock; meNOG20465: Dynein light chain roadblock-type 2 protein	PF03259: Roadblock/LC7 domain	WBPhenotype: Abs; Dpy; Egl; Emb; Pvl	NOT WBPheno: Gro; Let; Lva; Lvl; Ste; Stp; Tum; Variant; postembryonic development variant
WBGene00003711|E02H9.8|nhr-121	7.41	1.79	4.14		461-463 aa	Seg	Walhout_TF	KOG3575: FOG: Hormone receptors	PF00104: Ligand-binding domain of nuclear hormone receptor; PF00105: Zinc finger, C4 type (two domains)		NOT WBPheno: Bmd; Emb; Gro; Let; Lva; Lvl; Ste; Stp; Variant; embryonic development variant; postembryonic development variant
WBGene00002344|M7.1|let-70	1335.98	323	4.14		147 aa			COG5078: Ubiquitin-protein ligase; KOG0417: Ubiquitin-protein ligase; meNOG05057: Ubiquitin protein	PF00179: Ubiquitin-conjugating enzyme	WBPhenotype: Adl; Emb; Emo; Lva; Lvl; Pvl; Ric; Sck; Ste; Unc; germ cell development variant; gonad morphology variant; meiosis variant; reduced brood size; thin; transgene expression reduced	NOT WBPheno: Bmd; Let; Variant; protein aggregation variant; transgene subcellular localization variant
WBGene00020824|T26A8.1	85.54	20.77	4.12		708 aa	Tmhmm; Seg; Ncoils					NOT WBPheno: Bmd; Emb; Gro; Let; Lva; Lvl; Ste; Stp; Variant; postembryonic development variant
WBGene00019697|M01B12.4	41.72	10.12	4.12		634-678 aa	Seg; Ncoils					NOT WBPheno: Bmd; Emb; Gro; Let; Lva; Lvl; Ste; Stp; Variant; postembryonic development variant
WBGene00007675|C18D4.6	8.2	1.99	4.12		47-320 aa						NOT WBPheno: Bmd; Emb; Let; Ste; Variant; postembryonic development variant
WBGene00001177|B0348.4|egl-8	6.17	1.5	4.11	OMIM:613722 [EPILEPTIC ENCEPHALOPATHY, EARLY INFANTILE, 12; EIEE12]	592-1431 aa	Tmhmm; Seg; Ncoils		KOG1265: Phospholipase C; meNOG06647: Phospholipase c	PF00168: C2 domain; PF00387: Phosphatidylinositol-specific phospholipase C, Y domain; PF00388: Phosphatidylinositol-specific phospholipase C, X domain; PF06631: Protein of unknown function (DUF1154); PF09279: Phosphoinositide-specific phospholipase C, efhand-like	WBPhenotype: Bus; Con; Egl; Emb; Gro; Ric; antimicrobial gene expression variant; bag of worms; bloated; defecation contraction variant; drug response variant; egg laying imipramine resistant; egg laying serotonin resistant; fertility variant; intestinal physiology variant; levamisole resistant; male sterile; pBoc; pharyngeal pumping reduced; posterior body wall contraction defective; serotonin i…	NOT WBPheno: Bmd; Emo; Let; Ste; Variant; drug induced gene expression variant; electrophysiology variant; fat content variant; germ cell morphology variant; gonad sheath contraction rate reduced; osmotic stress response variant; ovulation variant; reduced brood size; response to injury variant; serotonin induced fat reduction variant
WBGene00017241|F08C6.2	0.82	0.2	4.1		354-362 aa	Seg		COG0615: Cytidylyltransferase; KOG2804: Phosphorylcholine transferase/cholinephosphate cytidylyltransferase; meNOG08429: Phosphate cytidylyltransferase	PF01467: Cytidylyltransferase	WBPhenotype: Lva; Unc; late larval arrest	NOT WBPheno: Bmd; Emb; Gro; Let; Lvl; Ste; Stp; Variant; postembryonic development variant; transgene expression reduced
WBGene00012759|Y41C4A.13	12.8	3.12	4.1		103 aa	SignalP; Tmhmm; Seg			PF10853: Protein of unknown function (DUF2650)		NOT WBPheno: Bmd; Emb; Gro; Let; Lva; Lvl; Ste; Stp; Variant; embryonic development variant; postembryonic development variant
WBGene00006364|F59F5.6|syd-2	0.41	0.1	4.1		1139 aa	Seg; Ncoils		KOG0249: LAR-interacting protein and related proteins; meNOG04887: Liprin alpha protein	PF00536: SAM domain (Sterile alpha motif); PF07647: SAM domain (Sterile alpha motif)	WBPhenotype: Ric; egg retention; protein subcellular localization variant	NOT WBPheno: Bmd; Emb; Gro; Lva; Lvl; Ste; Stp; Variant; postembryonic development variant
WBGene00000440|D1007.1|ceh-17	0.86	0.21	4.1	OMIM:142623 [HIRSCHSPRUNG DISEASE, SUSCEPTIBILITY TO, 1; HSCR1]; OMIM:209880 [CENTRAL HYPOVENTILATION SYNDROME, CONGENITAL; CCHS]; OMIM:256700 [NEUROBLASTOMA, SUSCEPTIBILITY TO]; OMIM:602078 [FIBROSIS OF EXTRAOCULAR MUSCLES, CONGENITAL, 2; CFEOM2]; OMIM:611548 [PREMATURE OVARIAN FAILURE 5; POF5]; OMIM:613013 [NEUROBLASTOMA, SUSCEPTIBILITY TO, 2; NBLST2]	237 aa	Seg	Thomas+W_TF	KOG0484: Transcription factor PHOX2/ARIX, contains HOX domain; meNOG12689: Paired mesoderm homeobox protein 2A	PF00046: Homeobox domain; PF12413: Homeobox protein distal-less-like N terminal		NOT WBPheno: Bmd; Emb; Gro; Let; Lva; Lvl; Ste; Stp; Variant; carbon dioxide avoidance variant; postembryonic development variant
WBGene00016410|C34E10.9	6.09	1.49	4.09		122 aa						NOT WBPheno: Bmd; Emb; Let; Ste; Variant; embryonic development variant; postembryonic development variant
WBGene00009562|F39H2.1|flp-22	14.77	3.62	4.08		93 aa	SignalP			PF01581: FMRFamide related peptide family		NOT WBPheno: Bmd; Emb; Ste; Variant
WBGene00021312|Y32H12A.4	324.04	79.52	4.07		193 aa	Seg		KOG4041: Protein phosphatase 1, regulatory (inhibitor) subunit PPP1R2; meNOG19077: Protein phosphatase	PF04979: Protein phosphatase inhibitor 2 (IPP-2)	WBPhenotype: Emb; Gro; Let; Ste	NOT WBPheno: Bmd; Lva; Lvl; Stp; Variant; embryonic development variant; postembryonic development variant
WBGene00013523|Y73F8A.14	15.14	3.72	4.07		129 aa						NOT WBPheno: Let; Variant; postembryonic development variant
WBGene00021735|Y50D4A.1	15.57	3.85	4.04		690-821 aa	Seg; Ncoils					NOT WBPheno: Bmd; Emb; Let; Ste; Variant; postembryonic development variant
WBGene00016106|C25F6.7	5.61	1.39	4.04	OMIM:117300 [CEREBRAL AMYLOID ANGIOPATHY, ITM2B-RELATED, 2]; OMIM:176500 [CEREBRAL AMYLOID ANGIOPATHY, ITM2B-RELATED, 1]	321-322 aa	Tmhmm; Seg		KOG4681: Uncharacterized conserved protein; meNOG14116: Integral membrane protein 2A	PF04089: BRICHOS domain		NOT WBPheno: Bmd; Emb; Ste; Variant
WBGene00010424|H36L18.2	3313.4	820.31	4.04		72 aa						NOT WBPheno: Bmd; Emb; Gro; Let; Lva; Lvl; Ste; Stp; Variant; postembryonic development variant
WBGene00002129|K02B2.4|inx-7	5.61	1.39	4.04		556 aa	Tmhmm; Seg			PF00876: Innexin	WBPhenotype: reduced brood size	NOT WBPheno: Bmd; Emb; Gro; Let; Lva; Lvl; Sck; Ste; Stp; Variant; postembryonic development variant
WBGene00001754|F11G11.3|gst-6	12.19	3.02	4.04		206 aa			KOG1695: Glutathione S-transferase; meNOG14525: Glutathione protein	PF00043: Glutathione S-transferase, C-terminal domain; PF02798: Glutathione S-transferase, N-terminal domain	WBPhenotype: enzyme activity reduced; organism electrophilic stress hypersensitive	NOT WBPheno: Age; Bmd; Emb; Gro; Let; Lva; Lvl; Ste; Stp; Variant; postembryonic development variant
WBGene00022039|Y65B4BL.7	5.92	1.47	4.03		214 aa	Tmhmm					NOT WBPheno: Bmd; Emb; Let; Ste; Variant
WBGene00008980|F20D1.10|tag-299	14.58	3.62	4.03		90 aa	Tmhmm		KOG4542: Predicted membrane protein; meNOG29299: UPF0466 protein			NOT WBPheno: Bmd; Emb; Let; Ste; Variant; postembryonic development variant
WBGene00000835|ZK652.11|cuc-1	28.62	7.11	4.03		69 aa			KOG1603: Copper chaperone; meNOG21654: Copper transport protein ATOX1 (Metal transport protein ATX1)	PF00403: Heavy-metal-associated domain		NOT WBPheno: Bmd; Emb; Let; Ste; Variant; postembryonic development variant
WBGene00044337|C03G5.9|nspc-2	29.62	7.36	4.02		101 aa	SignalP
WBGene00008255|C51E3.10	5.19	1.29	4.02		19-62 aa	SignalP; Tmhmm
WBGene00044587|K03D3.12|srz-105	0.12	0	4		305 aa	Tmhmm			PF10325: Serpentine type 7TM GPCR chemoreceptor Srz
WBGene00022171|Y71H2AM.6	0.12	0	4		96-277 aa			COG0452: Phosphopantothenoylcysteine synthetase/decarboxylase; KOG2728: Uncharacterized conserved protein with similarity to phosphopantothenoylcysteine synthetase/decarboxylase; meNOG11079: Phosphopantothenoylcysteine synthetase	PF04127: DNA / pantothenate metabolism flavoprotein		NOT WBPheno: Bmd; Emb; Ste; Variant
WBGene00021469|Y39G10AR.11	0.52	0.13	4	OMIM:188550 [THYROID CARCINOMA, PAPILLARY]	788 aa	Seg; Ncoils				WBPhenotype: Emb	NOT WBPheno: Bmd; Gro; Lva; Lvl; Ste; Stp; Variant; postembryonic development variant
WBGene00021089|W08E12.8	0.12	0	4		129-151 aa	Seg					NOT WBPheno: Bmd; Emb; Let; Ste; Variant; postembryonic development variant
WBGene00019499	0.12	0	4
WBGene00018431|F44E7.9	0.12	0	4		121 aa	Tmhmm		KOG3415: Putative Rab5-interacting protein; meNOG19182: Rab5-Interacting protein	PF07019: Rab5-interacting protein (Rab5ip)		NOT WBPheno: Emb; Gro; Let; Lva; Lvl; Ste; Stp; Variant; postembryonic development variant
WBGene00017926|F29C4.2	137.87	34.46	4		90 aa	Tmhmm			PF02937: Cytochrome c oxidase subunit VIc	WBPhenotype: Age; Emb; Gro; Lon; Lva; Pvl; Sck; Ste; Stp; Unc; paraquat resistant; reduced brood size; thin	NOT WBPheno: Bmd; Variant
WBGene00010148|F56D5.3	2.08	0.52	4		449 aa			COG1902: NADH:flavin oxidoreductases, Old Yellow Enzyme family; KOG0134: NADH:flavin oxidoreductase/12-oxophytodienoate reductase; meNOG27199: FMN binding protein	PF00724: NADH:flavin oxidoreductase / NADH oxidase family		NOT WBPheno: Bmd; Emb; Gro; Let; Lva; Lvl; Ste; Stp; Variant; postembryonic development variant
WBGene00004988|T08A9.7|spp-3	16.16	4.04	4		100 aa	SignalP		KOG1340: Prosaposin			NOT WBPheno: fewer eggs laid; increased pathogen survival
WBGene00004973|C06E7.6|spe-27	0.12	0	4		131 aa	SignalP					NOT WBPheno: Let; Variant; postembryonic development variant
WBGene00003413|Y43F8C.12|mrp-7	48.12	12.04	4	OMIM:125853 [DIABETES MELLITUS, NONINSULIN-DEPENDENT; NIDDM]; OMIM:237500 [DUBIN-JOHNSON SYNDROME; DJS]; OMIM:240800 [HYPOGLYCEMIA, LEUCINE-INDUCED; LIH]; OMIM:256450 [HYPERINSULINEMIC HYPOGLYCEMIA, FAMILIAL, 1; HHF1]; OMIM:602485 [HYPERINSULINEMIC HYPOGLYCEMIA, FAMILIAL, 3; HHF3]; OMIM:606176 [DIABETES MELLITUS, PERMANENT NEONATAL; PNDM]; OMIM:608569 [CARDIOMYOPATHY, DILATED, 1O; CMD1O]; OMIM:61…	1525 aa	Tmhmm; Seg		COG1132: ABC-type multidrug transport system, ATPase and permease components; KOG0054: Multidrug resistance-associated protein/mitoxantrone resistance protein, ABC superfamily; meNOG07255: Resistance protein	PF00005: ABC transporter; PF00664: ABC transporter transmembrane region		NOT WBPheno: Bmd; Emb; Let; Ste; Variant
WBGene00003106|T27A1.6|mab-9	0.12	0	4	OMIM:303400 [CLEFT PALATE, X-LINKED; CPX]; OMIM:611363 [ATRIAL SEPTAL DEFECT 4; ASD4]	346 aa	Seg	Thomas+W_TF	KOG3586: TBX1 and related T-box transcription factors; meNOG07324: T-Box transcription factor TBX20 (T-box protein 20)	PF00907: T-box	WBPhenotype: Emb; Mab; axon guidance variant; backward locomotion variant; commisure growth variant; gene expression level reduced; hindgut morphology variant; male copulatory structure absent; male tail development variant	NOT WBPheno: Bmd; Gro; Let; Lva; Lvl; Ste; Stp; Variant; neuron migration variant; postembryonic development variant
WBGene00003034|F42A9.2|lin-49	1.72	0.43	4		1042 aa	Seg; Ncoils	Gupta_TF	COG5141: PHD zinc finger-containing protein; KOG0955: PHD finger protein BR140/LIN-49; meNOG04723: Bromodomain protein	PF00439: Bromodomain; PF10513: Enhancer of polycomb-like	WBPhenotype: Gro; Let; Lvl; Mab; Stp; Unc; Vul; cell division variant male; hindgut morphology variant; loss of asymmetry ASE; loss of asymmetry AWC; male tail development variant; pattern of transgene expression variant; protein aggregation variant; reduced brood size	NOT WBPheno: Bmd; Emb; Lva; Ste; Variant; postembryonic development variant
WBGene00001892|K06C4.10|his-18	0.12	0	4		103 aa	Seg		COG2036: Histones H3 and H4; KOG3467: Histone H4; meNOG20073: Histone H4 protein	PF00125: Core histone H2A/H2B/H3/H4; PF00808: Histone-like transcription factor (CBF/NF-Y) and archaeal histone; PF02969: TATA box binding protein associated factor (TAF)
WBGene00000459|F22D3.1|ceh-38	0.52	0.13	4		632-641 aa	Seg	Thomas+W_TF	KOG2252: CCAAT displacement protein and related homeoproteins; meNOG08457: One cut domain, family member protein	PF00046: Homeobox domain; PF02376: CUT domain		NOT WBPheno: Bmd; Ced; Emb; Let; Mab; Ste; Variant; neuron development variant; postembryonic development variant
WBGene00045457|F33H12.7	5.47	1.37	3.99		152 aa
WBGene00006542|T20B12.2|tbp-1	5.46	1.37	3.99	OMIM:168600 [PARKINSON DISEASE, LATE-ONSET; PD]; OMIM:607136 [SPINOCEREBELLAR ATAXIA 17; SCA17]	340 aa	Seg		COG2101: TATA-box binding protein (TBP), component of TFIID and TFIIIB; KOG3302: TATA-box binding protein (TBP), component of TFIID and TFIIIB; meNOG05255: Tata-Box binding protein	PF00352: Transcription factor TFIID (or TATA-binding protein, TBP)	WBPhenotype: Age; Emb; Gro; Lva; Lvl; pattern of transgene expression variant; receptor mediated endocytosis defective; reduced brood size	NOT WBPheno: Bmd; Ste; Variant
WBGene00003457|ZK1248.6|msp-64	21.86	5.48	3.99		127 aa				PF00635: MSP (Major sperm protein) domain	WBPhenotype: Emb	NOT WBPheno: Let; Variant; postembryonic development variant
WBGene00022257|Y73B6BL.38|puf-11	3.18	0.8	3.98		505 aa			COG5099: RNA-binding protein of the Puf family, translational repressor; KOG1488: Translational repressor Pumilio/PUF3 and related RNA-binding proteins (Puf superfamily); meNOG05370: Pumilio homolog protein	PF00806: Pumilio-family RNA binding repeat	WBPhenotype: Emb; Ste
WBGene00020808|T25F10.6	2796.18	706.56	3.96		301-406 aa	Seg		KOG2046: Calponin; meNOG08038: Calponin 1 protein	PF00402: Calponin family repeat	WBPhenotype: reduced brood size	NOT WBPheno: Bmd; Emb; Gro; Let; Lva; Lvl; Ste; Stp; Variant; postembryonic development variant
WBGene00008602|F09B9.1|oac-14	4.75	1.2	3.96		710 aa	SignalP; Tmhmm; Seg		KOG3700: Predicted acyltransferase; meNOG19353: Annotation not available	PF01757: Acyltransferase family	WBPhenotype: Gro; cadmium hypersensitive	NOT WBPheno: Bmd; Emb; Let; Lva; Lvl; Ste; Stp; Variant; postembryonic development variant
WBGene00023477|C03G5.8|nspc-1	5.13	1.3	3.95		101 aa	SignalP
WBGene00014084|ZK795.4|snb-7	0.87	0.22	3.95		102 aa	Tmhmm; Ncoils		KOG0860: Synaptobrevin/VAMP-like protein	PF00957: Synaptobrevin		NOT WBPheno: Let; Variant; postembryonic development variant
WBGene00044312|K04C2.8	14.39	3.65	3.94		185 aa
WBGene00000984|R11D1.11|dhs-21	77.21	19.66	3.93	OMIM:260800 [PENTOSURIA]	251 aa			COG1028: Dehydrogenases with different specificities (related to short-chain alcohol dehydrogenases); KOG1207: Diacetyl reductase/L-xylulose reductase; meNOG12147: Reductase	PF00106: short chain dehydrogenase; PF02719: Polysaccharide biosynthesis protein; PF08659: KR domain		NOT WBPheno: Bmd; Emb; Gro; Lva; Lvl; Ste; Stp; Variant; postembryonic development variant
WBGene00000205|M01B12.3|arx-7	149.94	38.18	3.93		152 aa			KOG3380: Actin-related protein Arp2/3 complex, subunit ARPC5; meNOG18550: 3 complex protein		WBPhenotype: Emb; Let; Lva; Sck; Ste; Stp; Unc; embryonic development variant; engulfment variant; reduced brood size; ventral enclosure variant	NOT WBPheno: Adl; Bmd; Gro; Lvl; Variant; postembryonic development variant
WBGene00010193|F57C2.1|btb-20	45.41	11.59	3.92		300 aa	Seg			PF00651: BTB/POZ domain		NOT WBPheno: Let; Variant; glp; postembryonic development variant
WBGene00008000|C38C10.2	647.97	165.18	3.92	OMIM:269920 [INFANTILE SIALIC ACID STORAGE DISORDER]; OMIM:604369 [SIALURIA, FINNISH TYPE]; OMIM:605583 [DEAFNESS, AUTOSOMAL DOMINANT 25; DFNA25]	493 aa	SignalP; Tmhmm		COG0477: Permeases of the major facilitator superfamily; KOG2532: Permease of the major facilitator superfamily; meNOG04290: Transporter protein	PF07690: Major Facilitator Superfamily		NOT WBPheno: Bmd; Emb; Gro; Let; Lva; Lvl; Ste; Stp; Variant; embryonic development variant; postembryonic development variant
WBGene00006449|ZK757.3|tag-76	100.02	25.51	3.92		55-1040 aa	Seg		KOG1041: Translation initiation factor 2C (eIF-2C) and related proteins; meNOG06825: Eukaryotic protein	PF02170: PAZ domain; PF02171: Piwi domain; PF08699: Domain of unknown function (DUF1785)		NOT WBPheno: Let; Variant; postembryonic development variant; siRNA expression variant
WBGene00020109|R151.6	32.63	8.34	3.91		237 aa	Tmhmm; Seg		COG5291: Predicted membrane protein; KOG0858: Predicted membrane protein; meNOG05129: Der1-Like protein	PF04511: Der1-like family		NOT WBPheno: Bmd; Emb; Let; Ste; Variant; postembryonic development variant; unfolded protein accumulation
WBGene00020462|T12E12.1	0.78	0.2	3.9		482 aa	Seg; Ncoils		KOG1812: Predicted E3 ubiquitin ligase; meNOG05233: Protein ariadne-2 homolog	PF01485: IBR domain	WBPhenotype: organism oxidative stress resistant	NOT WBPheno: Bmd; Emb; Gro; Let; Lva; Lvl; Ste; Stp; Variant; postembryonic development variant; protein aggregation variant; transgene subcellular localization variant
WBGene00012084|T27D1.3|npr-15	12.48	3.21	3.89	OMIM:145500 [HYPERTENSION, ESSENTIAL]; OMIM:267430 [RENAL TUBULAR DYSGENESIS; RTD]	345 aa	SignalP; Tmhmm; Seg		euNOG07587: G protein-coupled receptor 50; meNOG08403: Galanin receptor	PF00001: 7 transmembrane receptor (rhodopsin family); PF10320: Serpentine type 7TM GPCR chemoreceptor Srsx	WBPhenotype: Gro	NOT WBPheno: Bmd; Egl; Emb; Let; Lva; Lvl; Ste; Stp; Unc; Variant; embryonic development variant; postembryonic development variant
WBGene00044765	0.31	0.08	3.88
WBGene00013678|Y105E8A.20	2.29	0.59	3.88		406-524 aa	Seg; Ncoils		COG0143: Methionyl-tRNA synthetase; KOG0436: Methionyl-tRNA synthetase; meNOG05410: Trna synthetase	PF00133: tRNA synthetases class I (I, L, M and V); PF01406: tRNA synthetases class I (C) catalytic domain; PF09334: tRNA synthetases class I (M)	WBPhenotype: Emb; Let; Sck; Ste; Stp
WBGene00020334|T08A9.1|atg-11	2.54	0.66	3.85	OMIM:114480 [BREAST CANCER]	1330 aa	Seg; Ncoils		KOG4572: Predicted DNA-binding transcription factor, interacts with stathmin; meNOG05858: Rb1-Inducible coiled-coil protein	PF10377: Autophagy-related protein 11		NOT WBPheno: Bmd; Emb; Gro; Let; Lva; Lvl; Ste; Stp; Variant; postembryonic development variant
WBGene00015791|C15C7.5	1546.02	401.92	3.85		125 aa	Seg; Ncoils				WBPhenotype: Clr; Gro; Unc; fat content reduced	NOT WBPheno: Bmd; Emb; Let; Ste; Variant; postembryonic development variant
WBGene00000409|F39H11.3|cdk-8	59.31	15.39	3.85		588 aa	Seg		COG0515: Serine/threonine protein kinase; KOG0666: Cyclin C-dependent kinase CDK8; meNOG04705: Cell division protein	PF00069: Protein kinase domain; PF07714: Protein tyrosine kinase	WBPhenotype: Bmd; Dpy; Emb; Gro; Lvl; Muv; Ste; phasmid socket absent; reduced brood size; short	NOT WBPheno: Let; Lva; Stp; Variant; postembryonic development variant
WBGene00019532|K08D10.9	3.38	0.88	3.84		397 aa						NOT WBPheno: Bmd; Emb; Gro; Let; Lva; Lvl; Ste; Stp; Variant; postembryonic development variant
WBGene00006975|F54F2.2|zfp-1	14.63	3.81	3.84	OMIM:601626 [LEUKEMIA, ACUTE MYELOID; AML]	211-867 aa	SignalP; Tmhmm; Seg; Ncoils	Gupta_TF	COG5141: PHD zinc finger-containing protein; KOG0956: PHD finger protein AF10; meNOG06515: Protein AF	PF00628: PHD-finger	WBPhenotype: Gro; Lvl; Muv; Pvl; RNAi resistant; Ste; ectopic expression transgene; reduced brood size; somatic transgene silencing variant; transgene expression increased	NOT WBPheno: Bmd; Emb; Let; Lva; Stp; Variant; embryonic development variant; postembryonic development variant
WBGene00019100|F59B1.8	3.6	0.94	3.83		420 aa				PF01636: Phosphotransferase enzyme family; PF02958: Domain of unknown function (DUF227); PF07914: Protein of unknown function (DUF1679)	WBPhenotype: Gro; cadmium hypersensitive	NOT WBPheno: Bmd; Emb; Let; Lva; Lvl; Ste; Stp; Variant; postembryonic development variant
WBGene00018806|F54D10.5	167.92	43.81	3.83		235 aa						NOT WBPheno: Bmd; Emb; Gro; Let; Lva; Lvl; Ste; Stp; Variant; postembryonic development variant
WBGene00015262|B0563.5	2.76	0.72	3.83		114 aa	Seg					NOT WBPheno: Bmd; Emb; Ste; Variant
WBGene00009444|F35G12.11	48.21	12.62	3.82		113 aa			KOG1766: Enhancer of rudimentary; meNOG19419: Enhancer of rudimentary homolog protein	PF01133: Enhancer of rudimentary	WBPhenotype: Emb; Lvl	NOT WBPheno: Bmd; Ste; Variant
WBGene00007966|C36A4.5	4.47	1.17	3.82		954 aa	Tmhmm; Seg		KOG3592: Microtubule-associated proteins			NOT WBPheno: Let; Variant; postembryonic development variant
WBGene00015619|C08G9.1	114.03	29.91	3.81		173 aa	SignalP; Tmhmm; Seg			PF01064: Activin types I and II receptor domain
WBGene00004740|T10H9.2|scd-2	2.02	0.53	3.81	OMIM:256700 [NEUROBLASTOMA, SUSCEPTIBILITY TO]; OMIM:613014 [NEUROBLASTOMA, SUSCEPTIBILITY TO, 3; NBLST3]	1446 aa	SignalP; Tmhmm; Seg		COG0515: Serine/threonine protein kinase; KOG1095: Protein tyrosine kinase; meNOG06106: Kinase receptor	PF00069: Protein kinase domain; PF07714: Protein tyrosine kinase	WBPhenotype: Gro; pheromone induced dauer formation defective; pheromone induced dauer formation variant	NOT WBPheno: Bmd; Emb; Let; Lva; Lvl; Ste; Stp; Variant; postembryonic development variant; transgene expression variant
WBGene00004091|T14G10.1|pps-1	43	11.28	3.81	OMIM:612847 [SPONDYLOEPIMETAPHYSEAL DYSPLASIA, PAKISTANI TYPE]	652 aa			COG0529: Adenylylsulfate kinase and related kinases; COG2046: ATP sulfurylase (sulfate adenylyltransferase); KOG4238: Bifunctional ATP sulfurylase/adenosine 5-phosphosulfate kinase; meNOG05242: 5-Phosphosulfate protein	PF01583: Adenylylsulphate kinase; PF01747: ATP-sulfurylase	WBPhenotype: Age; Let; Ste	NOT WBPheno: Bmd; Emb; Variant; age associated fluorescence increased; postembryonic development variant
WBGene00001840|C26D10.2|hel-1	640.64	167.97	3.81		268-425 aa	Seg		COG0513: Superfamily II DNA and RNA helicases; KOG0329: ATP-dependent RNA helicase; meNOG04209: RNA helicase	PF00270: DEAD/DEAH box helicase; PF00271: Helicase conserved C-terminal domain	WBPhenotype: Adl; Bmd; Clr; Emb; Gro; Led; Let; Lva; Lvl; Pvl; Sck; Ste; Stp; mRNA export variant; protein aggregation variant; transgene subcellular localization variant	NOT WBPheno: Variant
WBGene00000942|ZC477.9|deb-1	2.25	0.59	3.81	OMIM:611407 [CARDIOMYOPATHY, DILATED, 1W; CMD1W]; OMIM:613255 [CARDIOMYOPATHY, FAMILIAL HYPERTROPHIC, 15; CMH15]	369-1010 aa	Seg; Ncoils		KOG3681: Alpha-catenin; meNOG05725: Involved in cell adhesion. May be involved in the attachment of the actin-based microfilaments to the plasma membrane	PF01044: Vinculin family	WBPhenotype: Lvl; Pat; body muscle displaced; body wall muscle actin organization defective	NOT WBPheno: Bmd; Emb; Ste; Variant; body wall muscle myosin organization defective; pumping absent
WBGene00000683|Y38C1BA.3|col-109	7849.03	2060.22	3.81		291 aa	Tmhmm; Seg		KOG3544: Collagens (type IV and type XIII), and related proteins	PF01391: Collagen triple helix repeat (20 copies); PF01484: Nematode cuticle collagen N-terminal domain		NOT WBPheno: Bmd; Egl D; Emb; Gro; Let; Lva; Lvl; Ste; Stp; Variant; anoxia hypersensitive; postembryonic development variant
WBGene00018036|F35C8.5	215.44	56.66	3.8		300 aa	Tmhmm; Seg		COG3000: Sterol desaturase; KOG0873: C-4 sterol methyl oxidase; meNOG09990: Cholesterol 25-hydroxylase	PF04116: Fatty acid hydroxylase superfamily		NOT WBPheno: Bmd; Emb; Gro; Let; Lva; Lvl; Ste; Stp; Variant; postembryonic development variant
WBGene00011121|R07E5.17	0.19	0.05	3.8		375 aa	SignalP; Tmhmm
WBGene00007627|C16C10.6|ccdc-55	0.57	0.15	3.8		392 aa	Seg; Ncoils		KOG2117: Uncharacterized conserved protein; meNOG14297: Coiled-Coil domain containing protein	PF09745: Coiled-coil domain-containing protein 55 (DUF2040)	WBPhenotype: Emb; Gro; Lva; distal tip cell migration variant; pattern of transgene expression variant; receptor mediated endocytosis defective; transgene subcellular localization variant	NOT WBPheno: Bmd; Let; Ste; Variant; postembryonic development variant
WBGene00004879|C48B6.6|smg-1	28.89	7.6	3.8	OMIM:210600 [SECKEL SYNDROME 1; SCKL1]	2019-2322 aa	Seg; Ncoils		COG5032: Phosphatidylinositol kinase and protein kinases of the PI-3 kinase family; KOG0891: DNA-dependent protein kinase; meNOG04342: Serine/Threonine-Protein kinase	PF00454: Phosphatidylinositol 3- and 4-kinase	WBPhenotype: Age; Pvl; cell proliferation increased; excess intestinal cells; mRNA surveillance defective	NOT WBPheno: Adl; Bmd; Egl; Emb; Gro; Let; Lva; Lvl; RNAi persistence variant; Ric; Ste; Stp; Variant; movement variant; postembryonic development variant; protein subcellular localization variant
WBGene00001440|F40H3.4|fkh-8	0.53	0.14	3.79		310 aa		Thomas+W_TF	COG5025: Transcription factor of the Forkhead/HNF3 family; KOG2294: Transcription factor of the Forkhead/HNF3 family; meNOG12253: Forkhead box protein	PF00250: Fork head domain	WBPhenotype: Ric	NOT WBPheno: Bmd; Emb; Gro; Let; Lva; Lvl; Ste; Stp; Variant; aldicarb response variant; neuron development variant; postembryonic development variant
WBGene00020068|R13F6.10|cra-1	17.44	4.61	3.78		958 aa	Seg; Ncoils		KOG2053: Mitochondrial inheritance and actin cytoskeleton organization protein; meNOG06121: Has 2 roles in the larval immune response: required both for the phagocytic degradation of internalized bacteria and for the induction of Defensin in the fat body. Within the phagocytic blood cells, has a role in detection of infection and activation of the humoral immune protein	PF09797: N-acetyltransferase B complex (NatB) non catalytic subunit	WBPhenotype: Emb; Sck; Stp; oogenesis variant; reduced brood size	NOT WBPheno: Bmd; Let; Ste; Variant; embryonic development variant; nicotine response variant; postembryonic development variant
WBGene00016448|C35D10.12	0.87	0.23	3.78		365 aa			COG0500: SAM-dependent methyltransferases; KOG1331: Predicted methyltransferase; meNOG07486: Annotation not available	PF01209: ubiE/COQ5 methyltransferase family; PF05148: Hypothetical methyltransferase; PF08241: Methyltransferase domain	WBPhenotype: Gro	NOT WBPheno: Bmd; Emb; Let; Lva; Lvl; Ste; Stp; Variant; embryonic development variant; postembryonic development variant
WBGene00008685|F11A10.4|mon-2	3.36	0.89	3.78		1646 aa	Seg; Ncoils		KOG1848: Uncharacterized conserved protein; meNOG04486: MON2 homolog protein		WBPhenotype: body wall muscle myosin organization defective	NOT WBPheno: Bmd; Emb; Gro; Lva; Lvl; Spd; Ste; Stp; Variant; cell division variant; morphology variant; postembryonic development variant
WBGene00022169|Y71H2AM.4	223.19	59.16	3.77		139 aa	Tmhmm; Seg		KOG4516: NADH:ubiquinone oxidoreductase, NDUFC2/B14.5B subunit	PF06374: NADH-ubiquinone oxidoreductase subunit b14.5b (NDUFC2)	WBPhenotype: Age; Emb; Gro; Lva; paraquat resistant; pattern of transgene expression variant; receptor mediated endocytosis defective	NOT WBPheno: Bmd; Ste; Variant
WBGene00012124|T28D6.4	0.49	0.13	3.77		991 aa	Seg		COG0666: FOG: Ankyrin repeat; KOG0504: FOG: Ankyrin repeat; meNOG05329: Ankyrin repeat domain-containing protein	PF00023: Ankyrin repeat	WBPhenotype: Age; Gro; paraquat resistant; spontaneous mutation rate increased; tail spike variant	NOT WBPheno: Bmd; Dyf; Emb; Let; Lva; Lvl; Ste; Stp; Unc; Variant; embryonic development variant; postembryonic development variant; transgene expression variant
WBGene00004436|D1007.12|rpl-24.1	29055.9	7710.71	3.77		159 aa	Seg; Ncoils		COG2075: Ribosomal protein L24E; KOG1722: 60s ribosomal protein L24; meNOG19528: Ribosomal protein		WBPhenotype: Daf c; Emb; Gro; Lva; Ste; protein aggregation variant; transgene subcellular localization variant
WBGene00002057|R04E5.10|ifd-1	41.27	10.95	3.77	OMIM:115200 [CARDIOMYOPATHY, DILATED, 1A; CMD1A]; OMIM:151660 [LIPODYSTROPHY, FAMILIAL PARTIAL, TYPE 2; FPLD2]; OMIM:159001 [MUSCULAR DYSTROPHY, LIMB-GIRDLE, TYPE 1B; LGMD1B]; OMIM:176670 [HUTCHINSON-GILFORD PROGERIA SYNDROME; HGPS]; OMIM:181350 [EMERY-DREIFUSS MUSCULAR DYSTROPHY 2, AUTOSOMAL DOMINANT; EDMD2]; OMIM:212112 [CARDIOMYOPATHY, DILATED, WITH HYPERGONADOTROPIC HYPOGONADISM]; OMIM:248370…	465-575 aa	Seg; Ncoils		KOG0977: Nuclear envelope protein lamin, intermediate filament superfamily	PF00038: Intermediate filament protein		NOT WBPheno: Bmd; Emb; Gro; Let; Lva; Lvl; Ste; Stp; Variant; nuclear positioning variant; postembryonic development variant
WBGene00013534|Y73F8A.30|acr-24	0.64	0.17	3.76		552 aa	Tmhmm; Seg		KOG3645: Acetylcholine receptor	PF02931: Neurotransmitter-gated ion-channel ligand binding domain; PF02932: Neurotransmitter-gated ion-channel transmembrane region
WBGene00004509|M01G12.12|rrf-2	1.24	0.33	3.76		1579 aa	Seg; Ncoils		KOG0988: RNA-directed RNA polymerase QDE-1 required for posttranscriptional gene silencing and RNA interference	PF05183: RNA dependent RNA polymerase	WBPhenotype: 21U RNA expression variant	NOT WBPheno: Let; Variant; postembryonic development variant; siRNA expression variant
WBGene00001452|C36H8.3|flp-9	50.46	13.42	3.76		102 aa	SignalP					NOT WBPheno: Bmd; Emb; Gro; Let; Lva; Lvl; Ste; Stp; Variant; postembryonic development variant
WBGene00021876|Y54G2A.11	0.15	0.04	3.75		74-482 aa	Tmhmm; Seg					NOT WBPheno: Bmd; Emb; Ste; Variant
WBGene00017506|F16B4.4	20.35	5.43	3.75		91 aa	SignalP; Seg					NOT WBPheno: Bmd; Emb; Gro; Let; Lva; Lvl; Ste; Stp; Variant; postembryonic development variant
WBGene00009543|F38E11.6	0.15	0.04	3.75	OMIM:612631 [ADENYLATE KINASE DEFICIENCY, HEMOLYTIC ANEMIA DUE TO]	416-418 aa				PF00406: Adenylate kinase	WBPhenotype: protein aggregation variant	NOT WBPheno: Bmd; Emb; Gro; Lva; Lvl; Ste; Stp; Variant; postembryonic development variant
WBGene00009182|F26H11.4	14.93	3.98	3.75		497 aa	Seg
WBGene00007885|C33A12.6|ugt-21	0.15	0.04	3.75		534 aa	SignalP; Tmhmm; Seg		COG1819: Glycosyl transferases, related to UDP-glucuronosyltransferase; KOG1192: UDP-glucuronosyl and UDP-glucosyl transferase; meNOG12359: Udp-Galactose ceramide galactosyltransferase	PF00201: UDP-glucoronosyl and UDP-glucosyl transferase; PF04101: Glycosyltransferase family 28 C-terminal domain	WBPhenotype: fat content increased	NOT WBPheno: Bmd; Emb; Gro; Let; Lva; Lvl; Ste; Stp; Variant; postembryonic development variant
WBGene00001615|C06A8.9|glr-4	1.5	0.4	3.75	OMIM:611092 [MENTAL RETARDATION, AUTOSOMAL RECESSIVE 6; MRT6]	877-951 aa	SignalP; Tmhmm		KOG1052: Glutamate-gated kainate-type ion channel receptor subunit GluR5 and related subunits; meNOG05718: Glutamate protein	PF00060: Ligand-gated ion channel; PF00497: Bacterial extracellular solute-binding proteins, family 3; PF01094: Receptor family ligand binding region; PF10613: Ligated ion channel L-glutamate- and glycine-binding site	WBPhenotype: Let; Ric; Ste	NOT WBPheno: Bmd; Emb; Gro; Lva; Lvl; Stp; Variant; postembryonic development variant
WBGene00001587|C45B2.4|ggr-2	0.9	0.24	3.75	OMIM:149400 [HYPEREKPLEXIA, HEREDITARY]	513-546 aa	SignalP; Tmhmm; Seg		KOG3644: Ligand-gated ion channel; meNOG04494: Glycine receptor	PF02931: Neurotransmitter-gated ion-channel ligand binding domain; PF02932: Neurotransmitter-gated ion-channel transmembrane region		NOT WBPheno: Bmd; Emb; Ste; Variant
WBGene00001135|ZK512.6|eat-4	0.15	0.04	3.75	OMIM:269920 [INFANTILE SIALIC ACID STORAGE DISORDER]; OMIM:604369 [SIALURIA, FINNISH TYPE]; OMIM:605583 [DEAFNESS, AUTOSOMAL DOMINANT 25; DFNA25]	576 aa	Tmhmm; Seg		COG0477: Permeases of the major facilitator superfamily; KOG2532: Permease of the major facilitator superfamily; meNOG05779: Inorganic phosphate protein	PF07690: Major Facilitator Superfamily	WBPhenotype: L1 arrest; aqueous adaptation defective; dopamine adaptation variant; evoked postsynaptic current variant; foraging behavior variant; foraging hyperactive; pharyngeal pumping reduced; pharyngeal relaxation defective; pharynx slippery; protein subcellular localization variant; sodium chloride chemotaxis variant	NOT WBPheno: Bmd; Egl D; Emb; Gro; Let; Lva; Lvl; Ste; Stp; Variant; associative learning variant; carbon dioxide avoidance variant; embryonic development variant; fat content variant; postembryonic development variant
WBGene00015954|C18B2.3	22.2	5.93	3.74		236 aa	Seg					NOT WBPheno: Bmd; Emb; Gro; Lva; Lvl; Ste; Stp; Variant; postembryonic development variant
WBGene00010091|F55C5.1	3.14	0.84	3.74		107 aa						NOT WBPheno: Bmd; Emb; Gro; Let; Lva; Lvl; Ste; Stp; Variant; postembryonic development variant
WBGene00009576|F40F8.3	11.83	3.16	3.74		146 aa	Tmhmm; Seg
WBGene00003424|F26G1.7|msp-3	67.27	17.97	3.74		127 aa				PF00635: MSP (Major sperm protein) domain
WBGene00000772|B0414.5|cpb-3	41.24	11.08	3.72		745 aa	Seg		KOG0129: Predicted RNA-binding protein (RRM superfamily); meNOG05995: Cytoplasmic polyadenylation element binding protein 1	PF00076: RNA recognition motif. (a.k.a. RRM, RBD, or RNP domain)	WBPhenotype: Ced; Emb; Fgc; Gro; Ste; accumulated germline cell corpses; apoptosis increased; germ cell development variant; pachytene arrested germline nuclei; reduced brood size; spermatogenesis to oogenesis switch defective	NOT WBPheno: Bmd; Let; Lva; Lvl; Stp; Unc; Variant; brood size variant; fertility variant; morphology variant; postembryonic development variant
WBGene00018370|F42H10.6	2.15	0.58	3.71		169 aa			KOG3328: HGG motif-containing thioesterase; meNOG19501: Thioesterase superfamily member	PF03061: Thioesterase superfamily		NOT WBPheno: Let; Variant; postembryonic development variant
WBGene00009374|F34D10.4	0.26	0.07	3.71		692 aa	Seg				WBPhenotype: Gro	NOT WBPheno: Bmd; Emb; Let; Lva; Lvl; Ste; Stp; Variant; postembryonic development variant
WBGene00004274|F53G12.1|rab-11.1	31.35	8.44	3.71		211 aa			COG1100: GTPase SAR1 and related small G proteins; KOG0087: GTPase Rab11/YPT3, small G protein superfamily; meNOG04798: Ras-Related protein Rab	PF00009: Elongation factor Tu GTP binding domain; PF00025: ADP-ribosylation factor family; PF00071: Ras family; PF04670: Gtr1/RagA G protein conserved region; PF08477: Miro-like protein	WBPhenotype: Cyk; Emb; Let; Lva; Lvl; Ste; spindle orientation variant	NOT WBPheno: antibody subcellular localization variant; transgene subcellular localization variant
WBGene00019727|M02D8.1	620.82	167.99	3.7	OMIM:600334 [TIBIAL MUSCULAR DYSTROPHY, TARDIVE]; OMIM:603075 [MACULAR DEGENERATION, AGE-RELATED, 1; ARMD1]; OMIM:603689 [HEREDITARY MYOPATHY WITH EARLY RESPIRATORY FAILURE; HMERF]; OMIM:604145 [CARDIOMYOPATHY, DILATED, 1G; CMD1G]; OMIM:608807 [MUSCULAR DYSTROPHY, LIMB-GIRDLE, TYPE 2J; LGMD2J]; OMIM:611705 [MYOPATHY, EARLY-ONSET, WITH FATAL CARDIOMYOPATHY]; OMIM:613765 [CARDIOMYOPATHY, FAMILIAL H…	197 aa	Seg		KOG4475: FOG: Immunoglobin and related proteins; meNOG04818: Chromosome undetermined SCAF15134, whole genome shotgun protein	PF07679: Immunoglobulin I-set domain		NOT WBPheno: Let; Variant; postembryonic development variant
WBGene00011799|T16G1.5	2.95	0.8	3.69		434 aa	Ncoils		NOG74514: Znf_C4 abd HLH domain containing kinases domain-containing protein; euNOG14338: Znf_C4 abd HLH domain containing kinases domain-containing protein; meNOG24447: Znf_C4 abd HLH domain containing kinases domain-containing protein	PF01636: Phosphotransferase enzyme family; PF02958: Domain of unknown function (DUF227); PF07914: Protein of unknown function (DUF1679)		NOT WBPheno: Bmd; Emb; Let; Ste; Variant; postembryonic development variant
WBGene00018957|F56C11.5	9.65	2.62	3.68		224-230 aa	Tmhmm; Seg				WBPhenotype: Emb; Mul; protein aggregation variant	NOT WBPheno: Bmd; Let; Ste; Variant; postembryonic development variant
WBGene00009780|F46C5.4	2.39	0.65	3.68		187 aa	SignalP					NOT WBPheno: Bmd; Emb; Ste; Variant
WBGene00003432|C04G2.4|msp-36	49.65	13.48	3.68		127 aa				PF00635: MSP (Major sperm protein) domain		NOT WBPheno: Bmd; Emb; Let; Ste; Variant
WBGene00022415|Y102A11A.5	17.03	4.64	3.67		132 aa	SignalP					NOT WBPheno: Bmd; Emb; Ste; Variant
WBGene00018261|F41B5.3|cyp-33C5	0.11	0	3.67	OMIM:122700 [COUMARIN RESISTANCE]; OMIM:122720 [CYTOCHROME P450, SUBFAMILY IIA, POLYPEPTIDE 6; CYP2A6]; OMIM:137750 [GLAUCOMA 1, OPEN ANGLE, A; GLC1A]; OMIM:137760 [GLAUCOMA, PRIMARY OPEN ANGLE; POAG]; OMIM:188890 [TOBACCO ADDICTION, SUSCEPTIBILITY TO]; OMIM:202110 [ADRENAL HYPERPLASIA, CONGENITAL, DUE TO 17-ALPHA-HYDROXYLASE DEFICIENCY]; OMIM:211980 [LUNG CANCER]; OMIM:231300 [GLAUCOMA 3, PRIMAR…	494 aa	SignalP; Seg		COG2124: Cytochrome P450; KOG0156: Cytochrome P450 CYP2 subfamily; meNOG12844: Cytochrome P450 family member cyp protein	PF00067: Cytochrome P450		NOT WBPheno: Bmd; Emb; Let; Ste; Variant
WBGene00016570|C41G11.4|gnrr-4	0.11	0	3.67	OMIM:146110 [HYPOGONADOTROPIC HYPOGONADISM]; OMIM:228300 [FERTILE EUNUCH SYNDROME]	493-557 aa	Tmhmm; Seg		KOG3656: FOG: 7 transmembrane receptor	PF00001: 7 transmembrane receptor (rhodopsin family)		NOT WBPheno: Bmd; Emb; Gro; Let; Lva; Lvl; Ste; Stp; Variant; postembryonic development variant
WBGene00014069|ZK678.3	0.11	0	3.67		163 aa			KOG0654: G2/Mitotic-specific cyclin A	PF00134: Cyclin, N-terminal domain
WBGene00013667|Y105E8A.2	0.11	0	3.67		534 aa	SignalP; Seg		KOG3394: Protein OS-9; meNOG06458: Xtp3-Transactivated gene B protein	PF07915: Glucosidase II beta subunit-like protein		NOT WBPheno: Bmd; Emb; Ste; Variant
WBGene00013637|Y105C5A.13	0.11	0	3.67		76-114 aa						NOT WBPheno: Let; Variant; postembryonic development variant
WBGene00012967|Y48A6B.6	0.11	0	3.67		503-512 aa	Tmhmm; Seg		COG1226: Kef-type K+ transport systems, predicted NAD-binding component; KOG3713: Voltage-gated K+ channel KCNB/KCNC; meNOG06593: Potassium protein	PF00520: Ion transport protein; PF02214: K+ channel tetramerisation domain; PF07885: Ion channel; PF08016: Polycystin cation channel		NOT WBPheno: Bmd; Emb; Gro; Lva; Lvl; Ste; Stp; Variant; embryonic development variant; postembryonic development variant
WBGene00012896|Y46G5A.4	0.11	0	3.67	OMIM:610359 [RETINITIS PIGMENTOSA 33; RP33]	2145 aa	Seg		COG1204: Superfamily II helicase; KOG0951: RNA helicase BRR2, DEAD-box superfamily; meNOG05544: Activating signal cointegrator 1 complex subunit 3	PF00270: DEAD/DEAH box helicase; PF00271: Helicase conserved C-terminal domain; PF02889: Sec63 Brl domain; PF04851: Type III restriction enzyme, res subunit	WBPhenotype: Emb; Ste; cell proliferation increased; excess intestinal cells; organism hypertonic lethality increased; protein aggregation variant; thin; transgene subcellular localization variant	NOT WBPheno: Bmd; Variant
WBGene00012613|Y38H6A.2	0.11	0	3.67		164 aa	Seg					NOT WBPheno: Bmd; Emb; Ste; Variant
WBGene00011119|R07E5.13	0.11	0	3.67		160 aa	Tmhmm; Seg		KOG1590: Uncharacterized conserved protein; meNOG19626: Brain protein 44-like	PF03650: Uncharacterised protein family (UPF0041)
WBGene00007897|C33D9.2|clec-182	0.11	0	3.67		339 aa						NOT WBPheno: Bmd; Emb; Gro; Lva; Lvl; Ste; Stp; Variant; postembryonic development variant
WBGene00007856|C31H5.5	0.11	0	3.67		159 aa	Seg					NOT WBPheno: Bmd; Emb; Gro; Let; Lva; Lvl; Ste; Stp; Variant; postembryonic development variant
WBGene00007530|C11H1.5	0.11	0	3.67		528 aa	SignalP; Seg					NOT WBPheno: Bmd; Emb; Gro; Lva; Lvl; Ste; Stp; Variant; postembryonic development variant
WBGene00002324|Y54E5B.3|let-49	0.11	0	3.67		251-253 aa	Seg; Ncoils		KOG0570: Transcriptional coactivator; meNOG07759: Component of the Mediator complex, a coactivator involved in the regulated transcription of nearly all RNA polymerase II-dependent genes. Mediator functions as a bridge to convey information from gene-specific regulatory proteins to the basal RNA polymerase II transcription machinery. Mediator is recruited to promoters by direct interactions with …	PF05983: MED7 protein	WBPhenotype: Dpy; Emb; Gro; Led; Pvl; Rup; Stp; Unc; germ cell development variant; gonad development variant; late embryonic arrest	NOT WBPheno: Bmd; Let; Ste; Variant; postembryonic development variant
WBGene00001368|F35H8.5|exc-7	0.11	0	3.67		456 aa	Seg		COG0724: RNA-binding proteins (RRM domain); KOG0145: RNA-binding protein ELAV/HU (RRM superfamily); meNOG07225: Elav-Like protein	PF00076: RNA recognition motif. (a.k.a. RRM, RBD, or RNP domain)	WBPhenotype: Ric; cell proliferation increased; excess intestinal cells	NOT WBPheno: Bmd; Emb; Gro; Let; Lva; Lvl; Sck; Ste; Stp; Unc; Variant; expulsion variant; growth variant; neuron development variant; neuron morphology variant; postembryonic development variant; synapse morphology variant
WBGene00013606|Y102A5A.1|cand-1	3.18	0.87	3.66		1274 aa	Seg		KOG1824: TATA-binding protein-interacting protein; meNOG05404: Cullin-Associated NEDD8-dissociated protein	PF08623: TATA-binding protein interacting (TIP20)	WBPhenotype: Emb; Gro; Lva	NOT WBPheno: Bmd; Let; Lvl; Ste; Stp; Variant; postembryonic development variant
WBGene00000779|F28H1.2|cpn-3	2363.23	646.03	3.66		142 aa			COG5199: Calponin; KOG2046: Calponin; meNOG10622: Transgelin 3 protein	PF00307: Calponin homology (CH) domain	WBPhenotype: Emb; Lva	NOT WBPheno: Bmd; Let; Ste; Variant; postembryonic development variant
WBGene00009740|F45H10.3	1497.55	410.37	3.65		168 aa			KOG4630: NADH:ubiquinone oxidoreductase, NDUFA7/B14.5A subunit	PF07347: NADH:ubiquinone oxidoreductase subunit B14.5a (Complex I-B14.5a)		NOT WBPheno: Bmd; Emb; Let; Ste; Variant; postembryonic development variant
WBGene00006390|ZK1320.12|taf-8	1.46	0.4	3.65	OMIM:112100 [YT BLOOD GROUP ANTIGEN]	495-497 aa	Seg		KOG1001: Helicase-like transcription factor HLTF/DNA helicase RAD5, DEAD-box superfamily; KOG4336: TBP-associated transcription factor Prodos; meNOG08612: Tbp-Associated factor	PF07524: Bromodomain associated; PF10406: Transcription factor TFIID complex subunit 8 C-term		NOT WBPheno: Bmd; Emb; Ste; Variant
WBGene00008561|F07H5.10	146.76	40.29	3.64		334 aa			KOG1982: Nuclear 5-3 exoribonuclease-interacting protein, Rai1p	PF08652: RAI1 like		NOT WBPheno: Bmd; Emb; Gro; Let; Lva; Lvl; Ste; Stp; Variant; meiosis variant; postembryonic development variant
WBGene00021398|Y38C1AA.7	42.03	11.58	3.63		159 aa	Tmhmm; Seg				WBPhenotype: Sck	NOT WBPheno: Bmd; Emb; Let; Ste; Variant; postembryonic development variant
WBGene00015150|B0336.13	83.23	22.91	3.63		139 aa	Seg		COG5123: Transcription initiation factor IIA, gamma subunit; KOG3463: Transcription initiation factor IIA, gamma subunit; meNOG19479: Transcription protein	PF02268: Transcription initiation factor IIA, gamma subunit, helical domain; PF02751: Transcription initiation factor IIA, gamma subunit		NOT WBPheno: Bmd; Emb; Ste; Variant
WBGene00018602|F48D6.4	202.45	55.95	3.62		76-98 aa						NOT WBPheno: Bmd; Emb; Gro; Let; Lva; Lvl; Ste; Stp; Variant; postembryonic development variant
WBGene00016812|C50D2.9	0.87	0.24	3.62		411 aa	Tmhmm; Seg; Ncoils		COG0331: (acyl-carrier-protein) S-malonyltransferase; KOG2926: Malonyl-CoA:ACP transacylase; meNOG05967: Malonyl coa protein	PF00698: Acyl transferase domain
WBGene00011190|R10D12.9	0.87	0.24	3.62		221 aa	SignalP; Tmhmm		KOG1623: Multitransmembrane protein	PF03083: MtN3/saliva family		NOT WBPheno: Bmd; Emb; Ste; Variant
WBGene00015935|C17H12.10	2.41	0.67	3.6		225 aa	Tmhmm; Seg					NOT WBPheno: Let; Variant; postembryonic development variant
WBGene00003465|T13F2.11|msp-78	34.59	9.62	3.6		127 aa				PF00635: MSP (Major sperm protein) domain		NOT WBPheno: Bmd; Emb; Let; Ste; Variant
WBGene00013308|Y57G11C.12|nuo-3	307.88	85.73	3.59		74-131 aa	Ncoils		KOG3426: NADH:ubiquinone oxidoreductase, NDUFA6/B14 subunit; meNOG19550: NADH dehydrogenase		WBPhenotype: Age; Emb; Gro; Lva; mRNA levels increased; paraquat resistant	NOT WBPheno: Bmd; Let; Ste; Variant; postembryonic development variant
WBGene00010675|K08E7.8	1.58	0.44	3.59		142-176 aa	Seg		KOG4579: Leucine-rich repeat (LRR) protein associated with apoptosis in muscle tissue; meNOG14952: Leucine rich repeat containing protein	PF00560: Leucine Rich Repeat		NOT WBPheno: Bmd; Emb; Gro; Let; Lva; Lvl; Ste; Stp; Variant; postembryonic development variant
WBGene00008125|C47A4.5	3.94	1.1	3.58		75 aa	Seg					NOT WBPheno: Let; Variant; postembryonic development variant
WBGene00007848|C31E10.7	130.27	36.36	3.58	OMIM:250790 [METHEMOGLOBINEMIA TYPE IV]	134 aa	Tmhmm; Seg		COG5274: Cytochrome b involved in lipid metabolism; KOG0537: Cytochrome b5; meNOG19106: Cytochrome b5 protein	PF00173: Cytochrome b5-like Heme/Steroid binding domain	WBPhenotype: Clr; Emb; Gro; Lva; Lvl; Unc; cell secretion variant; pattern of transgene expression variant; receptor mediated endocytosis defective	NOT WBPheno: Bmd; Ste; Variant
WBGene00022400|Y97E10AR.5|rpb-9	161.25	45.13	3.57		167 aa			COG1594: DNA-directed RNA polymerase, subunit M/Transcription elongation factor TFIIS; KOG2691: RNA polymerase II subunit 9; meNOG18653: RNA polymerase	PF01096: Transcription factor S-II (TFIIS); PF02150: RNA polymerases M/15 Kd subunit		NOT WBPheno: Bmd; Emb; Ste; Variant
WBGene00007022|ZK970.3|mdt-22	103.62	29.05	3.57		157 aa	Seg; Ncoils		KOG3304: Surfeit family protein 5; meNOG13324: Component of the Mediator complex, a coactivator involved in the regulated transcription of nearly all RNA polymerase II-dependent genes. Mediator functions as a bridge to convey information from gene-specific regulatory proteins to the basal RNA polymerase II transcription machinery. Mediator is recruited to promoters by direct interactions with reg…	PF06179: Surfeit locus protein 5 subunit 22 of Mediator complex	WBPhenotype: Emb	NOT WBPheno: Bmd; Let; Ste; Variant; postembryonic development variant
WBGene00003160|C50F4.11|mdf-1	6.14	1.72	3.57	OMIM:176807 [PROSTATE CANCER]	679 aa	Seg; Ncoils			PF05557: Mitotic checkpoint protein	WBPhenotype: Gro; Pvl; Unc; cell cycle variant; glp; organism starvation response variant	NOT WBPheno: Let; Variant
WBGene00007094|B0019.2	32.15	9.03	3.56		747 aa	Seg	Thomas+W_TF		PF04435: Domain of unknown function (DUF545)		NOT WBPheno: Bmd; Emb; Gro; Let; Lva; Lvl; Ste; Stp; Variant; postembryonic development variant
WBGene00022336|Y82E9BR.3	7341.61	2075.73	3.54		116 aa	Tmhmm; Seg		COG0636: F0F1-type ATP synthase, subunit c/Archaeal/vacuolar-type H+-ATPase, subunit K; KOG3025: Mitochondrial F1F0-ATP synthase, subunit c/ATP9/proteolipid; meNOG19593: ATP synthase	PF00137: ATP synthase subunit C
WBGene00019658|K11H12.1	0.46	0.13	3.54		108 aa			COG0271: Stress-induced morphogen (activity unknown); KOG2313: Stress-induced protein UVI31+; meNOG19686: Bola-Like protein	PF01722: BolA-like protein		NOT WBPheno: Bmd; Emb; Gro; Let; Lva; Lvl; Ste; Stp; Variant; postembryonic development variant
WBGene00018137|F37A4.9|bath-41	309.34	87.36	3.54		418 aa	Seg		KOG1987: Speckle-type POZ protein SPOP and related proteins with TRAF, MATH and BTB/POZ domains; meNOG05246: Speckle-Type poz protein	PF00651: BTB/POZ domain; PF00917: MATH domain		NOT WBPheno: Bmd; Emb; Let; Ste; Variant
WBGene00016447|C35D10.11|msd-4	9.27	2.62	3.54		109 aa	Seg			PF00635: MSP (Major sperm protein) domain		NOT WBPheno: Bmd; Emb; Let; Ste; Variant; postembryonic development variant
WBGene00010175|F56H11.2	7.86	2.22	3.54		129-179 aa	SignalP; Tmhmm					NOT WBPheno: Bmd; Emb; Gro; Lva; Lvl; Ste; Stp; Variant; postembryonic development variant
WBGene00012375|W09H1.5|mecr-1	734.68	208.28	3.53		344 aa	Ncoils		COG0604: NADPH:quinone reductase and related Zn-dependent oxidoreductases; KOG0025: Zn2+-binding dehydrogenase (nuclear receptor binding factor-1); meNOG05399: Trans-2-Enoyl-Coa protein	PF00107: Zinc-binding dehydrogenase; PF08240: Alcohol dehydrogenase GroES-like domain	WBPhenotype: Age	NOT WBPheno: Bmd; Emb; Gro; Let; Lva; Lvl; Ste; Stp; Variant; postembryonic development variant
WBGene00009364|F33H1.3	13.82	3.92	3.53		359 aa	Seg; Ncoils		KOG4672: Uncharacterized conserved low complexity protein	PF09429: WW domain binding protein 11	WBPhenotype: Bmd; Dpy; Emb; Gro; Him; Lva; Lvl; Rol; Stp; meiosis variant	NOT WBPheno: Let; Ste; Variant; postembryonic development variant
WBGene00020315|T07E3.4	27.43	7.8	3.52		354-427 aa	Seg; Ncoils			PF00646: F-box domain		NOT WBPheno: Bmd; Emb; Gro; Let; Lva; Lvl; Ste; Stp; Variant; embryonic development variant; postembryonic development variant
WBGene00011156|R09B3.3	118.6	33.73	3.52		85 aa	Seg		COG0724: RNA-binding proteins (RRM domain); KOG0108: mRNA cleavage and polyadenylation factor I complex, subunit RNA15; meNOG06916: Cleavage stimulation factor	PF00076: RNA recognition motif. (a.k.a. RRM, RBD, or RNP domain)	WBPhenotype: Emb	NOT WBPheno: Bmd; Gro; Let; Lva; Lvl; Ste; Stp; Variant; postembryonic development variant
WBGene00007184|B0464.2	43.86	12.45	3.52		206-1201 aa	SignalP; Seg; Ncoils		COG0457: FOG: TPR repeat; KOG2002: TPR-containing nuclear phosphoprotein that regulates K(+) uptake; meNOG04047: RNA polymerase-associated protein Ctr9 homolog	PF00515: Tetratricopeptide repeat	WBPhenotype: Emb; Lva	NOT WBPheno: Bmd; Ste; Variant
WBGene00044515|K10C9.9	10.12	2.88	3.51		97 aa	SignalP
WBGene00020854|T27C4.1	3.26	0.93	3.51		243 aa	Tmhmm; Seg					NOT WBPheno: Bmd; Emb; Gro; Lva; Lvl; Ste; Stp; Variant; postembryonic development variant
WBGene00008878|F16A11.3|ppfr-1	19.34	5.51	3.51		1046-1562 aa	SignalP; Tmhmm; Seg; Ncoils		KOG0211: Protein phosphatase 2A regulatory subunit A and related proteins; meNOG09796: Protein phosphatase 4, regulatory subunit 1		WBPhenotype: Let; Ste	NOT WBPheno: Bmd; Emb; Variant
WBGene00019307	0.14	0.04	3.5
WBGene00018218|F40A3.3	137.91	39.45	3.5		185-221 aa	SignalP		COG1881: Phospholipid-binding protein; KOG3346: Phosphatidylethanolamine binding protein; meNOG09738: Phosphatidylethanolamine-Binding protein	PF01161: Phosphatidylethanolamine-binding protein		NOT WBPheno: Bmd; Emb; Gro; Let; Lva; Lvl; Ste; Stp; Variant; postembryonic development variant
WBGene00013479|Y69H2.1	0.14	0.04	3.5		343 aa	Tmhmm; Seg			PF06681: Protein of unknown function (DUF1182)		NOT WBPheno: Bmd; Emb; Gro; Let; Lva; Lvl; Ste; Stp; Variant; postembryonic development variant
WBGene00004893|F53H8.4|sms-2	0.35	0.1	3.5		335 aa	Tmhmm		KOG3058: Uncharacterized conserved protein; meNOG06174: Bidirectional lipid cholinephosphotransferase capable of converting phosphatidylcholine (PC) and ceramide to sphingomyelin and diacylglycerol and vice versa. Direction is dependent on the relative concentrations of DAG and ceramide as phosphocholine acceptors. Directly and specifically recognizes the choline head group on the substrate. Also…			NOT WBPheno: Bmd; Emb; Let; Ste; Variant; postembryonic development variant
WBGene00017967|F32A5.1|ada-2	1.5	0.43	3.49		583-596 aa	Seg; Ncoils	Thomas+W_TF	COG5114: Histone acetyltransferase complex SAGA/ADA, subunit ADA2; KOG0457: Histone acetyltransferase complex SAGA/ADA, subunit ADA2; meNOG11206: Transcriptional protein	PF00249: Myb-like DNA-binding domain	WBPhenotype: Emb; Ste; Stp	NOT WBPheno: Bmd; Gro; Lva; Lvl; Variant; ectopic expression transgene; postembryonic development variant
WBGene00015232|B0511.6	1187.91	339.93	3.49		544 aa	Seg; Ncoils		COG0513: Superfamily II DNA and RNA helicases; KOG0342: ATP-dependent RNA helicase pitchoune; meNOG04061: Atp-Dependent RNA helicase DDX18	PF00270: DEAD/DEAH box helicase; PF00271: Helicase conserved C-terminal domain; PF04851: Type III restriction enzyme, res subunit	WBPhenotype: Age; Lva; Lvl; protein subcellular localization variant; transgene expression variant	NOT WBPheno: Bmd; Emb; Gro; Ste; Stp; Variant; postembryonic development variant
WBGene00011573|T07C12.9	12.74	3.65	3.49		283 aa			NOG71857: N-Methyltransferase; euNOG06999: N-Methyltransferase; meNOG15070: N-Methyltransferase	PF01234: NNMT/PNMT/TEMT family		NOT WBPheno: Bmd; Emb; Gro; Lva; Lvl; Ste; Stp; Variant; postembryonic development variant
WBGene00002226|C41G7.2|klp-16	25.94	7.44	3.49		587 aa	Ncoils		COG5059: Kinesin-like protein; KOG0239: Kinesin (KAR3 subfamily); meNOG06698: Kinesin-Like protein KIFC1	PF00225: Kinesin motor domain	WBPhenotype: Emb; Gro; Him; Lva; Sck; Ste; Stp; reduced brood size	NOT WBPheno: Variant
WBGene00022162|Y71G12B.27	16.32	4.69	3.48		118 aa			KOG3484: Cyclin-dependent protein kinase CDC28, regulatory subunit CKS1, and related proteins; meNOG21033: Cyclin dependent kinases	PF01111: Cyclin-dependent kinase regulatory subunit	WBPhenotype: Emb; meiosis variant; mitosis variant	NOT WBPheno: Bmd; Gro; Let; Lva; Lvl; Ste; Stp; Variant; germ cell morphology variant; postembryonic development variant; reduced brood size
WBGene00012781|Y43C5A.1|nspd-7	4.21	1.21	3.48		70 aa	Seg					NOT WBPheno: Bmd; Emb; Let; Ste; Variant
WBGene00001235|Y41C4A.10|elb-1	92.42	26.58	3.48		118 aa			KOG4495: RNA polymerase II transcription elongation factor Elongin/SIII, subunit elongin B; meNOG19439: Transcription elongation factor B polypeptide 2		WBPhenotype: Bmd; Egl; Emb; Lva; Pvl; Ste; Stp; Unc; reduced brood size
WBGene00015582|C07H6.9	4.51	1.3	3.47		139 aa	Tmhmm					NOT WBPheno: Bmd; Emb; Ste; Variant
WBGene00011299|R107.4|ikke-1	190.87	55.04	3.47		754-820 aa	Seg; Ncoils		COG0515: Serine/threonine protein kinase; KOG4250: TANK binding protein kinase TBK1; meNOG06229: Serine/Threonine-Protein kinase TBK1 (EC 2.7.11.1)	PF00069: Protein kinase domain; PF07714: Protein tyrosine kinase	WBPhenotype: fat content reduced	NOT WBPheno: Bmd; Emb; Gro; Let; Lva; Lvl; Ste; Stp; Variant; fat content variant; postembryonic development variant
WBGene00004999|K09F5.3|spp-14	226.17	65.17	3.47		103 aa	SignalP; Seg					NOT WBPheno: Bmd; Emb; Let; Ste; Variant
WBGene00044009|ZK822.6	0.45	0.13	3.46		124 aa	Ncoils			PF02520: Domain of unknown function DUF148		NOT WBPheno: Let
WBGene00022047|Y66H1A.5	90.19	26.04	3.46		217 aa	SignalP; Seg					NOT WBPheno: Bmd; Emb; Gro; Let; Lva; Lvl; Ste; Stp; Variant; postembryonic development variant
[truncated: 6,733 more rows]
